# Supplementary material for: Regioselective approach to colchiceine tropolone ring functionalization at C(9) and C(10) yielding new anticancer hybrid derivatives containing heterocyclic structural motifs
Source: PubMed Central journal article supplement (PMC8788354; doi:10.1080/14756366.2022.2028782), 2022-01-24
Supplement: IENZ_A_2028782_SM6785.pdf [file IENZ_A_2028782_SM6785.pdf]

## Supplemental Material

# Regioselective approach to colchicine tropolone ring functionalization at C(9) and C(10) yielding new anticancer hybrid derivatives containing heterocyclic structural motifs

Krystian Pyta<sup>a</sup>, Natalia Skrzypczak<sup>a</sup>, Piotr Ruszkowski<sup>b</sup>, Franz Bartl<sup>c</sup>, Piotr Przybylski<sup>a\*</sup>

<sup>a</sup>Faculty of Chemistry, Adam Mickiewicz University, Uniwersytetu Poznańskiego 8, 61-614, Poznan, Poland; <sup>b</sup>Department of Pharmacology, Poznan University of Medical Sciences, Rokietnicka 5a, 60-806 Poznan, Poland; <sup>c</sup>Lebenswissenschaftliche Fakultät, Institut für Biologie, Biophysikalische Chemie Humboldt-Universität zu Berlin Invalidenstrasse 42 10099 Berlin, Germany

\*Corresponding author.

E-mail address: [piotrp@amu.edu.pl](mailto:piotrp@amu.edu.pl) (P. Przybylski).

### Contents:

|                                                                                                                                                                                                                                                                                                                                                                                                                                                                                                            |    |
|------------------------------------------------------------------------------------------------------------------------------------------------------------------------------------------------------------------------------------------------------------------------------------------------------------------------------------------------------------------------------------------------------------------------------------------------------------------------------------------------------------|----|
| <b>Table 1S.</b> Comparison of S <sub>N</sub> 2 reaction of <b>2</b> with different bromides, performed in different reaction times and solvents, and in the presence of two types bases (inorganic NaH and organic MTBD). .....                                                                                                                                                                                                                                                                           | 7  |
| <b>Table 2S.</b> Binding energies [ $\Delta H^{\circ}_f$ (kcal/mol)] of colchicine ( <b>1</b> ), simple ether derivatives of types <b>3</b> and <b>4</b> and hybrids of types <b>7</b> and <b>8</b> to dimeric $\alpha_{GTP}/\beta$ tubulins (PDB 1SA0) <sup>1</sup> , calculated by MOG-PM6 method (Scigress package FJ 2.6, EU 3.1.9). <sup>2</sup> .....                                                                                                                                                | 8  |
| Figure 1S. Structures and the partial charges of: (a) salts formed between <b>2</b> and MTBD <i>via</i> C(10) alkoxyate (left) or <i>via</i> C(9) alkoxyate (right), and (b) salts with Na <sup>+</sup> cation where coordination sphere is fulfilled with DMF and THF solvent molecules; formed <i>via</i> C(10) alkoxyates (left) or C(9) alkoxyates (right); calculated by B88-LYP (GGA) DFT method (Scigress F.J. 2.6, EU 3.1.9., 2008-2019 Fujitsu); E units are expressed in a.u. <sup>2</sup> ..... | 9  |
| Figure 2S. Comparison FT-IR spectra of: <b>2</b> (black), 1:1 complex of 2-MTBD (red), C(9)-ether derivative <b>3f</b> (blue) and C(10)-derivative <b>4f</b> (green); in ranges: (a) 4000-400 cm <sup>-1</sup> , (b) 1800-1250 cm <sup>-1</sup> , all recorded in CH <sub>2</sub> Cl <sub>2</sub> . .....                                                                                                                                                                                                  | 10 |
| Figure 3S. Comparison FT-IR spectra of: <b>2</b> (black), 1:1 complex of 2-MTBD (red), 2-NaH (pink) and MTBD (green); in ranges: 4000-400 cm <sup>-1</sup> and 1800-1250 cm <sup>-1</sup> , <b>2</b> , 2-MTBD, MTBD recorded in CH <sub>2</sub> Cl <sub>2</sub> , 2-NaH recorded in KBr pellet.....                                                                                                                                                                                                        | 11 |
| Figure 4S. Experimentally recorded <sup>1</sup> H- <sup>13</sup> C HMBC long-range couplings within structure of hybrid <b>5f</b> , optimized by B88 LYP (GGA) DFT method (Scigress package). <sup>2</sup> .....                                                                                                                                                                                                                                                                                           | 12 |
| Figure 5S. Docking models for colchicine and its derivatives containing arms attached to C(9) or C(10) positions, at the binding pocket of tubulin dimer $\alpha_{GTP}/\beta$ (PDB 1SA0) <sup>1</sup> : (a) <b>3a</b> – pink, C(9)-substitution pattern; (b) <b>4a</b> – pink, C(10)-substitution pattern; (c) <b>3j</b> – rose, C(9)-substitution pattern; (d) <b>4j</b> - rose, C(10)-substitution                                                                                                       |    |

|                                                                                                                                                                                                                                                                                                                                                                                                                                                                                                                                   |    |
|-----------------------------------------------------------------------------------------------------------------------------------------------------------------------------------------------------------------------------------------------------------------------------------------------------------------------------------------------------------------------------------------------------------------------------------------------------------------------------------------------------------------------------------|----|
| pattern; (e) 5b – violet, C(9)-substitution pattern; (f) 6b – violet, C(10)-substitution pattern; (g) 7b – brown, C(9)-substitution pattern; (h) 8b – brown, C(10)-substitution pattern; optimized <i>via</i> MO-G PM6 semi-empirical method using MOZYME algorithm for huge molecules (Scigress package 3.1.9, 2008-2019) <sup>2</sup> . Tubulin units are distinguished by different colors: $\alpha$ -tubulin and its key amino acids (bold green sticks) and $\beta$ -tubulin and its key amino acids (blue bold sticks)..... | 13 |
| Scheme 1S. Synthesis and structure new geldanamycin derivatives (9 and 10). .....                                                                                                                                                                                                                                                                                                                                                                                                                                                 | 18 |
| Figure 6S. DFT calculated geometries (xyz coordinates) and partial charges for complexes of 2 with Na <sup>+</sup> and MTBD. ....                                                                                                                                                                                                                                                                                                                                                                                                 | 19 |
| 2(10-O <sup>-</sup> )→Na <sup>+</sup> (2DMF+3THF) .....                                                                                                                                                                                                                                                                                                                                                                                                                                                                           | 19 |
| 2(9-O <sup>-</sup> )→Na <sup>+</sup> (2DMF+2THF) .....                                                                                                                                                                                                                                                                                                                                                                                                                                                                            | 24 |
| 2(10-O <sup>-</sup> )→[H-MTBD] <sup>+</sup> .....                                                                                                                                                                                                                                                                                                                                                                                                                                                                                 | 28 |
| 2(9-O <sup>-</sup> )→[H-MTBD] <sup>+</sup> .....                                                                                                                                                                                                                                                                                                                                                                                                                                                                                  | 31 |
| <b>Figure 7S.</b> DFT calculated geometries (xyz coordinates) of <b>5f</b> . ....                                                                                                                                                                                                                                                                                                                                                                                                                                                 | 35 |
| <b>XYZ data of hybrid 5f</b> .....                                                                                                                                                                                                                                                                                                                                                                                                                                                                                                | 35 |
| <b>EXPERIMENTAL SECTION:</b> .....                                                                                                                                                                                                                                                                                                                                                                                                                                                                                                | 41 |
| <b>FT-IR spectra</b> .....                                                                                                                                                                                                                                                                                                                                                                                                                                                                                                        | 70 |
| Figure 8S. FT-IR spectrum of compound 3a (in KBr). ....                                                                                                                                                                                                                                                                                                                                                                                                                                                                           | 70 |
| Figure 9S. FT-IR spectrum of compound 3b (in KBr).....                                                                                                                                                                                                                                                                                                                                                                                                                                                                            | 71 |
| Figure 10S. FT-IR spectrum of compound 3c (in KBr).....                                                                                                                                                                                                                                                                                                                                                                                                                                                                           | 72 |
| Figure 11S. FT-IR spectrum of compound 3d (in KBr).....                                                                                                                                                                                                                                                                                                                                                                                                                                                                           | 73 |
| Figure 12S. FT-IR spectrum of compound 3e (in KBr).....                                                                                                                                                                                                                                                                                                                                                                                                                                                                           | 74 |
| Figure 13S. FT-IR spectrum of compound 3f (in CH <sub>2</sub> Cl <sub>2</sub> ). ....                                                                                                                                                                                                                                                                                                                                                                                                                                             | 75 |
| Figure 14S. FT-IR spectrum of compound 3g (in KBr).....                                                                                                                                                                                                                                                                                                                                                                                                                                                                           | 76 |
| Figure 15S. FT-IR spectrum of compound 3h (in KBr).....                                                                                                                                                                                                                                                                                                                                                                                                                                                                           | 77 |
| Figure 16S. FT-IR spectrum of compound 3i (in KBr).....                                                                                                                                                                                                                                                                                                                                                                                                                                                                           | 78 |
| Figure 17S. FT-IR spectrum of compound 3j (in KBr).....                                                                                                                                                                                                                                                                                                                                                                                                                                                                           | 79 |
| Figure 18S. FT-IR spectrum of compound 4a (in KBr).....                                                                                                                                                                                                                                                                                                                                                                                                                                                                           | 80 |
| Figure 19S. FT-IR spectrum of compound 4b (in KBr).....                                                                                                                                                                                                                                                                                                                                                                                                                                                                           | 81 |
| Figure 20S. FT-IR spectrum of compound 4c (in KBr).....                                                                                                                                                                                                                                                                                                                                                                                                                                                                           | 82 |
| Figure 21S. FT-IR spectrum of compound 4d (in KBr).....                                                                                                                                                                                                                                                                                                                                                                                                                                                                           | 83 |
| Figure 22S. FT-IR spectrum of compound 4e (in KBr).....                                                                                                                                                                                                                                                                                                                                                                                                                                                                           | 84 |
| Figure 23S. FT-IR spectrum of compound 4f (in CH <sub>2</sub> Cl <sub>2</sub> ). ....                                                                                                                                                                                                                                                                                                                                                                                                                                             | 85 |
| Figure 24S. FT-IR spectrum of compound 4g (in KBr).....                                                                                                                                                                                                                                                                                                                                                                                                                                                                           | 86 |
| Figure 25S. FT-IR spectrum of compound 4h (in KBr).....                                                                                                                                                                                                                                                                                                                                                                                                                                                                           | 87 |
| Figure 26S. FT-IR spectrum of compound 4i (in KBr).....                                                                                                                                                                                                                                                                                                                                                                                                                                                                           | 88 |

|                                                                                     |            |
|-------------------------------------------------------------------------------------|------------|
| Figure 27S. FT-IR spectrum of compound 4j (in KBr).....                             | 89         |
| Figure 28S. FT-IR spectrum of compound 5a (in KBr).....                             | 90         |
| Figure 29S. FT-IR spectrum of compound 5b (in KBr).....                             | 91         |
| Figure 30S. FT-IR spectrum of compound 5c (in KBr).....                             | 92         |
| Figure 31S. FT-IR spectrum of compound 5d (in KBr).....                             | 93         |
| Figure 32S. FT-IR spectrum of compound 5e (in KBr).....                             | 94         |
| Figure 33S. FT-IR spectrum of compound 5f (in KBr). .....                           | 95         |
| Figure 34S. FT-IR spectrum of compound 6a (in KBr).....                             | 96         |
| Figure 35S. FT-IR spectrum of compound 6b (in KBr).....                             | 97         |
| Figure 36S. FT-IR spectrum of compound 6c (in KBr).....                             | 98         |
| Figure 37S. FT-IR spectrum of compound 6d (in KBr).....                             | 99         |
| Figure 38S. FT-IR spectrum of compound 6e (in KBr).....                             | 100        |
| Figure 39S. FT-IR spectrum of compound 6f (in KBr). .....                           | 101        |
| Figure 40S. FT-IR spectrum of compound 7a (in KBr).....                             | 102        |
| Figure 41S. FT-IR spectrum of compound 7b (in KBr).....                             | 103        |
| Figure 42S. FT-IR spectrum of compound 7c (in KBr).....                             | 104        |
| Figure 43S. FT-IR spectrum of compound 7d (in KBr).....                             | 105        |
| Figure 44S. FT-IR spectrum of compound 8a (in KBr).....                             | 106        |
| Figure 45S. FT-IR spectrum of compound 8b (in KBr).....                             | 107        |
| Figure 46S. FT-IR spectrum of compound 8c (in KBr).....                             | 108        |
| Figure 47S. FT-IR spectrum of compound 8d (in KBr).....                             | 109        |
| Figure 48S. FT-IR spectrum of compound 9 (in KBr).....                              | 110        |
| Figure 49S. FT-IR spectrum of compound 10 (in KBr).....                             | 111        |
| <b>NMR spectra</b> .....                                                            | <b>112</b> |
| Figure 50S. <sup>1</sup> H NMR spectrum of compound 3a in CDCl <sub>3</sub> .....   | 113        |
| Figure 51S. <sup>13</sup> C NMR spectrum of compound 3a in CDCl <sub>3</sub> .....  | 114        |
| Figure 52S. <sup>1</sup> H NMR spectrum of compound 3b in CDCl <sub>3</sub> . ..... | 115        |
| Figure 53S. <sup>13</sup> C NMR spectrum of compound 3b in CDCl <sub>3</sub> .....  | 116        |
| Figure 54S. <sup>1</sup> H NMR spectrum of compound 3c in CDCl <sub>3</sub> .....   | 117        |
| Figure 55S. <sup>1</sup> H NMR spectrum of compound 3c in CDCl <sub>3</sub> .....   | 118        |
| Figure 56S. <sup>1</sup> H NMR spectrum of compound 3d in CDCl <sub>3</sub> . ..... | 119        |
| Figure 57S. <sup>1</sup> H NMR spectrum of compound 3d in CDCl <sub>3</sub> . ..... | 120        |
| Figure 58S. <sup>1</sup> H NMR spectrum of compound 3e in CDCl <sub>3</sub> .....   | 121        |
| Figure 59S. <sup>13</sup> C NMR spectrum of compound 3e in CDCl <sub>3</sub> .....  | 122        |

|                                                                              |     |
|------------------------------------------------------------------------------|-----|
| Figure 60S. $^1\text{H}$ NMR spectrum of compound 3f in $\text{CDCl}_3$ .    | 123 |
| Figure 61S. $^{13}\text{C}$ NMR spectrum of compound 3f in $\text{CDCl}_3$ . | 124 |
| Figure 62S. $^1\text{H}$ NMR spectrum of compound 3g in $\text{CDCl}_3$ .    | 125 |
| Figure 63S. $^{13}\text{C}$ NMR spectrum of compound 3g in $\text{CDCl}_3$ . | 126 |
| Figure 64S. $^1\text{H}$ NMR spectrum of compound 3h in $\text{CDCl}_3$ .    | 127 |
| Figure 65S. $^{13}\text{C}$ NMR spectrum of compound 3h in $\text{CDCl}_3$ . | 128 |
| Figure 66S. $^1\text{H}$ NMR spectrum of compound 3i in $\text{CDCl}_3$ .    | 129 |
| Figure 67S. $^{13}\text{C}$ NMR spectrum of compound 3i in $\text{CDCl}_3$ . | 130 |
| Figure 68S. $^1\text{H}$ NMR spectrum of compound 3j in $\text{CDCl}_3$ .    | 131 |
| Figure 69S. $^{13}\text{C}$ NMR spectrum of compound 3j in $\text{CDCl}_3$ . | 132 |
| Figure 70S. $^1\text{H}$ NMR spectrum of compound 4a in $\text{CDCl}_3$ .    | 133 |
| Figure 71S. $^{13}\text{C}$ NMR spectrum of compound 4a in $\text{CDCl}_3$ . | 134 |
| Figure 72S. $^1\text{H}$ NMR spectrum of compound 4b in $\text{CDCl}_3$ .    | 135 |
| Figure 73S. $^{13}\text{C}$ NMR spectrum of compound 4b in $\text{CDCl}_3$ . | 136 |
| Figure 74S. $^1\text{H}$ NMR spectrum of compound 4c in $\text{CDCl}_3$ .    | 137 |
| Figure 75S. $^{13}\text{C}$ NMR spectrum of compound 4c in $\text{CDCl}_3$ . | 138 |
| Figure 76S. $^1\text{H}$ NMR spectrum of compound 4d in $\text{CDCl}_3$ .    | 139 |
| Figure 77S. $^{13}\text{C}$ NMR spectrum of compound 4d in $\text{CDCl}_3$ . | 140 |
| Figure 78S. $^1\text{H}$ NMR spectrum of compound 4e in $\text{CDCl}_3$ .    | 141 |
| Figure 79S. $^{13}\text{C}$ NMR spectrum of compound 4e in $\text{CDCl}_3$ . | 142 |
| Figure 80S. $^1\text{H}$ NMR spectrum of compound 4f in $\text{CDCl}_3$ .    | 143 |
| Figure 81S. $^{13}\text{C}$ NMR spectrum of compound 4f in $\text{CDCl}_3$ . | 144 |
| Figure 82S. $^1\text{H}$ NMR spectrum of compound 4g in $\text{CDCl}_3$ .    | 145 |
| Figure 83S. $^{13}\text{C}$ NMR spectrum of compound 4g in $\text{CDCl}_3$ . | 146 |
| Figure 84S. $^1\text{H}$ NMR spectrum of compound 4h in $\text{CDCl}_3$ .    | 147 |
| Figure 85S. $^{13}\text{C}$ NMR spectrum of compound 4h in $\text{CDCl}_3$ . | 148 |
| Figure 86S. $^1\text{H}$ NMR spectrum of compound 4i in $\text{CDCl}_3$ .    | 149 |
| Figure 87S. $^{13}\text{C}$ NMR spectrum of compound 4i in $\text{CDCl}_3$ . | 150 |
| Figure 88S. $^1\text{H}$ NMR spectrum of compound 4j in $\text{CDCl}_3$ .    | 151 |
| Figure 89S. $^{13}\text{C}$ NMR spectrum of compound 4j in $\text{CDCl}_3$ . | 152 |
| Figure 90S. $^1\text{H}$ NMR spectrum of compound 5a in $\text{CDCl}_3$ .    | 153 |
| Figure 91S. $^{13}\text{C}$ NMR spectrum of compound 5a in $\text{CDCl}_3$ . | 154 |
| Figure 92S. $^1\text{H}$ NMR spectrum of compound 5b in $\text{CDCl}_3$ .    | 155 |
| Figure 93S. $^{13}\text{C}$ NMR spectrum of compound 5b in $\text{CDCl}_3$ . | 156 |

|                                                                                    |     |
|------------------------------------------------------------------------------------|-----|
| Figure 94S. $^1\text{H}$ NMR spectrum of compound 5c in $\text{CDCl}_3$ .....      | 157 |
| Figure 95S. $^{13}\text{C}$ NMR spectrum of compound 5c in $\text{CDCl}_3$ .....   | 158 |
| Figure 96S. $^1\text{H}$ NMR spectrum of compound 5d in $\text{CDCl}_3$ . ....     | 159 |
| Figure 97S. $^{13}\text{C}$ NMR spectrum of compound 5d in $\text{CDCl}_3$ . ....  | 160 |
| Figure 98S. $^1\text{H}$ NMR spectrum of compound 5e in $\text{CDCl}_3$ .....      | 161 |
| Figure 99S. $^{13}\text{C}$ NMR spectrum of compound 5e in $\text{CDCl}_3$ .....   | 162 |
| Figure 100S. ESI $\text{MS}^+$ spectrum of 5e. ....                                | 163 |
| Figure 101S. $^1\text{H}$ NMR spectrum of compound 5f in $\text{CDCl}_3$ . ....    | 164 |
| Figure 102S. $^{13}\text{C}$ NMR spectrum of compound 5f in $\text{CDCl}_3$ . .... | 165 |
| Figure 103S. $^1\text{H}$ NMR spectrum of compound 6a in $\text{CDCl}_3$ .....     | 166 |
| Figure 104S. $^{13}\text{C}$ NMR spectrum of compound 6a in $\text{CDCl}_3$ .....  | 167 |
| Figure 105S. $^1\text{H}$ NMR spectrum of compound 6b in $\text{CDCl}_3$ . ....    | 168 |
| Figure 106S. $^{13}\text{C}$ NMR spectrum of compound 6b in $\text{CDCl}_3$ . .... | 169 |
| Figure 107S. $^1\text{H}$ NMR spectrum of compound 6c in $\text{CDCl}_3$ .....     | 170 |
| Figure 108S. $^{13}\text{C}$ NMR spectrum of compound 6c in $\text{CDCl}_3$ .....  | 171 |
| Figure 109S. $^1\text{H}$ NMR spectrum of compound 6d in $\text{CDCl}_3$ . ....    | 172 |
| Figure 110S. $^{13}\text{C}$ NMR spectrum of compound 6d in $\text{CDCl}_3$ . .... | 173 |
| Figure 111S. $^1\text{H}$ NMR spectrum of compound 6e in $\text{CDCl}_3$ .....     | 174 |
| Figure 112S. $^{13}\text{C}$ NMR spectrum of compound 6e in $\text{CDCl}_3$ .....  | 175 |
| Figure 113S. ESI $\text{MS}^+$ spectrum of 6e. ....                                | 176 |
| Figure 114S. $^1\text{H}$ NMR spectrum of compound 6f in $\text{CDCl}_3$ . ....    | 177 |
| Figure 115S. $^{13}\text{C}$ NMR spectrum of compound 6f in $\text{CDCl}_3$ .....  | 178 |
| Figure 116S. $^1\text{H}$ NMR spectrum of compound 7a in $\text{CDCl}_3$ .....     | 179 |
| Figure 117S. $^{13}\text{C}$ NMR spectrum of compound 7a in $\text{CDCl}_3$ .....  | 180 |
| Figure 118S. $^1\text{H}$ NMR spectrum of compound 7b in $\text{CDCl}_3$ . ....    | 181 |
| Figure 119S. $^{13}\text{C}$ NMR spectrum of compound 7b in $\text{CDCl}_3$ . .... | 182 |
| Figure 120S. $^1\text{H}$ NMR spectrum of compound 7c in $\text{CDCl}_3$ .....     | 183 |
| Figure 121S. $^{13}\text{C}$ NMR spectrum of compound 7c in $\text{CDCl}_3$ .....  | 184 |
| Figure 122S. $^1\text{H}$ NMR spectrum of compound 7d in $\text{CDCl}_3$ . ....    | 185 |
| Figure 123S. $^{13}\text{C}$ NMR spectrum of compound 7d in $\text{CDCl}_3$ . .... | 186 |
| Figure 124S. $^1\text{H}$ NMR spectrum of compound 8a in $\text{CDCl}_3$ .....     | 187 |
| Figure 125S. $^{13}\text{C}$ NMR spectrum of compound 8a in $\text{CDCl}_3$ .....  | 188 |
| Figure 126S. $^1\text{H}$ NMR spectrum of compound 8b in $\text{CDCl}_3$ . ....    | 189 |
| Figure 127S. $^{13}\text{C}$ NMR spectrum of compound 8b in $\text{CDCl}_3$ . .... | 190 |

|                                                                                                                   |     |
|-------------------------------------------------------------------------------------------------------------------|-----|
| Figure 128S. $^1\text{H}$ NMR spectrum of compound 8c in $\text{CDCl}_3$ .....                                    | 191 |
| Figure 129S. $^{13}\text{C}$ NMR spectrum of compound 8c in $\text{CDCl}_3$ .....                                 | 192 |
| Figure 130S. $^1\text{H}$ NMR spectrum of compound 8d in $\text{CDCl}_3$ . ....                                   | 193 |
| Figure 131S. $^{13}\text{C}$ NMR spectrum of compound 8d in $\text{CDCl}_3$ . ....                                | 194 |
| Figure 132S. $^1\text{H}$ NMR spectrum of compound 9 in $\text{CDCl}_3$ . ....                                    | 195 |
| Figure 133S. $^{13}\text{C}$ NMR spectrum of compound 9 in $\text{CDCl}_3$ . ....                                 | 196 |
| Figure 134S. $^1\text{H}$ NMR spectrum of compound 10 in $\text{CDCl}_3$ . ....                                   | 197 |
| Figure 135S. $^{13}\text{C}$ NMR spectrum of compound 10 in $\text{CDCl}_3$ . ....                                | 198 |
| <b>Figure 136S.</b> Structures of all novel chemical entities <b>3a-3j</b> presented in ChemDraw 12.0 format..... | 199 |
| <b>Figure 137S.</b> Structures of all novel chemical entities <b>4a-4j</b> presented in ChemDraw 12.0 format..... | 200 |
| <b>Figure 138S.</b> Structures of all novel chemical entities <b>5a-5f</b> presented in ChemDraw 12.0 format..... | 201 |
| <b>Figure 139S.</b> Structures of all novel chemical entities <b>6a-6f</b> presented in ChemDraw 12.0 format..... | 202 |
| <b>Figure 140S.</b> Structures of all novel chemical entities <b>7a-7d</b> presented in ChemDraw 12.0 format..... | 203 |
| <b>Figure 141S.</b> Structures of all novel chemical entities <b>8a-8d</b> presented in ChemDraw 12.0 format..... | 204 |

**Table 1S.** Comparison of S<sub>N</sub>2 reaction of **2** with different bromides, performed in different reaction times and solvents, and in the presence of two types bases (inorganic NaH and organic MTBD).

| S <sub>N</sub> 2 reactant | Base | Solvent         | Reaction time (h) | T (°C) | Convers. of <b>1</b> (%) | Yield (%) of ( <b>3</b> + <b>4</b> ) | Ratio (%) of ( <b>3</b> : <b>4</b> ) |
|---------------------------|------|-----------------|-------------------|--------|--------------------------|--------------------------------------|--------------------------------------|
| BnBr                      | NaH  | DMF             | 4                 | 70     | 91.3                     | 87.3( <b>3a</b> + <b>4a</b> )        | 59.8:40.2 ( <b>3a</b> : <b>4a</b> )  |
| BnBr                      | NaH  | THF/DMF (1:0.5) | 4                 | 70     | 95.1                     | 95.1( <b>3a</b> + <b>4a</b> )        | 68.3:31.7 ( <b>3a</b> : <b>4a</b> )  |
| 4-iodo-BnBr               | NaH  | THF/DMF (1:0.5) | 4                 | 70     | 84.1                     | 83.6( <b>3b</b> + <b>4b</b> )        | 71.5:28.5 ( <b>3b</b> : <b>4b</b> )  |
| Cinnamyl-Br               | NaH  | THF/DMF (1:0.5) | 4                 | 70     | 93.7                     | 91.3( <b>3c</b> + <b>4c</b> )        | 77.2:22.8 ( <b>3c</b> : <b>4c</b> )  |
| Allyl-Br                  | NaH  | THF/DMF (1:0.5) | 4                 | 70     | 95.1                     | 94.8( <b>3d</b> + <b>4d</b> )        | 69.3:30.7 ( <b>3d</b> : <b>4d</b> )  |
| Crotyl-Br                 | NaH  | THF/DMF (1:0.5) | 4                 | 70     | 95.7                     | 95.0( <b>3e</b> + <b>4e</b> )        | 68.7:31.3 ( <b>3e</b> : <b>4e</b> )  |
| Propargyl-Br              | NaH  | THF/DMF (1:0.5) | 4                 | 70     | 66.3                     | 65.5( <b>3f</b> + <b>4f</b> )        | 64.4:35.6 ( <b>3f</b> : <b>4f</b> )  |
| Ethyl-Br acetate          | NaH  | THF/DMF (1:0.5) | 4                 | 70     | 97.3                     | 92.6( <b>3g</b> + <b>4g</b> )        | 66.8:33.2 ( <b>3g</b> : <b>4g</b> )  |
| BnBr                      | MTBD | Toluene         | 1                 | 70     | 95.5                     | 99.5( <b>3a</b> + <b>4a</b> )        | 28.6:71.4 ( <b>3a</b> : <b>4a</b> )  |
| 4-iodo-BnBr               | MTBD | Toluene         | 1                 | 70     | 98.7                     | 98.1( <b>3b</b> + <b>4b</b> )        | 33.6:66.4 ( <b>3b</b> : <b>4b</b> )  |
| Cinnamyl-Br               | MTBD | Toluene         | 1                 | 70     | 99.4                     | 99.3( <b>3c</b> + <b>4c</b> )        | 34.6:65.4 ( <b>3c</b> : <b>4c</b> )  |
| Allyl-Br                  | MTBD | Toluene         | 1                 | 70     | 98.6                     | 97.8( <b>3d</b> + <b>4d</b> )        | 29.6:70.4 ( <b>3d</b> : <b>4d</b> )  |
| Crotyl-Br                 | MTBD | Toluene         | 1                 | 70     | 90.0                     | 96.6( <b>3e</b> + <b>4e</b> )        | 35.7:64.3 ( <b>3e</b> : <b>4e</b> )  |
| Propargyl-Br              | MTBD | Toluene         | 1                 | 70     | 95.6                     | 95.5( <b>3f</b> + <b>4f</b> )        | 29.8:70.2 ( <b>3f</b> : <b>4f</b> )  |
| Ethyl-Br acetate          | MTBD | Toluene         | 1                 | 70     | 90.1                     | 89.6( <b>3g</b> + <b>4g</b> )        | 27.6:72.4 ( <b>3g</b> : <b>4g</b> )  |

**Table 2S.** Binding energies [ $\Delta H^\circ_f$  (kcal/mol)] of colchicine (**1**), simple ether derivatives of types **3** and **4** and hybrids of types **7** and **8** to dimeric  $\alpha_{\text{GTP}}/\beta$  tubulins (PDB 1SA0)<sup>1</sup>, calculated by MOG-PM6 method (Scigress package FJ 2.6, EU 3.1.9).<sup>2</sup>

| <b>Compound</b> <sup>[substitution]</sup> | $\Delta H^\circ_f$ [kcal/mol] |
|-------------------------------------------|-------------------------------|
| <b>1</b> <sup>(C10)</sup> (Fig1a)         | -149.72                       |
| <b>3a</b> <sup>(C9)</sup> (Fig S1a)       | -123.82                       |
| <b>4a</b> <sup>(C10)</sup> (Fig S1b)      | -121.95                       |
| <b>3e</b> <sup>(C9)</sup> (Fig1b)         | -159.18                       |
| <b>4e</b> <sup>(C10)</sup> (Fig1c)        | -146.11                       |
| <b>3f</b> <sup>(C9)</sup> (Fig1d)         | -150.11                       |
| <b>4f</b> <sup>(C10)</sup> (Fig1e)        | -147.80                       |
| <b>3j</b> <sup>(C9)</sup> (Fig S1c)       | -112.92                       |
| <b>4j</b> <sup>(C10)</sup> (Fig S1d)      | -119.37                       |
| <b>5b</b> <sup>(C9)</sup> (Fig S1e)       | -122.79                       |
| <b>6b</b> <sup>(C10)</sup> (Fig S1f)      | -119.01                       |
| <b>7a</b> <sup>(C9)</sup> (Fig 2a)        | -102.64                       |
| <b>8a</b> <sup>(C10)</sup> (Fig 2b)       | -91.53                        |
| <b>7b</b> <sup>(C9)</sup> (Fig S1g)       | -120.27                       |
| <b>8b</b> <sup>(C10)</sup> (Fig S1h)      | -118.98                       |
| <b>7c</b> <sup>(C9)</sup> (Fig 2c)        | -142.75                       |
| <b>8c</b> <sup>(C10)</sup> (Fig 2d)       | -139.16                       |



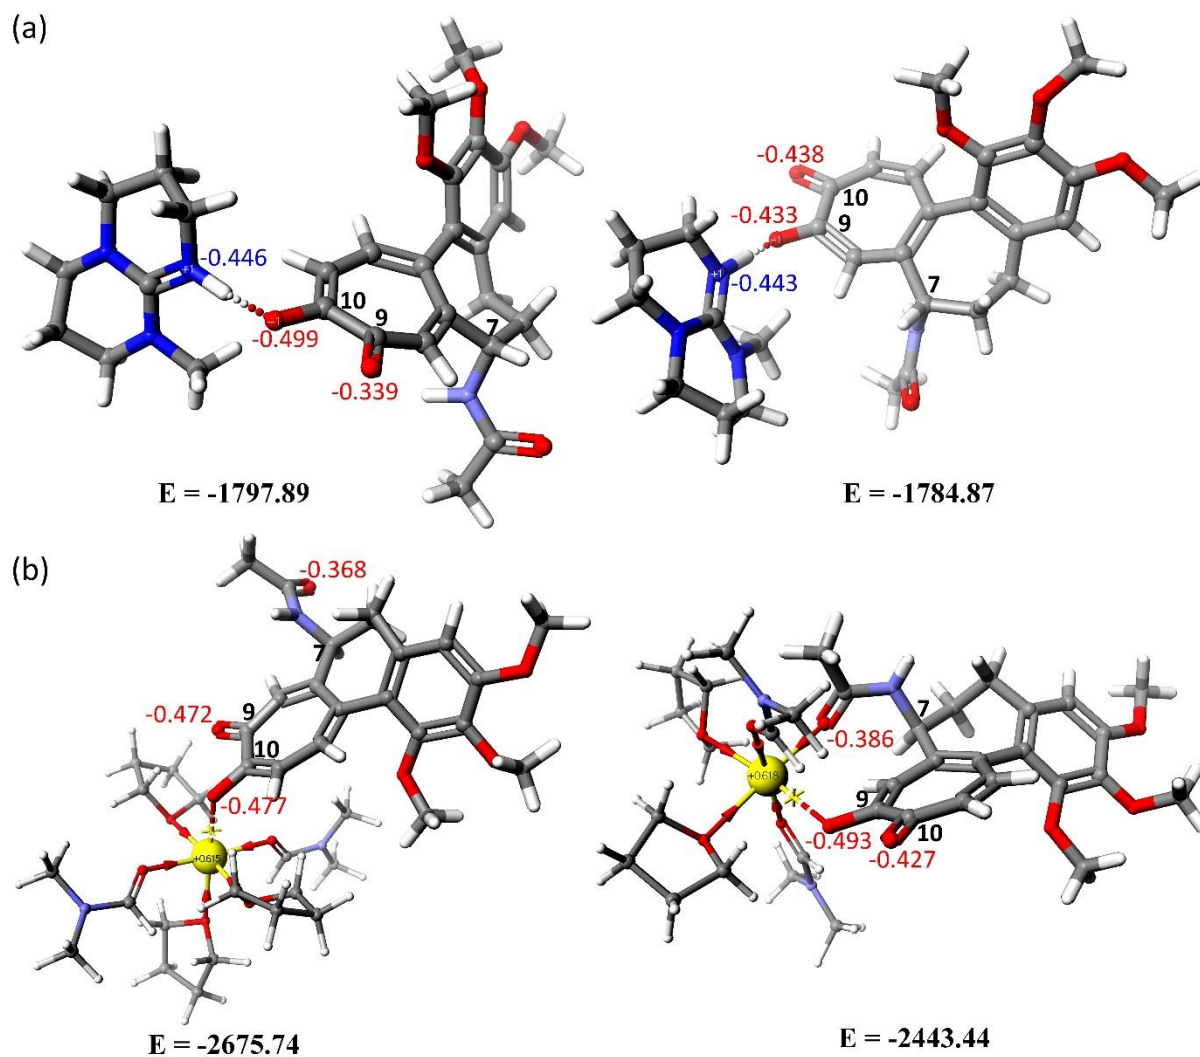

**Figure 1S.** Structures and the partial charges of: (a) salts formed between **2** and MTBD *via* C(10) alkoxyate (left) or *via* C(9) alkoxyate (right), and (b) salts with Na<sup>+</sup> cation where coordination sphere is fulfilled with DMF and THF solvent molecules; formed *via* C(10) alkoxyates (left) or C(9) alkoxyates (right); calculated by B88-LYP (GGA) DFT method (*Scigress F.J. 2.6, EU 3.1.9., 2008-2019 Fujitsu*); E units are expressed in a.u.<sup>2</sup>

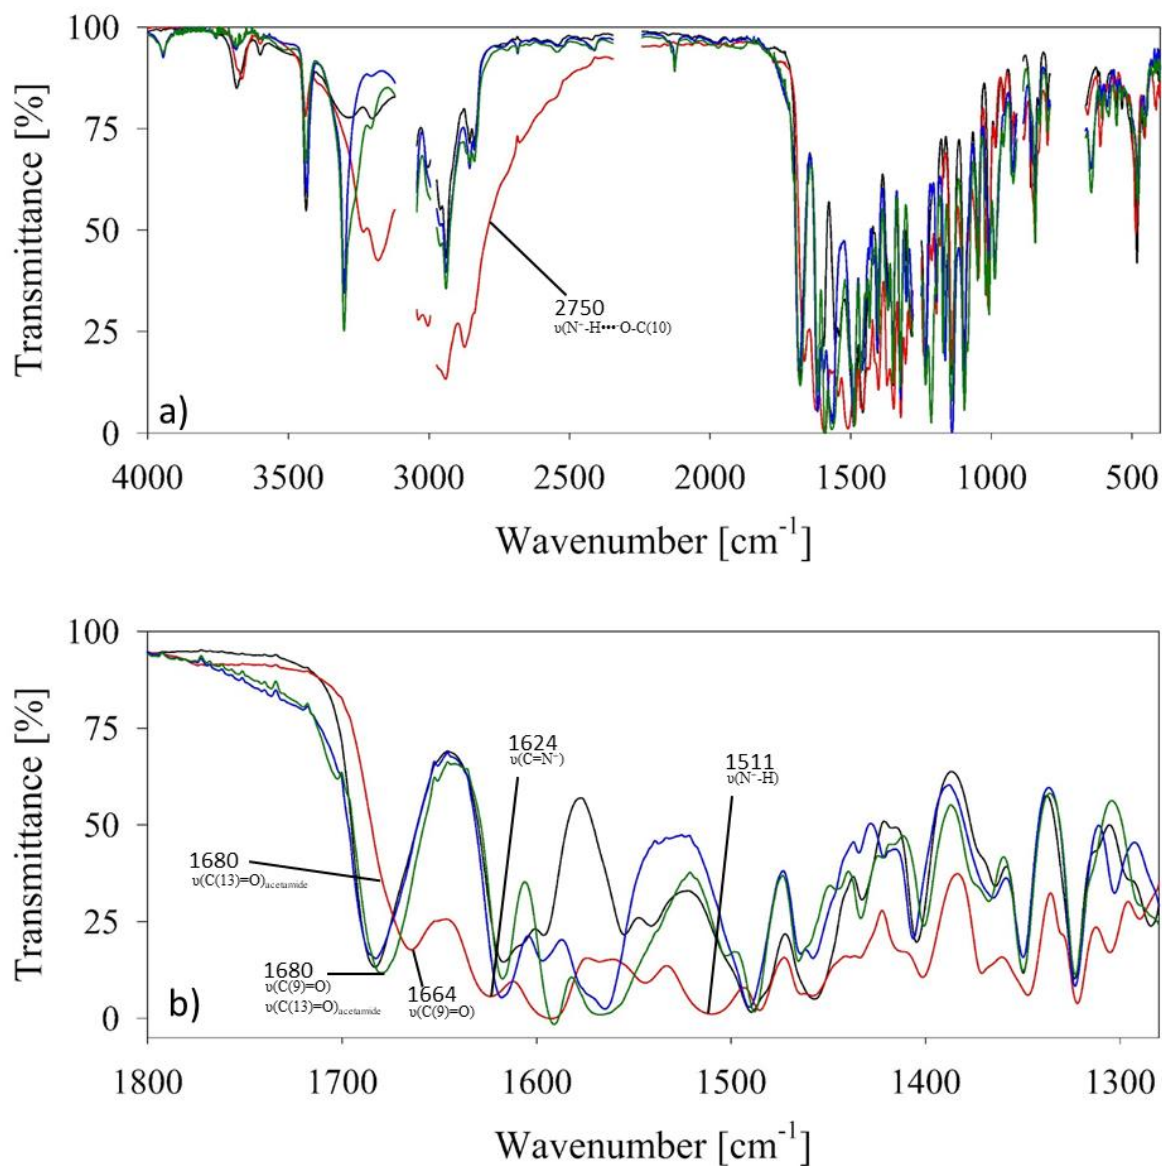

**Figure 2S.** Comparison FT-IR spectra of: **2** (black), 1:1 complex of **2-MTBD** (red), C(9)-ether derivative **3f** (blue) and C(10)-derivative **4f** (green); in ranges: (a) 4000-400  $\text{cm}^{-1}$ , (b) 1800-1250  $\text{cm}^{-1}$ , all recorded in  $\text{CH}_2\text{Cl}_2$ .

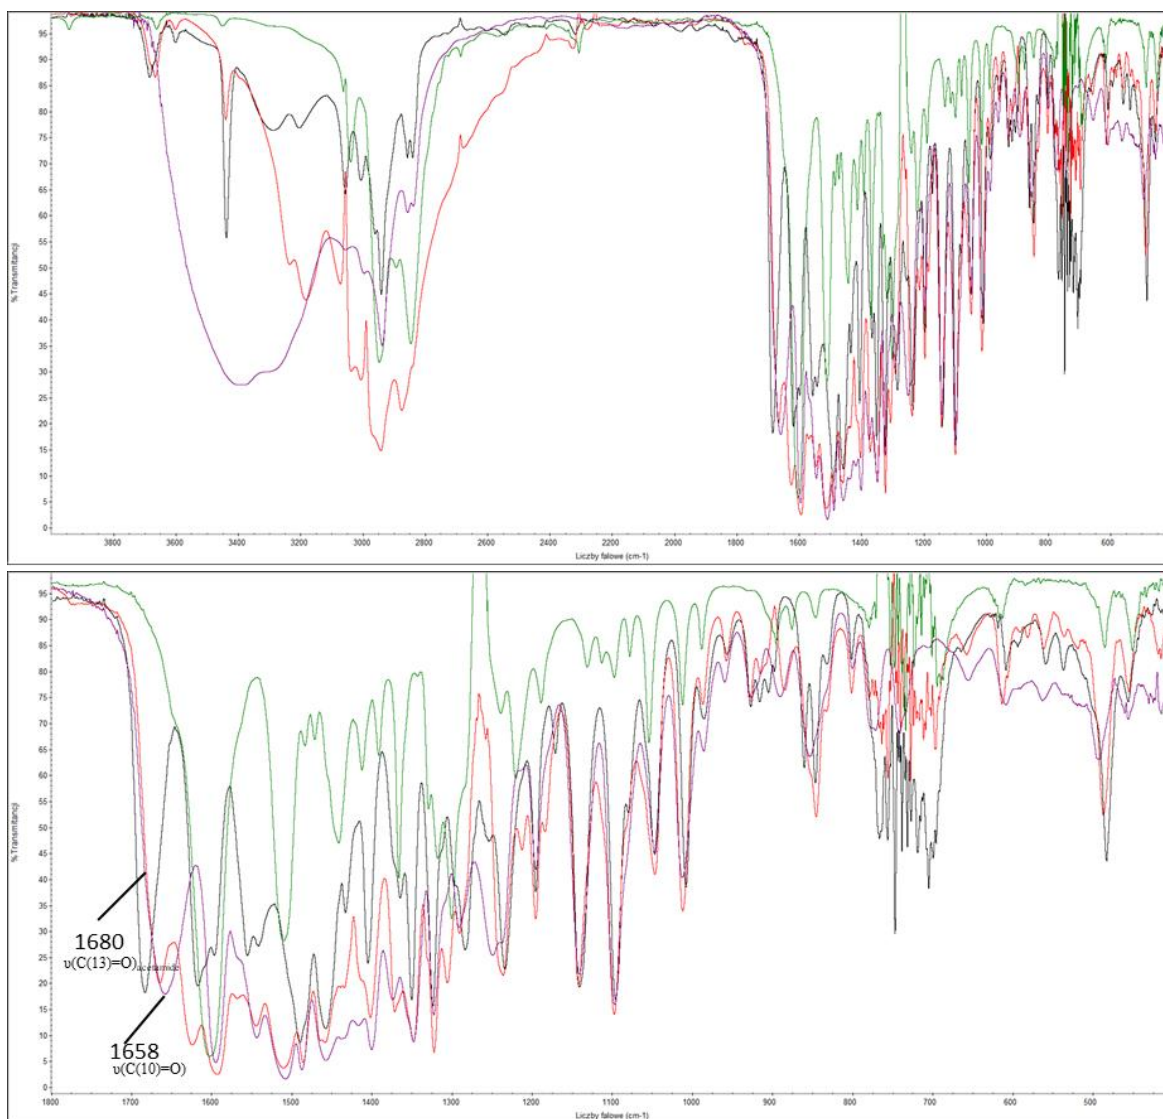

**Figure 3S.** Comparison FT-IR spectra of: **2** (black), 1:1 complex of **2**-MTBD (red), **2**-NaH (pink) and MTBD (green); in ranges: 4000-400  $\text{cm}^{-1}$  and 1800-1250  $\text{cm}^{-1}$ , **2**, **2**-MTBD, MTBD recorded in  $\text{CH}_2\text{Cl}_2$ , **2**-NaH recorded in KBr pellet.

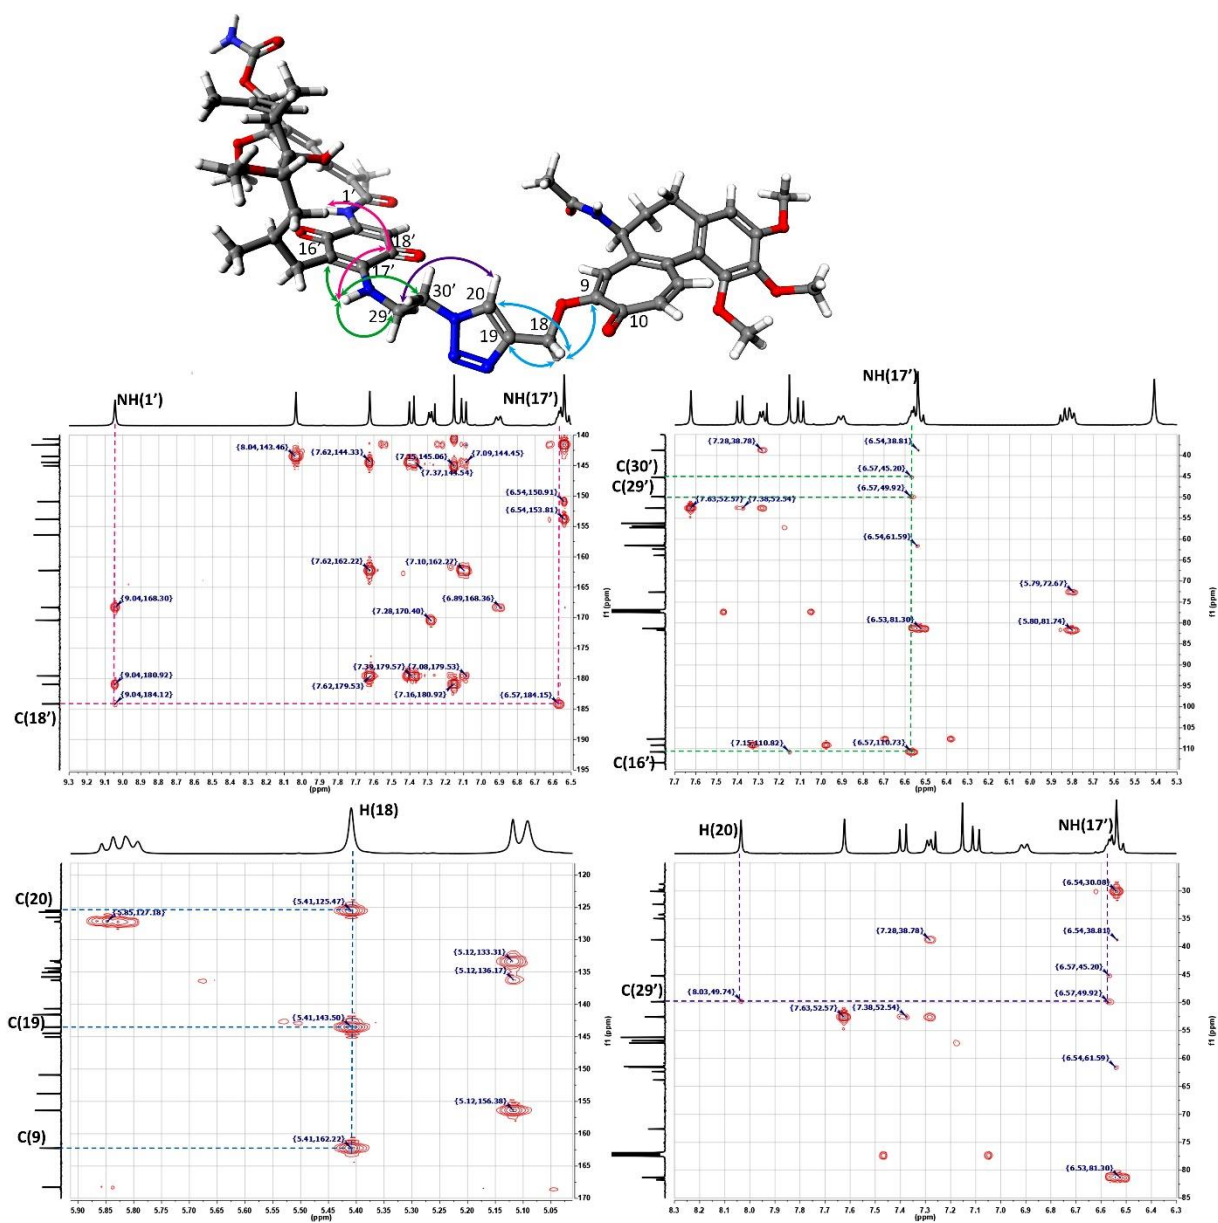

**Figure 4S.** Experimentally recorded  $^1\text{H}$ - $^{13}\text{C}$  HMBC long-range couplings within structure of hybrid **5f**, optimized by B88 LYP (GGA) DFT method (*Scigress* package).<sup>2</sup>

**Figure 5S.** Docking models for colchicine and its derivatives containing arms attached to C(9) or C(10) positions, at the binding pocket of tubulin dimer  $\alpha$ GTP/ $\beta$  (PDB 1SA0)<sup>1</sup>: (a) **3a** – pink, C(9)-substitution pattern; (b) **4a** – pink, C(10)-substitution pattern; (c) **3j** – rose, C(9)-substitution pattern; (d) **4j** – rose, C(10)-substitution pattern; (e) **5b** – violet, C(9)-substitution pattern; (f) **6b** – violet, C(10)-substitution pattern; (g) **7b** – brown, C(9)-substitution pattern; (h) **8b** – brown, C(10)-substitution pattern; optimized *via* MO-G PM6 semi-empirical method using MOZYME algorithm for huge molecules (Scigress package 3.1.9, 2008-2019)<sup>2</sup>. Tubulin units are distinguished by different colors:  $\alpha$ -tubulin and its key amino acids (bold green sticks) and  $\beta$ -tubulin and its key amino acids (blue bold sticks).

a) **3a** -  $\alpha$ <sub>GTP</sub>/ $\beta$

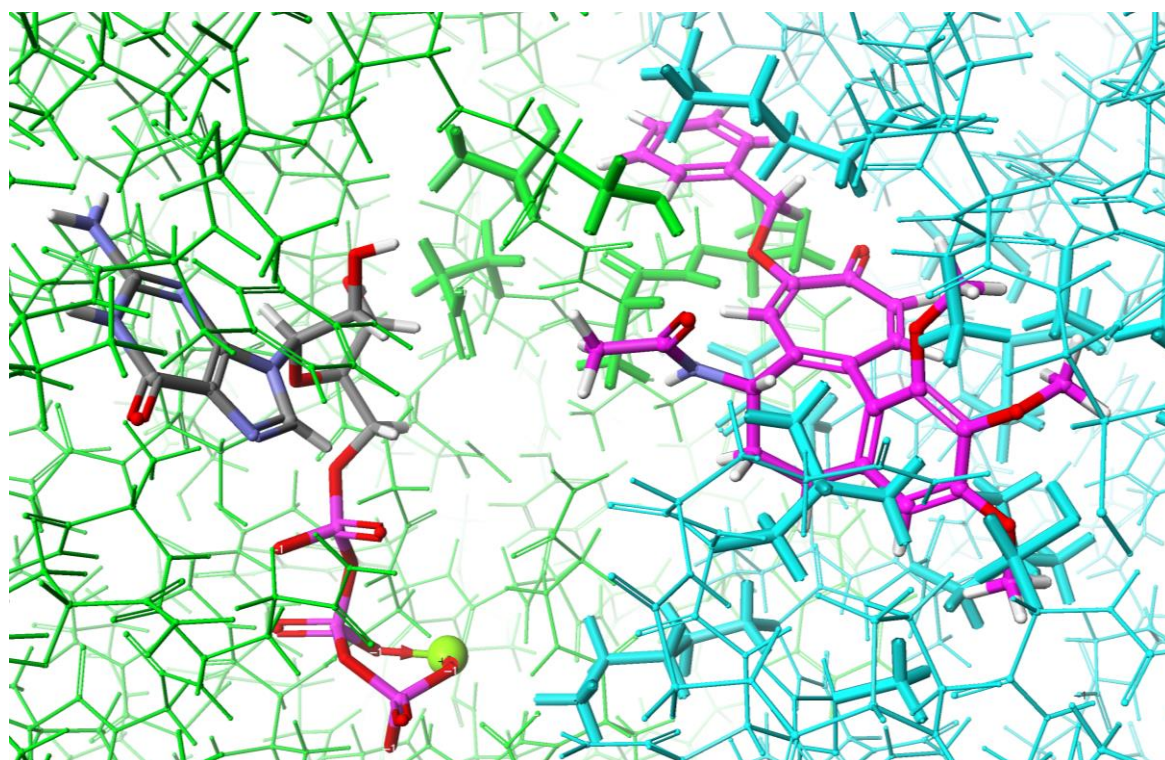

b) **4a** -  $\alpha_{\text{GTP}}/\beta$

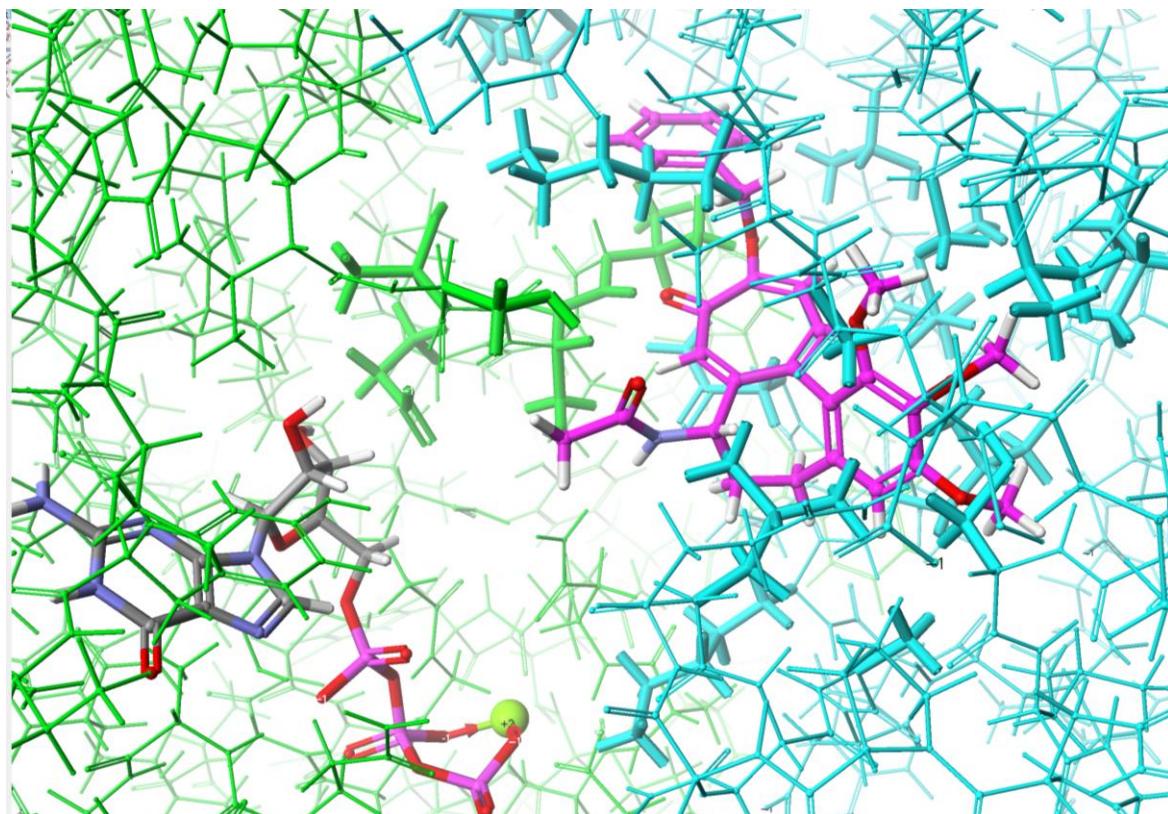

c) **3j** -  $\alpha_{\text{GTP}}/\beta$

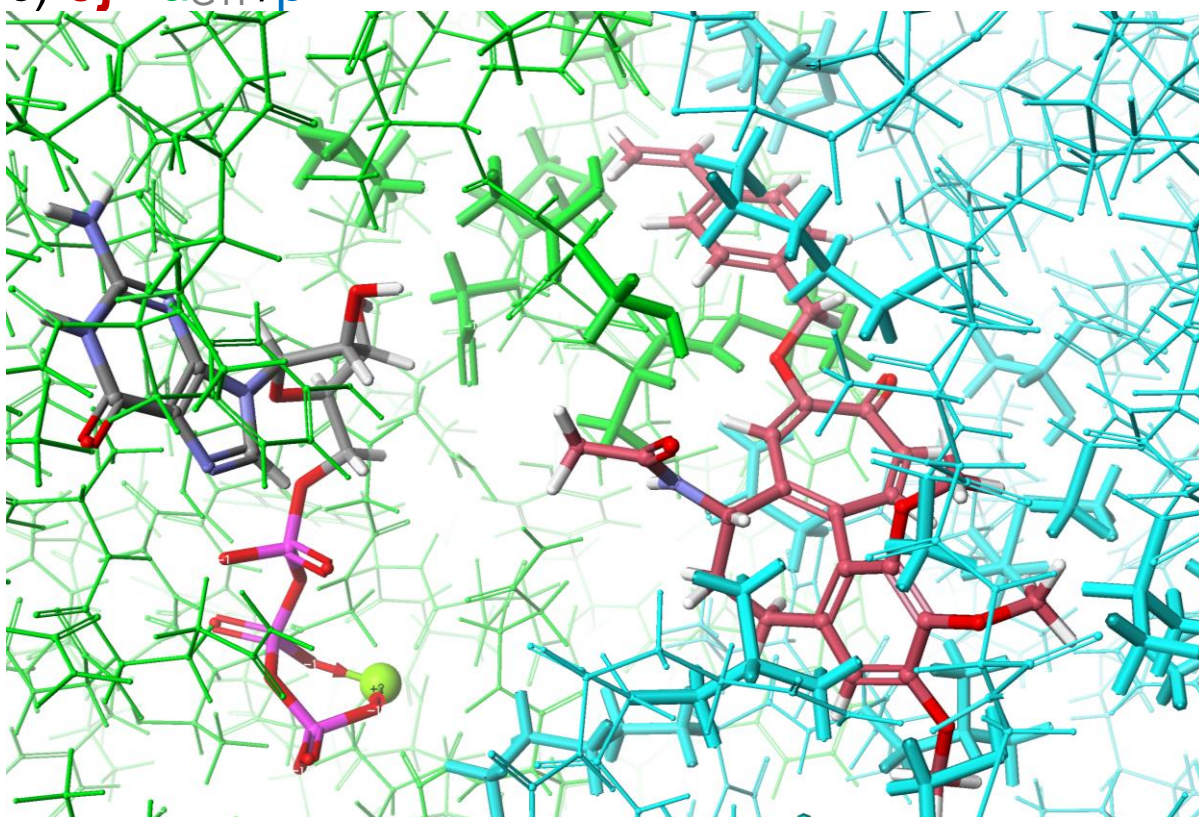

d) **4j** -  $\alpha_{\text{GTP}}/\beta$

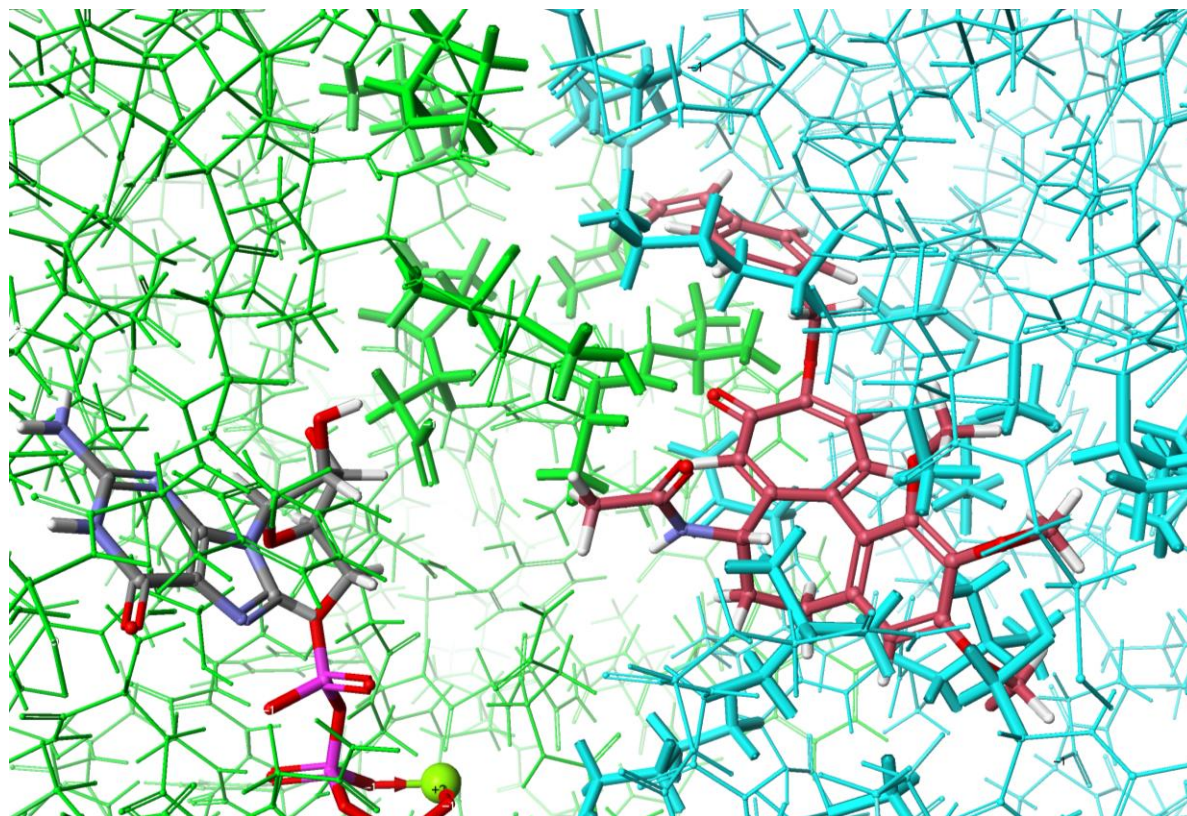

e) **5b** -  $\alpha_{\text{GTP}}/\beta$

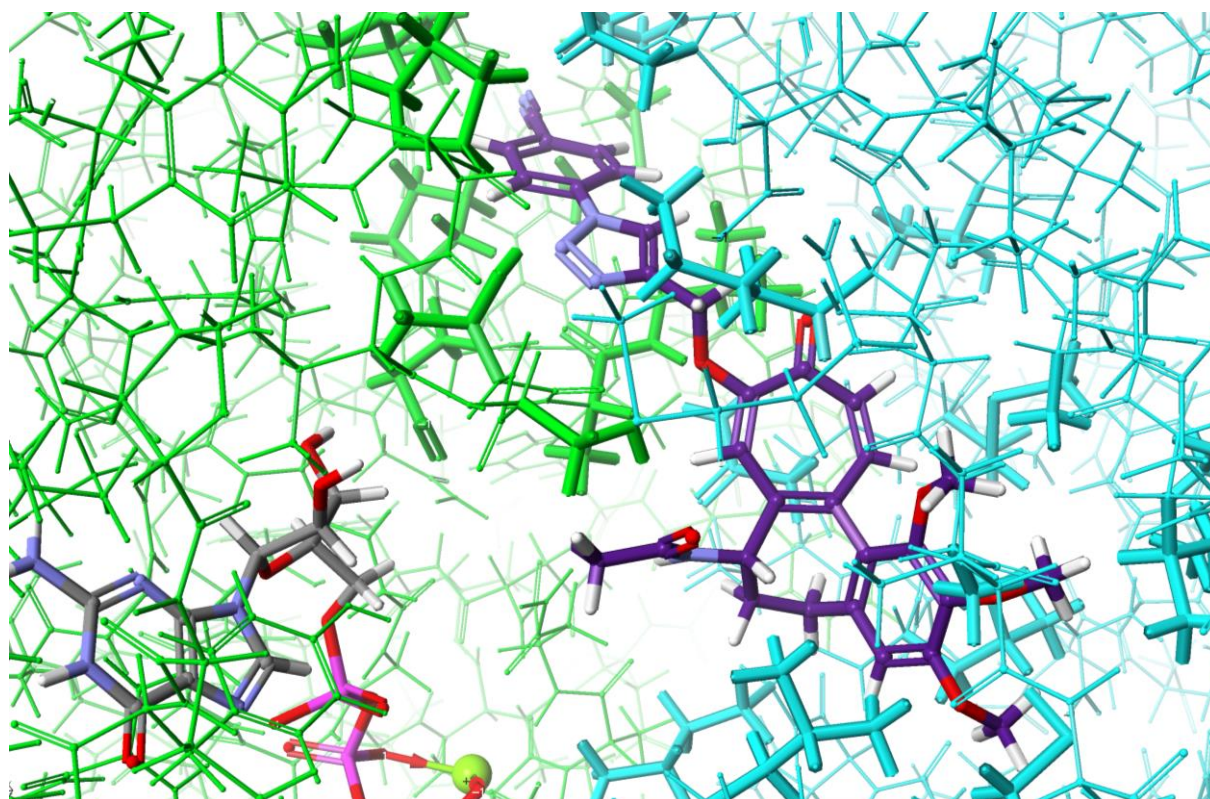

f) **6b** -  $\alpha_{\text{GTP}}/\beta$

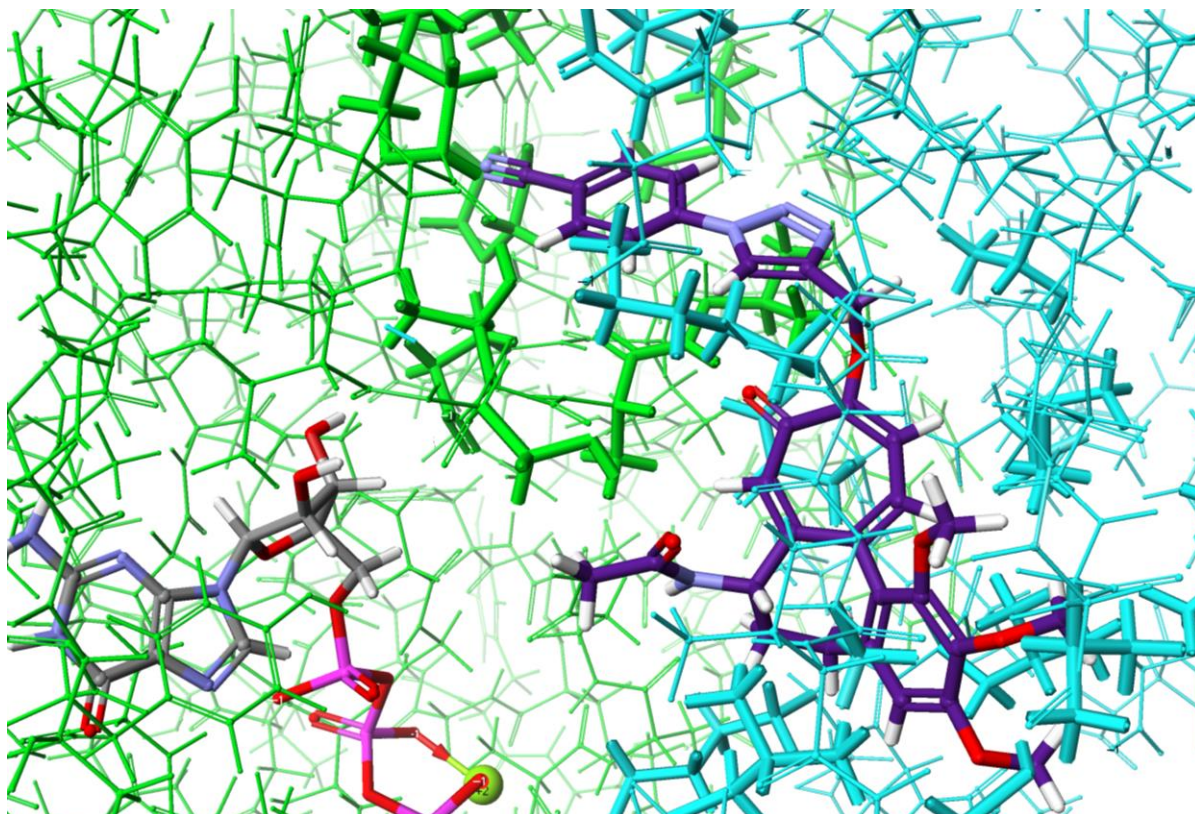

g) **7b** -  $\alpha_{\text{GTP}}/\beta$

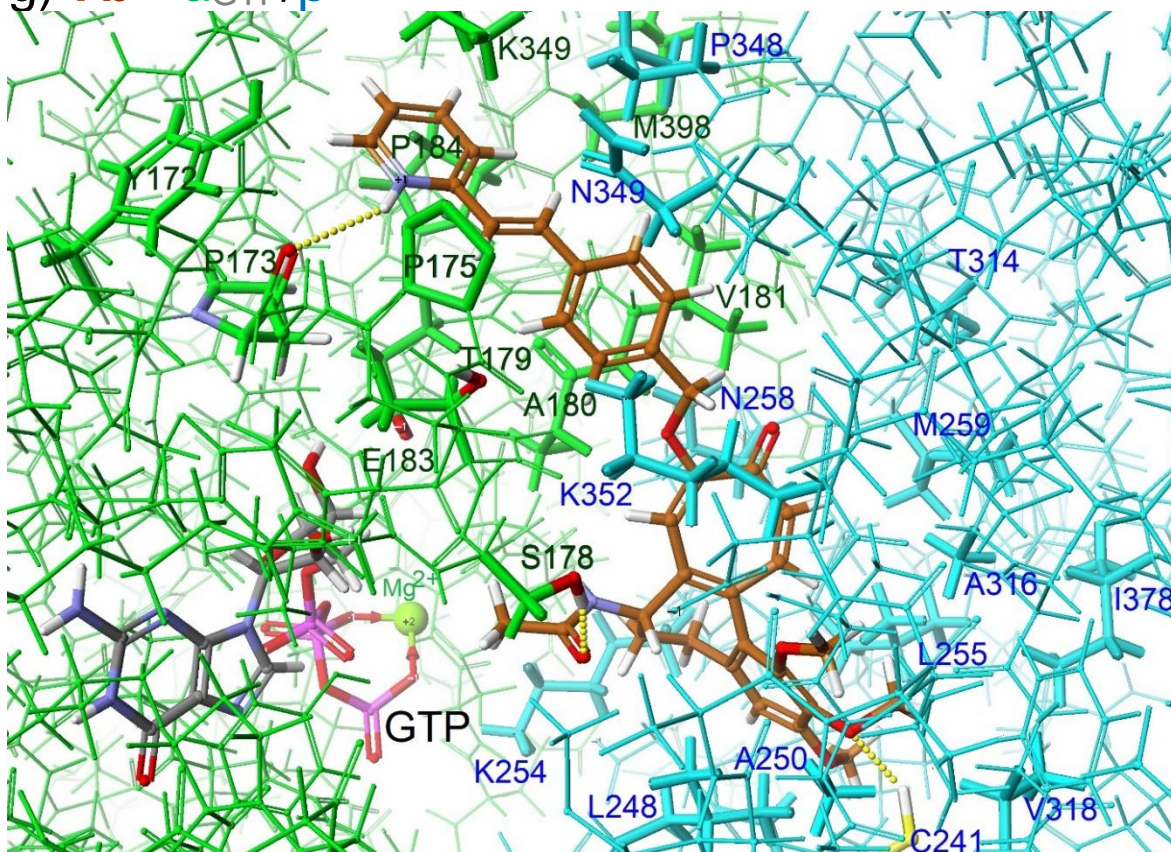



h) **8b** -  $\alpha_{\text{GTP}}/\beta$

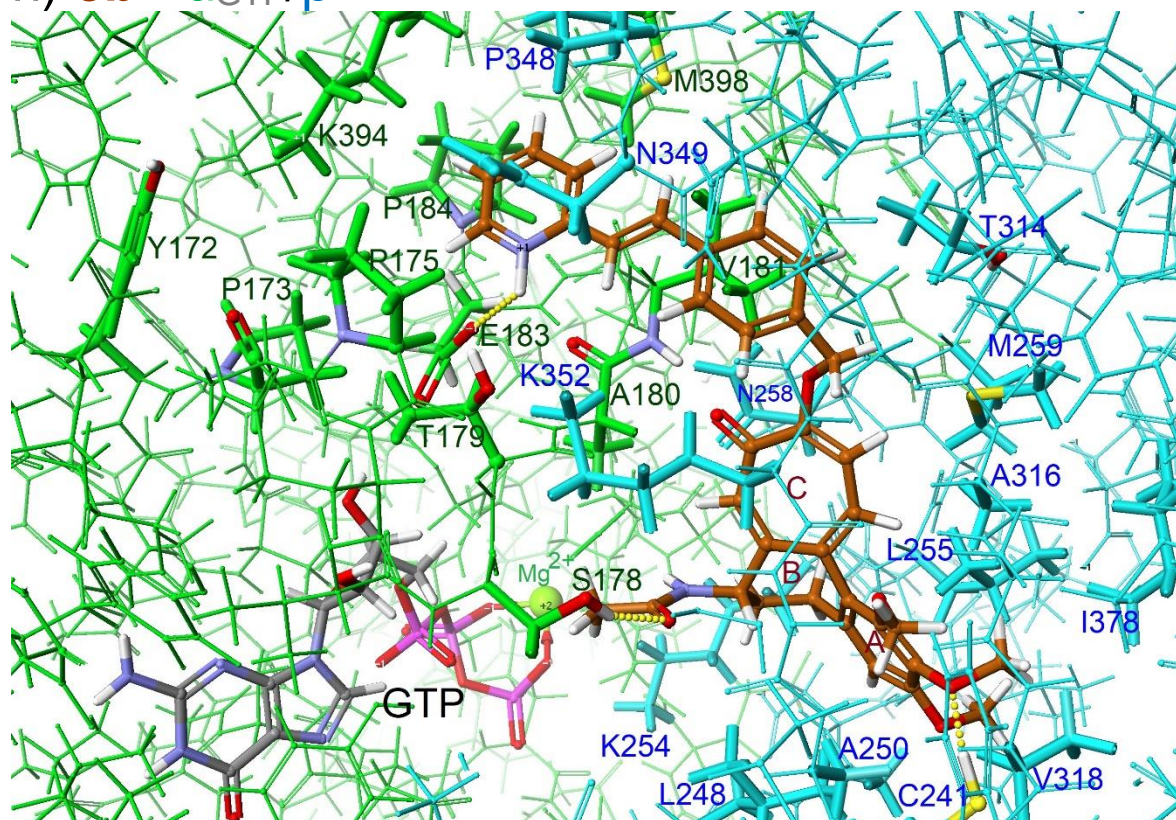

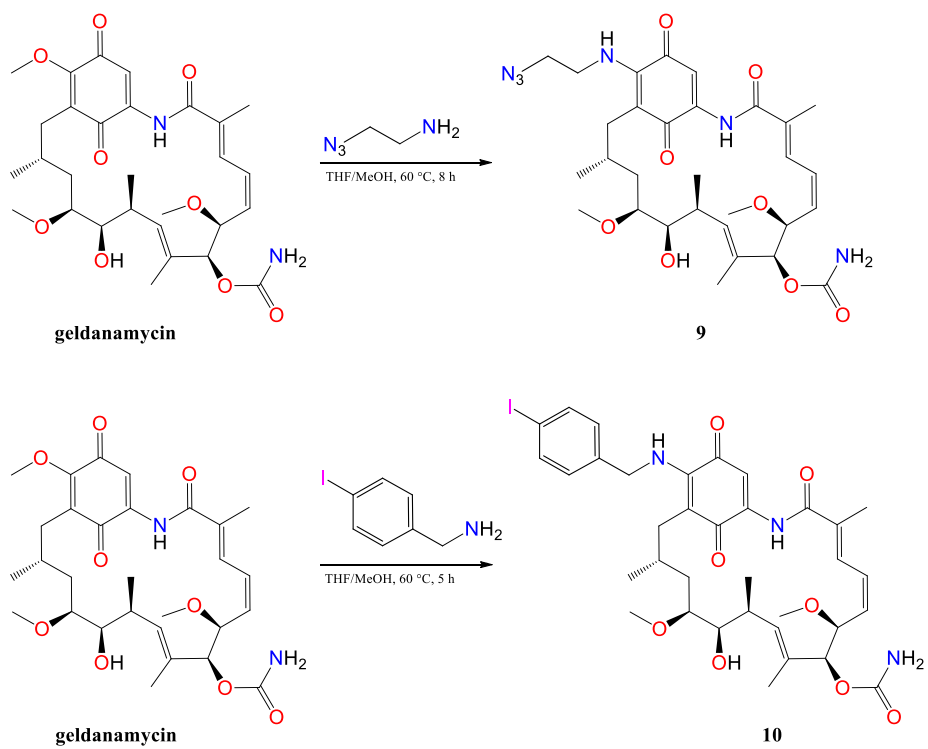

**Scheme 1S.** Synthesis and structure new geldanamycin derivatives (**9** and **10**).

**Figure 6S.** DFT calculated geometries (xyz coordinates) and partial charges for complexes of **2** with Na<sup>+</sup> and MTBD.

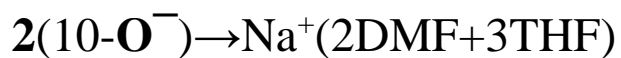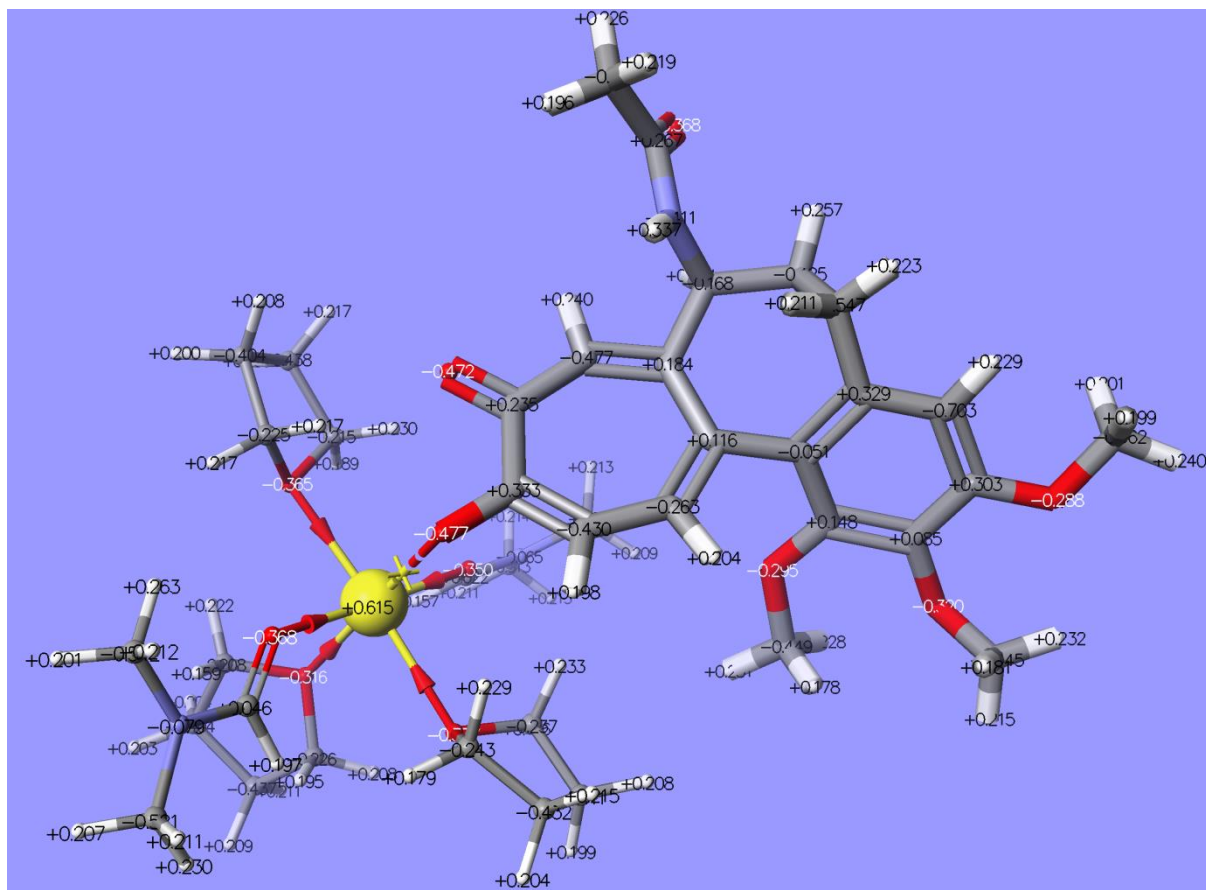

**E= -2675.74 au**

**XYZ**

C -10.820851 -1.806566 -15.467258

C -9.573829 -2.258604 -15.023389

C -9.528284 -3.127549 -13.908794

C -10.720803 -3.630823 -13.344962

C -11.965085 -3.220906 -13.847483

C -11.993117 -2.283952 -14.879593

C -10.928345 -0.631996 -16.397675

C -8.281607 -1.861704 -15.694293

O -8.270844 -3.478026 -13.478997

O -10.642868 -4.51585 -12.304157  
O -13.106632 -3.671565 -13.240234  
H -12.953891 -1.879334 -15.232326  
C -8.000591 -4.530955 -12.567724  
C -11.378204 -5.729428 -12.421157  
C -14.351667 -3.050027 -13.52489  
H -8.41592 -5.493421 -12.941782  
H -8.394199 -4.292684 -11.554977  
H -6.898284 -4.648555 -12.480539  
H -11.330967 -6.12606 -13.460776  
H -12.43677 -5.591899 -12.112266  
H -10.927499 -6.486088 -11.742062  
H -14.645811 -3.217558 -14.585164  
H -14.311546 -1.960386 -13.299613  
H -15.133784 -3.50473 -12.878122  
C -7.909035 -0.459835 -16.03348  
C -10.323281 0.547978 -15.618234  
C -8.84988 0.762038 -15.972531  
H -10.398774 -0.824684 -17.357464  
H -11.991184 -0.415895 -16.651989  
C -7.483831 -2.900364 -15.986391  
C -6.706795 -0.106528 -16.518608  
H -10.896427 1.4761 -15.84759  
H -10.435868 0.392992 -14.519645  
H -8.424495 1.453459 -15.206618  
N -8.810137 1.389479 -17.302077  
H -8.705716 0.787693 -18.131979  
C -8.884843 2.761359 -17.475587  
C -8.742908 3.233515 -18.918342  
O -9.036399 3.537039 -16.561611

H -7.758086 2.926065 -19.336393  
H -9.546442 2.803271 -19.556887  
H -8.809567 4.342483 -18.98389  
H -6.611355 0.979409 -16.67751  
C -5.425386 -0.698449 -16.92025  
C -6.120015 -3.031119 -16.518282  
H -7.935573 -3.888249 -15.800114  
C -5.179176 -2.152683 -16.858263  
O -4.573411 0.0506426 -17.34525  
O -4.019656 -2.708875 -17.343966  
H -5.803519 -4.074878 -16.647662  
Na -2.113666 -2.9958 -16.148297  
O 0.0419037 -3.314152 -14.759798  
O -1.153915 -0.697791 -16.829806  
C 0.233024 -4.684378 -14.419518  
C 1.70699 -4.733065 -13.969406  
C 2.360567 -3.565904 -14.750371  
C 1.18218 -2.953489 -15.536133  
H -0.474913 -4.996942 -13.61899  
H 0.0788361 -5.331446 -15.311511  
H 1.789114 -4.558722 -12.871414  
H 2.177735 -5.715343 -14.205897  
H 2.796936 -2.82089 -14.045161  
H 3.167491 -3.917466 -15.43435  
H 1.259064 -1.847292 -15.63728  
H 1.118145 -3.404957 -16.551831  
C -1.526689 -0.398866 -18.17319  
C -1.702233 0.333652 -16.014842  
H -2.588162 -0.668692 -18.355955  
H -0.892907 -0.96791 -18.890668

C -1.319726 1.126715 -18.281844  
H -1.212893 0.343025 -15.014501  
H -2.792218 0.180218 -15.86929  
C -1.42671 1.620617 -16.818485  
H -2.08766 1.596414 -18.938999  
H -0.312368 1.359957 -18.69814  
H -2.243131 2.367552 -16.685282  
H -0.467556 2.08788 -16.49541  
O -1.141608 -3.822606 -18.031507  
C -0.67522 -4.918885 -18.226455  
N -0.148584 -5.363927 -19.427771  
H -0.648612 -5.681903 -17.409156  
C 0.320275 -6.736576 -19.562929  
C -0.221389 -4.519171 -20.615059  
H -0.965373 -4.915122 -21.341776  
H -0.511908 -3.470502 -20.383372  
H 0.761255 -4.474729 -21.135042  
H 0.449062 -7.243848 -18.580996  
H -0.393314 -7.346297 -20.160518  
H 1.305537 -6.774229 -20.078333  
O -3.154743 -2.129361 -14.322527  
C -2.652862 -1.791955 -13.277711  
N -3.343991 -1.269879 -12.196643  
H -1.548052 -1.885853 -13.11917  
C -2.637925 -0.864937 -10.987912  
C -4.786359 -1.062158 -12.279372  
H -5.227428 -1.443801 -13.226877  
H -5.312491 -1.578281 -11.445653  
H -5.037201 0.0198577 -12.213065  
H -3.045375 -1.386125 -10.093114

H -1.548853 -1.089297 -11.028423

H -2.741977 0.228883 -10.812158

O -2.906711 -5.352772 -15.443094

C -3.883172 -5.235864 -14.411881

C -3.562612 -6.023203 -16.520393

H -4.648593 -4.474962 -14.681472

H -3.409271 -4.943475 -13.447202

C -4.50889 -6.640047 -14.36367

H -2.822329 -6.447379 -17.234043

H -4.222655 -5.324007 -17.075491

C -4.395453 -7.127234 -15.827004

H -5.563145 -6.614854 -14.003393

H -3.920744 -7.303825 -13.688167

H -5.39635 -7.235892 -16.305009

H -3.874651 -8.111704 -15.874648

-----

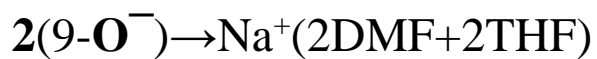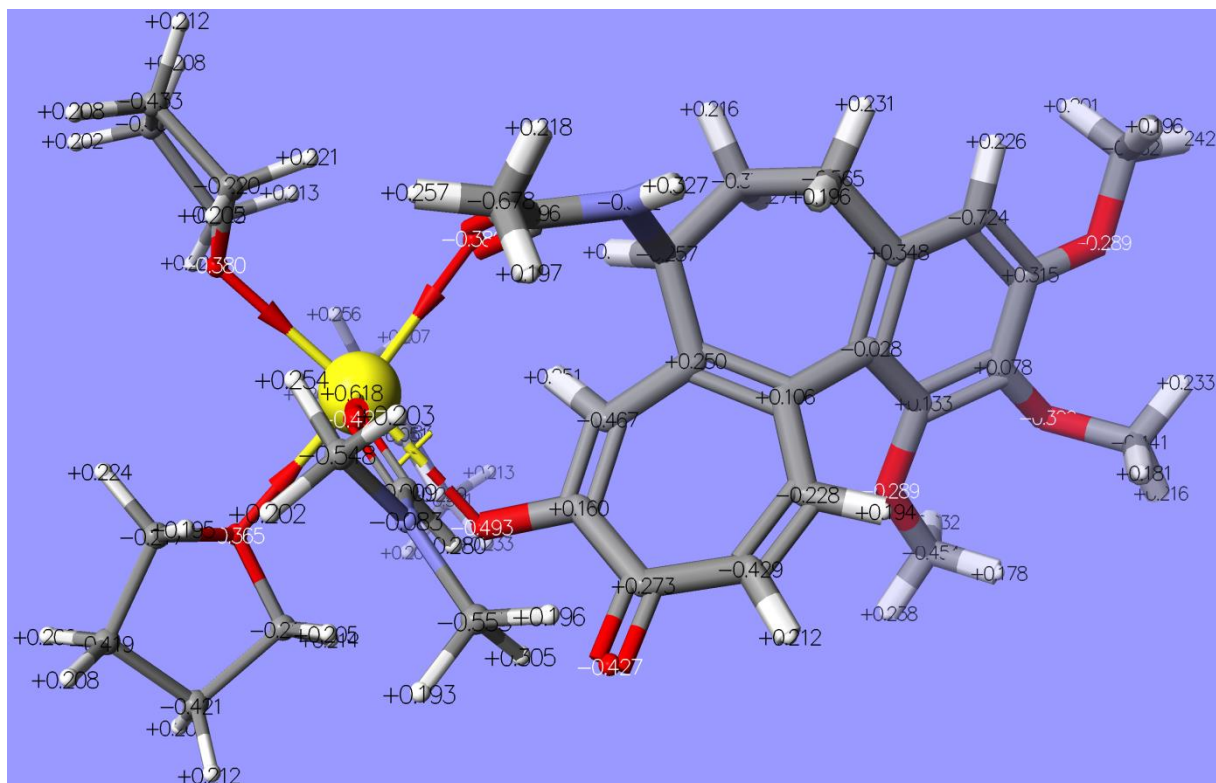

**E= -2443.44 au**

**XYZ**

C -10.724985 -1.605311 -15.861662  
 C -9.452475 -1.973988 -15.413875  
 C -9.362619 -2.862128 -14.315811  
 C -10.523209 -3.449635 -13.769411  
 C -11.788013 -3.088789 -14.248057  
 C -11.868792 -2.16732 -15.2904  
 C -10.917644 -0.458518 -16.807672  
 C -8.160267 -1.464438 -16.005013  
 O -8.092084 -3.113505 -13.858558  
 O -10.436647 -4.310873 -12.712047  
 O -12.892997 -3.629906 -13.645745  
 H -12.853033 -1.83647 -15.654729  
 C -7.770423 -3.994868 -12.795154



C -10.824582 -5.65012 -12.996645  
C -14.190585 -3.238519 -14.069015  
H -8.064555 -5.037934 -13.044913  
H -8.245499 -3.663061 -11.845689  
H -6.668559 -3.981979 -12.646264  
H -10.335033 -6.015102 -13.927518  
H -11.92751 -5.740242 -13.09952  
H -10.506687 -6.302827 -12.154344  
H -14.353714 -3.498859 -15.138891  
H -14.348889 -2.148937 -13.905552  
H -14.944611 -3.789112 -13.465017  
C -7.8563 -0.156735 -16.172295  
C -10.335127 0.786664 -16.118539  
C -8.850127 1.001014 -16.424598  
H -10.441135 -0.691322 -17.784011  
H -11.999599 -0.293584 -17.016089  
C -7.191838 -2.542481 -16.297447  
C -6.47974 0.37385 -16.326709  
H -10.897843 1.68611 -16.46216  
H -10.497408 0.731454 -15.016698  
H -8.533314 1.874255 -15.806817  
N -8.972404 1.4404764 -17.8373582  
H -9.4018156 0.8237568 -18.5348895  
C -8.0420769 2.3418125 -18.3414022  
C -7.8186274 2.203117 -19.8461189  
O -7.401677 3.067574 -17.6169093  
H -7.2643496 3.0707942 -20.2610156  
H -7.2476701 1.2754177 -20.074881  
H -8.7900925 2.1553931 -20.3869461  
H -6.5558538 1.4511833 -16.1209927

C -5.251972 -0.0685233 -16.583223  
C -5.913992 -2.532561 -16.665599  
H -7.608423 -3.559543 -16.207755  
C -4.905846 -1.480749 -16.833734  
O -4.259791 0.875566 -16.746555  
O -3.782233 -1.79832 -17.164575  
H -5.476137 -3.526669 -16.854963  
Na -4.777936 3.0887384 -17.812497  
O -2.226292 3.4554274 -17.672018  
O -5.058547 5.4405514 -18.842023  
C -1.572346 2.2151254 -17.410653  
C -0.096392 2.5167754 -17.745846  
C -0.1901778 3.6718244 -18.773654  
C -1.709421 3.8900094 -18.926219  
H -1.719836 1.9011134 -16.35242  
H -1.962837 1.4203924 -18.085818  
H 0.456596 2.8475944 -16.836211  
H 0.418694 1.6217414 -18.165036  
H 0.302093 4.5888884 -18.374108  
H 0.287257 3.4114874 -19.746463  
H -1.977675 4.9535514 -19.1194  
H -2.109979 3.2601354 -19.752607  
C -5.994709 5.4112994 -19.91531  
C -5.630743 6.3262134 -17.882333  
H -6.91602 4.8654734 -19.61037  
H -5.557719 4.9185274 -20.813344  
C -6.312323 6.9022114 -20.140083  
H -4.88124 6.6132884 -17.110149  
H -6.500005 5.8411024 -17.380997  
C -6.100223 7.5234984 -18.737313

H -7.350466 7.0507184 -20.517413  
H -5.602588 7.3483004 -20.875003  
H -7.035864 7.9728124 -18.33137  
H -5.31682 8.3155934 -18.775934  
O -4.507855 2.1635584 -19.871453  
C -4.143472 1.0210654 -20.02225  
N -3.942999 0.3803824 -21.23389  
H -3.931055 0.3716864 -19.133911  
C -3.483531 -1.0028456 -21.264724  
C -4.149766 1.0911024 -22.488362  
H -4.891642 0.5636654 -23.12823  
H -4.525359 2.1279074 -22.341119  
H -3.201974 1.1644334 -23.066561  
H -3.390265 -1.4515046 -20.250867  
H -4.049362 -1.80735 -21.704121  
H -2.485655 -1.0810376 -21.750818  
O -4.956594 3.9458474 -15.71566  
C -4.614048 3.3124594 -14.745147  
N -4.653877 3.7441914 -13.429444  
H -4.212544 2.2714764 -14.861278  
C -4.158102 2.8844254 -12.362291  
C -5.08881 5.0973554 -13.110286  
H -4.242925 5.7065994 -12.720996  
H -5.506147 5.6362164 -13.989535  
H -5.880856 5.0886694 -12.328832  
H -3.968585 1.8415474 -12.701539  
H -3.065694 3.112273 -11.809116  
H -4.887745 2.8247624 -11.524377

-----

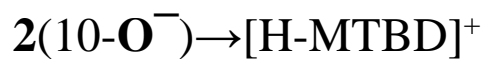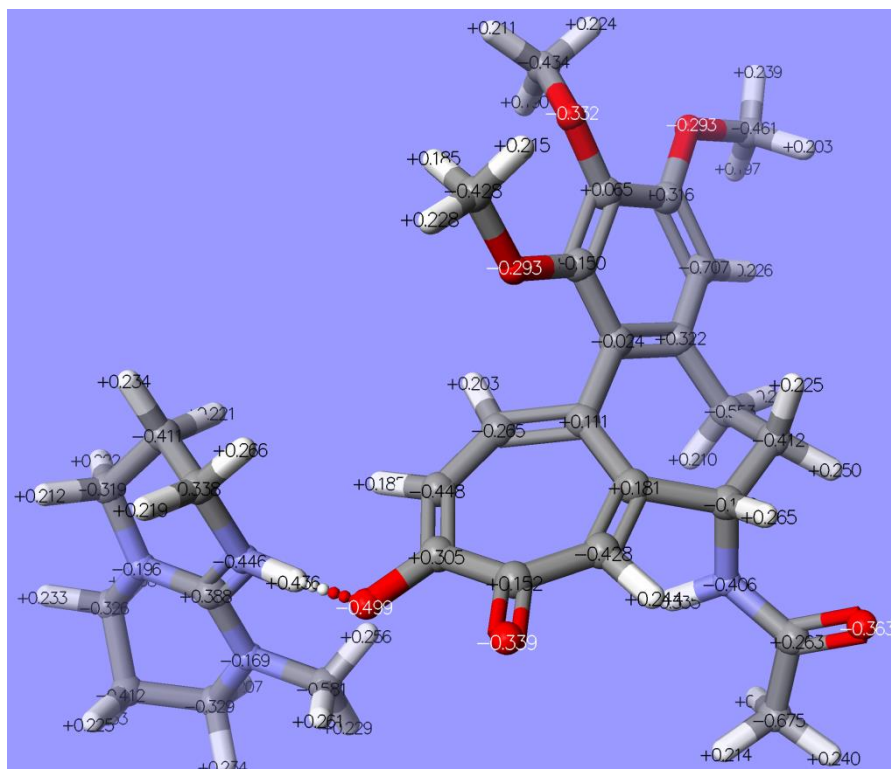

**E= -1797.89 au**

**XYZ**

C 16.513147 -0.004187 -1.141128  
 C 17.468232 -0.455708 -0.201528  
 C 17.409228 -1.840298 0.208433  
 C 16.433595 -2.723629 -0.332158  
 C 15.498137 -2.227033 -1.280923  
 C 15.555236 -0.884315 -1.683539  
 C 16.367217 1.476865 -1.438086  
 C 18.574153 0.425213 0.35539  
 O 18.352457 -2.20788 1.151795  
 O 16.341286 -4.025349 0.165389  
 O 14.549093 -3.135118 -1.732341  
 H 14.82123 -0.488104 -2.387777

C 18.326579 -3.459129 1.89442  
C 16.29756 -5.128684 -0.784446  
C 13.53719 -2.643851 -2.640334  
H 18.623048 -4.313352 1.261847  
H 17.340196 -3.657545 2.339458  
H 19.077167 -3.308459 2.686987  
H 16.84868 -4.891978 -1.71148  
H 15.253892 -5.381292 -1.031207  
H 16.778049 -5.98225 -0.277024  
H 13.982355 -2.233448 -3.565702  
H 12.907421 -1.871706 -2.159859  
H 12.918222 -3.518282 -2.89011  
C 18.365984 1.706574 1.023701  
C 15.971905 2.203823 -0.125591  
C 17.178206 2.676786 0.715481  
H 17.291739 1.921554 -1.851168  
H 15.582812 1.622727 -2.199097  
C 19.859194 -0.111952 0.198393  
C 19.2468 2.299821 1.927971  
H 15.377485 3.105648 -0.343376  
H 15.331351 1.540431 0.480895  
H 16.775577 3.053996 1.669776  
N 17.78759 3.865881 0.037231  
H 18.721289 3.751099 -0.359083  
C 17.297497 5.147076 0.200351  
C 18.158473 6.245851 -0.445697  
O 16.24215 5.390954 0.815198  
H 19.164095 6.273768 0.011035

H 18.283674 6.070484 -1.529108  
H 17.6692 7.218216 -0.292715  
H 18.884412 3.232406 2.381646  
C 20.583473 2.016917 2.466773  
C 21.143475 0.268597 0.671545  
H 19.896227 -1.00527 -0.435534  
C 21.520505 1.145843 1.692224  
O 20.990309 2.63701 3.480936  
O 22.8124 1.278219 2.057116  
H 21.97578 -0.284263 0.21925  
C 24.783153 -2.717163 0.151468  
C 24.444709 -1.61024 1.165301  
N 24.501304 -0.270172 0.55097  
C 25.470467 -0.05111 -0.326645  
N 26.405417 -1.01947 -0.710151  
C 26.188735 -2.45699 -0.413008  
N 25.57321 1.212474 -0.903587  
C 26.712587 1.63957 -1.740223  
C 27.92987 0.728252 -1.538179  
C 27.491418 -0.734824 -1.66291  
C 24.563233 2.234625 -0.571759  
H 24.693398 3.083309 -1.260586  
H 23.544913 1.837559 -0.7055  
H 24.661079 2.600545 0.466272  
H 24.03492 -2.70481 -0.660786  
H 24.754607 -3.714447 0.623887  
H 23.4315 -1.759771 1.576505  
H 25.147056 -1.668682 2.022485

H 26.338035 -3.032767 -1.346434

H 26.961741 -2.794331 0.305708

H 26.421068 1.646284 -2.810979

H 26.977528 2.677136 -1.471691

H 28.700013 0.962678 -2.292714

H 28.368161 0.895078 -0.539044

H 27.175496 -0.957399 -2.705489

H 28.336006 -1.407803 -1.428182

H 23.801102 0.440074 1.122042

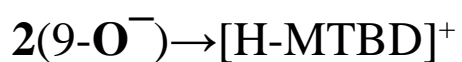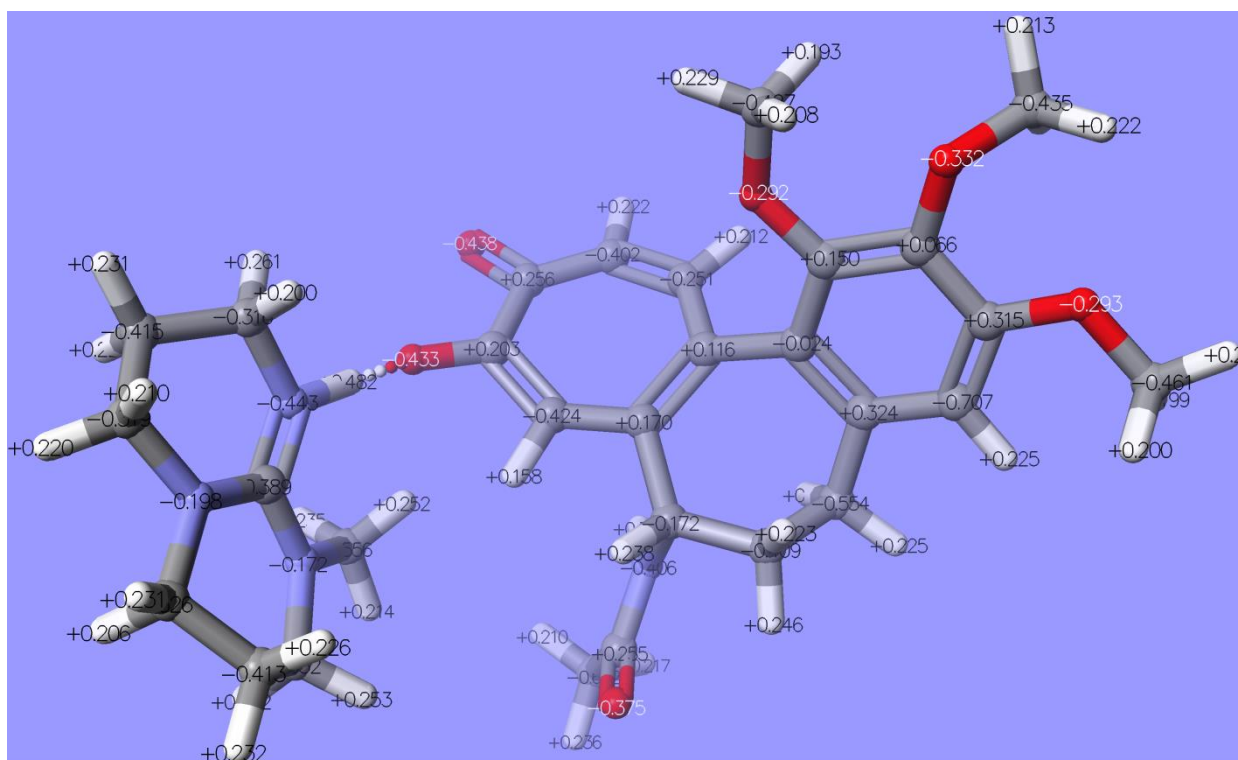

**$E = -1784.87$  au**

**XYZ**

C 16.5196046 -0.0050532 -1.1528828

C 17.4746896 -0.4565742 -0.2132828

C 17.4156856 -1.8411642 0.1966782  
C 16.4400526 -2.7244952 -0.3439128  
C 15.5045946 -2.2278992 -1.2926778  
C 15.5616936 -0.8851812 -1.6952938  
C 16.3736746 1.4759988 -1.4498408  
C 18.5806106 0.4243468 0.3436352  
O 18.3589146 -2.2087462 1.1400402  
O 16.3477436 -4.0262152 0.1536342  
O 14.5555506 -3.1359842 -1.7440958  
H 14.8276876 -0.4889702 -2.3995318  
C 18.3330366 -3.4599952 1.8826652  
C 16.3040176 -5.1295502 -0.7962008  
C 13.5436476 -2.6447172 -2.6520888  
H 18.6295056 -4.3142182 1.2500922  
H 17.3466536 -3.6584112 2.3277032  
H 19.0836246 -3.3093252 2.6752322  
H 16.8551376 -4.8928442 -1.7232348  
H 15.2603496 -5.3821582 -1.0429618  
H 16.7845066 -5.9831162 -0.2887788  
H 13.9888126 -2.2343142 -3.5774568  
H 12.9138786 -1.8725722 -2.1716138  
H 12.9246796 -3.5191482 -2.9018648  
C 18.3724416 1.7057078 1.0119462  
C 15.9783626 2.2029568 -0.1373458  
C 17.1846636 2.6759198 0.7037262  
H 17.2981966 1.9206878 -1.8629228  
H 15.5892696 1.6218608 -2.2108518  
C 19.8656516 -0.1128182 0.1866382  
C 19.2532576 2.2989548 1.9162162  
H 15.3839426 3.1047818 -0.3551308



H 15.3378086 1.5395648 0.4691402  
H 16.7820346 3.0531298 1.6580212  
N 17.7940476 3.8650148 0.0254762  
H 18.7277466 3.7502328 -0.3708378  
C 17.3039546 5.1462098 0.1885962  
C 18.1649306 6.2449848 -0.4574518  
O 16.2486076 5.3900878 0.8034432  
H 19.1705526 6.2729018 -7.198E-4  
H 18.2901316 6.0696178 -1.5408628  
H 17.6756576 7.2173498 -0.3044698  
H 18.8908696 3.2315398 2.3698912  
C 20.5899306 2.0160508 2.4550182  
C 21.1499326 0.2677308 0.6597902  
H 19.9026846 -1.0061362 -0.4472888  
C 21.5269626 1.1449768 1.6804692  
O 20.9967666 2.6361438 3.4691812  
O 22.8188576 1.2773528 2.0453612  
H 21.9822376 -0.2851292 0.2074952  
C 20.6921566 2.8456228 8.1408002  
C 20.5410746 2.2460248 6.7317802  
N 20.1343036 3.2643688 5.7449162  
C 19.2551556 4.1724188 6.1449362  
N 18.7273106 4.2257308 7.4401072  
C 19.3526906 3.4742518 8.5563002  
N 18.8959764 5.1625387 5.261038  
C 17.7147246 6.0692248 5.4902102  
C 16.8347186 5.5897038 6.6515672  
C 17.7261656 5.2270548 7.8441262  
C 19.7248129 5.3500741 4.000776  
H 20.7539581 5.5830382 4.2740669

H 19.7039005 4.4328111 3.4123109

H 19.3109446 6.1688561 3.4122107

H 21.4872246 3.6120178 8.1244282

H 20.9803266 2.0734678 8.8751732

H 21.4940596 1.8012148 6.3971082

H 19.7985706 1.4217898 6.7599862

H 19.5038506 4.1697808 9.4039342

H 18.6483516 2.6904138 8.8989302

H 18.1119416 7.0814318 5.7120262

H 17.1048036 6.1558538 4.5740562

H 16.1236266 6.3849858 6.9331212

H 16.2526676 4.7028808 6.3466692

H 18.2158156 6.1376378 8.2532702

H 17.1174626 4.7917088 8.6573182

H 20.5012326 2.9512418 4.7017622

-----

Figure 7S. DFT calculated geometries (xyz coordinates) of **5f**.

## XYZ data of hybrid **5f**

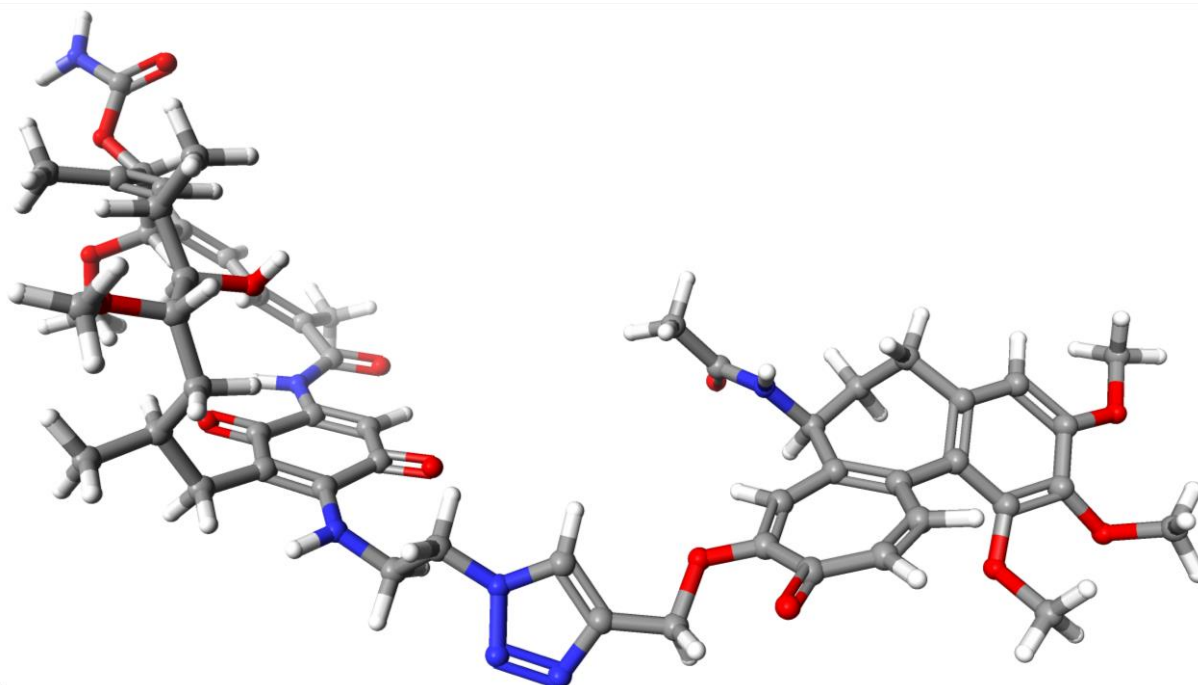

**E = -3531.9480140 au**

```
O -5.511875833279024 12.889565763030651 9.000084161491957
O -11.493981833279024 13.146701763030652 4.631696161491957
O -11.315877833279025 10.856826763030652 3.038279161491958
O -10.114992833279025 8.947796763030652 2.437590161491958
O -6.032961833279025 14.331057763030651 3.395927161491958
H -5.292856833279025 13.949565763030652 2.875826161491958
O -7.243699833279025 16.669185763030654 0.786374161491958
N -3.5080278332790242 18.606699763030655 5.985130161491957
O -2.4083338332790243 16.320161763030654 7.181249161491959
O -7.718695833279025 16.32451376303065 6.259848161491957
N -6.771876833279024 14.353932763030652 7.710460161491959
H -7.711013833279025 14.585345763030652 7.360744161491958
N -12.558445808252404 8.970226215348285 2.3456932376128306
```

C -6.577307833279025 13.148296763030652 8.415020161491958  
C -7.7479678332790245 12.197531763030652 8.405829161491958  
C -8.577584833279024 12.17205776303065 7.314367161491958  
H -8.339992833279025 12.864894763030652 6.5025091614919575  
C -9.718793833279024 11.298095763030652 7.058513161491959  
H -9.985120833279025 10.560199763030651 7.826698161491958  
C -10.485182833279024 11.33008576303065 5.9270791614919585  
H -11.324862833279024 10.628170763030651 5.841186161491958  
C -10.325778833279024 12.29163676303065 4.758757161491959  
H -9.432285833279025 12.923274763030651 4.897023161491958  
C -10.083416833279024 11.567363763030652 3.399925161491958  
H -9.295816833279025 10.814805763030652 3.555219161491958  
C -9.635982833279025 12.551129763030652 2.305580161491958  
C -8.309763833279025 12.821789763030651 2.2550921614919583  
H -7.655324833279025 12.252143763030652 2.930758161491958  
C -7.564939833279024 13.875236763030651 1.4498451614919579  
H -8.257101833279025 14.44028176303065 0.8085141614919581  
C -6.966608833279024 14.927093763030651 2.4499281614919584  
H -7.797150833279025 15.271758763030652 3.0840711614919583  
C -6.3052958332790245 16.170822763030653 1.7766501614919579  
H -5.392276833279024 15.821249763030652 1.2448091614919579  
C -5.840655833279024 17.244766763030654 2.809872161491958  
H -5.262581833279024 18.023120763030654 2.274365161491958  
H -5.123452833279025 16.723990763030653 3.466400161491958  
C -6.937363833279025 17.920850763030653 3.6889861614919583  
H -7.678347833279025 17.161958763030654 3.9815591614919583  
C -6.354467833279025 18.479784763030654 5.035960161491959

H -5.695730833279025 19.334481763030652 4.793630161491958  
H -7.203190833279025 18.904496763030654 5.601373161491958  
C -5.648046833279024 17.456559763030654 5.924574161491957  
C -4.308860833279025 17.536992763030653 6.320879161491957  
C -3.656391833279024 16.375913763030653 7.083279161491959  
C -4.506621833279024 15.334158763030652 7.638766161491958  
H -4.0312388332790245 14.552618763030651 8.233245161491958  
C -5.844279833279025 15.309852763030651 7.339032161491959  
C -6.473609833279024 16.390505763030653 6.461862161491958  
C -7.807460833279024 11.256620763030652 9.593862161491957  
H -6.836034833279024 10.749476763030652 9.716638161491957  
H -8.596289833279025 10.49805376303065 9.490164161491958  
H -7.985504833279025 11.820765763030652 10.527328161491958  
C -11.504903833279025 14.234223763030652 5.584337161491959  
H -12.424149833279024 14.806675763030652 5.386337161491959  
H -10.626265833279025 14.89708576303065 5.450934161491958  
H -11.526302833279024 13.868703763030652 6.628911161491958  
C -11.176158833279025 9.55672276303065 2.5817111614919583  
C -10.715432833279024 13.176856763030651 1.440000161491958  
H -11.496051833279024 13.64728276303065 2.0607321614919583  
H -11.219946833279025 12.399456763030651 0.8371351614919581  
H -10.303271833279025 13.927650763030652 0.7500011614919581  
C -6.499995833279025 13.20445176303065 0.5353211614919581  
H -5.757210833279024 12.626721763030652 1.116271161491958  
H -5.959900833279025 13.939150763030652 -0.08664083850804202  
H -6.991355833279025 12.487064763030652 -0.142407838508042  
C -6.630213833279025 17.432841763030652 -0.268226838508042

H -7.434135833279025 17.696311763030653 -0.974860838508042  
H -5.860333833279024 16.837285763030653 -0.802568838508042  
H -6.162807833279024 18.366527763030653 0.10265716149195797  
C -7.684080833279024 19.060778763030655 2.951124161491958  
H -6.989448833279025 19.868808763030653 2.649943161491958  
H -8.456469833279025 19.510259763030653 3.601115161491958  
H -8.180276833279025 18.682557763030655 2.0437031614919583  
C -2.239951833279024 19.048135763030654 6.612488161491958  
H -2.311172833279024 20.133722763030654 6.787302161491958  
C -1.033888833279024 18.751303763030652 5.685885161491958  
H -2.094555833279024 18.548128763030654 7.576087161491959  
H -13.389232885169697 9.53339380862684 2.5274488281955128  
H -12.655248350706154 8.013493311352637 2.005558825671697  
H -3.9862648332790247 19.340205763030653 5.463672161491958  
H -1.132347833279024 19.301495763030655 4.733170161491959  
H -0.993196833279024 17.674206763030654 5.478677161491959  
N 0.24027216672097612 19.131271763030654 6.325784161491958  
N 0.3963561667209761 20.363944763030652 6.914305161491958  
N 1.6509331667209761 20.430976763030653 7.357256161491959  
C 2.299717166720976 19.257079763030653 7.043743161491959  
C 1.4084221667209762 18.416662763030654 6.383996161491957  
C 3.756006166720976 19.033352763030653 7.373190161491959  
H 1.5111951667209762 17.411142763030654 5.982909161491959  
H 3.951137166720976 19.249749763030653 8.439604161491959  
H 4.409755166720975 19.655614763030652 6.7468411614919575  
C 8.822969166720975 12.671317763030652 8.085419161491957  
C 8.827419166720976 14.073599763030652 8.283385161491958

C 9.963760166720975 14.64794976303065 8.950379161491957  
C 11.068371166720976 13.857915763030652 9.360470161491957  
C 11.047757166720976 12.457332763030651 9.102451161491958  
C 9.928361166720975 11.887030763030651 8.469797161491957  
C 7.553778166720975 11.970327763030651 7.644135161491958  
C 7.741314166720976 14.998979763030652 7.786040161491957  
O 9.854325166720976 15.986728763030651 9.286843161491957  
O 12.055370166720975 14.456558763030651 10.139837161491958  
O 12.133418166720976 11.731618763030651 9.563400161491957  
H 9.878611166720976 10.80794276303065 8.307597161491957  
C 11.004815166720975 16.872410763030654 9.162649161491958  
C 13.430666166720975 14.353159763030652 9.664348161491958  
C 12.088399166720976 10.290660763030651 9.426607161491958  
H 11.648439166720975 16.583211763030654 8.312504161491958  
H 11.596874166720976 16.878747763030653 10.089933161491958  
H 10.578891166720975 17.871315763030655 8.973208161491957  
H 13.508090166720976 14.665581763030652 8.605505161491958  
H 13.812696166720976 13.32652776303065 9.774971161491958  
H 14.012375166720975 15.043380763030651 10.295434161491958  
H 12.042458166720975 9.986211763030651 8.364635161491957  
H 11.228212166720976 9.862083763030652 9.973229161491957  
H 13.025663166720975 9.925365763030651 9.872081161491957  
C 6.354447166720975 14.818280763030652 7.9555781614919585  
C 6.471578166720976 12.242688763030651 8.725359161491959  
C 5.644418166720976 13.51993776303065 8.453560161491957  
H 7.202497166720976 12.323564763030651 6.656611161491957  
H 7.738340166720976 10.888376763030651 7.546914161491959

C 8.284413166720975 16.130558763030653 7.049164161491959  
C 5.354228166720976 15.832544763030652 7.715251161491958  
H 5.750288166720975 11.41250676303065 8.790147161491957  
H 6.955012166720976 12.315404763030651 9.714177161491957  
H 5.096347166720975 13.756568763030652 9.382038161491957  
N 4.5809701667209755 13.200808763030652 7.456788161491959  
H 4.761736166720976 13.401287763030652 6.472644161491958  
C 3.382866166720976 12.606816763030652 7.812807161491959  
C 2.417911166720976 12.331437763030651 6.651454161491959  
O 3.1142171667209757 12.305975763030652 8.989857161491958  
H 2.538854166720976 13.037913763030652 5.811766161491958  
H 2.582998166720976 11.30805676303065 6.270096161491958  
H 1.386890166720976 12.388548763030652 7.0311291614919575  
H 4.357764166720975 15.53942676303065 8.065421161491958  
C 5.303939166720975 17.10053476303065 7.150774161491958  
C 7.744403166720976 17.256960763030655 6.468977161491958  
H 9.356147166720975 16.02691376303065 6.852452161491959  
C 6.391352166720975 17.81014676303065 6.430645161491958  
O 4.0178861667209755 17.609618763030653 7.120893161491958  
O 6.163440166720975 18.855031763030652 5.762198161491957  
H 8.439755166720975 17.880182763030653 5.891270161491958



## EXPERIMENTAL SECTION:

### General Experimental:

Colchicine, geldanamycin and  $\text{CDCl}_3$ ,  $\text{DMSO-d}_6$  for spectroscopic measurements,  $\text{NaH}$ ,  $\text{K}_2\text{CO}_3$ ,  $N,N,N',N'$ -Tetramethylguanidine (TMG), 1,5,7-triazabicyclo[4.4.0]dec-5-ene (TBD), 7-Methyl-1,5,7-triazabicyclo[4.4.0]dec-5-ene (MTBD),  $N,N,N',N',N'',N''$ -Hexamethylphosphorimidic triamide (Phosphazene base  $\text{P}_1\text{-H}$ ),  $N'',N''''''$ -1,8-Naphthalenediylbis( $N,N,N',N'$ -tetramethyl-guanidine) (TMGN), benzyl bromide, 4-iodobenzyl bromide, 3-bromo-1-phenyl-1-propene, allyl bromide, crotyl bromide, propargyl bromide, ethyl bromoacetate, 4-bromo-1-butene, 1-[(3-azidopropane)sulfonyl]-4-methylbenzene, 4-vinylbenzyl chloride, 4-iodobenzylamine, propargyl chloroformate, 4-nitrobenzyl azide, 4-cyanobenzyl azide, benzyl azide, 2-acetamido-2-deoxy- $\beta$ -D-glucopyranosyl azide 3,4,6-triacetate, methanol, THF, DMF, toluene, acetone, xylene,  $\text{CuOAc}$ , ascorbic acid, TBA,  $\text{Pd}(\text{OAc})_2$ , used for the syntheses of new colchicine derivatives and performed test reactions,  $\text{CH}_3\text{COOC}_2\text{H}_5$ , DCM,  $\text{NaCl}$ ,  $\text{H}_2\text{O}$  HPLC gradient grade,  $\text{CH}_3\text{CN}$  HPLC gradient grade were purchased.

Colchicine was synthesized from colchicine by acidic hydrolysis in the mild conditions.<sup>3</sup>

To obtain new derivative of colchicine **5f**, **6f**, **7d**, **8d**, new derivatives of geldanamycin (**9** and **10**), were synthesized Scheme. 1S.

### HPLC separations

For HPLC separations the following settings were used:

Method HPLC 1: C18 250×4.6 mm (5  $\mu\text{m}$ , carbon load 17%, pH 2 to 13) column at 25 °C was used. The flow rates was 0.75 mL/min with injection volumes of 5  $\mu\text{L}$ . Mixtures of water, acetonitrile and 0.05%  $\text{NH}_3(\text{aq})$  at 30:45:25  $\text{H}_2\text{O}/\text{CH}_3\text{CN}/\text{buffer}$  was used as the mobile phase. The analytical wavelengths was  $\lambda_{\text{max}} = 220$  and 341 nm. Used for compounds: **3a-3j** and **4a-4j**.

Method HPLC 2: C18 150×4.6 mm (5  $\mu\text{m}$ , carbon load 11%, pH 1 to 11) column at 25 °C was used. The flow rate was 1 mL/min with injection volumes of 5  $\mu\text{L}$ . Mixtures of water and acetonitrile in gradient ratio: 90:10 to 60:40 by 10 min and 60:40 system solvent was continue to 25 min. The analytical wavelengths was  $\lambda_{\text{max}} = 220$  and 341 nm. Used for compounds: **3a-3j** and **4a-4j** as well as **7d** and **8d**.

Method HPLC 3: C18 150×4.6 mm (5  $\mu\text{m}$ , carbon load 11%, pH 1 to 11) column at 25 °C was used. The flow rate was 0.5 mL/min with injection volumes of 5  $\mu\text{L}$ . Mixtures of water and acetonitrile in 60:40 solvent system was used as a mobile phase. The analytical wavelengths was  $\lambda_{\text{max}} = 220$  and 260 nm. Used for compounds: **5a-5c**, **5f**, **6a-6c**, **6f**, **9** and **10**.

Method HPLC 4: C18 150×4.6 mm (5 μm, carbon load 11%, pH 1 to 11) column at 25 °C was used. The flow rate was 1 mL/min with injection volumes of 5 μL. Mixtures of water and acetonitrile in gradient ratio: 90:10 to 50:40 by 5 min and 50:50 solvent system was continue to 9 min. Then solvent system was changed to 20:80 by 3 min and 20:80 system solvent was continue to 20 min. The analytical wavelengths was  $\lambda_{\text{max}} = 220$  and 341 nm. Used for compounds: **7a-7c** and **8a-8c**.

All retention times (Rt) are given in minutes.

### FT-IR measurements

The FT-IR spectra of colchicine and its new derivatives as well as geldanamycin derivatives were recorded in KBr pellet or CH<sub>2</sub>Cl<sub>2</sub> solution. FT-IR measurements were performed at spectrometer equipped with a DTGS detector and two-columnar purge gas generator at resolution 1 cm<sup>-1</sup>, NSS = 150, range 4000-400 cm<sup>-1</sup>. The Happ-Genzel apodization function was used.

### NMR measurements

The <sup>1</sup>H and <sup>13</sup>C measurements of colchicine and its new derivatives as well as geldanamycin derivatives were performed in CDCl<sub>3</sub> or DMSO-d<sub>6</sub> at frequency 600 MHz, 500 MHz and 400 MHz spectrometers.

For 600 MHz spectrometer: the operating frequencies for <sup>1</sup>H measurements was 600.08 MHz; pulse width corresponding to the flip angle of 45<sup>0</sup>; spectral width sw = 9842.5 Hz; acquisition time at = 0.2 sec; relaxation delay d<sub>1</sub> = 1.0 s; T = 293.0 K, TMS was used as the internal standard. No window function or zero filling were used. Digital resolution was 0.2 Hz/point. <sup>13</sup>C NMR spectra were recorded at the operating frequency 150.454 MHz; pulse width corresponding to the flip angle of 60<sup>0</sup>; sw = 19000 Hz; at = 1.8 s; d<sub>1</sub> = 1.0 s; T = 293.0 K and TMS as the internal standard. Line broadening parameters of 0.5 or 1 Hz were applied

For 500 MHz spectrometer: the operating frequencies for <sup>1</sup>H measurements was 500.25 MHz; pulse width corresponding to the flip angle of 45<sup>0</sup>; spectral width sw = 11029.4 Hz; acquisition time at = 0.2 sec; relaxation delay d<sub>1</sub> = 1.0 s; T = 257.0 K, TMS was used as the internal standard. No window function or zero filling were used. Digital resolution was 0.2 Hz/point. <sup>13</sup>C NMR spectra were recorded at the operating frequency 125.79 MHz; pulse width corresponding to the flip angle of 60<sup>0</sup>; sw = 35714.3 Hz; at = 2.0 s; d<sub>1</sub> = 0.92 s; T = 257.0 K and TMS as the internal standard. Line broadening parameters of 0.5 or 1 Hz were applied.

For 400 MHz spectrometer: the operating frequencies for <sup>1</sup>H measurements was 402.65 MHz; pulse width corresponding to the flip angle of 45<sup>0</sup>; spectral width sw = 8064.5 Hz; acquisition time at = 5 sec; relaxation delay d<sub>1</sub> = 1.0 s; T = 293.0 K, TMS was used as the internal standard. No window function or zero filling were used. Digital resolution was 0.2 Hz/point. <sup>13</sup>C NMR spectra were recorded at the operating frequency 101.26 MHz; pulse

width corresponding to the flip angle of  $60^\circ$ ;  $sw = 26041.7$  Hz;  $at = 1.3$  s;  $d_1 = 1.0$  s;  $T = 293.0$  K and TMS as the internal standard. Line broadening parameters of 0.5 or 1 Hz were applied.

The  $^1\text{H}$  and  $^{13}\text{C}$  NMR resonances in solution were unambiguously assigned on the basis of the HMBC, HSQC, COSY and NOESY correlation spectra.

### DFT calculations

DFT calculations with DGauss using the B88-LYP GGA energy functional with the DZVP basis sets of energetically the most favorable structures of new hybrid derivatives of **2** were performed in the gas phase with the use of *Scigrass* F.J. 2.4 package (version EU 3.1.8, 2008-2014)<sup>2</sup>. Initial structures of analysed derivatives were assumed on  $^1\text{H}$ - $^1\text{H}$  NOESY contacts, after initial structural optimization (MM3 and MO-G PM6 semiempirical methods of *Scigrass* package) the local minimum searches were performed with the use of B88-LYP DFT method at the gradient not exciding 5 a.u. at one step. Assumed structures of complexes between **2** and MTBD as well as  $\text{Na}^+$  were calculated *via* initial optimization with semi-empirical PM6 method<sup>2</sup> and next with B88-LYP GGA<sup>2</sup> energy functional with the DZVP basis sets, at the gradient not exciding 1 a.u. All of geometries were verified as local minima (possessing no imaginary frequencies). The lowest energy structures of local-minimum energy, which are in total agreement with  $^1\text{H}$ - $^1\text{H}$  NOESY data were shown in Figs. 2, 4-6 and their xyz coordinates were placed in SI section.

### Biological assay

Human cancer cells SKBR-3 (human breast cancer cell line) and SKOV-3 (ovarian cancer cell line) were cultured in McCoy's Modified Medium. Human cancer cells PC-3 (human prostate cancer cell line) were cultured in F-12K medium. U-87MG cells (glioblastoma cell line) were cultured in Eagle's Minimal Essential Medium. Human Dermal Fibroblasts cell line (HDF) was cultured in Fibroblast Basal Medium. Each medium was supplemented with 10% fetal bovine serum, 1% L-glutamine, and 1% penicillin/streptomycin solution. The cell lines were kept in the incubator at  $37^\circ\text{C}$ . The optimal plating density of cell lines was determined to be  $5 \times 10^4$ . All the cell lines and mediums were obtained from American Type Culture Collection (ATCC) supplied by LGC-Standards. The protein-staining SRB (Sigma-Aldrich) microculture colorimetric assay, developed by the National Cancer Institute (USA) for in vitro antitumor screening was used in this study, to estimate the cell number by providing a sensitive index of total cellular protein content, being linear to cell density. The monolayer cell culture was trypsinized and the cell count was adjusted to  $5 \times 10^4$  cells. To each well of the 96 well microtiter plate, 0.1 mL of the diluted cell suspension (approximately 10,000 cells) was added. After 24 hours, when a partial monolayer was formed, the supernatant was washed out and 100  $\mu\text{L}$  of different concentrations of tested compounds (from 10nM to  $2 \times 10^5$ nM) were added to the cells in microtitre plates. The tested compounds were dissolved in DMSO (containing 10 % of water) (100  $\mu\text{L}$ ) and the content of DMSO did not exceed 0.1%; this concentration was found to be nontoxic to the cell lines. The cells were exposed to compounds for 72 hours at  $37^\circ\text{C}$  in a humidified atmosphere (90% RH) containing 5%  $\text{CO}_2$ .

After that, 25  $\mu\text{L}$  of 50 % trichloroacetic acid was added to the wells and the plates were incubated for 1 hour at 4  $^{\circ}\text{C}$ . The plates were then washed out with the distilled water to remove traces of medium and next dried by the air. The air-dried plates were stained with 100  $\mu\text{L}$  of 0.4% sulforhodamine B (prepared in 1 % acetic acid) and kept for 30 minutes at room temperature. The unbound dye was removed by rapidly washing with 1% acetic acid and then air dried overnight. The protein-bound dye was dissolved in 100  $\mu\text{L}$  of 10 mM unbuffered Tris base (pH 10.5) for optical density determination at 490 nm. All cytotoxicity experiments were performed three times. Cell survival was measured as the percentage absorbance compared to the control (nontreated cells). Cytarabine (**ara-C**), actinomycin D and mitomycin C were used as the internal standards. Additionally biological assays were performed in Human Dermal Fibroblasts cell line (HDF) in aim to evaluate cytotoxicity of **1- 8** analogs in healthy cells. Results of anticancer studies of **1-8** analogs are shown in Table 2. SI indexes were calculated from equation  $\text{SI} = \text{IC}_{50} \text{ normal cell line HDF} / \text{IC}_{50} \text{ respective cancerous cell line}$ . A beneficial  $\text{SI} > 1.0$  indicates a compound with efficacy against tumor cell greater than the toxicity against normal cells.

#### **S<sub>N</sub>2 reaction tests:**

Method 1. Compound 2 (10 mg, 0.026 mmol) was dissolved in the mixture of 1 mL THF with 0.5 mL DMF or in the mixture of 0.75 mL THF with 0.75 mL DMF or in 1.5 mL DMF. To this mixture 0.078 mmol one of the listed bromide: benzyl bromide, 4-iodobenzyl bromide, 3-bromo-1-phenyl-1-propene, allyl bromide, crotyl bromide, propargyl bromide or ethyl bromoacetate was added. After cooling the reaction mixture to 0  $^{\circ}\text{C}$  NaH (0.62 mg, 0.026 mmol) was added. The mixture was stirred at 70  $^{\circ}\text{C}$  for 240 minutes. Every 60 minutes 5  $\mu\text{L}$  sample of reaction mixture was taken to check the reaction progress (before injection extraction in the solvent system EtOAc:HCl<sub>(0.1 M)</sub> was performed, the organic layer was evaporated to dryness and the residue was dissolved in acetonitrile). All HPLC analysis were performed with the use of methods HPLC 1 and HPLC 2.

Method 2. Compound 2 (10 mg, 0.026 mmol) was dissolved in toluene (1.5 ml). To this mixture benzyl bromide (22.2 mg, 0.078 mmol) and K<sub>2</sub>CO<sub>3</sub> (10.5 mg, 0.078 mmol) were added. The mixture was stirred at 70  $^{\circ}\text{C}$  for 240 minutes. Every 60 minutes 5  $\mu\text{L}$  sample of reaction mixture was taken to check the reaction progress (before injection extraction in the solvent system EtOAc:HCl<sub>(0.1 M)</sub> was performed, the organic layer was evaporated to dryness and the residue was dissolved in acetonitrile). THF (66  $^{\circ}\text{C}$ ), acetone (56  $^{\circ}\text{C}$ ) or DMF (115  $^{\circ}\text{C}$ ) were also used as a solvent. All HPLC analysis were performed with the use of methods HPLC 1 and HPLC 2.

Method 3. Compound 2 (10 mg, 0.026 mmol) was dissolved in toluene (1.5 ml). To this mixture 0.078 mmol one of the listed bromide: benzyl bromide, 4-iodobenzyl bromide, 3-bromo-1-phenyl-1-propene, allyl bromide, crotyl bromide, propargyl bromide or ethyl bromoacetate and MTBD (8 mg, 0.052 mmol) were added. The mixture was stirred at 70  $^{\circ}\text{C}$  for 240 minutes. Every 60 minutes 5  $\mu\text{L}$  sample of reaction mixture was taken to check the reaction progress (before injection extraction in the solvent system EtOAc:HCl<sub>(0.1 M)</sub> was

performed, the organic layer was evaporated to dryness and the residue was dissolved in acetonitrile). For BnBr also other bases were used: TMG, Phosphazene base P1-H, DMAN or TBD. In the BnBr case THF (66 °C), acetone (56 °C), DMF (115 °C), ACN (70 °C) or xylene (115 °C) were also used as a solvent in the reaction performed with MTBD as a base. All HPLC analysis were performed with the use of methods HPLC 1 and HPLC 2.

To obtain 3-type and 4-type compounds in the larger scale the same conditions basis on the method 2 were used.

### Synthesis method and spectroscopic data of colchicine derivatives

Colchicine 150 mg (0.39 mmol) was dissolved in a 15 mL toluene and 1.17 mmol one of the listed bromide: benzyl bromide (**3a**, **4a**), 4-iodobenzyl bromide (**3b**, **4b**), 3-bromo-1-phenyl-1-propene (**3c**, **4c**), allyl bromide (**3d**, **4d**), crotyl bromide (**3e**, **4e**), propargyl bromide (**3f**, **4f**), ethyl bromoacetate (**3g**, **4g**), 4-bromo-1-butene (**3h**, **4h**) or 1-[(3-azidopropane)sulfonyl]-4-methylbenzene (**3i**, **4i**) and 4-vinylbenzyl chloride (**3j**, **4j**) were added. To each mixture, 157.5 mg (1.17 mmol) of K<sub>2</sub>CO<sub>3</sub> was added. The solution was stirred at 70 °C for a 4 h (for compounds **3h-3j** and **4h-4j** for 24 h) and after this time, diethyl ether was added and extracted twice with 25 mL of water. The organic layer was evaporated and the synthesized derivative **3a-3j** and **4a-4j** was purified by column chromatography with silica gel with dichloromethane/acetone (4:1 to 1:1) as an eluent. The products were obtained as a cream-coloured to little yellow powders. Yields are given after isolation.

(*S*)-*N*-(9-(benzyloxy)-1,2,3-trimethoxy-10-oxo-5,6,7,10-tetrahydrobenzo[*a*]heptalen-7-yl)acetamide (compound **3a**): Yield: 50%; HPLC Rt = 6.612 (HPLC method 1) and 13.118 (HPLC method 2), Anal. Calcd C<sub>28</sub>H<sub>29</sub>NO<sub>6</sub>: C, 70.72; H, 6.15; N, 2.95. Found: C, 70.71; H, 6.17; N, 2.94; HRMS (ESI-TOF) m/z: [M + Na]<sup>+</sup> Calcd for C<sub>28</sub>H<sub>29</sub>NNaO<sub>6</sub><sup>+</sup> 498.1887; Found 498.1889. <sup>1</sup>H NMR (500 MHz, CDCl<sub>3</sub>, T = 298 K) δ 7.42 (d, <sup>3</sup>J<sub>H11,H12</sub> = 12.8 Hz, 1H, H-12), 7.40 – 7.35 (m, 2H, H-20 + H-24), 7.34 – 7.29 (m, 2H, H-21 + H-23), 7.29 – 7.23 (m, 1H, H-22), 7.19 (s, 1H, H-8), 7.15 (d, <sup>3</sup>J<sub>H11,H12</sub> = 12.8 Hz, 1H, H-11), 6.95 (d, <sup>3</sup>J<sub>H7,NH</sub> = 6.4 Hz, 1H, 7-NH), 6.54 (s, 1H, H-4), 5.28 (s, 2H, H-18), 4.51 (dt, <sup>3</sup>J<sub>H6b,H7</sub> = 12.7 Hz, <sup>3</sup>J<sub>H6a,H7</sub> = 6.4 Hz, <sup>3</sup>J<sub>H7,NH</sub> = 6.4 Hz, 1H, H-7), 3.93 (s, 3H, H-16), 3.89 (s, 3H, H-17), 3.66 (s, 3H, H-15), 2.43 (dd, <sup>2</sup>J = 13.4 Hz, <sup>3</sup>J<sub>H5b,H6a</sub> = 6.4 Hz, 1H, H-5b), 2.27 (td, <sup>2</sup>J = 13.1 Hz, <sup>3</sup>J<sub>H5a,H6a</sub> = 13.1 Hz, <sup>3</sup>J<sub>H5a,H6b</sub> = 7.3 Hz, 1H, H-5a), 2.16 (tt, <sup>2</sup>J = 12.8, <sup>3</sup>J<sub>H5a,H6a</sub> = 12.8 Hz, <sup>3</sup>J<sub>H5b,H6a</sub> = 6.3 Hz, <sup>3</sup>J<sub>H6a,H7</sub> = 6.3 Hz, 1H, H-6a), 1.92 – 1.81 (m, 1H, H-6b), 1.81 (s, 3H, H-14), <sup>13</sup>C NMR (126 MHz, CDCl<sub>3</sub>, T = 298 K) δ 179.6 (C-10), 169.9 (C-13), 163.1 (C-9), 153.7 (C-3), 151.1 (C-1), 144.4 (C-7a), 141.7 (C-2), 141.3 (C-12), 135.9 (C-19), 135.2 (C-12a), 134.9 (C-4a), 134.3 (C-11), 128.9 (C-21 + C-23), 128.3 (C-22), 127.2 (C-20 + C-24), 125.9 (C-1a), 112.9 (C-8), 107.6 (C-4), 71.1 (C-18), 61.6 (C-15), 61.5 (C-16), 56.2 (C-17), 52.7 (C-7), 38.3 (C-6), 30.0 (C-5), 22.8 (C-14).

(*S*)-*N*-(9-((4-iodobenzyl)oxy)-1,2,3-trimethoxy-10-oxo-5,6,7,10-tetrahydrobenzo[*a*]heptalen-7-yl)acetamide (compound **3b**): Yield: 49%; HPLC Rt = 11.111 (HPLC method 1) and 17.018 (HPLC method 2), Anal. Calcd C<sub>28</sub>H<sub>28</sub>INO<sub>6</sub>: C, 55.92; H, 4.69; I, 21.10; N, 2.33. Found C, 55.94; H, 4.68; I, 20.11; N, 2.32; HRMS (ESI-TOF) m/z: [M + Na]<sup>+</sup> Calcd for

C<sub>28</sub>H<sub>28</sub>INNaO<sub>6</sub><sup>+</sup> 624.0854; Found 624.0856. <sup>1</sup>H NMR (401 MHz, CDCl<sub>3</sub>, T = 298 K) δ 7.66 (d, <sup>3</sup>J<sub>H20,H21</sub> and <sup>3</sup>J<sub>H23,H24</sub> = 8.3 Hz, 2H, H-21 + H-23), 7.42 (d, <sup>3</sup>J<sub>H11,H12</sub> = 12.8 Hz, 1H, H-12), 7.15 (d, <sup>3</sup>J<sub>H11,H12</sub> = 12.8 Hz, 1H, H-11), 7.13 (d, <sup>3</sup>J<sub>H20,H21</sub> and <sup>3</sup>J<sub>H23,H24</sub> = 8.3 Hz, 2H, H-20 + H-24), 7.07 (s, 1H, H-8), 6.59 (d, <sup>3</sup>J<sub>H7,NH</sub> = 6.3 Hz, 1H, 7-NH), 6.54 (s, 1H, H-4), 5.32 – 5.04 (m, 2H, H-18), 4.51 (dt, <sup>3</sup>J<sub>H6b,H7</sub> = 12.4 Hz, <sup>3</sup>J<sub>H6a,H7</sub> = 6.2 Hz, <sup>3</sup>J<sub>H7,NH</sub> = 6.2 Hz, 1H, H-7), 3.92 (s, 3H, H-16), 3.89 (s, 3H, H-17), 3.65 (s, 3H, H-15), 2.45 (dd, <sup>2</sup>J = 13.0 Hz, <sup>3</sup>J<sub>H5b,H6a</sub> = 6.1 Hz, 1H, H-5b), 2.28 (td, <sup>2</sup>J = 12.7 Hz, <sup>3</sup>J<sub>H5a,H6a</sub> = 12.7 Hz, <sup>3</sup>J<sub>H5a,H6b</sub> = 6.8 Hz, 1H, H-5a), 2.19 (tt, <sup>2</sup>J = 12.7, <sup>3</sup>J<sub>H5a,H6a</sub> = 12.7 Hz, <sup>3</sup>J<sub>H5b,H6a</sub> = 6.2 Hz, <sup>3</sup>J<sub>H6a,H7</sub> = 6.2 Hz, 1H, H-6a), 1.92 – 1.83 (m, 1H, H-6b), 1.83 (s, 3H, H-14), <sup>13</sup>C NMR (101 MHz, CDCl<sub>3</sub>, T = 298 K) δ 179.6 (C-10), 169.8 (C-13), 162.8 (C-9), 153.9 (C-3), 151.1 (C-1), 143.9 (C-7a), 141.8 (C-2), 141.4 (C-12), 138.0 (C-21 + C-23), 135.8 (C-19), 135.6 (C-12a), 134.8 (C-4a), 134.7 (C-11), 129.0 (C-20 + C-24), 125.9 (C-1a), 113.3 (C-8), 107.6 (C-4), 93.9 (C-22), 70.5 (C-18), 61.6 (C-15), 61.5 (C-16), 56.3 (C-17), 52.8 (C-7), 38.5 (C-6), 30.0 (C-5), 22.9 (C-14).

(*S,E*)-*N*-(9-(cinnamyloxy)-1,2,3-trimethoxy-10-oxo-5,6,7,10-tetrahydrobenzo[*a*]heptalen-7-yl)acetamide (compound **3c**): Yield: 46%; HPLC Rt = 8.865 (HPLC method 1) and 15.618 (HPLC method 2), Anal. Calcd C<sub>30</sub>H<sub>31</sub>NO<sub>6</sub>: C, 71.84; H, 6.23; N, 2.79. Found C, C, 71.83; H, 6.24; N, 2.81; HRMS (ESI-TOF) m/z: [M + Na]<sup>+</sup> Calcd for C<sub>30</sub>H<sub>31</sub>NNaO<sub>6</sub><sup>+</sup> 524.2044; Found 524.2041. <sup>1</sup>H NMR (500 MHz, Chloroform-*d*) δ 7.42 (d, <sup>3</sup>J<sub>H11,H12</sub> = 12.8 Hz, 1H, H-12), 7.37 (d, <sup>3</sup>J<sub>H22,H23</sub> and <sup>3</sup>J<sub>H25,H26</sub> = 7.1 Hz, 2H, H-22 + H-26), 7.30 (t, <sup>3</sup>J<sub>H22,H23</sub> and <sup>3</sup>J<sub>H25,H26</sub> = 7.4 Hz, <sup>3</sup>J<sub>HH23,24</sub> and <sup>3</sup>J<sub>H24,H26</sub> = 7.4 Hz, 2H, H-23 + H-25), 7.25 (t, <sup>3</sup>J<sub>HH23,24</sub> and <sup>3</sup>J<sub>H24,H26</sub> = 7.4 Hz, 1H, H-24), 7.18 (s, 1H, H-8), 7.16 (d, <sup>3</sup>J<sub>H11,H12</sub> = 13.1 Hz, 1H, H-11), 6.72 (d, <sup>3</sup>J<sub>H19,H20</sub> = 16.0 Hz, 1H, H-20), 6.52 (s, 1H, H-4), 6.46 (d, <sup>3</sup>J<sub>H7,NH</sub> = 6.1 Hz, 1H, 7-NH), 6.44 (dt, <sup>3</sup>J<sub>H19,H20</sub> = 16.0 Hz, <sup>3</sup>J<sub>H18,H19</sub> = 5.7 Hz, 1H, H-19), 4.99 – 4.83 (m, 2H, H-18), 4.58 (dt, <sup>3</sup>J<sub>H6b,H7</sub> = 12.4 Hz, <sup>3</sup>J<sub>H6a,H7</sub> = 6.2 Hz, <sup>3</sup>J<sub>H7,NH</sub> = 6.2 Hz, 1H, H-7), 3.93 (s, 3H, H-16), 3.89 (s, 3H, H-17), 3.67 (s, 3H, H-15), 2.47 (dd, <sup>2</sup>J = 13.3 Hz, <sup>3</sup>J<sub>H5b,H6a</sub> = 6.3 Hz, 1H, H-5b), 2.35 (td, <sup>2</sup>J = 12.8 Hz, <sup>3</sup>J<sub>H5a,H6a</sub> = 12.8 Hz, <sup>3</sup>J<sub>H5a,H6b</sub> = 6.9 Hz, 1H, H-5a), 2.26 (tt, <sup>2</sup>J = 12.6, <sup>3</sup>J<sub>H5a,H6a</sub> = 12.6 Hz, <sup>3</sup>J<sub>H5b,H6a</sub> = 6.2 Hz, <sup>3</sup>J<sub>H6a,H7</sub> = 6.2 Hz, 1H, H-6a), 2.00 – 1.91 (m, 1H, H-6b), 1.90 (s, 3H, H-14), <sup>13</sup>C NMR (126 MHz, CDCl<sub>3</sub>) δ 179.7 (C-10), 169.8 (C-13), 163.2 (C-9), 153.8 (C-3), 151.2 (C-1), 143.8 (C-7a), 141.8 (C-2), 141.2 (C-12), 136.1 (C-12a), 135.1 (C-4a), 134.8 (C-11), 134.5 (C-21), 133.9 (C-20), 128.8 (C-22 + C-26), 128.4 (C-24), 126.7 (C-23 + C-25), 126.0 (C-1a), 123.3 (C-19), 112.3 (C-8), 107.5 (C-4), 70.1 (C-18), 61.63 (C-15), 61.56 (C-16), 56.2 (C-17), 53.0 (C-7), 38.6 (C-6), 30.0 (C-5), 23.0 (C-14).

(*S*)-*N*-(9-(allyloxy)-1,2,3-trimethoxy-10-oxo-5,6,7,10-tetrahydrobenzo[*a*]heptalen-7-yl)acetamide (compound **3d**): Yield: 53%; HPLC Rt = HPLC Rt = 4.454 (HPLC method 1) and 10.725 (HPLC method 2), Anal. Calcd C<sub>24</sub>H<sub>27</sub>NO<sub>6</sub>: C, 67.75; H, 6.40; N, 3.29. Found: C, 67.76; H, 6.38; N, 3.30; HRMS (ESI-TOF) m/z: [M + Na]<sup>+</sup> Calcd for C<sub>24</sub>H<sub>27</sub>NNaO<sub>6</sub><sup>+</sup> 448.1731; Found 448.1729. <sup>1</sup>H NMR (500 MHz CDCl<sub>3</sub>, T = 298 K) δ 7.41 (d, <sup>3</sup>J<sub>H11,H12</sub> = 12.7 Hz, 1H, H-12), 7.17 (s, 1H, H-8), 7.13 (d, <sup>3</sup>J<sub>H11,H12</sub> = 12.8 Hz, 1H, H-11), 7.04 (d, <sup>3</sup>J<sub>H7,NH</sub> = 6.3 Hz, 1H, 7-NH), 6.55 (s, 1H, H-4), 6.04 (ddt, <sup>3</sup>J<sub>H19,H20trans</sub> = 17.3 Hz, <sup>3</sup>J<sub>H19,H20cis</sub> = 10.5 Hz, <sup>3</sup>J<sub>H18,H19</sub> = 5.2 Hz, 1H, H-19), 5.40 (dq, <sup>3</sup>J<sub>H19,H20trans</sub> = 17.3 Hz, <sup>2</sup>J = 1.5 Hz, <sup>4</sup>J<sub>H20trans,H18</sub> = 1.5 Hz, 1H, 20<sub>trans</sub>-H), 5.40 (dq, <sup>3</sup>J<sub>H19,H20cis</sub> = 10.5 Hz, <sup>2</sup>J = 1.3 Hz, <sup>4</sup>J<sub>H20cis,H18</sub> = 1.3 Hz, 1H, 20<sub>cis</sub>-H), 4.76 (m, 2H, H-18), 4.58 (dt, <sup>3</sup>J<sub>H6b,H7</sub> = 12.5 Hz, <sup>3</sup>J<sub>H6a,H7</sub> = 6.3 Hz, <sup>3</sup>J<sub>H7,NH</sub> = 6.3 Hz, 1H,

H-7), 3.92 (s, 3H, H-16), 3.89 (s, 3H, H-17), 3.65 (s, 3H, H-15), 2.49 (dd,  $^2J = 13.2$  Hz,  $^3J_{H5b,H6a} = 6.3$  Hz, 1H, H-5b), 2.35 (td,  $^2J = 12.8$  Hz,  $^3J_{H5a,H6a} = 12.8$  Hz,  $^3J_{H5a,H6b} = 6.9$  Hz, 1H, H-5a), 2.26 (tt,  $^2J = 12.6$ ,  $^3J_{H5a,H6a} = 12.6$  Hz,  $^3J_{H5b,H6a} = 6.6$  Hz,  $^3J_{H6a,H7} = 6.6$  Hz, 1H, H-6a), 2.03 – 1.97 (m, 1H, H-6b), 2.02 (s, 3H, H-14),  $^{13}\text{C}$  NMR (126 MHz,  $\text{CDCl}_3$ , T = 298 K)  $\delta$  179.6 (C-10), 170.0 (C-13), 162.9 (C-9), 153.8 (C-3), 151.1 (C-1), 144.4 (C-7a), 141.7 (C-2), 141.3 (C-12), 135.0 (C-12a), 134.9 (C-4a), 134.2 (C-11), 132.3 (C-19), 126.0 (C-1a), 118.7 (C-20), 112.3 (C-8), 107.6 (C-4), 69.9 (C-18), 61.6 (C-15), 61.5 (C-16), 56.2 (C-17), 53.0 (C-7), 38.4 (C-6), 30.1 (C-5), 23.1 (C-14).

(*S,E*)-*N*-(9-(but-2-en-1-yloxy)-1,2,3-trimethoxy-10-oxo-5,6,7,10-tetrahydrobenzo[*a*]heptalen-7-yl)acetamide (compound **3e**): Yield: 52%; HPLC Rt = HPLC Rt = 5.265 (HPLC method 1) and 11.878 (HPLC method 2), Anal. Calcd  $\text{C}_{25}\text{H}_{29}\text{NO}_6$ : C, 68.32; H, 6.65; N, 3.19. Found: C, 68.34; H, 6.64; N, 3.18; HRMS (ESI-TOF)  $m/z$ :  $[\text{M} + \text{Na}]^+$  Calcd for  $\text{C}_{25}\text{H}_{29}\text{NNaO}_6^+$  462.1888; Found 462.1889.  $^1\text{H}$  NMR (500 MHz,  $\text{CDCl}_3$ , T = 298 K)  $\delta$  7.40 (d,  $^3J_{H11,H12} = 12.8$  Hz, 1H, H-12), 7.14 (s, 1H, H-8), 7.12 (d,  $^3J_{H11,H12} = 12.5$  Hz, 1H, H-11), 6.89 (d,  $^3J_{H7,NH} = 6.4$  Hz, 1H, 7-NH), 6.55 (s, 1H, H-4), 5.87 (m, 1H, H-19), 5.73 (m, 1H, H-20), 4.75 (m, 2H, H-18), 4.58 (dt,  $^3J_{H6b,H7} = 12.4$  Hz,  $^3J_{H6a,H7} = 6.1$  Hz,  $^3J_{H7,NH} = 6.1$  Hz, 1H, H-7), 3.92 (s, 3H, H-16), 3.89 (s, 3H, H-17), 3.66 (s, 3H, H-15), 2.49 (dd,  $^2J = 13.2$  Hz,  $^3J_{H5b,H6a} = 6.2$  Hz, 1H, H-5b), 2.35 (td,  $^2J = 12.8$  Hz,  $^3J_{H5a,H6a} = 12.8$  Hz,  $^3J_{H5a,H6b} = 6.7$  Hz, 1H, H-5a), 2.26 (tt,  $^2J = 12.6$ ,  $^3J_{H5a,H6a} = 12.6$  Hz,  $^3J_{H5b,H6a} = 6.2$  Hz,  $^3J_{H6a,H7} = 6.2$  Hz, 1H, H-6a), 2.03 (s, 3H, H-14), 2.02 – 1.94 (m, 1H, H-6b), 1.71 (dd,  $^3J_{H20,H21} = 6.5$  Hz,  $^4J_{H219,H21} = 1.5$  Hz, 3H, H-21),  $^{13}\text{C}$  NMR (126 MHz,  $\text{CDCl}_3$ , T = 298 K)  $\delta$  179.6 (C-10), 169.9 (C-13), 163.1 (C-9), 153.7 (C-3), 151.1 (C-1), 144.1 (C-7a), 141.8 (C-2), 141.2 (C-12), 134.8 (C-12a), 134.7 (C-4a), 134.2 (C-11), 131.6 (C-19), 126.1 (C-1a), 124.9 (C-20), 111.8 (C-8), 107.5 (C-4), 69.8 (C-18), 61.6 (C-15), 61.5 (C-16), 56.3 (C-17), 53.0 (C-7), 38.5 (C-6), 30.0 (C-5), 23.0 (C-14), 18.0 (C-21).

(*S*)-*N*-(1,2,3-trimethoxy-10-oxo-9-(prop-2-yn-1-yloxy)-5,6,7,10-tetrahydrobenzo[*a*]heptalen-7-yl)acetamide (compound **3f**): Yield: 52%; HPLC Rt = 6.591 (HPLC method 1) and 10.418 (HPLC method 2), Anal. Calcd  $\text{C}_{24}\text{H}_{25}\text{NO}_6$ : C, 68.07; H, 5.95; N, 3.31. Found: C, 68.09; H, 5.94; N, 3.30; HRMS (ESI-TOF)  $m/z$ :  $[\text{M} + \text{Na}]^+$  Calcd for  $\text{C}_{24}\text{H}_{25}\text{NNaO}_6^+$  446.1574; Found 446.1575.  $^1\text{H}$  NMR (600 MHz,  $\text{CDCl}_3$ , T = 298 K)  $\delta$  7.46 (d,  $^3J_{H11,H12} = 12.8$  Hz, 1H, H-12), 7.44 (s, 1H, H-8), 7.31 (m, 1H, 7-NH), 7.16 (d,  $^3J_{H11,H12} = 12.8$  Hz, 1H, H-11), 6.59 (s, 1H, H-4), 4.98 (m, 2H, H-18), 4.65 (m, 1H, H-7), 3.94 (s, 3H, H-16), 3.91 (s, 3H, H-17), 3.68 (s, 3H, H-15), 2.57 (m, 1H, H-20), 2.51 (m, 1H, H-5b), 2.34 (m, 1H, H-5a), 2.32 (m, 1H, H-6a), 2.06 (s, 3H, H-14), 2.06 – 2.01 (m, 1H, H-6b),  $^{13}\text{C}$  NMR (151 MHz,  $\text{CDCl}_3$ , T = 298 K)  $\delta$  179.6 (C-10), 170.2 (C-13), 161.5 (C-9), 153.9 (C-3), 151.0 (C-1), 144.5 (C-7a), 141.7 (C-2), 141.6 (C-12), 136.1 (C-12a), 135.0 (C-4a), 134.6 (C-11), 125.8 (C-1a), 114.1 (C-8), 107.6 (C-4), 77.6 (C-19), 76.9 (C-20), 61.6 (C-15), 61.5 (C-16), 56.7 (C-18), 56.2 (C-17), 52.8 (C-7), 38.4 (C-6), 30.0 (C-5), 23.2 (C-14).

(*S*)-ethyl 2-((7-acetamido-1,2,3-trimethoxy-10-oxo-5,6,7,10-tetrahydrobenzo[*a*]heptalen-9-yl)oxy)acetate (compound **3g**): Yield: 44%; HPLC Rt = 4.838 (HPLC method 1) and 11.258 (HPLC method 2), Anal. Calcd  $\text{C}_{25}\text{H}_{29}\text{NO}_8$ : C, 63.68; H, 6.20; N, 2.97. Found: C, 63.69; H, 6.18; N, 2.98; HRMS (ESI-TOF)  $m/z$ :  $[\text{M} + \text{Na}]^+$  Calcd for  $\text{C}_{25}\text{H}_{29}\text{NNaO}_8^+$  494.1785; Found

494.1784.  $^1\text{H}$  NMR (400 MHz,  $\text{CDCl}_3$ , T = 298 K)  $\delta$  7.41 (d,  $^3J_{\text{H11,H12}} = 12.8$  Hz, 1H, H-12), 7.28 (s, 1H, H-8), 7.13 (d,  $^3J_{\text{H11,H12}} = 12.8$  Hz, 1H, H-11), 6.74 (d,  $^3J_{\text{H7,NH}} = 6.5$  Hz, 1H, 7-NH), 6.54 (s, 1H, H-4), 4.94 (d,  $^2J = 16.3$  Hz, 1H, H-18a), 4.81 (d,  $^2J = 16.3$  Hz, 1H, H-18b), 4.55 (dt,  $^3J_{\text{H6b,H7}} = 12.2$  Hz,  $^3J_{\text{H6a,H7}} = 6.0$  Hz,  $^3J_{\text{H7,NH}} = 6.0$  Hz, 1H, H-7), 4.20 (q,  $^3J_{\text{H20,H21}} = 7.1$  Hz, 1H, H-20a), 4.20 (q,  $^3J_{\text{H20,H21}} = 7.1$  Hz, 1H, H-20b), 3.90 (s, 3H, H-16), 3.88 (s, 3H, H-17), 3.64 (s, 3H, H-15), 2.46 (m, 1H, H-5b), 2.28 (m, 1H, H-5a), 2.23 (m, 1H, H-6a), 2.03 (s, 3H, H-14), 1.94 (m, 1H, H-6b), 1.23 (t,  $^3J_{\text{H20,H21}} = 7.2$  Hz, 3H, H-21),  $^{13}\text{C}$  NMR (101 MHz,  $\text{CDCl}_3$ , T = 298 K)  $\delta$  179.7 (C-10), 170.1 (C-13), 169.1 (C-19), 162.2 (C-9), 153.9 (C-3), 151.1 (C-1), 143.9 (C-7a), 141.7 (C-2), 141.4 (C-12), 136.9 (C-12a), 135.6 (C-4a), 134.9 (C-11), 125.7 (C-1a), 116.8 (C-8), 107.6 (C-4), 66.8 (C-18), 61.6 (C-20), 61.6 (C-15), 61.5 (C-16), 56.2 (C-17), 52.6 (C-7), 38.5 (C-6), 30.0 (C-5), 23.0 (C-14), 14.2 (C-21).

(S)-N-(9-(but-3-en-1-yloxy)-1,2,3-trimethoxy-10-oxo-5,6,7,10-tetrahydrobenzo[a]heptalen-7-yl)acetamide (compound **3h**): Yield: 49%; HPLC Rt = 5.272 (HPLC method 1) and 11.891 (HPLC method 2), Anal. Calcd  $\text{C}_{25}\text{H}_{29}\text{NO}_6$ : C, 68.32; H, 6.65; N, 3.19. Found: C, 68.31; H, 6.67; N, 3.17; HRMS (ESI-TOF) m/z:  $[\text{M} + \text{Na}]^+$  Calcd for  $\text{C}_{25}\text{H}_{29}\text{NNaO}_6^+$  462.1887; Found 462.1885.  $^1\text{H}$  NMR (400 MHz,  $\text{CDCl}_3$ , T = 298 K)  $\delta$  7.39 (d,  $^3J_{\text{H11,H12}} = 12.8$  Hz, 1H, H-12), 7.13 (d,  $^3J_{\text{H11,H12}} = 12.8$  Hz, 1H, H-11), 7.05 (s, 1H, H-8), 6.56 (s, 1H, H-4), 6.38 (d,  $^3J_{\text{H7,NH}} = 6.2$  Hz, 1H, 7-NH), 5.90 (ddt,  $^3J_{\text{H20,H21trans}} = 17.1$  Hz,  $^3J_{\text{H20,H21cis}} = 10.3$  Hz,  $^3J_{\text{H19,H20}} = 6.7$  Hz, 1H, H-20), 5.17 (dq,  $^2J = 1.6$  Hz,  $^3J_{\text{H20,H21}} = 7.2$  Hz,  $^4J_{\text{H20,H21}} = 1.6$  Hz, 1H, H-21a), 5.11 (dq,  $^2J = 1.2$  Hz,  $^3J_{\text{H20,H21}} = 10.2$  Hz,  $^4J_{\text{H20,H21}} = 1.2$  Hz, 1H, H-21b), 4.58 (dt,  $^3J_{\text{H6b,H7}} = 12.2$  Hz,  $^3J_{\text{H6a,H7}} = 6.1$  Hz,  $^3J_{\text{H7,NH}} = 6.1$  Hz, 1H, H-7), 4.15 (m, 2H, H-18), 3.93 (s, 3H, H-16), 3.90 (s, 3H, H-17), 3.66 (s, 3H, H-15), 2.65 (m, 2H, H-19), 2.51 (dd,  $^2J = 12.1$  Hz,  $^3J_{\text{H5,H6}} = 5.3$  Hz, 1H, H-5b), 2.37 (td,  $^2J = 12.6$  Hz,  $^3J_{\text{H5,H6}} = 12.6$  Hz,  $^3J_{\text{H5,H6}} = 6.9$  Hz, 1H, H-5a), 2.30 (tt,  $^2J = 12.6$  Hz,  $^3J_{\text{H5,H6}} = 12.6$  Hz,  $^3J_{\text{H5,H6}} = 6.5$  Hz,  $^3J_{\text{H6,H7}} = 6.5$  Hz, 1H, H-6a), 2.04 (s, 3H, H-14), 1.98 (m, 1H, H-6b),  $^{13}\text{C}$  NMR (101 MHz,  $\text{CDCl}_3$ , T = 298 K)  $\delta$  179.6 (C-10), 169.8 (C-13), 163.4 (C-9), 153.7 (C-3), 151.2 (C-1), 143.5 (C-7a), 141.8 (C-2), 141.1 (C-12), 134.8 (C-12a), 134.7 (C-4a), 134.5 (C-11), 133.8 (C-20), 126.1 (C-1a), 117.8 (C-21), 111.6 (C-8), 107.5 (C-4), 66.5 (C-18), 61.6 (C-15), 61.6 (C-16), 56.3 (C-17), 53.0 (C-7), 38.5 (C-6), 33.3 (C-19), 30.0 (C-5), 23.1 (C-14).

(S)-N-(9-(3-azidopropoxy)-1,2,3-trimethoxy-10-oxo-5,6,7,10-tetrahydrobenzo[a]heptalen-7-yl)acetamide (compound **3i**): Yield: 51%; HPLC Rt = 5.332 (HPLC method 1) and 12.171 (HPLC method 2), Anal. Calcd  $\text{C}_{24}\text{H}_{28}\text{N}_4\text{O}_6$ : C, 61.53; H, 6.02; N, 11.96. Found: C, 61.55; H, 6.02; N, 11.95; HRMS (ESI-TOF) m/z:  $[\text{M} + \text{Na}]^+$  Calcd for  $\text{C}_{24}\text{H}_{28}\text{N}_4\text{NaO}_6^+$  491.1901; Found 491.1900.  $^1\text{H}$  NMR (400 MHz,  $\text{CDCl}_3$ , T = 298 K)  $\delta$  7.40 (d,  $^3J_{\text{H11,H12}} = 12.8$  Hz, 1H, H-12), 7.12 (d,  $^3J_{\text{H11,H12}} = 12.9$  Hz, 1H, H-11), 7.10 (s, 1H, H-8), 6.68 (d,  $^3J_{\text{H7,NH}} = 6.3$  Hz, 1H, 7-NH), 6.56 (s, 1H, H-4), 4.59 (dt,  $^3J_{\text{H6b,H7}} = 12.3$  Hz,  $^3J_{\text{H6a,H7}} = 6.2$  Hz,  $^3J_{\text{H7,NH}} = 6.2$  Hz, 1H, H-7), 4.22 (dt,  $^2J = 9.9$  Hz,  $^3J_{\text{H18,H19}} = 6.3$  Hz, 1H, H-18a), 4.14 (dt,  $^2J = 9.8$  Hz,  $^3J_{\text{H18,H19}} = 5.9$  Hz, 1H, H-18b), 3.92 (s, 3H, H-16), 3.89 (s, 3H, H-17), 3.65 (s, 3H, H-15), 3.57 (m, 2H, H-20), 2.51 (dd,  $^2J = 12.7$  Hz,  $^3J_{\text{H5,H6}} = 5.7$  Hz, 1H, H-5b), 2.37 (td,  $^2J = 12.7$  Hz,  $^3J_{\text{H5,H6}} = 12.7$  Hz,  $^3J_{\text{H5,H6}} = 6.8$  Hz, 1H, H-5a), 2.29 (tt,  $^2J = 12.6$  Hz,  $^3J_{\text{H5,H6}} = 12.6$  Hz,  $^3J_{\text{H5,H6}} = 6.3$  Hz,  $^3J_{\text{H6,H7}} = 6.3$  Hz, 1H, H-6a), 2.13 (m, 2H, H-19), 2.04 (s, 3H, H-14), 2.0 (m, 1H, H-6b),  $^{13}\text{C}$  NMR (101 MHz,  $\text{CDCl}_3$ , T = 298 K)  $\delta$  179.5 (C-10), 169.9 (C-13), 163.1 (C-9), 153.8 (C-



3), 151.1 (C-1), 143.9 (C-7a), 141.7 (C-2), 141.3 (C-12), 135.1 (C-12a), 134.8 (C-4a), 134.4 (C-11), 125.9 (C-1a), 111.8 (C-8), 107.5 (C-4), 66.8 (C-18), 61.6 (C-15), 61.5 (C-16), 56.2 (C-17), 53.0 (C-7), 48.2 (C-20), 38.5 (C-6), 30.0 (C-5), 28.5 (C-19), 23.0 (C-14).

(*S*)-*N*-(1,2,3-trimethoxy-10-oxo-9-((4-vinylbenzyl)oxy)-5,6,7,10-tetrahydrobenzo[*a*]heptalen-7-yl)acetamide (compound **3j**): Yield: 51%; HPLC Rt = 8.872 (HPLC method 1) and 15.745 (HPLC method 2), Anal. Calcd C<sub>30</sub>H<sub>31</sub>NO<sub>6</sub>: C, 71.84; H, 6.23; N, 2.79. Found: C, 71.85; H, 6.21; N, 2.80; HRMS (ESI-TOF) *m/z*: [M + Na]<sup>+</sup> Calcd for C<sub>30</sub>H<sub>31</sub>NNaO<sub>6</sub><sup>+</sup> 524.2044; Found 524.2042. <sup>1</sup>H NMR (401 MHz, CDCl<sub>3</sub>, T = 298 K) δ 7.41 (d, <sup>3</sup>*J*<sub>H11,H12</sub> = 12.8 Hz, 1H, H-12), 7.34 (d, <sup>3</sup>*J*<sub>H20,H21</sub> = 8.6 Hz, 1H, H-21), 7.34 (d, <sup>3</sup>*J*<sub>H23,H24</sub> = 8.6 Hz, 1H, H-23), 7.31 (d, <sup>3</sup>*J*<sub>H20,H21</sub> = 8.8 Hz, 1H, H-20), 7.31 (d, <sup>3</sup>*J*<sub>H23,H24</sub> = 8.8 Hz, 1H, H-24), 7.19 (s, 1H, H-8), 7.13 (d, <sup>3</sup>*J*<sub>H11,H12</sub> = 12.7 Hz, 1H, H-11), 7.08 (d, <sup>3</sup>*J*<sub>H7,NH</sub> = 6.5 Hz, 1H, 7-NH), 6.63 (dd, <sup>3</sup>*J*<sub>H25,H26</sub> = 17.5 Hz, <sup>3</sup>*J*<sub>H25,H26</sub> = 10.9 Hz, 1H, H-25), 6.52 (s, 1H, H-4), 4.50 (dt, <sup>3</sup>*J*<sub>H6b,H7</sub> = 12.6 Hz, <sup>3</sup>*J*<sub>H6a,H7</sub> = 6.4 Hz, <sup>3</sup>*J*<sub>H7,NH</sub> = 6.4 Hz, 1H, H-7), 5.69 (dd, <sup>2</sup>*J* = 1.0 Hz, <sup>3</sup>*J*<sub>H25,H26</sub> = 17.7 Hz, 1H, H-26a), 5.28 (d, <sup>2</sup>*J* = 13.0 Hz, 1H, H-18a), 5.23 (d, <sup>2</sup>*J* = 12.9 Hz, 1H, H-18b), 5.21 (dd, <sup>2</sup>*J* = 0.9 Hz, <sup>3</sup>*J*<sub>H25,H26</sub> = 10.9 Hz, 1H, H-26b), 3.91 (s, 3H, H-16), 3.88 (s, 3H, H-17), 3.64 (s, 3H, H-15), 2.40 (dd, <sup>2</sup>*J* = 13.3 Hz, <sup>3</sup>*J*<sub>H5,H6</sub> = 6.3 Hz, 1H, H-5b), 2.37 (td, <sup>2</sup>*J* = 13.0 Hz, <sup>3</sup>*J*<sub>H5,H6</sub> = 13.0 Hz, <sup>3</sup>*J*<sub>H5,H6</sub> = 7.2 Hz, 1H, H-5a), 2.12 (tt, <sup>2</sup>*J* = 12.6 Hz, <sup>3</sup>*J*<sub>H5,H6</sub> = 12.6 Hz, <sup>3</sup>*J*<sub>H5,H6</sub> = 6.0 Hz, <sup>3</sup>*J*<sub>H6,H7</sub> = 6.0 Hz, 1H, H-6a), 1.87 (m, 1H, H-6b), 1.78 (s, 3H, H-14), <sup>13</sup>C NMR (101 MHz, CDCl<sub>3</sub>, T = 298 K) δ 179.6 (C-10), 169.9 (C-13), 163.0 (C-9), 153.7 (C-3), 151.1 (C-1), 144.4 (C-7a), 141.7 (C-2), 141.3 (C-12), 137.7 (C-22), 136.2 (C-25), 135.3 (C-12a), 135.2 (C-19), 134.9 (C-4a), 134.3 (C-11), 127.4 (C-21), 127.4 (C-23), 126.6 (C-20), 126.6 (C-26), 125.9 (C-1a), 114.6 (C-26), 112.9 (C-8), 107.6 (C-4), 70.8 (C-18), 61.6 (C-15), 61.5 (C-16), 56.2 (C-17), 52.8 (C-7), 38.3 (C-6), 30.0 (C-5), 22.8 (C-14).

(*S*)-*N*-(10-(benzyloxy)-1,2,3-trimethoxy-9-oxo-5,6,7,9-tetrahydrobenzo[*a*]heptalen-7-yl)acetamide (compound **4a**): Yield: 40%; HPLC Rt = 7.698 (HPLC method 1) and 14.598 (HPLC method 2), Anal. Calcd C<sub>28</sub>H<sub>29</sub>NO<sub>6</sub>: C, 70.72; H, 6.15; N, 2.95. Found: C, 70.70; H, 6.14; N, 2.97; HRMS (ESI-TOF) *m/z*: [M + Na]<sup>+</sup> Calcd for C<sub>28</sub>H<sub>29</sub>NNaO<sub>6</sub><sup>+</sup> 498.1887; Found 498.1886. <sup>1</sup>H NMR (500 MHz, CDCl<sub>3</sub>, T = 298 K) δ 8.0 (d, <sup>3</sup>*J*<sub>H7,NH</sub> = 6.4 Hz, 1H, 7-NH), 7.60 (s, 1H, H-8), 7.42 (d, <sup>3</sup>*J*<sub>H23,H24</sub> = 6.9 Hz, 1H, H-24), 7.42 (d, <sup>3</sup>*J*<sub>H20,H21</sub> = 6.9 Hz, 1H, H-20), 7.36 (t, <sup>3</sup>*J*<sub>H20,H21</sub> = 7.4 Hz, <sup>3</sup>*J*<sub>H21,H20</sub> = 7.4 Hz, 1H, H-21), 7.36 (t, <sup>3</sup>*J*<sub>H22,H23</sub> = 7.4 Hz, <sup>3</sup>*J*<sub>H23,H24</sub> = 7.4 Hz, 1H, H-23), 7.30 (m, 1H, H-22), 7.21 (d, <sup>3</sup>*J*<sub>H11,H12</sub> = 10.8 Hz, 1H, H-12), 6.89 (d, <sup>3</sup>*J*<sub>H11,H12</sub> = 10.8 Hz, 1H, H-11), 6.50 (s, 1H, H-4), 5.35 (d, <sup>2</sup>*J* = 13.0 Hz, 1H, H-18a), 5.28 (d, <sup>2</sup>*J* = 12.9 Hz, 1H, H-18b), 4.62 (dt, <sup>3</sup>*J*<sub>H6b,H7</sub> = 12.1 Hz, <sup>3</sup>*J*<sub>H6a,H7</sub> = 6.4 Hz, <sup>3</sup>*J*<sub>H7,NH</sub> = 6.4 Hz, 1H, H-7), 3.91 (s, 3H, H-16), 3.89 (s, 3H, H-17), 3.61 (s, 3H, H-15), 2.48 (dd, <sup>2</sup>*J* = 13.0 Hz, <sup>3</sup>*J*<sub>H5b,H6a</sub> = 5.9 Hz, 1H, H-5b), 2.36 (td, <sup>2</sup>*J* = 12.8 Hz, <sup>3</sup>*J*<sub>H5a,H6a</sub> = 12.8 Hz, <sup>3</sup>*J*<sub>H5a,H6b</sub> = 6.2 Hz, 1H, H-5a), 2.28 (tt, <sup>2</sup>*J* = 12.8, <sup>3</sup>*J*<sub>H5a,H6a</sub> = 12.8 Hz, <sup>3</sup>*J*<sub>H5b,H6a</sub> = 6.3 Hz, <sup>3</sup>*J*<sub>H6a,H7</sub> = 6.3 Hz, 1H, H-6a), 1.91 (m, 1H, H-6b), 1.97 (s, 3H, H-14), <sup>13</sup>C NMR (126 MHz, CDCl<sub>3</sub>, T = 298 K) δ 179.8 (C-9), 170.2 (C-13), 163.1 (C-10), 153.6 (C-3), 152.2 (C-7a), 151.3 (C-1), 141.7 (C-2), 137.2 (C-12a), 135.4 (C-12), 135.4 (C-19), 134.4 (C-4a), 131.0 (C-8), 128.9 (C-21 + C-23), 128.4 (C-22), 127.2 (C-20 + C-24), 125.7 (C-1a), 115.1 (C-11), 107.4 (C-4), 71.1 (C-18), 61.7 (C-15), 61.5 (C-16), 56.2 (C-17), 52.6 (C-7), 36.5 (C-6), 30.0 (C-5), 22.9 (C-14).

(*S*)-*N*-(10-((4-iodobenzyl)oxy)-1,2,3-trimethoxy-9-oxo-5,6,7,9-tetrahydrobenzo[*a*]heptalen-7-yl)acetamide (compound **4b**): Yield: 42%; HPLC Rt = 14.351 (HPLC method 1) and 20.845 (HPLC method 2), Anal. Calcd C<sub>28</sub>H<sub>28</sub>INO<sub>6</sub>: C, 55.92; H, 4.69; I, 21.10; N, 2.33. Found C, 55.91; H, 4.70; I, 20.12; N, 2.34; HRMS (ESI-TOF) m/z: [M + Na]<sup>+</sup> Calcd for C<sub>28</sub>H<sub>28</sub>INNaO<sub>6</sub><sup>+</sup> 624.0854; Found 624.0853. <sup>1</sup>H NMR (401 MHz, CDCl<sub>3</sub>, T = 298 K) δ 7.70 (d, <sup>3</sup>J<sub>H20,H21</sub> = 8.3 Hz, 1H, H-21), 7.70 (d, <sup>3</sup>J<sub>H22,H23</sub> = 8.3 Hz, 1H, H-23), 7.63 (d, <sup>3</sup>J<sub>H7,NH</sub> = 6.4 Hz, 1H, 7-NH), 7.55 (s, 1H, H-8), 7.21 (d, <sup>3</sup>J<sub>H11,H12</sub> = 11.2 Hz, 1H, H-12), 7.18 (d, <sup>3</sup>J<sub>H23,H24</sub> = 8.4 Hz, 1H, H-24), 7.18 (d, <sup>3</sup>J<sub>H20,H21</sub> = 8.4 Hz, 1H, H-20), 6.84 (d, <sup>3</sup>J<sub>H11,H12</sub> = 10.8 Hz, 1H, H-11), 6.51 (s, 1H, H-4), 5.28 (d, <sup>2</sup>J = 13.1 Hz, 1H, H-18a), 5.20 (d, <sup>2</sup>J = 13.0 Hz, 1H, H-18b), 4.62 (dt, <sup>3</sup>J<sub>H6b,H7</sub> = 11.9 Hz, <sup>3</sup>J<sub>H6a,H7</sub> = 6.3 Hz, <sup>3</sup>J<sub>H7,NH</sub> = 6.3 Hz, 1H, H-7), 3.92 (s, 3H, H-16), 3.89 (s, 3H, H-17), 3.61 (s, 3H, H-15), 2.50 (dd, <sup>2</sup>J = 12.9 Hz, <sup>3</sup>J<sub>H5b,H6a</sub> = 5.8 Hz, 1H, H-5b), 2.36 (td, <sup>2</sup>J = 12.8 Hz, <sup>3</sup>J<sub>H5a,H6a</sub> = 12.8 Hz, <sup>3</sup>J<sub>H5a,H6b</sub> = 6.2 Hz, 1H, H-5a), 2.27 (tt, <sup>2</sup>J = 12.4, <sup>3</sup>J<sub>H5a,H6a</sub> = 12.4 Hz, <sup>3</sup>J<sub>H5b,H6a</sub> = 6.1 Hz, <sup>3</sup>J<sub>H6a,H7</sub> = 6.1 Hz, 1H, H-6a), 1.97 (s, 3H, H-14), 1.89 (m, 1H, H-6b), <sup>13</sup>C NMR (101 MHz, CDCl<sub>3</sub>, T = 298 K) δ 179.7 (C-9), 170.0 (C-13), 162.8 (C-10), 153.7 (C-3), 152.0 (C-7a), 151.3 (C-1), 141.8 (C-2), 138.0 (C-21 + C-23), 137.4 (C-12a), 135.2 (C-12), 135.2 (C-19), 134.3 (C-4a), 131.2 (C-8), 129.1 (C-20 + C-24), 125.6 (C-1a), 115.1 (C-11), 107.5 (C-4), 93.9 (C-22), 70.4 (C-18), 61.7 (C-15), 61.5 (C-16), 56.2 (C-17), 52.6 (C-7), 36.6 (C-6), 30.0 (C-5), 23.0 (C-14).

(*S,E*)-*N*-(10-(cinnamyloxy)-1,2,3-trimethoxy-9-oxo-5,6,7,9-tetrahydrobenzo[*a*]heptalen-7-yl)acetamide (compound **4c**): Yield: 39%; HPLC Rt = 10.505 (HPLC method 1) and 17.945 (HPLC method 2), Anal. Calcd C<sub>30</sub>H<sub>31</sub>NO<sub>6</sub>: C, 71.84; H, 6.23; N, 2.79. Found C, 71.85; H, 6.21; N, 2.80; HRMS (ESI-TOF) m/z: [M + Na]<sup>+</sup> Calcd for C<sub>30</sub>H<sub>31</sub>NNaO<sub>6</sub><sup>+</sup> 524.2044; Found 524.2046. <sup>1</sup>H NMR (500 MHz, CDCl<sub>3</sub>, T = 298 K) δ 7.54 (s, 1H, H-8), 7.41 (m, 1H, H-26), 7.41 (m, 1H, H-22), 7.38 (d, <sup>3</sup>J<sub>H7,NH</sub> = 6.9 Hz, 1H, 7-NH), 7.33 (m, 1H, H-25), 7.33 (m, 1H, H-23), 7.29 (d, <sup>3</sup>J<sub>H11,H12</sub> = 10.7 Hz, 1H, H-12), 7.27 (m, 1H, H-24), 6.95 (d, <sup>3</sup>J<sub>H11,H12</sub> = 10.8 Hz, 1H, H-11), 6.76 (m, 1H, H-20), 6.51 (s, 1H, H-4), 6.44 (dt, <sup>3</sup>J<sub>H19,H20</sub> = 16.0 Hz, <sup>3</sup>J<sub>H18,H19</sub> = 5.9 Hz, 1H, H-19), 4.95 (ddd, <sup>2</sup>J = 13.1 Hz, <sup>3</sup>J<sub>H18,H19</sub> = 5.8 Hz, <sup>4</sup>J<sub>H18,H20</sub> = 1.7 Hz, 1H, H-18a), 4.91 (ddd, <sup>2</sup>J = 13.1 Hz, <sup>3</sup>J<sub>H18,H19</sub> = 6.1 Hz, <sup>4</sup>J<sub>H18,H20</sub> = 1.4 Hz, 1H, H-18b), 4.65 (dt, <sup>3</sup>J<sub>H6b,H7</sub> = 12.2 Hz, <sup>3</sup>J<sub>H6a,H7</sub> = 6.4 Hz, <sup>3</sup>J<sub>H7,NH</sub> = 6.4 Hz, 1H, H-7), 3.94 (s, 3H, H-16), 3.90 (s, 3H, H-17), 3.65 (s, 3H, H-15), 2.51 (dd, <sup>2</sup>J = 13.3 Hz, <sup>3</sup>J<sub>H5b,H6a</sub> = 6.2 Hz, 1H, H-5b), 2.40 (td, <sup>2</sup>J = 13.1 Hz, <sup>3</sup>J<sub>H5a,H6a</sub> = 13.1 Hz, <sup>3</sup>J<sub>H5a,H6b</sub> = 6.6 Hz, 1H, H-5a), 2.27 (tt, <sup>2</sup>J = 12.4, <sup>3</sup>J<sub>H5a,H6a</sub> = 12.4 Hz, <sup>3</sup>J<sub>H5b,H6a</sub> = 6.1 Hz, <sup>3</sup>J<sub>H6a,H7</sub> = 6.1 Hz, 1H, H-6a), 1.99 (s, 3H, H-14), 1.89 (td, <sup>2</sup>J = 11.7, <sup>3</sup>J<sub>H5a,H6a</sub> = 11.7 Hz, <sup>3</sup>J<sub>H5b,H6a</sub> = 6.3 Hz, 1H, H-6b), <sup>13</sup>C NMR (126 MHz, CDCl<sub>3</sub>, T = 298 K) δ 179.8 (C-9), 170.0 (C-13), 163.2 (C-10), 153.6 (C-3), 151.7 (C-7a), 151.3 (C-1), 141.8 (C-2), 136.9 (C-12a), 136.1 (C-21), 135.4 (C-12), 134.5 (C-20), 134.4 (C-4a), 131.0 (C-8), 128.8 (C-22 + 26), 128.4 (C-24), 126.8 (C-23 + C-25), 125.8 (C-1a), 122.8 (C-19), 114.4 (C-11), 107.5 (C-4), 70.2 (C-18), 61.7 (C-15), 61.5 (C-16), 56.3 (C-17), 52.6 (C-7), 36.8 (C-6), 30.0 (C-5), 23.1 (C-14).

(*S*)-*N*-(10-(allyloxy)-1,2,3-trimethoxy-9-oxo-5,6,7,9-tetrahydrobenzo[*a*]heptalen-7-yl)acetamide (compound **4d**): Yield: 41%; HPLC Rt = HPLC Rt = 4.858 (HPLC method 1) and 11.645 (HPLC method 2), Anal. Calcd C<sub>24</sub>H<sub>27</sub>NO<sub>6</sub>: C, 67.75; H, 6.40; N, 3.29. Found: C, 67.77; H, 6.39; N, 3.30; HRMS (ESI-TOF) m/z: [M + Na]<sup>+</sup> Calcd for C<sub>24</sub>H<sub>27</sub>NNaO<sub>6</sub><sup>+</sup>

448.1731; Found 448.1732. <sup>1</sup>H NMR (500 MHz, CDCl<sub>3</sub>, T = 298 K) δ 7.55 (s, 1H, H-8), 7.78 (d, <sup>3</sup>J<sub>H7,NH</sub> = 6.5 Hz, 1H, 7-NH), 7.28 (d, <sup>3</sup>J<sub>H11,H12</sub> = 10.7 Hz, 1H, H-12), 6.88 (d, <sup>3</sup>J<sub>H11,H12</sub> = 10.8 Hz, 1H, H-11), 6.52 (s, 1H, H-4), 6.04 (ddt, <sup>3</sup>J<sub>H19,H20</sub> = 17.2 Hz, <sup>3</sup>J<sub>H19,H20</sub> = 10.6 Hz, <sup>3</sup>J<sub>H18,H19</sub> = 5.3 Hz, 1H, H-19), 5.44 (dq, <sup>2</sup>J = 1.5 Hz, <sup>3</sup>J<sub>H19,H20</sub> = 10.0 Hz, <sup>4</sup>J<sub>H18,H20</sub> = 1.5 Hz, 1H, H-20a), 5.35 (dq, <sup>2</sup>J = 1.3 Hz, <sup>3</sup>J<sub>H19,H20</sub> = 17.3 Hz, <sup>4</sup>J<sub>H18,H20</sub> = 1.3 Hz, 1H, H-20b), 4.79 (m, 1H, H-18a), 4.75 (m, 1H, H-18b), 4.63 (dt, <sup>3</sup>J<sub>H6b,H7</sub> = 12.2 Hz, <sup>3</sup>J<sub>H6a,H7</sub> = 6.4 Hz, <sup>3</sup>J<sub>H7,NH</sub> = 6.4 Hz, 1H, H-7), 3.93 (s, 3H, H-16), 3.89 (s, 3H, H-17), 3.64 (s, 3H, H-15), 2.51 (dd, <sup>2</sup>J = 12.9 Hz, <sup>3</sup>J<sub>H5b,H6a</sub> = 5.7 Hz, 1H, H-5b), 2.38 (td, <sup>2</sup>J = 13.0 Hz, <sup>3</sup>J<sub>H5a,H6a</sub> = 13.0 Hz, <sup>3</sup>J<sub>H5a,H6b</sub> = 6.4 Hz, 1H, H-5a), 2.30 (tt, <sup>2</sup>J = 12.7, <sup>3</sup>J<sub>H5a,H6a</sub> = 12.7 Hz, <sup>3</sup>J<sub>H5b,H6a</sub> = 6.3 Hz, <sup>3</sup>J<sub>H6a,H7</sub> = 6.3 Hz, 1H, H-6a), 1.96 (s, 3H, H-14), 1.91 (m, 1H, H-6b), <sup>13</sup>C NMR (126 MHz, CDCl<sub>3</sub>, T = 298 K) δ 179.7 (C-9), 170.1 (C-13), 163.1 (C-10), 153.6 (C-3), 152.1 (C-7a), 151.3 (C-1), 141.8 (C-2), 137.1 (C-12a), 135.4 (C-12), 134.4 (C-4a), 131.8 (C-19), 130.9 (C-8), 125.8 (C-1a), 119.2 (C-20), 114.5 (C-11), 107.4 (C-4), 70.2 (C-18), 61.7 (C-15), 61.5 (C-16), 56.2 (C-17), 52.7 (C-7), 36.6 (C-6), 30.0 (C-5), 23.0 (C-14).

(*S,E*)-*N*-(10-(but-2-en-1-yloxy)-1,2,3-trimethoxy-9-oxo-5,6,7,9-tetrahydrobenzo[*a*]heptalen-7-yl)acetamide (compound **4e**): Yield: 39%; HPLC Rt = 5.845 (HPLC method 1) and 13.025 (HPLC method 2), Anal. Calcd C<sub>25</sub>H<sub>29</sub>NO<sub>6</sub>: C, 68.32; H, 6.65; N, 3.19. Found: C, 68.31; H, 6.67; N, 3.20; HRMS (ESI-TOF) *m/z*: [M + Na]<sup>+</sup> Calcd for C<sub>25</sub>H<sub>29</sub>NNaO<sub>6</sub><sup>+</sup> 462.1888; Found 462.1886. <sup>1</sup>H NMR (500 MHz, CDCl<sub>3</sub>, T = 298 K) δ 7.76 (d, <sup>3</sup>J<sub>H7,NH</sub> = 6.6 Hz, 1H, 7-NH), 7.54 (s, 1H, H-8), 7.28 (d, <sup>3</sup>J<sub>H11,H12</sub> = 10.8 Hz, 1H, H-12), 6.88 (d, <sup>3</sup>J<sub>H11,H12</sub> = 11.0 Hz, 1H, H-11), 6.52 (s, 1H, H-4), 5.87 (m, 1H, H-19), 5.75 (m, 1H, H-20), 4.63 (dt, <sup>3</sup>J<sub>H6b,H7</sub> = 12.1 Hz, <sup>3</sup>J<sub>H6a,H7</sub> = 6.4 Hz, <sup>3</sup>J<sub>H7,NH</sub> = 6.4 Hz, 1H, H-7), 4.22 (d, <sup>3</sup>J<sub>H18,H19</sub> = 6.1 Hz, 2H, H-18), 3.93 (s, 3H, H-16), 3.89 (s, 3H, H-17), 3.64 (s, 3H, H-15), 2.50 (dd, <sup>2</sup>J = 13.3 Hz, <sup>3</sup>J<sub>H5b,H6a</sub> = 6.0 Hz, 1H, H-5b), 2.38 (td, <sup>2</sup>J = 13.0 Hz, <sup>3</sup>J<sub>H5a,H6a</sub> = 13.0 Hz, <sup>3</sup>J<sub>H5a,H6b</sub> = 6.4 Hz, 1H, H-5a), 2.30 (tt, <sup>2</sup>J = 12.8, <sup>3</sup>J<sub>H5a,H6a</sub> = 12.8 Hz, <sup>3</sup>J<sub>H5b,H6a</sub> = 6.3 Hz, <sup>3</sup>J<sub>H6a,H7</sub> = 6.3 Hz, 1H, H-6a), 1.96 (s, 3H, H-14), 1.89 (m, 1H, H-6b), 1.75 (m, 3H, H-21), <sup>13</sup>C NMR (126 MHz, CDCl<sub>3</sub>, T = 298 K) δ 179.8 (C-9), 170.1 (C-13), 163.4 (C-10), 153.6 (C-3), 151.9 (C-7a), 151.3 (C-1), 141.8 (C-2), 136.7 (C-12a), 135.5 (C-12), 134.4 (C-4a), 132.2 (C-19), 130.7 (C-8), 125.8 (C-1a), 124.6 (C-20), 114.2 (C-11), 107.4 (C-4), 70.2 (C-18), 61.7 (C-15), 61.5 (C-16), 56.2 (C-17), 52.7 (C-7), 36.7 (C-6), 30.0 (C-5), 23.0 (C-14), 18.0 (C-21).

(*S*)-*N*-(1,2,3-trimethoxy-9-oxo-10-(prop-2-yn-1-yloxy)-5,6,7,9-tetrahydrobenzo[*a*]heptalen-7-yl)acetamide (compound **4f**): Yield: 41%; HPLC Rt = 5.591 (HPLC method 1) and 11.065 (HPLC method 2), Anal. Calcd C<sub>24</sub>H<sub>25</sub>NO<sub>6</sub>: C, 68.07; H, 5.95; N, 3.31. Found: C, 68.06; H, 5.97; N, 3.32; HRMS (ESI-TOF) *m/z*: [M + Na]<sup>+</sup> Calcd for C<sub>24</sub>H<sub>25</sub>NNaO<sub>6</sub><sup>+</sup> 446.1574; Found 446.1572. <sup>1</sup>H NMR (600 MHz, CDCl<sub>3</sub>, T = 298 K) δ 7.90 (d, <sup>3</sup>J<sub>H7,NH</sub> = 6.4 Hz, 1H, 7-NH), 7.58 (s, 1H, H-8), 7.34 (d, <sup>3</sup>J<sub>H11,H12</sub> = 10.6 Hz, 1H, H-12), 7.11 (d, <sup>3</sup>J<sub>H11,H12</sub> = 10.6 Hz, 1H, H-11), 6.53 (s, 1H, H-4), 4.97 (dd, <sup>2</sup>J = 16.2 Hz, <sup>4</sup>J<sub>H18,H20</sub> = 2.4 Hz, 1H, H-18a), 4.91 (dd, <sup>2</sup>J = 16.2 Hz, <sup>4</sup>J<sub>H18,H20</sub> = 2.4 Hz, 1H, H-18b), 4.64 (dt, <sup>3</sup>J<sub>H6b,H7</sub> = 11.9 Hz, <sup>3</sup>J<sub>H6a,H7</sub> = 6.4 Hz, <sup>3</sup>J<sub>H7,NH</sub> = 6.4 Hz, 1H, H-7), 3.94 (s, 3H, H-16), 3.91 (s, 3H, H-17), 3.66 (s, 3H, H-15), 2.58 (t, <sup>4</sup>J<sub>H18,H20</sub> = 2.4 Hz, 1H, H-20), 2.53 (dd, <sup>2</sup>J = 13.6 Hz, <sup>3</sup>J<sub>H5b,H6a</sub> = 5.5 Hz, 1H, H-5b), 2.39 (td, <sup>2</sup>J = 13.1 Hz, <sup>3</sup>J<sub>H5a,H6a</sub> = 13.1 Hz, <sup>3</sup>J<sub>H5a,H6b</sub> = 6.5 Hz, 1H, H-5a), 2.32 (tt, <sup>2</sup>J = 12.9, <sup>3</sup>J<sub>H5a,H6a</sub> = 12.9 Hz, <sup>3</sup>J<sub>H5b,H6a</sub> = 6.3 Hz, <sup>3</sup>J<sub>H6a,H7</sub> = 6.3 Hz, 1H, H-6a), 1.97 (s, 3H, H-14), 1.93 (m, 1H, H-

6b),  $^{13}\text{C}$  NMR (151 MHz,  $\text{CDCl}_3$ , T = 299 K)  $\delta$  179.7 (C-9), 170.2 (C-13), 161.7 (C-10), 153.8 (C-3), 152.5 (C-7a), 151.3 (C-1), 141.8 (C-2), 138.1 (C-12a), 135.3 (C-12), 134.3 (C-4a), 77.4 (C-19), 131.4 (C-8), 125.6 (C-1a), 76.9 (C-20), 115.6 (C-11), 107.5 (C-4), 56.8 (C-18), 61.7 (C-15), 61.5 (C-16), 56.3 (C-17), 52.7 (C-7), 36.5 (C-6), 30.0 (C-5), 23.0 (C-14).

(S)-ethyl 2-((7-acetamido-1,2,3-trimethoxy-9-oxo-5,6,7,9-tetrahydrobenzo[*a*]heptalen-10-yl)oxy)acetate (compound **4g**): Yield: 37%; HPLC Rt = 4.838 (HPLC method 1) and 11.785 (HPLC method 2), Anal. Calcd  $\text{C}_{25}\text{H}_{29}\text{NO}_8$ : C, 63.68; H, 6.20; N, 2.97. Found: C, 63.66; H, 6.22; N, 2.96; HRMS (ESI-TOF)  $m/z$ :  $[\text{M} + \text{Na}]^+$  Calcd for  $\text{C}_{25}\text{H}_{29}\text{NNaO}_8^+$  494.1785; Found 494.1787.  $^1\text{H}$  NMR (400 MHz,  $\text{CDCl}_3$ , T = 298 K)  $\delta$  7.67 (d,  $^3J_{\text{H}7,\text{NH}} = 6.6$  Hz, 1H, 7-NH), 7.55 (s, 1H, H-8), 7.26 (d,  $^3J_{\text{H}11,\text{H}12} = 10.8$  Hz, 1H, H-12), 6.82 (d,  $^3J_{\text{H}11,\text{H}12} = 10.8$  Hz, 1H, H-11), 6.52 (s, 1H, H-4), 4.90 (dd,  $^2J = 16.2$  Hz, 1H, H-18a), 4.83 (dd,  $^2J = 16.4$  Hz, 1H, H-18b), 4.63 (dt,  $^3J_{\text{H}6b,\text{H}7} = 12.1$  Hz,  $^3J_{\text{H}6a,\text{H}7} = 6.4$  Hz,  $^3J_{\text{H}7,\text{NH}} = 6.4$  Hz, 1H, H-7), 4.27 (q,  $^3J_{\text{H}20,\text{H}21} = 7.2$  Hz, 1H, H-20a), 4.26 (q,  $^3J_{\text{H}20,\text{H}21} = 7.1$  Hz, 1H, H-20b), 3.92 (s, 3H, H-16), 3.89 (s, 3H, H-17), 3.63 (s, 3H, H-15), 2.52 (dd,  $^2J = 13.0$  Hz,  $^3J_{\text{H}5b,\text{H}6a} = 5.8$  Hz, 1H, H-5b), 2.39 (td,  $^2J = 12.9$  Hz,  $^3J_{\text{H}5a,\text{H}6a} = 12.9$  Hz,  $^3J_{\text{H}5a,\text{H}6b} = 6.3$  Hz, 1H, H-5a), 2.28 (tt,  $^2J = 12.8$ ,  $^3J_{\text{H}5a,\text{H}6a} = 12.8$  Hz,  $^3J_{\text{H}5b,\text{H}6a} = 6.1$  Hz,  $^3J_{\text{H}6a,\text{H}7} = 6.1$  Hz, 1H, H-6a), 1.97 (s, 3H, H-14), 1.89 (m, 1H, H-6b), 1.28 (t,  $^3J_{\text{H}20,\text{H}21} = 7.1$  Hz, 3H, H-21),  $^{13}\text{C}$  NMR (101 MHz,  $\text{CDCl}_3$ , T = 298 K)  $\delta$  179.5 (C-9), 170.1 (C-13), 167.8 (C-19), 162.2 (C-10), 153.7 (C-3), 152.5 (C-7a), 151.3 (C-1), 141.7 (C-2), 138.5 (C-12a), 135.1 (C-12), 134.3 (C-4a), 131.9 (C-8), 125.5 (C-1a), 116.3 (C-11), 107.4 (C-4), 66.1 (C-18), 61.8 (C-20), 61.7 (C-15), 61.5 (C-16), 52.6 (C-7), 56.2 (C-17), 36.6 (C-6), 30.0 (C-5), 23.0 (C-14), 14.3 (C-21).

(S)-*N*-(10-(but-3-en-1-yloxy)-1,2,3-trimethoxy-9-oxo-5,6,7,9-tetrahydrobenzo[*a*]heptalen-7-yl)acetamide (compound **4h**): Yield: 40%; HPLC Rt = 5.658 (HPLC method 1) and 12.731 (HPLC method 2), Anal. Calcd  $\text{C}_{25}\text{H}_{29}\text{NO}_6$ : C, 68.32; H, 6.65; N, 3.19. Found: C, 68.30; H, 6.66; N, 3.18; HRMS (ESI-TOF)  $m/z$ :  $[\text{M} + \text{Na}]^+$  Calcd for  $\text{C}_{25}\text{H}_{29}\text{NNaO}_6^+$  462.1887; Found 462.1883.  $^1\text{H}$  NMR (401 MHz,  $\text{CDCl}_3$ , T = 298 K)  $\delta$  7.76 (d,  $^3J_{\text{H}7,\text{NH}} = 6.6$  Hz, 1H, 7-NH), 7.54 (s, 1H, H-8), 7.28 (d,  $^3J_{\text{H}11,\text{H}12} = 10.8$  Hz, 1H, H-12), 6.85 (d,  $^3J_{\text{H}11,\text{H}12} = 10.8$  Hz, 1H, H-11), 6.52 (s, 1H, H-4), 5.89 (ddt,  $^3J_{\text{H}20,\text{H}21} = 17.1$  Hz,  $^3J_{\text{H}20,\text{H}21} = 10.3$  Hz,  $^3J_{\text{H}19,\text{H}20} = 6.7$  Hz, 1H, H-20), 5.19 (dq,  $^2J = 1.5$  Hz,  $^3J_{\text{H}20,\text{H}21} = 17.2$  Hz,  $^4J_{\text{H}20,\text{H}21} = 1.5$  Hz, 1H, H-21a), 5.13 (dq,  $^2J = 1.2$  Hz,  $^3J_{\text{H}20,\text{H}21} = 10.2$  Hz,  $^4J_{\text{H}20,\text{H}21} = 1.2$  Hz, 1H, H-21b), 4.64 (dt,  $^3J_{\text{H}6b,\text{H}7} = 12.2$  Hz,  $^3J_{\text{H}6a,\text{H}7} = 6.4$  Hz,  $^3J_{\text{H}7,\text{NH}} = 6.4$  Hz, 1H, H-7), 4.17 (t,  $^3J_{\text{H}18,\text{H}19} = 7.1$  Hz, 2H, H-18), 3.93 (s, 3H, H-16), 3.89 (s, 3H, H-17), 3.64 (s, 3H, H-15), 2.68 (m, 2H, H-19), 2.51 (dd,  $^2J = 13.1$  Hz,  $^3J_{\text{H}5b,\text{H}6a} = 6.0$  Hz, 1H, H-5b), 2.38 (td,  $^2J = 13.1$  Hz,  $^3J_{\text{H}5a,\text{H}6a} = 13.1$  Hz,  $^3J_{\text{H}5a,\text{H}6b} = 6.0$  Hz, 1H, H-5a), 2.29 (tt,  $^2J = 12.8$ ,  $^3J_{\text{H}5a,\text{H}6a} = 12.8$  Hz,  $^3J_{\text{H}5b,\text{H}6a} = 6.3$  Hz,  $^3J_{\text{H}6a,\text{H}7} = 6.3$  Hz, 1H, H-6a), 1.96 (s, 3H, H-14), 1.90 (m, 1H, H-6b),  $^{13}\text{C}$  NMR (101 MHz,  $\text{CDCl}_3$ , T = 298 K)  $\delta$  179.7 (C-9), 170.1 (C-13), 163.5 (C-10), 153.6 (C-3), 151.8 (C-7a), 151.3 (C-1), 141.8 (C-2), 136.8 (C-12a), 135.4 (C-12), 134.4 (C-4a), 133.5 (C-20), 130.9 (C-8), 125.8 (C-1a), 117.9 (C-21), 113.9 (C-11), 107.5 (C-4), 68.7 (C-18), 61.7 (C-15), 61.5 (C-16), 56.2 (C-17), 52.5 (C-7), 36.7 (C-6), 33.1 (C-19), 30.1 (C-5), 23.0 (C-14).

(S)-*N*-(10-(3-azidopropoxy)-1,2,3-trimethoxy-9-oxo-5,6,7,9-tetrahydrobenzo[*a*]heptalen-7-yl)acetamide (compound **4i**): Yield: 41%; HPLC Rt = 5.512 (HPLC method 1) and 12.705

(HPLC method 2), Anal. Calcd C<sub>24</sub>H<sub>28</sub>N<sub>4</sub>O<sub>6</sub>: C, 61.53; H, 6.02; N, 11.96. Found: C, 61.51; H, 6.03; N, 11.98; HRMS (ESI-TOF) m/z: [M + Na]<sup>+</sup> Calcd for C<sub>24</sub>H<sub>28</sub>N<sub>4</sub>NaO<sub>6</sub><sup>+</sup> 491.1901; Found 491.1899. <sup>1</sup>H NMR (401 MHz, CDCl<sub>3</sub>, T = 298 K) δ 7.44 (s, 1H, H-8), 7.28 (d, <sup>3</sup>J<sub>H11,H12</sub> = 10.7 Hz, 1H, H-12), 6.94 (d, <sup>3</sup>J<sub>H7,NH</sub> = 6.9 Hz, 1H, 7-NH), 6.84 (d, <sup>3</sup>J<sub>H11,H12</sub> = 10.8 Hz, 1H, H-11), 6.53 (s, 1H, H-4), 4.63 (dt, <sup>3</sup>J<sub>H6b,H7</sub> = 12.4 Hz, <sup>3</sup>J<sub>H6a,H7</sub> = 6.5 Hz, <sup>3</sup>J<sub>H7,NH</sub> = 6.5 Hz, 1H, H-7), 4.19 (m, 2H, H-18), 3.94 (s, 3H, H-16), 3.90 (s, 3H, H-17), 3.64 (s, 3H, H-15), 3.60 (m, 2H, H-20), 2.52 (dd, <sup>2</sup>J = 13.4 Hz, <sup>3</sup>J<sub>H5b,H6a</sub> = 6.3 Hz, 1H, H-5b), 2.40 (td, <sup>2</sup>J = 13.1 Hz, <sup>3</sup>J<sub>H5a,H6a</sub> = 13.1 Hz, <sup>3</sup>J<sub>H5a,H6b</sub> = 6.6 Hz, 1H, H-5a), 2.27 (m, 1H, H-6a), 2.19 (m, 2H, H-19), 1.99 (s, 3H, H-14), 1.84 (m, 1H, H-6b), 1.75 (m, 3H, H-21), <sup>13</sup>C NMR (101 MHz, CDCl<sub>3</sub>, T = 298 K) δ 179.6 (C-9), 169.8 (C-13), 163.4 (C-10), 153.6 (C-3), 151.4 (C-7a), 151.3 (C-1), 141.8 (C-2), 136.8 (C-12a), 135.2 (C-12), 134.3 (C-4a), 131.1 (C-8), 125.8 (C-1a), 113.8 (C-11), 107.5 (C-4), 66.0 (C-18), 61.7 (C-15), 61.5 (C-16), 56.3 (C-17), 52.4 (C-7), 48.2 (C-20), 36.9 (C-6), 30.0 (C-5), 28.5 (C-19), 23.2 (C-14).

(S)-N-(1,2,3-trimethoxy-9-oxo-10-((4-vinylbenzyl)oxy)-5,6,7,9-tetrahydrobenzo[*a*]heptalen-7-yl)acetamide (compound **4j**): Yield: 40%; HPLC Rt = 11.105 (HPLC method 1) and 18.491 (HPLC method 2), Anal. Calcd C<sub>30</sub>H<sub>31</sub>NO<sub>6</sub>: C, 71.84; H, 6.23; N, 2.79. Found: C, 71.82; H, 6.24; N, 2.80; HRMS (ESI-TOF) m/z: [M + Na]<sup>+</sup> Calcd for C<sub>30</sub>H<sub>31</sub>NNaO<sub>6</sub><sup>+</sup> 524.2044; Found 524.2043. <sup>1</sup>H NMR (500 MHz, CDCl<sub>3</sub>, T = 298 K) δ 7.60 (d, <sup>3</sup>J<sub>H7,NH</sub> = 6.5 Hz, 1H, 7-NH), 7.54 (s, 1H, H-8), 7.41 (d, <sup>3</sup>J<sub>H20,H21</sub> = 8.6 Hz, 1H, H-21), 7.41 (d, <sup>3</sup>J<sub>H23,H24</sub> = 8.6 Hz, 1H, H-23), 7.38 (d, <sup>3</sup>J<sub>H20,H21</sub> = 8.8 Hz, 1H, H-20), 7.38 (d, <sup>3</sup>J<sub>H23,H24</sub> = 8.8 Hz, 1H, H-24), 7.21 (d, <sup>3</sup>J<sub>H11,H12</sub> = 10.7 Hz, 1H, H-12), 6.88 (d, <sup>3</sup>J<sub>H11,H12</sub> = 10.9 Hz, 1H, H-11), 6.69 (dd, <sup>3</sup>J<sub>H25,H26</sub> = 17.6 Hz, <sup>3</sup>J<sub>H25,H26</sub> = 10.5 Hz, 1H, H-25), 6.50 (s, 1H, H-4), 5.74 (dd, <sup>2</sup>J = 0.9 Hz, <sup>3</sup>J<sub>H25,H26</sub> = 17.6 Hz, 1H, H-26a), 5.36 (d, <sup>2</sup>J = 13.1 Hz, 1H, H-18a), 5.28 (d, <sup>2</sup>J = 12.9 Hz, 1H, H-18b), 5.21 (dd, <sup>2</sup>J = 0.9 Hz, <sup>3</sup>J<sub>H25,H26</sub> = 10.9 Hz, 1H, H-26b), 4.63 (dt, <sup>3</sup>J<sub>H6b,H7</sub> = 11.7 Hz, <sup>3</sup>J<sub>H6a,H7</sub> = 6.1 Hz, <sup>3</sup>J<sub>H7,NH</sub> = 6.1 Hz, 1H, H-7), 3.91 (s, 3H, H-16), 3.88 (s, 3H, H-17), 3.61 (s, 3H, H-15), 2.52 (dd, <sup>2</sup>J = 12.7 Hz, <sup>3</sup>J<sub>H5b,H6a</sub> = 5.2 Hz, 1H, H-5b), 2.36 (td, <sup>2</sup>J = 12.9 Hz, <sup>3</sup>J<sub>H5a,H6a</sub> = 12.9 Hz, <sup>3</sup>J<sub>H5a,H6b</sub> = 6.2 Hz, 1H, H-5a), 2.30 (m, 1H, H-6a), 1.98 (s, 3H, H-14), 1.89 (m, 1H, H-6b), <sup>13</sup>C NMR (101 MHz, CDCl<sub>3</sub>, T = 298 K) δ 179.8 (C-9), 170.1 (C-13), 163.1 (C-10), 153.6 (C-3), 152.1 (C-7a), 151.3 (C-1), 141.7 (C-2), 137.8 (C-22), 137.2 (C-12a), 136.4 (C-25), 135.3 (C-19), 134.9 (C-12), 134.3 (C-4a), 131.1 (C-8), 127.4 (C-21), 127.4 (C-23), 126.7 (C-20), 126.7 (C-24), 125.7 (C-1a), 115.1 (C-11), 114.5 (C-26), 107.4 (C-4), 70.9 (C-18), 61.7 (C-15), 61.5 (C-16), 52.6 (C-7), 56.2 (C-17), 36.6 (C-6), 30.0 (C-5), 23.0 (C-14).

(S)-N-(9-((1-benzyl-1*H*-1,2,3-triazol-4-yl)methoxy)-1,2,3-trimethoxy-10-oxo-5,6,7,10-tetrahydrobenzo[*a*]heptalen-7-yl)acetamide (compound **5a**) Derivative **3f** 70 mg (0.17 mmol) was dissolved in a 6 mL mixture of THF/MeOH (3:1) and benzyl azide 22 mg (0.17 mmol) was added. Then, to each mixture, 6.5 mg (0.05 mmol) of CH<sub>3</sub>COOCu(I) and 45 mg (0.25 mmol) of ascorbic acid was added. The solution was stirred at room temperature for a three hours and after this time, dichloromethane was added and extracted twice with 25 mL of ammonium hydroxide, twice with 25 mL of water and finally twice with 25 mL of brine. The organic layer was evaporated and the synthesized derivative **5a** was purified by column chromatography with silica gel with dichloromethane/acetone (2:1) as an eluent. The product was obtained as a yellow powder. (24 mg, 27%) mp 121-125 °C. HPLC R<sub>t</sub> = 9.680 min. Anal.

Calcd for C<sub>31</sub>H<sub>32</sub>N<sub>4</sub>O<sub>6</sub>: C, 66.89; H, 5.79; N, 10.07. Found: C, 66.91; H, 5.78; N, 10.05; HRMS (ESI-TOF) m/z: [M + H]<sup>+</sup> Calcd 556.2322; Found 556.2320. FT-IR (KBr):  $\nu(\text{N-H})_{\text{amide}}$  - 3287 cm<sup>-1</sup>;  $\nu(\text{=CH})$  - 3063 cm<sup>-1</sup>;  $\nu(\text{C-H})$  - 2934 cm<sup>-1</sup>; 2854 cm<sup>-1</sup>;  $\nu(\text{C=O})_{\text{amide}}$  - 1662 cm<sup>-1</sup>;  $\nu(\text{C=C})_{\text{ar}}$  - 1611 cm<sup>-1</sup>;  $\delta(\text{N-H})_{\text{amide}}$  - 1559 cm<sup>-1</sup>;  $\nu(\text{C=C})$  - 1489 cm<sup>-1</sup>;  $\nu(\text{C-O})_{\text{as}}$  - 1253 cm<sup>-1</sup>;  $\nu(\text{C-O})_{\text{sym}}$  - 1166, 1096 cm<sup>-1</sup>. <sup>1</sup>H NMR (500 MHz, CDCl<sub>3</sub>, 25°C)  $\delta$  7.72 (s, 1H, H-20), 7.72 (s, 1H, H-8), 7.40 (s, 1H, H-12), 7.40 – 7.38 (m, 2H, H-24,26), 7.38 – 7.37 (m, 2H, H-23,27), 7.27 (s, 1H, H-25), 7.12 (d, <sup>3</sup>J<sub>H11,H12</sub> = 12.8 Hz, 1H, H-11), 6.92 (d, <sup>3</sup>J<sub>H7,NH7</sub> = 8.0 Hz, 1H, NH-7), 6.54 (s, 1H, H-4), 5.51 (d, <sup>2</sup>J = 1.8 Hz, 2H, H-21), 5.47 (d, <sup>2</sup>J = 13.9 Hz, 1H, H-18), 5.40 (d, <sup>2</sup>J = 13.8 Hz, 1H, H-18), 4.69 (dt, <sup>3</sup>J<sub>H6b,H7</sub> = 13.5 Hz, <sup>3</sup>J<sub>H6a,H7</sub> = 6.9 Hz, <sup>3</sup>J<sub>H7,NH7</sub> = 6.9 Hz, 1H, H-7), 3.92 (s, 3H, H-16), 3.89 (s, 3H, H-17), 3.66 (s, 3H, H-15), 2.43 (dd, <sup>2</sup>J = 13.0 Hz, <sup>3</sup>J<sub>H5b,H6a</sub> = 6.1 Hz, 1H, H-5b), 2.31 (td, <sup>2</sup>J = 12.3 Hz, <sup>3</sup>J<sub>H5a,H6a</sub> = 12.3 Hz, <sup>3</sup>J<sub>H5a,H6b</sub> = 6.2 Hz, 1H, H-5a), 2.22 (tt, <sup>2</sup>J = 12.9 Hz, <sup>3</sup>J<sub>H5a,H6a</sub> = 12.9 Hz, <sup>3</sup>J<sub>H5b,H6a</sub> = 7.2 Hz, <sup>3</sup>J<sub>H6a,H7</sub> = 7.2 Hz, 1H, H-6a), 2.12 (s, 3H, H-14), 1.85 – 1.83 (m, 1H, H-6b). <sup>13</sup>C NMR (126 MHz, CDCl<sub>3</sub>, 25°C)  $\delta$  179.6 (C-10), 170.2 (C-13), 162.2 (C-9), 153.8 (C-3), 151.1 (C-1), 143.9 (C-7a), 143.6 (C-19), 141.7 (C-2), 141.2 (C-12), 135.5 (C-12a), 135.0 (C-4a), 134.7 (C-11), 134.0 (C-22), 129.4\* (C-23,27), 129.3 (C-25), 128.3\* (C-24,26), 125.8 (C-1a), 124.8 (C-20), 113.0 (C-8), 107.7 (C-4), 62.3 (C-18), 61.6 (C-15), 61.5 (C-16), 56.2 (C-17), 54.7 (C-21), 52.3 (C-7), 39.1 (C-6), 29.8 (C-5), 23.4 (C-14). (\*-overlapped)

(S)-N-(9-((1-(4-cyanobenzyl)-1H-1,2,3-triazol-4-yl)methoxy)-1,2,3-trimethoxy-10-oxo-5,6,7,10-tetrahydrobenzo[a]heptalen-7-yl)acetamide (compound **5b**) Derivative **3f** 70 mg (0.17 mmol) was dissolved in a 6 mL mixture of THF/MeOH (3:1) and 4-(Azidomethyl)benzotrile 0.331 mL (0.17 mmol) was added. Then, to each mixture, 6.5 mg (0.05 mmol) of CH<sub>3</sub>COOCu(I) and 45 mg (0.25 mmol) of ascorbic acid was added. The solution was stirred at room temperature for a three hours and after this time, dichloromethane was added and extracted twice with 25 mL of ammonium hydroxide, twice with 25 mL of water and finally twice with 25 mL of brine. The organic layer was evaporated and the synthesized derivative **5b** was purified by column chromatography with silica gel with dichloromethane/acetone (2:1) as an eluent. The product was obtained as a yellow powder. (23 mg, 24%) mp 124-128 °C. HPLC R<sub>t</sub> = 8.467 min. Anal. Calcd for C<sub>32</sub>H<sub>31</sub>N<sub>5</sub>O<sub>6</sub>: C, 66.08; H, 5.37; N, 12.04. Found: C, 66.06; H, 5.38; N, 12.03; HRMS (ESI-TOF) m/z: [M + H]<sup>+</sup> Calcd 581.2274; Found 581.2272. FT-IR (KBr):  $\nu(\text{N-H})_{\text{amide}}$  - 3287 cm<sup>-1</sup>;  $\nu(\text{=CH})$  - 3058 cm<sup>-1</sup>;  $\nu(\text{C-H})$  - 2934 cm<sup>-1</sup>, 2853 cm<sup>-1</sup>;  $\nu(\text{C}\equiv\text{N})$  - 2229 cm<sup>-1</sup>;  $\nu(\text{C=O})_{\text{amide}}$  - 1661 cm<sup>-1</sup>;  $\nu(\text{C=C})_{\text{ar}}$  - 1611 cm<sup>-1</sup>;  $\delta(\text{N-H})_{\text{amide}}$  - 1560 cm<sup>-1</sup>;  $\nu(\text{C=C})$  - 1489 cm<sup>-1</sup>;  $\nu(\text{C-O})_{\text{as}}$  - 1253 cm<sup>-1</sup>;  $\nu(\text{C-O})_{\text{s}}$  - 1166, 1096 cm<sup>-1</sup>. <sup>1</sup>H NMR (500 MHz, CDCl<sub>3</sub>, 25°C)  $\delta$  7.83 (s, 1H, H-20), 7.66 (d, <sup>3</sup>J<sub>H24,26,H23,27</sub> = 8.0 Hz, 2H, H-24,26), 7.63 (s, 1H, H-8), 7.39 (d, <sup>3</sup>J<sub>H11,H12</sub> = 12.8 Hz, 1H, H-12), 7.34 (d, <sup>3</sup>J<sub>H24,26,H23,27</sub> = 8.0 Hz, 2H, H-23,27), 7.12 (d, <sup>3</sup>J<sub>H11,H12</sub> = 12.8 Hz, 1H, H-11), 6.81 (d, <sup>3</sup>J<sub>H7,NH7</sub> = 7.7 Hz, 1H, NH-7), 6.54 (s, 1H, H-4), 5.59 (d, <sup>2</sup>J = 2.3 Hz, 2H, H-21), 5.47 (d, <sup>2</sup>J = 13.7 Hz, 1H, H-18), 5.43 (d, <sup>2</sup>J = 13.7 Hz, 1H, H-18), 4.69 (dt, <sup>3</sup>J<sub>H6b,H7</sub> = 13.5 Hz, <sup>3</sup>J<sub>H6a,H7</sub> = 6.9 Hz, <sup>3</sup>J<sub>H7,NH7</sub> = 6.9 Hz, 1H, H-7), 3.92 (s, 3H, H-16), 3.89 (s, 3H, H-17), 3.66 (s, 3H, H-15), 2.45 (dd, <sup>2</sup>J = 12.9 Hz, <sup>3</sup>J<sub>H5b,H6a</sub> = 6.0 Hz, 1H, H-5b), 2.31 (td, <sup>2</sup>J = 11.9 Hz, <sup>3</sup>J<sub>H5a,H6a</sub> = 11.9 Hz, <sup>3</sup>J<sub>H5a,H6b</sub> = 6.1 Hz, 1H, H-5a), 2.23 (tt, <sup>2</sup>J = 12.8 Hz, <sup>3</sup>J<sub>H5a,H6a</sub> = 12.8 Hz, <sup>3</sup>J<sub>H5b,H6a</sub> = 7.0 Hz, <sup>3</sup>J<sub>H6a,H7</sub> = 7.0 Hz, 1H, H-6a), 2.09 (s, 3H, H-14), 1.88 – 1.82 (m, 1H, H-6b). <sup>13</sup>C NMR (126 MHz, CDCl<sub>3</sub>, 25°C)  $\delta$  179.6 (C-10), 170.1 (C-13), 162.1 (C-9), 153.9 (C-3), 151.0 (C-1),

144.0 (C-7a), 143.8 (C-19), 141.8 (C-2), 141.4 (C-12), 139.3 (C-22), 135.7 (C-12a), 134.9 (C-4a), 134.7 (C-11), 133.1\* (C-24,26), 128.7\* (C-23,27), 125.7 (C-1a), 125.0 (C-20), 118.1 (C-28), 113.2 (C-25), 113.1 (C-8), 107.7 (C-4), 62.2 (C-18), 61.6 (C-15), 61.5 (C-16), 56.2 (C-17), 53.9 (C-21), 52.4 (C-7), 39.1 (C-6), 29.8 (C-5), 23.3 (C-14). (\*-overlapped)

(*S*)-*N*-(1,2,3-trimethoxy-9-((1-(4-nitrobenzyl)-1*H*-1,2,3-triazol-4-yl)methoxy)-10-oxo-5,6,7,10-tetrahydrobenzo[*a*]heptalen-7-yl)acetamide (compound **5c**) Derivative **3f** 70 mg (0.17 mmol) was dissolved in a 6 mL mixture of THF/MeOH (3:1) and 1-(azidomethyl)-4-nitrobenzene 30 mg (0.17 mmol) was added. Then, to each mixture, 6.5 mg (0.05 mmol) of CH<sub>3</sub>COOCu(I) and 45 mg (0.25 mmol) of ascorbic acid was added. The solution was stirred at room temperature for a three hours and after this time, dichloromethane was added and extracted twice with 25 mL of ammonium hydroxide, twice with 25 mL of water and finally twice with 25 mL of brine. The organic layer was evaporated and the synthesized derivative **5c** was purified by column chromatography with silica gel with dichloromethane/acetone (2:1) as an eluent. The product was obtained as a yellow powder. (19 mg, 19%) mp 123-126 °C. HPLC R<sub>t</sub> = 9.547 min. Anal. Calcd for C<sub>31</sub>H<sub>31</sub>N<sub>5</sub>O<sub>8</sub>: C, 61.89; H, 5.19; N, 11.64. Found: C, 61.88; H, 5.21; N, 11.62; HRMS (ESI-TOF) m/z: [M + H]<sup>+</sup> Calcd 601.2173; Found 601.2172. FT-IR (KBr): ν(N-H)<sub>amide</sub> - 3284 cm<sup>-1</sup>; ν(=CH) - 3077 cm<sup>-1</sup>; ν(C-H) - 2933 cm<sup>-1</sup>, 2850 cm<sup>-1</sup>; ν(C=O)<sub>amide</sub> - 1661 cm<sup>-1</sup>; ν(C=C)<sub>ar</sub> - 1610 cm<sup>-1</sup>; δ(N-H)<sub>amide</sub> - 1560 cm<sup>-1</sup>; ν(NO<sub>2</sub>)<sub>as</sub> - 1522 cm<sup>-1</sup>; ν(C=C) - 1489 cm<sup>-1</sup>; ν(NO<sub>2</sub>)<sub>s</sub> - 1348 cm<sup>-1</sup>; ν(C-O)<sub>as</sub> - 1253 cm<sup>-1</sup>; ν(C-O)<sub>s</sub> - 1166, 1095 cm<sup>-1</sup>. <sup>1</sup>H NMR (500 MHz, CDCl<sub>3</sub>, 25°C) δ 8.22 (d, <sup>3</sup>J<sub>H24,26,H23,27</sub> = 8.2 Hz, 2H, H-24,26), 7.87 (s, 1H, H-20), 7.64 (s, 1H, H-8), 7.41 (d, <sup>3</sup>J<sub>H24,26,H23,27</sub> = 8.5 Hz, 2H, H-23,27), 7.39 (d, <sup>3</sup>J<sub>H11,H12</sub> = 12.3 Hz, 1H, H-12), 7.13 (d, <sup>3</sup>J<sub>H11,H12</sub> = 12.8 Hz, 1H, H-11), 6.80 (d, <sup>3</sup>J<sub>H7,NH7</sub> = 7.6 Hz, 1H, NH-7), 6.54 (s, 1H, H-4), 5.64 (s, 2H, H-21), 5.47 (d, <sup>2</sup>J = 14.2 Hz, 1H, H-18), 5.43 (d, <sup>2</sup>J = 13.8 Hz, 1H, H-18), 4.69 (dt, <sup>3</sup>J<sub>H6b,H7</sub> = 13.3 Hz, <sup>3</sup>J<sub>H6a,H7</sub> = 6.9 Hz, <sup>3</sup>J<sub>H7,NH7</sub> = 6.9 Hz, 1H, H-7), 3.92 (s, 3H, H-16), 3.89 (s, 3H, H-17), 3.66 (s, 3H, H-15), 2.45 (dd, <sup>2</sup>J = 12.9 Hz, <sup>3</sup>J<sub>H5b,H6a</sub> = 6.0 Hz, 1H, H-5b), 2.31 (dq, <sup>2</sup>J = 12.0 Hz, <sup>3</sup>J<sub>H5a,H6a</sub> = 12.0 Hz, <sup>3</sup>J<sub>H5a,H6b</sub> = 6.1 Hz, 1H, H-5a), 2.23 (tt, <sup>2</sup>J = 12.8 Hz, <sup>3</sup>J<sub>H5a,H6a</sub> = 12.8 Hz, <sup>3</sup>J<sub>H5b,H6a</sub> = 6.9 Hz, <sup>3</sup>J<sub>H6a,H7</sub> = 6.9 Hz, 1H, H-6a), 2.10 (s, 3H, H-14), 1.88 – 1.77 (m, 1H, H-6b). <sup>13</sup>C NMR (126 MHz, CDCl<sub>3</sub>, 25°C) δ 179.6 (C-10), 170.1 (C-13), 162.1 (C-9), 153.9 (C-3), 151.0 (C-1), 148.3 (C-25), 144.1 (C-7a), 143.9 (C-19), 141.8 (C-2), 141.4 (C-12), 141.1 (C-22), 135.7 (C-12a), 134.9 (C-4a), 134.7 (C-11), 128.9\* (C-23,27), 125.7 (C-1a), 125.0 (C-20), 124.5\* (C-24,26), 113.1 (C-8), 107.7 (C-4), 62.2 (C-18), 61.6 (C-15), 61.5 (C-16), 56.2 (C-17), 53.5 (C-21), 52.5 (C-7), 39.1 (C-6), 29.8 (C-5), 23.4 (C-14). (\*-overlapped)

(2*R*,3*S*,4*R*,5*R*,6*R*)-5-acetamido-6-(4-(((*S*)-7-acetamido-1,2,3-trimethoxy-10-oxo-5,6,7,10-tetrahydrobenzo[*a*]heptalen-9-yl)oxy)methyl)-1*H*-1,2,3-triazol-1-yl)-2-(acetoxymethyl)tetrahydro-2*H*-pyran-3,4-diyl diacetate (compound **5d**) Derivative **3f** 70 mg (0.17 mmol) was dissolved in a 6 mL mixture of THF/MeOH (3:1) and 2-acetamido-2-deoxy-β-D-glucopyranosyl azide 3,4,6-triacetate 61.5 mg (0.17 mmol) was added. Then, to each mixture, 6.5 mg (0.05 mmol) of CH<sub>3</sub>COOCu(I) and 45 mg (0.25 mmol) of ascorbic acid was added. The solution was stirred at room temperature for a three hours and after this time, the

mixture was evaporated. Synthesized derivative **5d** was purified by column chromatography with silica gel with dichloromethane/acetone (2:1) as an eluent. The product was obtained as a yellow powder. (34 mg, 26%) mp 137-140 °C. Anal. Calcd for C<sub>38</sub>H<sub>45</sub>N<sub>5</sub>O<sub>14</sub>: C, 57.35; H, 5.70; N, 8.80. Found: C, 57.33; H, 5.69; N, 8.81; HRMS (ESI-TOF) m/z: [M + H]<sup>+</sup> Calcd 795.2963; Found 795.2961. FT-IR (KBr):  $\nu(\text{N-H})_{\text{amide}}$  - 3276 cm<sup>-1</sup>;  $\nu(=\text{CH})$  - 3061 cm<sup>-1</sup>;  $\nu(\text{C-H})$  - 2932 cm<sup>-1</sup>, 2855 cm<sup>-1</sup>,  $\nu(\text{C=O})_{\text{ester}}$  - 1750 cm<sup>-1</sup>;  $\nu(\text{C=O})_{\text{amide}}$  - 1663 cm<sup>-1</sup>;  $\nu(\text{C=C})_{\text{ar.}}$  - 1612 cm<sup>-1</sup>;  $\delta(\text{N-H})_{\text{amide}}$  - 1560 cm<sup>-1</sup>;  $\nu(\text{C=C})$  - 1490 cm<sup>-1</sup>;  $\nu(\text{C-O})_{\text{as}}$  - 1237 cm<sup>-1</sup>;  $\nu(\text{C-O})_{\text{s}}$  - 1167, 1096 cm<sup>-1</sup>. <sup>1</sup>H NMR (500 MHz, CDCl<sub>3</sub>, 25°C)  $\delta$  8.17 (s, 1H, H-20), 7.58 (s, 1H, H-8), 7.42 (d, <sup>3</sup>J<sub>H11,H12</sub> = 12.6 Hz, 1H, H-12), 7.16 (d, <sup>3</sup>J<sub>H11,H12</sub> = 12.8 Hz, 1H, H-11), 6.88 (bs, 1H, H-21), 6.54 (s, 1H, H-4), 6.15 – 6.08 (m, 2H, NH-7,22), 5.51 (t, <sup>3</sup>J<sub>H22,H23</sub> = 9.9 Hz, 1H, H-23), 5.46 (bs, 2H, H-18), 5.26 (t, <sup>3</sup>J<sub>H22,H23</sub> = 9.9 Hz, 1H, H-23), 4.65 (bs, 1H, H-7), 4.50 (d, <sup>3</sup>J<sub>H24,H25</sub> = 9.2 Hz, 1H, H-25), 4.29 (dd, <sup>2</sup>J = 12.6 Hz, <sup>3</sup>J<sub>H24,H32</sub> = 4.4 Hz, 1H, H-32), 4.16 (d, <sup>2</sup>J = 12.4 Hz, 1H, H-32), 4.04 (d, <sup>3</sup>J<sub>H24,H25</sub> = 9.7 Hz, 1H, H-24), 3.91 (s, 3H, H-16), 3.89 (s, 3H, H-17), 3.67 (s, 3H, H-15), 2.45 (d, <sup>3</sup>J<sub>H5b,H6a</sub> = 7.6 Hz, 1H, H-5b), 2.30 – 2.26 (m, 2H, H-5a,6a), 2.11 (s, 3H, H-14), 2.07 (s, 3H, H-29), 2.05 (s, 3H, H-31), 2.04 (s, 3H, H-34), 1.98 (bs, 1H, H-6b), 1.65 (s, 3H, H-27). <sup>13</sup>C NMR (126 MHz, CDCl<sub>3</sub>, 25°C)  $\delta$  179.6 (C-10), 170.8\* (C-28,30,33), 170.5 (C-13), 169.5 (C-26), 162.2 (C-9), 153.9 (C-3), 150.9 (C-1), 144.3 (C-7a), 144.3 (C-19), 141.7 (C-2), 141.7 (C-12), 136.0 (C-12a), 135.1 (C-4a), 135.1 (C-11), 125.7\* (C-1a,20), 113.8 (C-8), 107.6 (C-4), 86.2 (C-21), 75.1 (C-24), 72.3 (C-23), 68.0 (C-25), 62.5 (C-18), 61.8 (C-32), 61.6 (C-15), 61.5 (C-16), 56.3 (C-17), 54.1 (C-22), 52.6 (C-7), 38.8 (C-6), 30.1 (C-5), 23.3 (C-14), 22.9 (C-27), 20.9 (C-34), 20.8 (C-31), 20.7 (C-29). (\*-overlapped)

*N*-((*S*)-9-((1-((2*S*,3*R*,5*R*)-2-(hydroxymethyl)-5-(5-methyl-2,4-dioxo-3,4-dihydropyrimidin-1(2*H*)-yl)tetrahydrofuran-3-yl)-1*H*-1,2,3-triazol-4-yl)methoxy)-1,2,3-trimethoxy-10-oxo-5,6,7,10-tetrahydrobenzo[*a*]heptalen-7-yl)acetamide (compound **5e**) Derivative **3f** 70 mg (0.17 mmol) was dissolved in a 6 mL mixture of THF/MeOH (3:1) and AZT 31.5 mg (0.17 mmol) was added. Then, to each mixture, 6.5 mg (0.05 mmol) of CH<sub>3</sub>COOCu(I) and 45 mg (0.25 mmol) of ascorbic acid was added. The solution was stirred at 60°C for a three hours and after this time, the mixture was evaporated. Synthesized derivative **5e** was purified by column chromatography with silica gel with dichloromethane/methanol (25:1) as an eluent. The product was obtained as a yellow powder. (31 mg, 27%) mp 201-203 °C. HPLC R<sub>t</sub> = 4.652 min. Anal. Calcd for C<sub>34</sub>H<sub>38</sub>N<sub>6</sub>O<sub>10</sub>: C, 59.12; H, 5.55; N, 12.17. Found: C, 59.13; H, 5.56; N, 12.18; HRMS (ESI-TOF) m/z: [M + H]<sup>+</sup> Calcd 690.2649; Found 690.2644. FT-IR (KBr):  $\nu(\text{N-H})^*_{\text{amide, substituent}}$ ,  $\nu(\text{O-H})^*$  - 3287 cm<sup>-1</sup>;  $\nu(=\text{CH})$  - 3064 cm<sup>-1</sup>;  $\nu(\text{C-H})$  - 2934 cm<sup>-1</sup>;  $\nu(\text{C=O})^*_{\text{amide, substituent}}$  - 1692 cm<sup>-1</sup>;  $\nu(\text{C=C})_{\text{ar.}}$  - 1610 cm<sup>-1</sup>;  $\delta(\text{N-H})_{\text{amide}}$  - 1558 cm<sup>-1</sup>;  $\nu(\text{C=C})$  - 1489 cm<sup>-1</sup>;  $\nu(\text{C=C})_{\text{substituent}}$  - 1457 cm<sup>-1</sup>,  $\nu(\text{C-O})_{\text{as}}$  - 1267 cm<sup>-1</sup>;  $\nu(\text{C-O})_{\text{s}}$  - 1140, 1096 cm<sup>-1</sup>. <sup>1</sup>H NMR (500 MHz, CDCl<sub>3</sub>, 25°C)  $\delta$  10.07 (vbs, 1H, NH-28), 9.53 (vbs, 1H, OH-25), 8.09 (bs, 1H, H-20), 7.72 – 7.49 (m, 2H, H-8,26), 7.42 (d, <sup>3</sup>J<sub>H11,H12</sub> = 12.2 Hz, 1H, H-12), 7.14 (d, <sup>3</sup>J<sub>H11,H12</sub> = 12.3 Hz, 1H, H-11), 6.55 (s, 1H, H-4), 5.44 (bs, 3H, NH-7, H-18), 5.38 – 5.08 (m, 1H, H-23), 4.65 (bs, 1H, H-21), 4.48 (bs, 1H, H-7), 3.90 (s, 3H, H-16), 3.88 (s, 5H, H-17,25), 3.83 – 3.73 (m, 1H, H-22), 3.64 (bs, 2H, H-24), 3.63 (s, 3H, H-15), 2.45 (bs, 1H, H-5b), 2.33 – 2.21 (m, 2H, H-5a,6a), 2.16 (d, <sup>4</sup>J<sub>H14,NH7</sub> = 3.3 Hz, 3H, H-14), 2.10 – 2.04 (m, 1H, H-6b), 1.97 – 1.86 (m, 3H, H-30). <sup>13</sup>C NMR (126 MHz, CDCl<sub>3</sub>, 25°C)  $\delta$  179.6 (C-10), 170.5 (C-13), 164.0 (C-28), 162.3 (C-9), 153.9 (C-3), 151.0 (C-1), 150.5 (C-29), 144.7 (C-7a), 144.7 (C-



19), 141.6 (C-2), 141.6 (C-12), 136.0 (C-12a), 135.7 (C-26), 135.1 (C-4a), 135.1 (C-11), 125.7 (C-1a), 125.6 (C-20), 113.5 (C-8), 111.1 (C-27), 107.7 (C-4), 85.8 (C-23), 83.6 (C-22), 69.7 (C-21), 66.7 (C-25), 62.4 (C-18), 61.6 (C-15), 61.5 (C-16), 56.2 (C-17), 52.6 (C-7), 38.8 (C-6), 31.9 (C-24), 29.8 (C-5), 23.3 (C-14), 12.6 (C-30). (\*-overlapped)

(4*E*,6*Z*,8*S*,9*S*,10*E*,12*S*,13*R*,14*S*,16*R*)-19-((2-(4-(((*S*)-7-acetamido-1,2,3-trimethoxy-10-oxo-5,6,7,10-tetrahydrobenzo[*a*]heptalen-9-yl)oxy)methyl)-1*H*-1,2,3-triazol-1-yl)ethyl)amino)-13-hydroxy-8,14-dimethoxy-4,10,12,16-tetramethyl-3,20,22-trioxo-2-azabicyclo[16.3.1]docosa-1(21),4,6,10,18-pentaen-9-yl carbamate (compound **5f**) Derivative **3f** 70 mg (0.17 mmol) was in a 4 mL mixture of TBA/H<sub>2</sub>O (1:1) and **9** 70 mg (0.11 mmol) was added. Then, to each mixture, 2 mg (0.02 mmol) of CH<sub>3</sub>COOCu(I) and 10 mg (0.06 mmol) of ascorbic acid was added. The solution was stirred at room temperature for a 72 hours and after this time, the mixture was evaporated. Synthesized derivative **5f** was purified by column chromatography with silica gel with dichloromethane/methanol (25:1) as an eluent. The product was obtained as a violet powder. (41 mg, 25%) mp 179-181 °C. HPLC R<sub>t</sub> = 4.461 min. Anal. Calcd for C<sub>54</sub>H<sub>67</sub>N<sub>7</sub>O<sub>14</sub>: C, 62.47; H, 6.51; N, 9.44. Found: C, 62.46; H, 6.50; N, 9.43; HRMS (ESI-TOF) m/z: [M + H]<sup>+</sup> Calcd 1037.4746; Found 1037.4744. FT-IR (KBr): ν<sub>s</sub>(N-H)<sub>carbamate</sub> - 3449 cm<sup>-1</sup>; ν<sub>s</sub>(N-H)<sub>lactam</sub> - 3335 cm<sup>-1</sup>; ν(N-H)\*<sub>amide</sub>, ν(O-H) - 3205 cm<sup>-1</sup>; ν(=CH) - 3064 cm<sup>-1</sup>; ν(C-H) - 2933 cm<sup>-1</sup>; ν(C=O)<sub>carbamate</sub> - 1721 cm<sup>-1</sup>; ν(C=O)\*<sub>lactam, amide</sub> - 1685 cm<sup>-1</sup>; ν(C=O)<sub>quinone</sub> - 1650 cm<sup>-1</sup>; ν(C=C) - 1610 cm<sup>-1</sup>; δ(N-H)\*<sub>lactam, amide</sub> - 1563 cm<sup>-1</sup>; δ(N-H)<sub>carbamate</sub> - 1489 cm<sup>-1</sup>; ν(C-N)<sub>carbamate</sub> - 1322 cm<sup>-1</sup>; ν(C-O)<sub>as</sub> - 1252 cm<sup>-1</sup>; ν(C-O-C)<sub>carbamate</sub> - 1193 cm<sup>-1</sup>; ν(C-O)<sub>s</sub> - 1140, 1096 cm<sup>-1</sup>, ν(C-O)<sub>methoxy</sub> - 1053 cm<sup>-1</sup>. <sup>1</sup>H NMR (500 MHz, CDCl<sub>3</sub>, 25°C) δ 9.04 (s, 1H, 1'-NH), 8.04 (s, 1H, H-20), 7.62 (s, 1H, H-8), 7.39 (d, <sup>3</sup>J<sub>H11,H12</sub> = 12.8 Hz, 1H, H-12), 7.29 (d, <sup>3</sup>J<sub>H7,NH7</sub> = 7.6 Hz, 1H, NH-7), 7.15 (s, 1H, H-19'), 7.10 (d, <sup>3</sup>J<sub>H-11,H-12</sub> = 12.7 Hz, 1H, H-11), 6.91 (d, <sup>3</sup>J<sub>H3',H4'</sub> = 11.6 Hz, 1H, H-3'), 6.59 – 6.55 (m, 1H, NH-17'), 6.55 – 6.50 (m, 2H, H-4',4), 5.85 (t, <sup>3</sup>J<sub>H4',H5'</sub> = 10.3 Hz, 1H, H-5'), 5.82 – 5.78 (m, 1H, H-9'), 5.41 (s, 2H, H-18), 5.12 (s, 1H, H-7'), 5.09 (s, 2H, NH<sub>2</sub>-24'), 4.69 – 4.61 (m, 3H, H-7,29'), 4.30 – 4.25 (m, 1H, H-6'), 4.11 – 4.01 (m, 2H, 30'-H), 3.90 (s, 3H, H-16), 3.88 (s, 3H, H-17), 3.65 (s, 3H, H-15), 3.58 – 3.52 (m, 1H, H-11'), 3.41 – 3.36 (m, 1H, H-12'), 3.31 (s, 3H, H-27'), 3.24 (s, 3H, H-23'), 2.75 – 2.68 (m, 1H, H-10'), 2.64 (d, <sup>2</sup>J = 13.6 Hz, 1H, H-15'), 2.47 – 2.40 (m, 1H, H-5b), 2.34 – 2.18 (m, 4H, H-5a,6a,15', OH-11'), 2.08 (s, 3H, H-14), 1.98 (s, 3H, H-22'), 1.96 – 1.88 (m, 1H, H-6b), 1.78 – 1.75 (m, 3H, H-25'), 1.75 – 1.71 (m, 2H, H-13'), 1.69 (s, 1H, H-14'), 0.95 (d, <sup>3</sup>J<sub>H10,H26</sub> = 6.9 Hz, 3H, H-26'), 0.90 (d, <sup>3</sup>J<sub>H14,H28</sub> = 6.4 Hz, 3H, H-28'). <sup>13</sup>C NMR (126 MHz, CDCl<sub>3</sub>, 25°C) δ 184.1 (C-18'), 180.9 (C-21'), 179.5 (C-10), 170.4 (C-13), 168.3 (C-1'), 162.2 (C-9), 156.4 (C-24'), 153.8 (C-3), 150.9 (C-1), 145.0 (C-17'), 144.5 (C-7a), 143.5 (C-19'), 141.6\* (C-2,12), 140.7 (C-20'), 136.3 (C-5'), 135.8 (C-12a), 135.1 (C-4a), 134.9 (C-2'), 134.4 (C-11), 133.5 (C-9'), 133.3 (C-8'), 127.2 (C-3'), 126.5 (C-4'), 125.7 (C-1a), 125.5 (C-20), 113.3 (C-8), 110.8 (C-16'), 109.1 (C-19'), 107.7 (C-4), 81.7 (C-7'), 81.3 (C-6'), 81.3 (C-12'), 72.6 (C-11'), 62.3 (C-18), 61.6 (C-15), 61.5 (C-16), 57.2 (C-23'), 56.8 (C-27'), 56.2 (C-17), 52.6 (C-7), 49.8 (C-29'), 45.2 (C-30'), 38.8 (C-6), 35.0 (C-13'), 34.2 (C-15'), 32.4 (C-10'), 30.1 (C-5), 28.8 (C-14'), 23.2 (C-28'), 23.0 (C-14), 12.9 (C-25'), 12.6 (C-22'), 12.6 (C-26'). (\*-overlapped)

(*S*)-*N*-(10-((1-benzyl-1*H*-1,2,3-triazol-4-yl)methoxy)-1,2,3-trimethoxy-9-oxo-5,6,7,9-tetrahydrobenzo[*a*]heptalen-7-yl)acetamide (compound **6a**) Derivative **4f** 70 mg (0.17 mmol) was dissolved in a 6 mL mixture of THF/MeOH (3:1) and benzyl azide 22 mg (0.17 mmol) was added. Then, to each mixture, 6.5 mg (0.05 mmol) of CH<sub>3</sub>COOCu(I) and 45 mg (0.25 mmol) of ascorbic acid was added. The solution was stirred at room temperature for a three hours and after this time, dichloromethane was added and extracted twice with 25 mL of ammonium hydroxide, twice with 25mL of water and finally twice with 25 mL of brine. The organic layer was evaporated and the synthesized derivative **6a** was purified by column chromatography with silica gel with dichloromethane/acetone (2:1) as an eluent. The product was obtained as a yellow powder. (23 mg, 25%) mp 116-119 °C. HPLC R<sub>t</sub>= 9.187min. Anal. Calcd for C<sub>31</sub>H<sub>32</sub>N<sub>4</sub>O<sub>6</sub>: C, 66.89; H, 5.79; N, 10.07. Found: C, 66.90; H, 5.78; N, 10.06; HRMS (ESI-TOF) m/z: [M + H]<sup>+</sup> Calcd 556.2322; Found 556.2321. FT-IR (KBr): ν(N-H)<sub>amide</sub> - 3281 cm<sup>-1</sup>; ν(=CH) - 3061 cm<sup>-1</sup>; ν(C-H) - 2933 cm<sup>-1</sup>, 2853 cm<sup>-1</sup>; ν(C=O)<sub>amide</sub> - 1661 cm<sup>-1</sup>; ν(C=C)<sub>ar.</sub> - 1614 cm<sup>-1</sup>; δ(N-H)<sub>amide</sub> - 1558 cm<sup>-1</sup>; ν(C=C) - 1487 cm<sup>-1</sup>; ν(C-O)<sub>as.</sub> - 1237 cm<sup>-1</sup>; ν(C-O)<sub>sym</sub> - 1171, 1094 cm<sup>-1</sup>. <sup>1</sup>H NMR (500 MHz, CDCl<sub>3</sub>, 25°C) δ 7.64 (s, 1H, H-20), 7.43 (s, 1H, H-8), 7.36 (s, 1H, H-12), 7.36 – 7.34 (m, 2H, H-24,26), 7.31 – 7.26 (m, 1H, H-25), 7.27 – 7.25 (m, 2H, H-23,27), 7.19 (d, <sup>3</sup>J<sub>H11,H12</sub> = 10.8 Hz, 1H, H-11), 7.07 (d, <sup>3</sup>J<sub>H7,NH7</sub> = 6.7 Hz, 1H, NH-7), 6.51 (s, 1H, H-4), 5.52 (s, 2H, H-21), 5.41 (d, <sup>2</sup>J = 13.1 Hz, 1H, H-18), 5.38 (d, <sup>2</sup>J = 13.1 Hz, 1H, H-18), 4.60 (dt, <sup>3</sup>J<sub>H6b,H7</sub> = 12.4 Hz, <sup>3</sup>J<sub>H6a,H7</sub> = 6.6 Hz, <sup>3</sup>J<sub>H7,NH7</sub> = 6.6 Hz, 1H, H-7), 3.93 (s, 3H, H-16), 3.89 (s, 3H, H-17), 3.62 (s, 3H, H-15), 2.49 (dd, <sup>2</sup>J = 13.5 Hz, <sup>3</sup>J<sub>H5b,H6a</sub> = 6.3 Hz, 1H, H-5b), 2.35 (td, <sup>2</sup>J = 13.2 Hz, <sup>3</sup>J<sub>H5a,H6a</sub> = 13.2 Hz, <sup>3</sup>J<sub>H5a,H6b</sub> = 6.7 Hz, 1H, H-5a), 2.23 (tt, <sup>2</sup>J = 12.6 Hz, <sup>3</sup>J<sub>H5a,H6a</sub> = 12.6 Hz, <sup>3</sup>J<sub>H5b,H6a</sub> = 6.2 Hz, <sup>3</sup>J<sub>H6a,H7</sub> = 6.2 Hz, 1H, H-6a), 1.96 (s, 3H, H-14), 1.83 – 1.80 (m, 1H, H-6b). <sup>13</sup>C NMR (126 MHz, CDCl<sub>3</sub>, 25°C) δ 179.7 (C-9), 169.9 (C-13), 162.7 (C-10), 153.7 (C-3), 151.7 (C-7a), 151.4 (C-1), 143.2 (C-19), 141.9 (C-2), 137.5 (C-12a), 135.5 (C-12), 134.3 (C-22), 134.2 (C-4a), 131.2 (C-8), 129.3\* (C-23,27), 129.0 (C-25), 128.4\* (C-24,26), 125.7 (C-1a), 123.7 (C-20), 115.2 (C-11), 107.4 (C-4), 63.2 (C-18), 61.6 (C-15), 61.5 (C-16), 56.3 (C-17), 53.9 (C-21), 52.5 (C-7), 36.8 (C-6), 30.0 (C-5), 23.1 (C-14). (\*-overlapped)

(*S*)-*N*-(10-((1-(4-cyanobenzyl)-1*H*-1,2,3-triazol-4-yl)methoxy)-1,2,3-trimethoxy-9-oxo-5,6,7,9-tetrahydrobenzo[*a*]heptalen-7-yl)acetamide (compound **6b**) Derivative **4f** 70 mg (0.17 mmol) was dissolved in a 6 mL mixture of THF/MeOH (3:1) and 4-(Azidomethyl)benzotrile 0.331 mL (0.17 mmol) was added. Then, to each mixture, 6.5 mg (0.05 mmol) of CH<sub>3</sub>COOCu(I) and 45 mg (0.25 mmol) of ascorbic acid was added. The solution was stirred at room temperature for a three hours and after this time, dichloromethane was added and extracted twice with 25 mL of ammonium hydroxide, twice with 25mL of water and finally twice with 25 mL of brine. The organic layer was evaporated and the synthesized derivative **6b** was purified by column chromatography with silica gel with dichloromethane/acetone (2:1) as an eluent. The product was obtained as a yellow powder. (22 mg, 24%) mp 128-132 °C. HPLC R<sub>t</sub>= 8.047 min. Anal. Calcd for C<sub>32</sub>H<sub>31</sub>N<sub>5</sub>O<sub>6</sub>: C, 66.08; H, 5.37; N, 12.04. Found: C, 66.09; H, 5.38; N, 12.05; HRMS (ESI-TOF) m/z: [M + H]<sup>+</sup> Calcd 581.2274; Found 581.2275. FT-IR (KBr): ν(N-H)<sub>amide</sub> - 3280 cm<sup>-1</sup>; ν(=CH) - 3057 cm<sup>-1</sup>; ν(C-H) - 2934 cm<sup>-1</sup>, 2850 cm<sup>-1</sup>; ν(C≡N) - 2229 cm<sup>-1</sup>; ν(C=O)<sub>amide</sub> - 1661 cm<sup>-1</sup>; ν(C=C)<sub>ar</sub> - 1611 cm<sup>-1</sup>; δ(N-H)<sub>amide</sub> - 1556 cm<sup>-1</sup>; ν(C=C) - 1487 cm<sup>-1</sup>; ν(C-O)<sub>as</sub> - 1237 cm<sup>-1</sup>; ν(C-O)<sub>s</sub> - 1171,

1094 cm<sup>-1</sup>. <sup>1</sup>H NMR (500 MHz, CDCl<sub>3</sub>, 25°C) δ 7.75 (s, 1H, H-20), 7.66 (d, <sup>3</sup>J<sub>H24,26,H23,27</sub> = 8.3 Hz, 2H, H-24,26), 7.40 (s, 1H, H-8), 7.36 (d, <sup>3</sup>J<sub>H24,26,H23,27</sub> = 8.3 Hz, 2H, H-23,27), 7.27 (d, <sup>3</sup>J<sub>H11,H12</sub> = 12.2 Hz, 1H, H-12), 7.15 (d, <sup>3</sup>J<sub>H11,H12</sub> = 10.8 Hz, 1H, H-11), 6.78 (d, <sup>3</sup>J<sub>H7,NH7</sub> = 6.7 Hz, 1H, NH-7), 6.52 (s, 1H, H-4), 5.61 (d, <sup>2</sup>J = 15.5 Hz, 1H, H-21), 5.57 (d, <sup>2</sup>J = 15.5 Hz, 1H, H-21), 5.43 (d, <sup>2</sup>J = 13.0 Hz, 1H, H-18), 5.39 (d, <sup>2</sup>J = 12.9 Hz, 1H, H-18), 4.59 (dt, <sup>3</sup>J<sub>H6,H7</sub> = 12.6 Hz, <sup>3</sup>J<sub>H6a,H7</sub> = 6.6 Hz, <sup>3</sup>J<sub>H7,NH7</sub> = 6.6 Hz, 1H, H-7), 3.93 (s, 3H, H-16), 3.89 (s, 3H, H-17), 3.63 (s, 3H, H-15), 2.51 (dd, <sup>2</sup>J = 13.6 Hz, <sup>3</sup>J<sub>H5b,H6a</sub> = 6.3 Hz, 1H, H-5b), 2.36 (td, <sup>2</sup>J = 13.2 Hz, <sup>3</sup>J<sub>H5a,H6a</sub> = 13.2 Hz, <sup>3</sup>J<sub>H5a,H6b</sub> = 6.8 Hz, 1H, H-5a), 2.23 (tt, <sup>2</sup>J = 12.6 Hz, <sup>3</sup>J<sub>H5a,H6a</sub> = 12.6 Hz, <sup>3</sup>J<sub>H5b,H6a</sub> = 6.1 Hz, <sup>3</sup>J<sub>H6a,H7</sub> = 6.1 Hz, 1H, H-6a), 1.96 (s, 3H, H-14), 1.80 (dt, <sup>2</sup>J = 11.8 Hz, <sup>3</sup>J<sub>H5a,H6b</sub> = 5.3 Hz, 1H, H-6b). <sup>13</sup>C NMR (126 MHz, CDCl<sub>3</sub>, 25°C) δ 179.6 (C-9), 169.8 (C-13), 162.6 (C-10), 153.7 (C-3), 151.6 (C-7a), 151.4 (C-1), 143.8 (C-19), 141.9 (C-2), 139.6 (C-22), 137.5 (C-12a), 135.3 (C-12), 134.1 (C-4a), 133.1\* (C-24,26), 131.3 (C-8), 128.7\* (C-23,27), 125.6 (C-1a), 123.9 (C-20), 118.2 (C-28), 115.1 (C-11), 113.0 (C-25), 107.5 (C-4), 63.1 (C-18), 61.6 (C-15), 61.5 (C-16), 56.3 (C-17), 53.9 (C-21), 52.5 (C-7), 36.9 (C-6), 29.9 (C-5), 23.1 (C-14). (\*-overlapped)

(*S*)-*N*-(1,2,3-trimethoxy-10-((1-(4-nitrobenzyl)-1*H*-1,2,3-triazol-4-yl)methoxy)-9-oxo-5,6,7,9-tetrahydrobenzo[*a*]heptalen-7-yl)acetamide (compound **6c**) Derivative **4f** 70 mg (0.17 mmol) was dissolved in a 6 mL mixture of THF/MeOH (3:1) and 1-(azidomethyl)-4-nitrobenzene 30 mg (0.17 mmol) was added. Then, to each mixture, 6.5 mg (0.05 mmol) of CH<sub>3</sub>COOCu(I) and 45 mg (0.25 mmol) of ascorbic acid was added. The solution was stirred at room temperature for a three hours and after this time, dichloromethane was added and extracted twice with 25 mL of ammonium hydroxide, twice with 25 mL of water and finally twice with 25 mL of brine. The organic layer was evaporated and the synthesized derivative **6c** was purified by column chromatography with silica gel with dichloromethane/acetone (2:1) as an eluent. The product was obtained as a yellow powder. (21 mg, 21%) mp 120-123 °C. HPLC R<sub>t</sub> = 9.480 min. Anal. Calcd for C<sub>31</sub>H<sub>31</sub>N<sub>5</sub>O<sub>8</sub>: C, 61.89; H, 5.19; N, 11.64. Found: C, 61.88; H, 5.20; N, 11.63; HRMS (ESI-TOF) m/z: [M + H]<sup>+</sup> Calcd 601.2173; Found 601.2171. FT-IR (KBr): ν(N-H)<sub>amide</sub> - 3280 cm<sup>-1</sup>; ν(=CH) - 3075 cm<sup>-1</sup>; ν(C-H) - 2933 cm<sup>-1</sup>, 2852 cm<sup>-1</sup>; ν(C=O)<sub>amide</sub> - 1661 cm<sup>-1</sup>; ν(C=C)<sub>ar</sub> - 1612 cm<sup>-1</sup>; δ(N-H)<sub>amide</sub> - 1556 cm<sup>-1</sup>; ν(NO<sub>2</sub>)<sub>as</sub> - 1523 cm<sup>-1</sup>; ν(C=C) - 1487 cm<sup>-1</sup>; ν(NO<sub>2</sub>)<sub>s</sub> - 1348 cm<sup>-1</sup>; ν(C-O)<sub>as</sub> - 1237 cm<sup>-1</sup>; ν(C-O)<sub>s</sub> - 1171, 1094 cm<sup>-1</sup>. <sup>1</sup>H NMR (500 MHz, CDCl<sub>3</sub>, 25°C) δ 8.22 (d, <sup>3</sup>J<sub>H24,26,H23,27</sub> = 8.7 Hz, 2H, H-24,26), 7.79 (s, 1H, H-20), 7.43 (d, <sup>3</sup>J<sub>H24,26,H23,27</sub> = 8.5 Hz, 2H, H-23,27), 7.40 (s, 1H, H-8) 7.27 (d, <sup>3</sup>J<sub>H11,H12</sub> = 11.0 Hz, 1H, H-12), 7.16 (s, 1H, H-11), 6.81 (d, <sup>3</sup>J<sub>H7,NH7</sub> = 6.7 Hz, 1H, NH-7), 6.51 (s, 1H, H-4), 5.64 (d, <sup>2</sup>J = 15.5 Hz, 1H, H-21), 5.62 (d, <sup>2</sup>J = 15.5 Hz, 1H, H-21), 5.43 (d, <sup>2</sup>J = 12.9 Hz, 1H, H-18), 5.39 (d, <sup>2</sup>J = 12.8 Hz, 1H, H-18), 4.59 (dt, <sup>3</sup>J<sub>H6b,H7</sub> = 12.6 Hz, <sup>3</sup>J<sub>H6a,H7</sub> = 6.5 Hz, <sup>3</sup>J<sub>H7,NH7</sub> = 6.5 Hz, 1H, H-7), 3.93 (s, 3H, H-16), 3.89 (s, 3H, H-17), 3.62 (s, 3H, H-15), 2.50 (dd, <sup>2</sup>J = 13.5 Hz, <sup>3</sup>J<sub>H5b,H6a</sub> = 6.3 Hz, 1H, H-5b), 2.36 (td, <sup>2</sup>J = 13.3 Hz, <sup>3</sup>J<sub>H5a,H6a</sub> = 13.3 Hz, <sup>3</sup>J<sub>H5a,H6b</sub> = 6.8 Hz, 1H, H-5a), 2.22 (tt, <sup>2</sup>J = 13.0 Hz, <sup>3</sup>J<sub>H5a,H6a</sub> = 13.0 Hz, <sup>3</sup>J<sub>H5b,H6a</sub> = 6.6 Hz, <sup>3</sup>J<sub>H6a,H7</sub> = 6.6 Hz, 1H, 6a), 1.96 (s, 3H, H-14), 1.79 (td, <sup>2</sup>J = 11.8 Hz, <sup>3</sup>J<sub>H5a,H6b</sub> = 6.6 Hz, 1H, H-6b). <sup>13</sup>C NMR (126 MHz, CDCl<sub>3</sub>, 25°C) δ 179.6 (C-9), 169.8 (C-13), 162.6 (C-10), 153.7 (C-3), 151.6 (C-7a), 151.4 (C-1), 148.3 (C-25), 143.9 (C-19), 141.9 (C-2), 141.4 (C-22), 137.6 (C-12a), 135.3 (C-12), 134.1 (C-4a), 131.3 (C-8), 129.0\* (C-23,27), 125.6 (C-1a),

124.5\* (C-24,26), 124.0 (C-20), 115.1 (C-11), 107.5 (C-4), 63.1 (C-18), 61.6 (C-15), 61.5 (C-16), 56.3 (C-17), 53.4 (C-21), 52.5 (C-7), 36.8 (C-6), 29.9 (C-5), 23.1 (C-14). (\*-overlapped)

(2*R*,3*S*,4*R*,5*R*,6*R*)-5-acetamido-6-(4-(((*S*)-7-acetamido-1,2,3-trimethoxy-9-oxo-5,6,7,9-tetrahydrobenzo[*a*]heptalen-10-yl)oxy)methyl)-1*H*-1,2,3-triazol-1-yl)-2-(acetoxymethyl)tetrahydro-2*H*-pyran-3,4-diyl diacetate (compound **6d**) Derivative **4f** 70 mg (0.17 mmol) was dissolved in a 6 mL mixture of THF/MeOH (3:1) and 2-Acetamido-2-deoxy- $\beta$ -D-glucopyranosyl azide 3,4,6-triacetate 61.5 mg (0.17 mmol) was added. Then, to each mixture, 6.5 mg (0.05 mmol) of CH<sub>3</sub>COOCu(I) and 45 mg (0.25 mmol) of ascorbic acid was added. The solution was stirred at room temperature for a three hours and after this time, the mixture was evaporated. Synthesized derivative **6d** was purified by column chromatography with silica gel with dichloromethane/acetone (2:1) as an eluent. The product was obtained as a yellow powder. (25 mg, 19%) mp 108-110 °C. Anal. Calcd for C<sub>38</sub>H<sub>45</sub>N<sub>5</sub>O<sub>14</sub>: C, 57.35; H, 5.70; N, 8.80. Found: C, 57.34; H, 5.71; N, 8.81; HRMS (ESI-TOF) m/z: [M + H]<sup>+</sup> Calcd 795.2963; Found 795.2964. FT-IR (KBr):  $\nu$ (N-H)<sub>amide</sub> - 3279 cm<sup>-1</sup>;  $\nu$ (=CH) - 3060 cm<sup>-1</sup>;  $\nu$ (C-H) - 2934 cm<sup>-1</sup>, 2855 cm<sup>-1</sup>;  $\nu$ (C=O)<sub>ester</sub> - 1750 cm<sup>-1</sup>;  $\nu$ (C=O)<sub>amide</sub> - 1666 cm<sup>-1</sup>;  $\nu$ (C=C)<sub>ar.</sub> - 1615 cm<sup>-1</sup>;  $\delta$ (N-H)<sub>amide</sub> - 1554 cm<sup>-1</sup>;  $\nu$ (C=C) - 1488 cm<sup>-1</sup>;  $\nu$ (C-O)<sub>as</sub> - 1238 cm<sup>-1</sup>;  $\nu$ (C-O)<sub>s</sub> - 1171, 1045 cm<sup>-1</sup>. <sup>1</sup>H NMR (500 MHz, CDCl<sub>3</sub>, 25°C)  $\delta$  8.15 (s, 1H, H-20), 7.44 (s, 1H, H-8), 7.31 (d, <sup>3</sup>J<sub>H11,H12</sub> = 10.6 Hz, 1H, H-12), 7.14 (d, <sup>3</sup>J<sub>H11,H12</sub> = 10.7 Hz, 1H, H-11), 6.81 (bs, 2H, H-21, NH-22), 6.52 (s, 1H, H-4), 6.19 (d, <sup>3</sup>J<sub>H7,NH7</sub> = 9.8 Hz, 1H, NH-7), 5.55 (t, <sup>3</sup>J<sub>H22,H23</sub> = 9.9 Hz, 1H, H-23), 5.36 (d, <sup>2</sup>J = 12.2 Hz, 1H, H-18), 5.35 (d, <sup>2</sup>J = 12.2 Hz, 1H, H-18), 5.23 (t, <sup>3</sup>J<sub>H22,H23</sub> = 9.5 Hz, 1H, H-22), 4.65 (s, 1H, H-7), 4.52 (d, <sup>3</sup>J<sub>H24,H25</sub> = 9.6 Hz, 1H, H-25), 4.28 (dd, <sup>2</sup>J = 12.6 Hz, <sup>4</sup>J<sub>H24,H32</sub> = 4.7 Hz, 1H, H-32), 4.14 (d, <sup>2</sup>J = 11.6 Hz, 1H, H-32), 4.03 (dd, <sup>3</sup>J<sub>H24,H25</sub> = 9.2 Hz, <sup>4</sup>J<sub>H24,H32</sub> = 4.6 Hz, 1H, H-24), 3.93 (s, 3H, H-16), 3.89 (s, 3H, H-17), 3.64 (s, 3H, H-15), 2.54 – 2.49 (m, 1H, H-5b), 2.40 (s, 1H, H-5a), 2.24 (s, 1H, H-6a), 2.06 (s, 3H, H-34), 2.05 – 2.04 (m, 6H, H-29,31), 1.97 (s, 3H, H-14), 1.91 (s, 1H, H-6b), 1.74 (s, 3H, H-27). <sup>13</sup>C NMR (126 MHz, CDCl<sub>3</sub>, 25°C)  $\delta$  179.6 (C-9), 170.9\* (C-28,30), 170.8 (C-33), 169.8 (C-13), 169.5 (C-26), 162.8 (C-10), 153.7 (C-3), 151.7 (C-7a), 151.3 (C-1), 144.6 (C-19), 141.8 (C-2), 137.8 (C-12a), 135.4 (C-12), 134.2 (C-4a), 131.5 (C-8), 125.7 (C-1a), 123.4 (C-20), 115.2 (C-11), 107.5 (C-4), 85.9 (C-21), 75.0 (C-24), 72.5 (C-23), 68.2 (C-25), 62.9 (C-18), 61.9 (C-32), 61.6 (C-15), 61.5 (C-16), 56.3 (C-17), 54.0 (C-22), 52.3 (C-7), 36.9 (C-6), 30.0 (C-5), 23.1 (C-14), 23.0 (C-27), 20.9 (C-34), 20.8 (C-31), 20.7 (C-29). (\*-overlapped)

*N*-(((*S*)-10-((1-((2*S*,5*R*)-2-(hydroxymethyl)-5-(5-methyl-2,4-dioxo-3,4-dihydropyrimidin-1(2*H*)-yl)tetrahydrofuran-3-yl)-1*H*-1,2,3-triazol-4-yl)methoxy)-1,2,3-trimethoxy-9-oxo-5,6,7,9-tetrahydrobenzo[*a*]heptalen-7-yl)acetamide (compound **6e**) Derivative **4f** 70 mg (0.17 mmol) was dissolved in a 6 mL mixture of THF/MeOH (3:1) and AZT 31.5 mg (0.17 mmol) was added. Then, to each mixture, 6.5 mg (0.05 mmol) of CH<sub>3</sub>COOCu(I) and 45 mg (0.25 mmol) of ascorbic acid was added. The solution was stirred at 60°C for a three hours and after this time, the mixture was evaporated. Synthesized derivative **6e** was purified by column chromatography with silica gel with dichloromethane/methanol (25:1) as an eluent. The product was obtained as a yellow powder. (11 mg, 10%) mp 209-212 °C. HPLC R<sub>t</sub> = 4.365 min. Anal. Calcd for C<sub>34</sub>H<sub>38</sub>N<sub>6</sub>O<sub>10</sub>: C, 59.12; H, 5.55; N, 12.17. Found: C, 59.13; H, 5.54; N, 12.16; HRMS (ESI-TOF) m/z: [M + H]<sup>+</sup> Calcd 690.2649; Found 690.2647. FT-IR (KBr):

$\nu(\text{N-H})^*_{\text{amide, substituent}}$ ,  $\nu(\text{O-H})^*$  - 3415  $\text{cm}^{-1}$ ;  $\nu(\text{=CH})$  - 3062  $\text{cm}^{-1}$ ;  $\nu(\text{C-H})$  - 2934  $\text{cm}^{-1}$ ;  $\nu(\text{C=O})^*_{\text{amide, substituent}}$  - 1689  $\text{cm}^{-1}$ ;  $\nu(\text{C=C})_{\text{ar.}}$  1613  $\text{cm}^{-1}$ ;  $\delta(\text{N-H})_{\text{amide}}$  - 1550  $\text{cm}^{-1}$ ;  $\nu(\text{C=C})$  - 1487  $\text{cm}^{-1}$ ;  $\nu(\text{C=C})_{\text{substituent}}$  - 1463  $\text{cm}^{-1}$ ,  $\nu(\text{C-O})_{\text{as}}$  - 1272  $\text{cm}^{-1}$ ;  $\nu(\text{C-O})_{\text{s}}$  - 1142, 1095  $\text{cm}^{-1}$ .  $^1\text{H}$  NMR (500 MHz, Chloroform-d)  $\delta$  10.08 (vbs, 1H, 28-NH), 8.27 (bs, 1H, H-20), 7.71 (s, 1H, H-8), 7.55 – 7.28 (m, 2H, H-12,26), 7.16 (s, 1H, H-11), 6.52 (s, 1H, H-4), 6.29 (s, 1H, NH-7), 5.63 – 5.14 (m, 2H, H-18), 5.11 – 4.98 (m, 1H, H-23), 4.59 (bs, 1H, H-21), 4.39 (s, 1H, H-7), 3.90 (s, 5H, H-16,25), 3.89 (s, 4H, H-17,22), 3.83 – 3.77 (m, 2H, H-24), 3.62 (s, 3H, H-15), 2.88 (s, 1H, OH-25), 2.58 – 2.38 (m, 1H, H-5b), 2.38 – 2.24 (m, 1H, H-5a), 2.20 – 2.00 (m, 1H, H-6a), 1.95 (bs, 4H, H-6b,14), 1.81 (s, 3H, H-30).  $^{13}\text{C}$  NMR (126 MHz,  $\text{CDCl}_3$ , 25°C)  $\delta$  179.6 (C-9), 170.4 (C-13), 164.5 (C-28), 162.2 (C-10), 153.8 (C-3), 151.2 (C-7a), 150.9 (C-1), 150.4 (C-29), 144.6 (C-19), 141.7 (C-2), 138.1 (C-12a), 135.6 (C-26), 135.5 (C-12), 134.4\* (C-4a,8), 125.5\* (C-1a,20), 115.8 (C-11), 110.9 (C-27), 107.6 (C-4), 85.1 (C-23), 83.8 (C-22), 70.5 (C-21), 66.3 (C-25), 62.9 (C-18), 61.6 (C-15), 61.5 (C-16), 56.3 (C-17), 52.4 (C-7), 38.3 (C-6), 32.1 (C-24), 29.8 (C-5), 23.0 (C-14), 12.6 (C-30). (\*-overlapped)

(4*E*,6*Z*,8*S*,9*S*,10*E*,12*S*,13*R*,14*S*,16*R*)-19-(((2-(4-(((*S*)-7-acetamido-1,2,3-trimethoxy-9-oxo-5,6,7,9-tetrahydrobenzo[*a*]heptalen-10-yl)oxy)methyl)-1*H*-1,2,3-triazol-1-yl)ethyl)amino)-13-hydroxy-8,14-dimethoxy-4,10,12,16-tetramethyl-3,20,22-trioxo-2-azabicyclo[16.3.1]docosa-1(21),4,6,10,18-pentaen-9-yl carbamate (compound **6f**) Derivative **4f** 70 mg (0.17 mmol) was dissolved in a 4 mL mixture of TBA/ $\text{H}_2\text{O}$  (1:1) and **9** 70 mg (0.11 mmol) was added. Then, to each mixture, 6.5 mg (0.05 mmol) of  $\text{CH}_3\text{COOCu(I)}$  and 45 mg (0.25 mmol) of ascorbic acid was added. The solution was stirred at room temperature for a 72 hours and after this time, the mixture was evaporated. Synthesized derivative **6f** was purified by column chromatography with silica gel with dichloromethane/methanol (25:1) as an eluent. The product was obtained as a violet powder. (71 mg, 41%) mp 181-183 °C. HPLC  $R_t$ = 4.374 min. Anal. Calcd for  $\text{C}_{54}\text{H}_{67}\text{N}_7\text{O}_{14}$ : C, 62.47; H, 6.51; N, 9.44. Found: C, 62.48; H, 6.50; N, 9.45; HRMS (ESI-TOF)  $m/z$ :  $[\text{M} + \text{H}]^+$  Calcd 1037.4746; Found 1037.4748. FT-IR (KBr):  $\nu_{\text{s}}(\text{N-H})_{\text{carbamate}}$  - 3463  $\text{cm}^{-1}$ ;  $\nu_{\text{s}}(\text{N-H})_{\text{lactam}}$  - 3334  $\text{cm}^{-1}$ ;  $\nu(\text{N-H})^*_{\text{amide}}$ ,  $\nu(\text{O-H})$  - 3201  $\text{cm}^{-1}$ ;  $\nu(\text{=CH})$  - 3068  $\text{cm}^{-1}$ ;  $\nu(\text{C-H})$  - 2934  $\text{cm}^{-1}$ ;  $\nu(\text{C=O})_{\text{carbamate}}$  - 1720  $\text{cm}^{-1}$ ;  $\nu(\text{C=O})^*_{\text{lactam, amide}}$  - 1685  $\text{cm}^{-1}$ ;  $\nu(\text{C=O})_{\text{quinone}}$  - 1651  $\text{cm}^{-1}$ ;  $\nu(\text{C=C})$  - 1613  $\text{cm}^{-1}$ ;  $\delta(\text{N-H})^*_{\text{lactam,amide}}$  - 1586  $\text{cm}^{-1}$ ;  $\delta(\text{N-H})_{\text{carbamate}}$  - 1488  $\text{cm}^{-1}$ ;  $\nu(\text{C-N})_{\text{carbamate}}$  - 1322  $\text{cm}^{-1}$ ;  $\nu(\text{C-O})_{\text{as}}$  - 1241  $\text{cm}^{-1}$ ;  $\nu(\text{C-O-C})_{\text{carbamate}}$  - 1193  $\text{cm}^{-1}$ ;  $\nu(\text{C-O})_{\text{s}}$  - 1141, 1096  $\text{cm}^{-1}$ ;  $\nu(\text{C-O})_{\text{methoxy}}$  - 1050  $\text{cm}^{-1}$ .  $^1\text{H}$  NMR (500 MHz,  $\text{CDCl}_3$ , 25°C)  $\delta$  9.07 (s, 1H, NH-1'), 8.02 (s, 1H, H-20), 7.47 (d,  $^3J_{\text{H}7',\text{NH}7'} = 6.5$  Hz, 1H, NH-7), 7.44 (s, 1H, H-8), 7.30 – 7.27 (m, 1H, H-12), 7.15 (s, 1H, H-19'), 7.12 (s, 1H, H-11), 6.91 (d,  $J^3_{\text{H}3',\text{H}4'} = 11.7$  Hz, 1H, H-3'), 6.54 (d,  $J^3_{\text{H}3',\text{H}4'} = 11.2$  Hz, 1H, H-4'), 6.50 (s, 2H, H-4, NH-17'), 5.85 – 5.81 (m, 1H, H-5'), 5.81 – 5.78 (m, 1H, H-9'), 5.32 (d,  $^2J = 12.5$  Hz, 1H, H-18), 5.28 (d,  $^2J = 12.5$  Hz, 1H, H-18), 5.25 (s, 2H, NH<sub>2</sub>-24'), 5.10 (s, 1H, H-7'), 4.69 – 4.62 (m, 1H, H-29'), 4.61 – 4.53 (m, 2H, H-7,29'), 4.30 – 4.24 (m, 1H, H-6'), 4.16 – 4.07 (m, 1H, 30'-H), 4.08 – 3.99 (m, 1H, H-30'), 3.89 (s, 3H, H-16), 3.87 (s, 3H, H-17), 3.60 (s, 3H, H-15), 3.59 – 3.52 (m, 1H, H-11'), 3.40 – 3.33 (m, 1H, H-12'), 3.30 (s, 3H, H-27'), 3.23 (s, 3H, H-23'), 2.75 – 2.67 (m, 1H, H-10'), 2.63 (d,  $^2J = 13.3$  Hz, 1H, H-15'), 2.60 – 2.52 (m, 1H, OH-11'), 2.48 (dd,  $^2J = 13.4$  Hz,  $^3J_{\text{H}5\text{b},\text{H}6\text{a}} = 6.1$  Hz, 1H, H-5b), 2.34 (dq,  $^3J_{\text{H}5\text{a},\text{H}6\text{a}} = 13.0$  Hz,  $^3J_{\text{H}5\text{a},\text{H}6\text{b}} = 7.0$  Hz, 1H, H-5a), 2.28 – 2.22 (m, 1H, H-15'), 2.20 – 2.15 (m, 1H, H-6a), 1.97 (s, 3H, H-22'), 1.94 (s, 3H, H-14), 1.86 – 1.78 (m, 1H, H-6b), 1.75 (s, 3H, H-25'), 1.73 (s, 2H, H-13'), 1.67 (s, 1H, H-14'), 0.93

(d,  $^3J_{H10,H26} = 6.8$  Hz, 3H, H-26'), 0.88 (d,  $^3J_{H14,H28} = 6.3$  Hz, 3H, H-28').  $^{13}\text{C}$  NMR (126 MHz,  $\text{CDCl}_3$ , 25°C)  $\delta$  184.3 (C-18'), 180.6 (C-21'), 179.5 (C-9), 170.1 (C-13), 168.3 (C-1'), 162.6 (C-10), 156.5 (C-24'), 153.6 (C-3), 152.1 (C-7a), 151.1 (C-1), 145.3 (C-17'), 142.4 (C-19), 141.6 (C-2), 140.5 (C-20'), 137.6 (C-12a), 136.1 (C-5'), 135.3 (C-12), 134.9 (C-2'), 134.2 (C-4a), 133.5 (C-9'), 133.2 (C-8'), 131.3 (C-8), 127.1 (C-3'), 126.5 (C-4'), 125.5 (C-1a), 125.2 (C-20), 114.8 (C-11), 110.9 (C-16'), 109.2 (C-19'), 107.4 (C-4), 81.6 (C-7'), 81.3 (C-6'), 81.3 (C-12'), 72.6 (C-11'), 62.7 (C-18), 61.5 (C-15), 61.4 (C-16), 57.1 (C-23'), 56.8 (C-27'), 56.1 (C-17), 52.3 (C-7), 49.8 (C-29'), 45.2 (C-30'), 36.5 (C-6), 34.9 (C-13'), 34.2 (C-15'), 32.3 (C-10'), 29.9 (C-5), 28.7 (C-14'), 22.9\* (C-14,28'), 12.9 (C-25'), 12.6 (C-22'), 12.5 (C-26'). (\*-overlapped)

(*S,E*)-*N*-(1,2,3-trimethoxy-9-((4-(2-(naphthalen-2-yl)vinyl)benzyl)oxy)-10-oxo-5,6,7,10-tetrahydrobenzo[*a*]heptalen-7-yl)acetamide (compound **7a**). Derivative **3b** 60 mg (0.12 mmol) was dissolved in a 1 mL DMF and 2-vinylnaphthalene 37 mg (0.24 mmol) was added. Then 1.42 mg (0.006 mmol) of  $\text{Pd}(\text{OCOCH}_3)_2$  and 49.7 mg (0.36 mmol) of  $\text{K}_2\text{CO}_3$  was added. The solution was stirred at 90 °C for a 4 h after this time, the reaction mixture was extracted in the solvent system EtOAc:H<sub>2</sub>O. The organic layer was evaporated and the synthesized derivative **7a** was purified by column chromatography with silica gel with dichloromethane/acetone (from 4:1 to 2:1) as an eluent. The product was obtained as a cream-colored powder. (24 mg, 40%): HPLC Rt = 13.858, Anal. Calcd C<sub>40</sub>H<sub>37</sub>NO<sub>6</sub>: C, 76.53; H, 5.94; N, 2.23. Found C, 76.51; H, 5.93; N, 2.25; HRMS (ESI-TOF) m/z: [M + Na]<sup>+</sup> Calcd for C<sub>40</sub>H<sub>37</sub>NNaO<sub>6</sub><sup>+</sup> 650.2519; Found 650.2523.  $^1\text{H}$  NMR (500 MHz,  $\text{CDCl}_3$ , T = 298 K)  $\delta$  7.82 (d,  $^4J_{H28, H36} = 1.9$  Hz, 1H, H-36), 7.79 (d,  $^3J_{H28, H29} = 8.8$  Hz, 1H, H-29), 7.79 (m, 1H, H-34), 7.78 (m, 1H, H-31), 7.69 (dd,  $^3J_{H28, H29} = 8.7$  Hz,  $^4J_{H28, H36} = 1.9$  Hz, 1H, H-28), 7.53 (d,  $^3J_{H20,H21}$  and  $H23,H24} = 8.3$  Hz, 2H, H-21 + H-23), 7.46 (m, 1H, H-32), 7.44 (m, 1H, H-33), 7.42 (d,  $^3J_{H11,H12} = 12.7$  Hz, 1H, H-12), 7.40 (d,  $^3J_{H20,H21}$  and  $H23,H24} = 8.2$  Hz, 2H, H-20 + H-24), 7.24 (d,  $^3J_{H25, H26} = 16.5$  Hz, 1H, H-26), 7.17 (d,  $^3J_{H25, H26} = 16.5$  Hz, 1H, H-25), 7.15 (d,  $^3J_{H11,H12} = 12.8$  Hz, 1H, H-11), 7.13 (s, 1H, H-8), 6.51 (s, 1H, H-4), 6.45 (d,  $^3J_{H7,NH} = 6.4$  Hz, 1H, 7-NH), 5.32 (m, 2H, H-18), 4.53 (dt,  $^3J_{H6b, H7} = 12.7$  Hz,  $^3J_{H6a, H7} = 6.4$  Hz,  $^3J_{H7,NH} = 6.4$  Hz, 1H, H-7), 3.92 (s, 3H, H-16), 3.85 (s, 3H, H-17), 3.66 (s, 3H, H-15), 2.43 (dd,  $^2J = 13.1$  Hz,  $^3J_{H5b,H6a} = 6.2$  Hz, 1H, H-5b), 2.28 (td,  $^2J = 13.0$  Hz,  $^3J_{H5a, H6a} = 13.0$  Hz,  $^3J_{H5a, H6b} = 7.2$  Hz, 1H, H-5a), 2.18 (tt,  $^2J = 13.1$  Hz,  $^3J_{H5a,H6a} = 13.1$  Hz,  $^3J_{H5b,H6a} = 6.3$  Hz,  $^3J_{H6a, H7} = 6.3$  Hz, 1H, H-6a), 1.88 (m, 1H, H-6b), 1.84 (s, 3H, H-14),  $^{13}\text{C}$  NMR (126 MHz,  $\text{CDCl}_3$ , T = 298 K)  $\delta$  179.7 (C-10), 169.9 (C-13), 163.1 (C-9), 153.8 (C-3), 151.1 (C-1), 144.1 (C-7a), 141.8 (C-2), 141.3 (C-12), 137.5 (C-22), 135.3 (C-12a + C-19), 134.8 (C-4a), 134.6 (C-27), 134.5 (C-11), 133.8 (C-30), 133.2 (C-35), 129.5 (C-26), 128.5 (C-25), 128.3 (C-29), 128.1 (C-34), 127.8 (C-31), 127.5 (C-20 + C-24), 127.0 (C-21 + C-23 + C-36), 126.5 (C-32), 126.2 (C-33), 125.9 (C-1a), 123.5 (C28), 113.1 (C-8), 107.6 (C-4), 71.0 (C-18), 61.6 (C-15), 61.5 (C-16), 56.2 (C-17), 52.8 (C-7), 38.5 (C-6), 30.0 (C-5), 22.9 (C-14).

(*S,E*)-*N*-(1,2,3-trimethoxy-10-oxo-9-((4-(2-(pyridin-2-yl)vinyl)benzyl)oxy)-5,6,7,10-tetrahydrobenzo[*a*]heptalen-7-yl)acetamide (compound **7b**). Derivative **3b** 60 mg (0.12 mmol) was dissolved in a 1 mL DMF and 2-vinylpyridine 25 mg (0.24 mmol) was added. Then 1.42 mg (0.006 mmol) of  $\text{Pd}(\text{OCOCH}_3)_2$  and 49.7 mg (0.36 mmol) of  $\text{K}_2\text{CO}_3$  was

added. The solution was stirred at 90 °C for a 4 h after this time, the reaction mixture was extracted in the solvent system EtOAc:H<sub>2</sub>O. The organic layer was evaporated and the synthesized derivative **7b** was purified by column chromatography with silica gel with dichloromethane/acetone (from 4:1 to 1:1) as an eluent. The product was obtained as a cream-colored powder. (21.2 mg, 38%), HPLC Rt = 8.398, Anal. Calcd C<sub>35</sub>H<sub>34</sub>N<sub>2</sub>O<sub>6</sub>: C, 72.65; H, 5.92; N, 4.84. Found C, 72.64; H, 5.95; N, 4.81; HRMS (ESI-TOF) m/z: [M + H]<sup>+</sup> Calcd for C<sub>35</sub>H<sub>35</sub>N<sub>2</sub>O<sub>6</sub><sup>+</sup> 579.2490; Found 579.2493. <sup>1</sup>H NMR (500 MHz, CDCl<sub>3</sub>, T = 298 K) δ 8.56 (ddd, <sup>3</sup>J<sub>H30, H31</sub> = 4.8 Hz, <sup>4</sup>J<sub>H29, H31</sub> = 1.8 Hz, <sup>4</sup>J<sub>H28, H31</sub> = 0.8 Hz, 1H, H-31), 7.63 (dt, <sup>3</sup>J<sub>H28, H29</sub> = 7.7 Hz, <sup>3</sup>J<sub>H29, H30</sub> = 7.7 Hz, <sup>4</sup>J<sub>H29, H31</sub> = 1.9 Hz, 1H, H-29), 7.56 (d, <sup>3</sup>J<sub>H25, H26</sub> = 16.1 Hz, 1H, H-26), 7.51 (d, <sup>3</sup>J<sub>H20, H21 and H23, H24</sub> = 8.2 Hz, 2H, H-21 + H-23), 7.42 (d, <sup>3</sup>J<sub>H11, H12</sub> = 12.7 Hz, 1H, H-12), 7.36 (d, <sup>3</sup>J<sub>H20, H21 and H23, H24</sub> = 8.2 Hz, 2H, H-20 + H-24), 7.36 (m, 1H, H-28), 7.17 (s, 1H, H-8), 7.14 (d, <sup>3</sup>J<sub>H11, H12</sub> = 12.6 Hz, 1H, H-11), 7.12 (m, 1H, H-30), 7.11 (d, <sup>3</sup>J<sub>H25, H26</sub> = 16.1 Hz, 1H, H-25), 6.94 (d, <sup>3</sup>J<sub>H7, NH</sub> = 6.3 Hz, 1H, 7-NH), 6.50 (s, 1H, H-4), 5.27 (m, 2H, H-18), 4.51 (dt, <sup>3</sup>J<sub>H6b, H7</sub> = 12.7 Hz, <sup>3</sup>J<sub>H6a, H7</sub> = 6.4 Hz, <sup>3</sup>J<sub>H7, NH</sub> = 6.4 Hz, 1H, H-7), 3.89 (s, 3H, H-16), 3.84 (s, 3H, H-17), 3.63 (s, 3H, H-15), 2.45 (dd, <sup>2</sup>J = 13.4 Hz, <sup>3</sup>J<sub>H5b, H6a</sub> = 6.4 Hz, 1H, H-5b), 2.24 (td, <sup>2</sup>J = 13.1 Hz, <sup>3</sup>J<sub>H5a, H6a</sub> = 13.1 Hz, <sup>3</sup>J<sub>H5a, H6b</sub> = 7.2 Hz, 1H, H-5a), 2.14 (m, 1H, H-6a), 1.90 (td, <sup>2</sup>J = 12.4 Hz, <sup>3</sup>J<sub>H6a, H7</sub> = 12.4 Hz, <sup>3</sup>J<sub>H5b, H6a</sub> = 7.2 Hz, 1H, H-6b), 1.80 (s, 3H, H-14), <sup>13</sup>C NMR (126 MHz, CDCl<sub>3</sub>, T = 298 K) δ 179.6 (C-10), 170.0 (C-13), 163.0 (C-9), 155.5 (C-27), 153.7 (C-3), 151.0 (C-1), 149.7 (C-31), 144.4 (C-7a), 141.6 (C-2), 141.4 (C-12), 136.7 (C-22 + C-29), 136.0 (C-19), 135.3 (C-12a), 134.9 (C-4a), 134.3 (C-11), 132.0 (C-26), 128.5 (C-25), 127.5 (C-20 + C-21 + C-23 + C-24), 125.9 (C-1a), 122.4 (C-28), 122.3 (C-30), 113.1 (C-8), 107.6 (C-4), 70.8 (C-18), 61.6 (C-15), 61.5 (C-16), 56.2 (C-17), 52.7 (C-7), 38.3 (C-6), 30.0 (C-5), 22.8 (C-14).

(*S,E*)-*N*-(1,2,3-trimethoxy-10-oxo-9-((4-(2-(quinolin-3-yl)vinyl)benzyl)oxy)-5,6,7,10-tetrahydrobenzo[*a*]heptalen-7-yl)acetamide (compound **7c**). Derivative **3j** 50 mg (0.1 mmol) was dissolved in a 1 mL DMF and 3-bromoquinoline 41.6 mg (0.2 mmol) was added. Then 1.18 mg (0.005 mmol) of Pd(OCOCH<sub>3</sub>)<sub>2</sub> and 41.4 mg (0.3 mmol) of K<sub>2</sub>CO<sub>3</sub> was added. The solution was stirred at 90 °C for a 24 h after this time, the reaction mixture was extracted in the solvent system EtOAc:H<sub>2</sub>O. The organic layer was evaporated and the synthesized derivative **7c** was purified by column chromatography with silica gel with dichloromethane/acetone (from 4:1 to 1:1) as an eluent. The product was obtained as a cream-colored powder. (22.5 mg, 36%), HPLC Rt = 9.931, Anal. Calcd C<sub>39</sub>H<sub>36</sub>N<sub>2</sub>O<sub>6</sub>: C, 74.50; H, 5.77; N, 4.46; N, 2.33. Found C, 74.47; H, 5.79; N, 4.43; HRMS (ESI-TOF) m/z: [M + H]<sup>+</sup> Calcd for C<sub>39</sub>H<sub>37</sub>N<sub>2</sub>O<sub>6</sub><sup>+</sup> 629.2646; Found 629.2644. <sup>1</sup>H NMR (500 MHz, CDCl<sub>3</sub>, T = 298 K) δ 9.06 (d, <sup>4</sup>J<sub>H28, H35</sub> = 2.3 Hz, 1H, H-35), 8.11 (d, <sup>4</sup>J<sub>H28, H35</sub> = 2.5 Hz, 1H, H-28), 8.04 (d, <sup>3</sup>J<sub>H32- H33</sub> = 8.4 Hz, 1H, H-33), 7.65 (ddd, <sup>3</sup>J<sub>H32, H33</sub> = 8.4 Hz, <sup>3</sup>J<sub>H31, H32</sub> = 6.9 Hz, <sup>4</sup>J<sub>H30, H32</sub> = 1.5 Hz, 1H, H-32), 7.50 (d, <sup>3</sup>J<sub>H20, H21 and H23, H24</sub> = 8.2 Hz, 2H, H-21 + H-23), 7.42 (d, <sup>3</sup>J<sub>H11, H12</sub> = 12.8 Hz, 1H, H-12), 7.40 (d, <sup>3</sup>J<sub>H20, H21 and H23, H24</sub> = 8.2 Hz, 2H, H-20 + H-24), 7.24 (d, <sup>3</sup>J<sub>H25, H26</sub> = 16.3 Hz, 1H, H-25), 7.17 (d, <sup>3</sup>J<sub>H11, H12</sub> = 12.9 Hz, 1H, H-11), 7.17 (s, 1H, H-8), 7.16 (d, <sup>3</sup>J<sub>H25, H26</sub> = 16.6 Hz, 1H, H-26), 6.78 (d, <sup>3</sup>J<sub>H7, NH</sub> = 6.4 Hz, 1H, 7-NH), 6.52 (s, 1H, H-4), 5.30 (s, 2H, H-18), 4.53 (dt, <sup>3</sup>J<sub>H6b, H7</sub> = 12.4 Hz, <sup>3</sup>J<sub>H6a, H7</sub> = 6.2 Hz, <sup>3</sup>J<sub>H7, NH</sub> = 6.2 Hz, 1H, H-7), 3.91 (s, 3H, H-16), 3.85 (s, 3H, H-17), 3.65 (s, 3H, H-15), 2.44 (dd, <sup>2</sup>J = 13.0 Hz, <sup>3</sup>J<sub>H5b, H6a</sub> = 6.3 Hz, 1H, H-5b), 2.28 (td, <sup>2</sup>J = 13.0 Hz, <sup>3</sup>J<sub>H5a, H6a</sub> = 13.0 Hz, <sup>3</sup>J<sub>H5a, H6b</sub> = 7.1 Hz, 1H, H-5a), 2.20 (tt, <sup>2</sup>J = 13.1,

$^3J_{H5a,H6a} = 13.1$  Hz,  $^3J_{H5b,H6a} = 6.5$  Hz,  $^3J_{H6a,H7} = 6.5$  Hz, 1H, H-6a), 1.89 (m, 1H, H-6b), 1.85 (s, 3H, H-14),  $^{13}\text{C}$  NMR (126 MHz,  $\text{CDCl}_3$ , T = 298 K)  $\delta$  179.7 (C-10), 169.9 (C-13), 163.0 (C-9), 153.8 (C-3), 151.1 (C-1), 149.3 (C-35), 147.5 (C-34), 144.2 (C-7a), 141.7 (C-2), 141.4 (C-12), 136.8 (C-22), 135.9 (C-19), 135.4 (C-12a), 134.8 (C-4a), 134.5 (C-11), 132.7 (C-28), 130.13 (C-25), 130.11 (C-29), 129.5 (C-32), 129.2 (C-33), 128.2 (C-27), 128.0 (C-30), 127.6 (C-20 + C-24), 127.2 (C-31), 127.1 (C-21 + C-23), 125.9 (C-1a), 125.8 (C-26), 113.1 (C-8), 107.6 (C-4), 70.8 (C-18), 61.6 (C-15), 61.5 (C-16), 56.2 (C-17), 52.8 (C-7), 38.4 (C-6), 30.0 (C-5), 22.9 (C-14).

(4*E*,6*Z*,8*S*,9*S*,10*E*,12*S*,13*R*,14*S*,16*R*)-19-(((4-((*E*)-4-(((*S*)-7-acetamido-1,2,3-trimethoxy-10-oxo-5,6,7,10-tetrahydrobenzo[*a*]heptalen-9-yl)oxy)methyl)styryl)benzyl)amino)-13-hydroxy-8,14-dimethoxy-4,10,12,16-tetramethyl-3,20,22-trioxo-2-azabicyclo[16.3.1]docosa-1(21),4,6,10,18-pentaen-9-yl carbamate (compound **7d**). Derivative **3j** 30 mg (0.06 mmol) was dissolved in a 0.5 mL DMF and **10** 30 mg (0.04 mmol) was added. Then 0.71 mg (0.003 mmol) of  $\text{Pd}(\text{OCOCH}_3)_2$  and 50  $\mu\text{L}$  of TEA was added. The solution was stirred at room temperature for a week and after this time, ethyl acetate was added and extracted twice with 25 mL of water. The organic layer was evaporated and the synthesized derivative **7d** was purified by column chromatography with silica gel with dichloromethane/methanol (75:1) as an eluent. The product was obtained as a violet powder. (26 mg, 59%), HPLC  $R_t = 8.115$  min. Anal. Calcd for  $\text{C}_{65}\text{H}_{74}\text{N}_4\text{O}_{14}$ : C, 68.77; H, 6.57; N, 4.93. Found: C, 68.76; H, 6.58; N, 4.93; HRMS (ESI-TOF)  $m/z$ :  $[\text{M} + \text{H}]^+$  Calcd 1134.5202; Found 1134.5204. FT-IR (KBr):  $\nu(\text{N-H})^*$ amide, substituent,  $\nu(\text{O-H})^*$  -  $3480\text{cm}^{-1}$ ;  $\nu_s(\text{N-H})_{\text{lactam}}$  -  $3320\text{cm}^{-1}$ ;  $\nu(\text{=CH})$  -  $3191\text{cm}^{-1}$ ;  $\nu(\text{C-H})$  -  $2931\text{cm}^{-1}$ ;  $\nu(\text{C=O})_{\text{carbamate}}$  -  $1722\text{cm}^{-1}$ ;  $\nu(\text{C=O})^*$  lactam, amide -  $1685\text{cm}^{-1}$ ;  $\nu(\text{C=O})_{\text{quinone}}$  -  $1651\text{cm}^{-1}$ ;  $\nu(\text{C=C})$  -  $1610\text{cm}^{-1}$ ;  $\delta(\text{N-H})^*_{\text{lactam,amide}}$  -  $1562\text{cm}^{-1}$ ;  $\delta(\text{N-H})_{\text{carbamate}}$  -  $1487\text{cm}^{-1}$ ;  $\nu(\text{C-N})_{\text{carbamate}}$  -  $1321\text{cm}^{-1}$ ;  $\nu(\text{C-O})_{\text{as}}$  -  $1264\text{cm}^{-1}$ ;  $\nu(\text{C-O-C})_{\text{carbamate}}$  -  $1193\text{cm}^{-1}$ ;  $\nu(\text{C-O})_s$  -  $1139, 1096\text{cm}^{-1}$ ,  $\nu(\text{C-O})_{\text{methoxy}}$  -  $1047\text{cm}^{-1}$ .  $^1\text{H}$  NMR (500 MHz,  $\text{CDCl}_3$ ,  $25^\circ\text{C}$ )  $\delta$  9.15 (s, 1H, NH-1'), 7.56 – 7.46 (m, 3H, H-20,24, NH-7), 7.44 – 7.38 (m, 3H, H-12,32',34'), 7.37 – 7.32 (m, 1H, H-26), 7.30 (s, 1H, H-19'), 7.28 – 7.24 (m, 3H, H-21,23,25), 7.22 – 7.14 (m, 1H, H-11), 7.10 (d,  $^3J_{H31'/H35',H32'/34'} = 8.0$  Hz, 2H, H-31',35'), 7.00 (s, 1H, H-8), 6.95 (d,  $^3J_{H3',H4'} = 11.4$  Hz, 1H, H-3'), 6.58 (t,  $^3J_{H3',H4'} = 11.4$  Hz, 1H, H-4'), 6.53 (s, 1H, H-4), 6.50 – 6.42 (m, 1H, NH-17'), 5.92 – 5.85 (m, 1H, H-5'), 5.84 – 5.75 (m, 1H, H-9'), 5.32 (d,  $^2J = 7.5$  Hz, 2H, H-18), 5.18 (s, 1H, H-7'), 4.90 (s, 2H, NH<sub>2</sub>-24'), 4.80 – 4.72 (m, 1H, H-29'), 4.67 – 4.58 (m, 1H, H-29'), 4.55 – 4.44 (m, 1H, H-7), 4.34 – 4.28 (m, 1H, H-6'), 4.18 (bs, 1H, OH-11'), 3.93 (s, 3H, H-16), 3.88 (s, 3H, H-17), 3.67 (s, 3H, H-15), 3.61 – 3.55 (m, 1H, H-11'), 3.47 – 3.42 (m, 1H, H-12'), 3.36 (s, 3H, H-27'), 3.27 (s, 3H, H-23'), 2.78 – 2.71 (m, 1H, H-10'), 2.67 (d,  $^2J = 13.8$  Hz, 1H, H-15'), 2.51 – 2.40 (m, 2H, H-5b,15'), 2.34 – 2.27 (m, 1H, H-5a), 2.27 – 2.17 (m, 1H, H-6a), 2.03 (s, 3H, H-22'), 1.83 (s, 3H, H-14), 1.80 (s, 4H, H-6b,25'), 1.78 (s, 3H, H-13',14'), 1.03 (d,  $^3J_{H10,H26} = 6.4$  Hz, 3H, H-26'), 1.00 (d,  $^3J_{H14,H28} = 6.8$  Hz, 3H, H-28').  $^{13}\text{C}$  NMR (126 MHz,  $\text{CDCl}_3$ ,  $25^\circ\text{C}$ )  $\delta$  183.9 (C-18'), 181.2 (C-21'), 179.8 (C-10), 169.7 (C-13), 168.5 (C-1'), 163.1 (C-9), 156.2 (C-24'), 153.8 (C-3), 151.2 (C-1), 144.8 (C-17'), 143.4 (C-7a), 141.8 (C-2), 141.4 (C-20'), 141.1 (C-12), 137.2 (C-33'), 136.3 (C-5'), 136.0 (C-30'), 135.3\* (C-12a,19), 135.1\* (C-22, 2'), 134.8 (C-4a), 134.7 (C-11), 133.9 (C-9'), 133.0 (C-8'), 128.8 (C-26), 128.5 (C-25), 128.3\* (C-31',35'), 127.4\* (C-20,24), 127.3\* (C-32',34'), 127.1 (C-3'), 127.0 (C-21,23), 126.7 (C-4'), 125.9 (C-1a), 113.1 (C-8), 109.2 (C-16'), 109.0



(C-19'), 107.6 (C-4), 81.8 (C-7'), 81.6 (C-6'), 81.3 (C-12'), 72.8 (C-11'), 71.0 (C-18), 61.6 (C-15), 61.6 (C-16), 57.3 (C-23'), 56.9 (C-27'), 56.3 (C-17), 52.8 (C-7), 50.0 (C-29'), 38.6 (C-6), 35.2 (C-13'), 34.6 (C-15'), 32.5 (C-10'), 30.0 (C-5), 28.7 (C-14'), 23.1(C-28'), 23.0 (C-14), 12.9 (C-25'), 12.8 (C-22'), 12.5 (C-26'). (\*-overlapped)

(*S,E*)-*N*-(1,2,3-trimethoxy-10-((4-(2-(naphthalen-2-yl)vinyl)benzyl)oxy)-9-oxo-5,6,7,9-tetrahydrobenzo[*a*]heptalen-7-yl)acetamide (compound **8a**). Derivative **4b** 60 mg (0.12 mmol) was dissolved in a 1 mL DMF and 2-vinylpyridine 25 mg (0.24 mmol) was added. Then 1.42 mg (0.006 mmol) of Pd(OCOCH<sub>3</sub>)<sub>2</sub> and 49.7 mg (0.36 mmol) of K<sub>2</sub>CO<sub>3</sub> was added. The solution was stirred at 90 °C for a 4h after this time, the reaction mixture was extracted in the solvent system EtOAc:H<sub>2</sub>O. The organic layer was evaporated and the synthesized derivative **8a** was purified by column chromatography with silica gel with dichloromethane/acetone (from 4:1 to 1:1) as an eluent. The product was obtained as a cream-colored powder. (23.4 mg, 39%), HPLC Rt = 14.338, Anal. Calcd C<sub>40</sub>H<sub>37</sub>NO<sub>6</sub>: C, 76.53; H, 5.94; N, 2.23. Found C, 76.52; H, 5.96; N, 2.24; HRMS (ESI-TOF) m/z: [M + Na]<sup>+</sup> Calcd for C<sub>40</sub>H<sub>37</sub>NNaO<sub>6</sub><sup>+</sup> 650.2519; Found 650.2517. <sup>1</sup>H NMR (500 MHz, CDCl<sub>3</sub>, T = 298 K) δ 7.85 (d, <sup>4</sup>J<sub>H28, H36</sub> = 2.0 Hz, 1H, H-36), 7.83 (m, 1H, H-31), 7.82 (d, <sup>3</sup>J<sub>H28, H29</sub> = 8.8 Hz, 1H, H-29), 7.80 (m, 1H, H-34), 7.73 (dd, <sup>3</sup>J<sub>H28, H29</sub> = 8.6 Hz, <sup>4</sup>J<sub>H28, H36</sub> = 1.7 Hz, 1H, H-28), 7.57 (s, 1H, H-8), 7.57 (d, <sup>3</sup>J<sub>H20, H21 and H23, H24</sub> = 8.3 Hz, 2H, H-21 + H-23), 7.52 (d, <sup>3</sup>J<sub>H7, NH</sub> = 6.8 Hz, 1H, 7-NH), 7.47 (m, 1H, H-32), 7.45 (m, 3H, H-20 + H-24 + H-33), 7.28 (d, <sup>3</sup>J<sub>H25, H26</sub> = 16.3 Hz, 1H, H-26), 7.23 (d, <sup>3</sup>J<sub>H11, H12</sub> = 10.8 Hz, 1H, H-12), 7.21 (d, <sup>3</sup>J<sub>H25, H26</sub> = 16.3 Hz, 1H, H-25), 6.91 (d, <sup>3</sup>J<sub>H11, H12</sub> = 10.9 Hz, 1H, H-11), 6.51 (s, 1H, H-4), 5.37 (d, <sup>2</sup>J = 13.0 Hz, 1H, H-18a), 5.29 (d, <sup>2</sup>J = 13.0 Hz, 1H, H-18b), 4.65 (dt, <sup>3</sup>J<sub>H6b, H7</sub> = 13.0 Hz, <sup>3</sup>J<sub>H6a, H7</sub> = 6.6 Hz, <sup>3</sup>J<sub>H7, NH</sub> = 6.6 Hz, 1H, H-7), 3.92 (s, 3H, H-16), 3.87 (s, 3H, H-17), 3.63 (s, 3H, H-15), 2.50 (dd, <sup>2</sup>J = 13.3 Hz, <sup>3</sup>J<sub>H5b, H6a</sub> = 6.0 Hz, 1H, H-5b), 2.38 (td, <sup>2</sup>J = 13.1 Hz, <sup>3</sup>J<sub>H5a, H6a</sub> = 13.1 Hz, <sup>3</sup>J<sub>H5a, H6b</sub> = 6.6 Hz, 1H, H-5a), 2.29 (tt, <sup>2</sup>J = 12.8 Hz, <sup>3</sup>J<sub>H5a, H6a</sub> = 12.8 Hz, <sup>3</sup>J<sub>H5b, H6a</sub> = 6.3 Hz, <sup>3</sup>J<sub>H6a, H7</sub> = 6.3 Hz, 1H, H-6a), 2.00 (s, 3H, H-14), 1.89 (td, <sup>2</sup>J = 11.7 Hz, <sup>3</sup>J<sub>H6a, H7</sub> = 11.7 Hz, <sup>3</sup>J<sub>H5b, H6a</sub> = 5.9 Hz, 1H, H-6b), <sup>13</sup>C NMR (126 MHz, CDCl<sub>3</sub>, T = 298 K) δ 179.8 (C-9), 170.1 (C-13), 163.1 (C-10), 153.6 (C-3), 151.9 (C-7a), 151.3 (C-1), 141.8 (C-2), 137.6 (C-22), 137.2 (C-12a), 135.3 (C-19), 134.8 (C-12), 134.3 (C-4a), 134.7 (C-27), 133.8 (C-30), 133.2 (C-35), 131.1 (C-8), 129.4 (C-26), 128.5 (C-25 + C-29), 128.1 (C-34), 127.8 (C-31), 127.7 (C-20 + C-24), 127.0 (C-21 + C-23), 129.9 (C-36), 126.5 (C-32), 126.1 (C-33), 125.7 (C-1a), 123.6 (C-28), 115.1 (C-11), 107.5 (C-4), 71.0 (C-18), 61.7 (C-15), 61.5 (C-16), 56.2 (C-17), 52.6 (C-7), 36.7 (C-6), 30.0 (C-5), 23.1(C-14).

(*S,E*)-*N*-(1,2,3-trimethoxy-9-oxo-10-((4-(2-(pyridin-2-yl)vinyl)benzyl)oxy)-5,6,7,9-tetrahydrobenzo[*a*]heptalen-7-yl)acetamide (compound **8b**). Derivative **4b** 60 mg (0.12 mmol) was dissolved in a 1 mL DMF and 2-vinylpyridine 25 mg (0.24 mmol) was added. Then 1.42 mg (0.006 mmol) of Pd(OCOCH<sub>3</sub>)<sub>2</sub> and 49.7 mg (0.36 mmol) of K<sub>2</sub>CO<sub>3</sub> was added. The solution was stirred at 90 °C for a 4h after this time, the reaction mixture was extracted in the solvent system EtOAc:H<sub>2</sub>O. The organic layer was evaporated and the synthesized derivative **8b** was purified by column chromatography with silica gel with dichloromethane/acetone (from 4:1 to 1:1) as an eluent. The product was obtained as a cream-colored powder. (19.5 mg, 35%), HPLC Rt = 8.931, Anal. Calcd C<sub>35</sub>H<sub>34</sub>N<sub>2</sub>O<sub>6</sub>: C, 72.65; H,

5.92; N, 4.84. Found C, 72.68; H, 5.92; N, 4.80; HRMS (ESI-TOF)  $m/z$ :  $[M + H]^+$  Calcd for  $C_{35}H_{35}N_2O_6^+$  579.2490; Found 579.2488.  $^1H$  NMR (500 MHz,  $CDCl_3$ , T = 298 K)  $\delta$  8.58 (ddd,  $^3J_{H30,H31} = 4.8$  Hz,  $^4J_{H29,H31} = 1.8$  Hz,  $^4J_{H28,H31} = 0.9$  Hz, 1H, H-31), 7.90 (d,  $^3J_{H7,NH} = 6.5$  Hz, 1H, 7-NH), 7.64 (dt,  $^3J_{H28,H29} = 7.5$  Hz,  $^3J_{H29,H30} = 7.5$  Hz,  $^4J_{H29,H31} = 1.8$  Hz, 1H, H-29), 7.61 (d,  $^3J_{H25,H26} = 16.0$  Hz, 1H, H-26), 7.59 (s, 1H, H-8), 7.58 (d,  $^3J_{H20,H21}$  and  $H23,H24} = 8.4$  Hz, 2H, H-21 + H-23), 7.43 (d,  $^3J_{H20,H21}$  and  $H23,H24} = 8.4$  Hz, 2H, H-20 + H-24), 7.36 (dt,  $^3J_{H28,H29} = 8.0$  Hz,  $^3J_{H28,H30} = 1.1$  Hz,  $^4J_{H28,H31} = 1.1$  Hz 1H, H-28), 7.21 (d,  $^3J_{H11,H12} = 10.7$  Hz, 1H, H-12), 7.16 (d,  $^3J_{H25,H26} = 16.1$  Hz, 1H, H-25), 7.13 (ddd,  $^3J_{H29,H30} = 7.5$  Hz,  $^3J_{H30,H31} = 4.8$  Hz,  $^4J_{H28,H30} = 1.2$  Hz, 1H, H-30), 6.90 (d,  $^3J_{H11,H12} = 10.9$  Hz, 1H, H-11), 6.50 (s, 1H, H-4), 5.36 (d,  $^2J = 13.1$  Hz, 1H, H-18a), 5.28 (d,  $^2J = 13.0$  Hz, 1H, H-18b), 4.63 (dt,  $^3J_{H6b,H7} = 12.2$  Hz,  $^3J_{H6a,H7} = 6.4$  Hz,  $^3J_{H7,NH} = 6.4$  Hz, 1H, H-7), 3.90 (s, 3H, H-16), 3.86 (s, 3H, H-17), 3.61 (s, 3H, H-15), 2.48 (dd,  $^2J = 13.3$  Hz,  $^3J_{H5b,H6a} = 6.5$  Hz, 1H, H-5b), 2.36 (td,  $^2J = 12.9$  Hz,  $^3J_{H5a,H6a} = 12.9$  Hz,  $^3J_{H5a,H6b} = 6.3$  Hz, 1H, H-5a), 2.28 (tt,  $^2J = 12.7$  Hz,  $^3J_{H5a,H6a} = 12.7$  Hz,  $^3J_{H5b,H6a} = 6.1$  Hz,  $^3J_{H6a,H7} = 6.1$  Hz, 1H, H-6a), 1.98 (s, 3H, H-14), 1.90 (td,  $^2J = 11.7$  Hz,  $^3J_{H6a,H7} = 11.7$  Hz,  $^3J_{H5b,H6a} = 5.7$  Hz, 1H, H-6b),  $^{13}C$  NMR (126 MHz,  $CDCl_3$ , T = 298 K)  $\delta$  179.7 (C-9), 170.1 (C-13), 163.0 (C-10), 155.5 (C-27), 153.6 (C-3), 152.1 (C-7a), 151.2 (C-1), 149.8 (C-31), 141.7 (C-2), 137.3 (C-12a), 136.8 (C-22), 136.7 (C-29), 135.4 (C-19), 135.3 (C-12), 134.3 (C-4a), 132.1 (C-26), 131.8 (C-8), 128.5 (C-25), 127.6 (C-20 + C-21 + C-23 + C-24), 125.7 (C-1a), 122.3 (C28 + C-30), 115.1 (C-11), 107.4 (C-4), 70.9 (C-18), 61.6 (C-15), 61.5 (C-16), 56.2 (C-17), 52.6 (C-7), 36.5 (C-6), 30.0 (C-5), 22.9 (C-14).

(*S,E*)-*N*-(1,2,3-trimethoxy-9-oxo-10-((4-(2-(quinolin-3-yl)vinyl)benzyl)oxy)-5,6,7,9-tetrahydrobenzo[*a*]heptalen-7-yl)acetamide (compound **8c**). Derivative **4j** 50 mg (0.1 mmol) was dissolved in a 1 mL DMF and 3-bromoquinoline 41.6 mg (0.2 mmol) was added. Then 1.18 mg (0.005 mmol) of  $Pd(OCOCH_3)_2$  and 41.4 mg (0.3 mmol) of  $K_2CO_3$  was added. The solution was stirred at 90 °C for a 24 h after this time, the reaction mixture was extracted in the solvent system EtOAc:H<sub>2</sub>O. The organic layer was evaporated and the synthesized derivative **8c** was purified by column chromatography with silica gel with dichloromethane/acetone (from 4:1 to 1:1) as an eluent. The product was obtained as a cream-colored powder. (20.6 mg, 33%), HPLC Rt = 10.925, Anal. Calcd  $C_{39}H_{36}N_2O_6$ : C, 74.50; H, 5.77; N, 4.46; N, 2.33. Found C, 74.52; H, 5.74; N, 4.47; HRMS (ESI-TOF)  $m/z$ :  $[M + H]^+$  Calcd for  $C_{39}H_{37}N_2O_6^+$  629.2646; Found 629.2643.  $^1H$  NMR (500 MHz,  $CDCl_3$ , T = 298 K)  $\delta$  9.11 (d,  $^4J_{H28,H35} = 2.3$  Hz, 1H, H-35), 8.17 (d,  $^4J_{H28,H35} = 2.5$  Hz, 1H, H-28), 8.08 (d,  $^3J_{H32,H33} = 8.4$  Hz, 1H, H-33), 7.65 (ddd,  $^3J_{H32,H33} = 8.4$  Hz,  $^3J_{H31,H32} = 6.9$  Hz,  $^4J_{H30,H32} = 1.5$  Hz, 1H, H-32), 7.59 (d,  $^3J_{H20,H21}$  and  $H23,H24} = 8.3$  Hz, 2H, H-21 + H-23), 7.54 (s, 1H, H-8), 7.47 (d,  $^3J_{H20,H21}$  and  $H23,H24} = 8.3$  Hz, 2H, H-20 + H-24), 7.33 (d,  $^3J_{H7,NH} = 6.0$  Hz, 1H, 7-NH), 7.32 (d,  $^3J_{H25,H26} = 16.4$  Hz, 1H, H-25), 7.24 (d,  $^3J_{H25,H26} = 16.5$  Hz, 1H, H-26), 7.22 (d,  $^3J_{H11,H12} = 10.8$  Hz, 1H, H-12), 6.90 (d,  $^3J_{H11,H12} = 11.0$  Hz, 1H, H-11), 6.51 (s, 1H, H-4), 5.37 (d,  $^2J = 13.0$  Hz, 1H, H-18a), 5.30 (d,  $^2J = 13.0$  Hz, 1H, H-18b), 4.64 (dt,  $^3J_{H6b,H7} = 13.0$  Hz,  $^3J_{H6a,H7} = 6.6$  Hz,  $^3J_{H7,NH} = 6.6$  Hz, 1H, H-7), 3.91 (s, 3H, H-16), 3.88 (s, 3H, H-17), 3.63 (s, 3H, H-15), 2.48 (dd,  $^2J = 13.4$  Hz,  $^3J_{H5b,H6a} = 6.3$  Hz, 1H, H-5b), 2.39 (td,  $^2J = 13.2$  Hz,  $^3J_{H5a,H6a} = 13.2$  Hz,  $^3J_{H5a,H6b} = 6.3$  Hz, 1H, H-5a), 2.27 (tt,  $^2J = 13.2$  Hz,  $^3J_{H5a,H6a} = 13.2$  Hz,  $^3J_{H5b,H6a} = 6.5$  Hz,  $^3J_{H6a,H7} = 6.5$  Hz, 1H, H-6a), 1.99 (s, 3H, H-14), 1.87 (m, 1H, H-6b),  $^{13}C$  NMR (126 MHz,  $CDCl_3$ , T = 298 K)  $\delta$  179.8 (C-9), 170.0 (C-13), 163.1 (C-10), 153.8 (C-3), 151.7 (C-7a),

151.3 (C-1), 149.5 (C-35), 147.6 (C-34), 141.8 (C-2), 137.2 (C-12a), 137.0 (C-22), 135.4 (C-19), 135.2 (C-12), 134.3 (C-4a), 132.6 (C28), 131.2 (C-8), 130.4 (C-25), 130.3 (C-29), 129.4 (C-32), 129.3 (C-33), 128.2 (C-27), 128.0 (C-30), 127.8 (C-20 + C-24), 127.2 (C-21 + C-23 + C-31), 125.9 (C-26), 125.7 (C-1a), 115.0 (C-11), 107.5 (C-4), 70.9 (C-18), 61.7 (C-15), 61.5 (C-16), 56.2 (C-17), 52.5 (C-7), 36.8 (C-6), 30.0 (C-5), 23.1 (C-14).

(4*E*,6*Z*,8*S*,9*S*,10*E*,12*S*,13*R*,14*S*,16*R*)-19-((4-((*E*)-4-(((*S*)-7-acetamido-1,2,3-trimethoxy-9-oxo-5,6,7,9-tetrahydrobenzo[*a*]heptalen-10-yl)oxy)methyl)styryl)benzyl)amino)-13-hydroxy-8,14-dimethoxy-4,10,12,16-tetramethyl-3,20,22-trioxo-2-azabicyclo[16.3.1]docosa-1(21),4,6,10,18-pentaen-9-yl carbamate (compound **8d**). Derivative **4j** 50 mg (0.1 mmol) was dissolved in a 0.5 mL DMF and **10** 50 mg (0.07 mmol) was added. Then 1.2 mg (0.005 mmol) of Pd(OCOCH<sub>3</sub>)<sub>2</sub> and 50  $\mu$ L of TEA was added. The solution was stirred at room temperature for a week and after this time, ethyl acetate was added and extracted twice with 25 mL of water. The organic layer was evaporated and the synthesized derivative **8d** was purified by column chromatography with silica gel with dichloromethane/methanol (60:1) as an eluent. The product was obtained as a violet powder. (19 mg, 25%), HPLC  $R_t$  = 9.128 min. Anal. Calcd for C<sub>65</sub>H<sub>74</sub>N<sub>4</sub>O<sub>14</sub>: C, 68.77; H, 6.57; N, 4.93. Found: C, 68.76; H, 6.55; N, 4.91; HRMS (ESI-TOF)  $m/z$ : [M + H]<sup>+</sup> Calcd 1134.5202; Found 1134.5200. FT-IR (KBr):  $\nu$ (N-H)\*<sub>amide, substituent</sub>,  $\nu$ (O-H)\* - 3474 cm<sup>-1</sup>;  $\nu_s$ (N-H)<sub>lactam</sub> - 3324cm<sup>-1</sup>;  $\nu$ (N-H)\*<sub>amide</sub>,  $\nu$ (O-H), $\nu$ (=CH)\* - 3197 cm<sup>-1</sup>;  $\nu$ (C-H) - 2931 cm<sup>-1</sup>;  $\nu$ (C=O)<sub>carbamate</sub> - 1722 cm<sup>-1</sup>;  $\nu$ (C=O)\*<sub>lactam, amide</sub> - 1689 cm<sup>-1</sup>;  $\nu$ (C=O)<sub>quinone</sub> - 1651 cm<sup>-1</sup>;  $\nu$ (C=C) - 1613 cm<sup>-1</sup>;  $\delta$ (N-H)\*<sub>lactam,amide</sub> - 1573 cm<sup>-1</sup>;  $\delta$ (N-H)<sub>carbamate</sub> - 1486 cm<sup>-1</sup>;  $\nu$ (C-N)<sub>carbamate</sub> - 1322 cm<sup>-1</sup>;  $\nu$ (C-O)<sub>as</sub> - 1236 cm<sup>-1</sup>;  $\nu$ (C-O-C)<sub>carbamate</sub> - 1194 cm<sup>-1</sup>;  $\nu$ (C-O)<sub>s</sub> - 1139, 1095 cm<sup>-1</sup>,  $\nu$ (C-O)<sub>methoxy</sub> - 1049 cm<sup>-1</sup>. <sup>1</sup>H NMR (500 MHz, CDCl<sub>3</sub>, 25°C)  $\delta$  9.12 (s, 1H, NH-1'), 7.50 – 7.48 (m, 2H, H-20,24), 7.48 – 7.46 (m, 4H, H-31',32',34',35'), 7.41 – 7.37 (m, 2H, H-8,26), 7.23 – 7.20 (m, 3H, H-12,21,23), 7.16 (d, <sup>3</sup> $J_{H11,H12}$  = 10.7 Hz, 1H, H-11), 7.06 (s, 2H, H-25,19'), 7.04 – 7.00 (m, 1H, NH-7), 6.92 (d, <sup>3</sup> $J_{H3',H4'}$  = 11.5 Hz, 1H, H-3'), 6.54 (t, <sup>3</sup> $J_{H3',H4'}$  = 11.3 Hz, 1H, H-4'), 6.46 (s, 1H, H-4), 6.42 (t, <sup>3</sup> $J_{NH17',H29'}$  = 5.5 Hz, 1H, NH-17'), 5.85 (t, <sup>3</sup> $J_{H5',H6'}$  = 9.2 Hz, 1H, H-5'), 5.81 (d, <sup>3</sup> $J_{H9',H10'}$  = 10.6 Hz, 1H, H-9'), 5.30 (d, <sup>2</sup> $J$  = 13.0 Hz, 1H, H-18), 5.23 (d, <sup>2</sup> $J$  = 13.4 Hz, 1H, H-18), 5.14 (s, 1H, H-7'), 4.87 (vbs, 2H, NH<sub>2</sub>-24'), 4.74 – 4.68 (m, 1H, H-29'), 4.62 – 4.55 (m, 2H, H-7, 29'), 4.29 – 4.25 (m, 1H, H-6'), 4.13 (s, 1H, OH-11'), 3.87 (s, 3H, H-16), 3.83 (s, 3H, H-17), 3.57 (s, 3H, H-15), 3.55 – 3.52 (m, 1H, H-11'), 3.42 – 3.37 (m, 1H, H-12'), 3.32 (s, 3H, H-27'), 3.23 (s, 3H, H-23'), 2.74 – 2.66 (m, 1H, H-10'), 2.62 (d, <sup>2</sup> $J$  = 13.9 Hz, 1H, H-15'), 2.45 (dt, <sup>2</sup> $J$  = 12.0 Hz, <sup>3</sup> $J_{H5b,H6a}$  = 6.0 Hz, 1H, H-5b), 2.41 – 2.37 (m, 1H, H-15'), 2.33 (<sup>2</sup> $J$  = 13.2 Hz, <sup>3</sup> $J_{H5a,H6a}$  = 13.2 Hz, <sup>3</sup> $J_{H5a,H6b}$  = 6.5 Hz, 1H, H-5a), 2.21 (dt, <sup>2</sup> $J$  = 12.9 Hz, <sup>3</sup> $J_{H5a,H6a}$  = 12.9 Hz, <sup>3</sup> $J_{H5b,H6a}$  = 6.3 Hz, <sup>3</sup> $J_{H6a,H7}$  = 6.3 Hz, 1H, H-6a), 1.98 (s, 3H, H-22'), 1.95 (s, 3H, H-14), 1.85 – 1.78 (m, 1H, H-6b), 1.76 (d, <sup>4</sup> $J_{H10',H25'}$  = 1.3 Hz, 3H, H-25'), 1.74 – 1.72 (m, 1H, H-14'), 1.70 (bs, 2H, H-13'), 0.99 (d, <sup>3</sup> $J_{H10,H26}$  = 6.1 Hz, 3H, H-26'), 0.95 (d, <sup>3</sup> $J_{H14,H28}$  = 6.9 Hz, 3H, H-28'). <sup>13</sup>C NMR (126 MHz, CDCl<sub>3</sub>, 25°C)  $\delta$  183.9 (C-18'), 181.2 (C-21'), 179.8 (C-9), 169.9 (C-13), 168.5 (C-1'), 163.1 (C-10), 156.2 (C-24'), 153.6 (C-3), 151.6 (C-7a), 151.3 (C-1), 144.8 (C-17'), 141.4 (C-2), 141.4 (C-20'), 137.6 (C-12a), 137.3 (C-22), 137.1 (C-33'), 136.1 (C-5'), 136.0 (C-30'), 135.2\* (C-12, 2'), 135.0 (C-19), 134.3 (C-4a), 133.8 (C-9'), 133.0 (C-8'), 131.2 (C-8), 129.0 (C-26), 128.4 (C-25), 128.3\* (C-31',35'), 127.7\* (C-20,24), 127.4\* (C-32',34'), 127.1 (C-3'), 127.1 (C-21,23), 126.7 (C-4'), 125.7 (C-1a), 115.0 (C-11),

109.2 (C-16'), 109.0 (C-19'), 107.5 (C-4), 81.8 (C-7'), 81.6 (C-6'), 81.4 (C-12'), 72.8 (C-11'), 70.9 (C-18), 61.7 (C-15), 61.5 (C-16), 57.3 (C-23'), 56.9 (C-27'), 56.2 (C-17), 52.4 (C-7), 50.0 (C-29'), 36.9 (C-6), 35.2 (C-13'), 34.6 (C-15'), 32.4 (C-10'), 30.0 (C-5), 28.6 (C-14'), 23.1 (C-28'), 23.1 (C-14), 12.9 (C-25'), 12.7 (C-22'), 12.5 (C-26'). (\*-overlapped)

(4*E*,6*Z*,8*S*,9*S*,10*E*,12*S*,13*R*,14*S*,16*R*)-19-((2-azidoethyl)amino)-13-hydroxy-8,14-dimethoxy-4,10,12,16-tetramethyl-3,20,22-trioxo-2-azabicyclo[16.3.1]docosa-1(21),4,6,10,18-pentaen-9-yl carbamate (compound **9**). First, 200 mg (0.36 mmol) of geldanamycin was dissolved in a 4.4 mL mixture of THF/MeOH (10:1) and then a four-fold excess of 2-azidoethanamine was added (1.44 mmol). Then, to the each mixture, 0.7 ml of TEA was added. The mixtures were stirred at 60 °C for a 8h and after that the solvent was evaporated. After the reaction, solvent was evaporated. All of these products were purified by column chromatography on silica gel with methylene chloride/acetone as an eluent. After evaporation of the solvent, product was obtained as a violet powder, (274 mg, 98%). HPLC  $R_t$  = 6.549 min. Anal. Calcd for  $C_{30}H_{42}N_6O_8$ : C, 58.62; H, 6.89; N, 13.67. Found: C, 58.63; H, 6.90; N, 13.65; HRMS (ESI-TOF)  $m/z$ :  $[M + H]^+$  Calcd 614.3064; Found 614.3067. FT-IR (KBr):  $\nu_{as}(N-H)_{carbamate}$  = 3446.02  $cm^{-1}$ ,  $\nu_s(N-H)_{carbamate}$  = 3420.24  $cm^{-1}$ ,  $\nu_s(N-H)_{lactam}$  = 3321.45  $cm^{-1}$ ,  $\nu(O-H)$  = 3200.36  $cm^{-1}$ ,  $\nu_s(C-H)$  = 2931.03  $cm^{-1}$ ,  $\nu(N_3)$  = 2102.72  $cm^{-1}$ ,  $\nu(C=O)_{carbamate}$  = 1727.88  $cm^{-1}$ ,  $\nu(C=O)_{lactam}$  = 1691.24  $cm^{-1}$ ,  $\nu(C=O)_{quinone}$  = 1650.69  $cm^{-1}$ ,  $\nu(C=C)$  = 1616.24  $cm^{-1}$ ,  $\delta(N-H)^*_{lactam,substituent}$  = 1581.51  $cm^{-1}$ ,  $\delta(N-H)_{carbamate}$  = 1489.14  $cm^{-1}$ ,  $\nu(C-N)_{carbamate}$  = 1323.27  $cm^{-1}$ ,  $\nu(C-O-C)_{carbamate}$  = 1190.92  $cm^{-1}$ ,  $\nu(C-O-C)_{substituent}$  = 1102.09  $cm^{-1}$ ,  $\nu(C-O-C)_{methoxy}$  = 1056.87  $cm^{-1}$ ,  $\gamma(=C-H)_{carbamate}$  = 784.50  $cm^{-1}$ ,  $\gamma(N-H)_{carbamate}$  = 700.51  $cm^{-1}$ .  $^1H$  NMR (500 MHz,  $CDCl_3$ , 25°C)  $\delta$  9.10 (s, 1H, NH-1), 7.29 (s, 1H, H-19), 6.94 (d,  $^3J_{H_3,H_4}$  = 11.7 Hz, 1H, H-3), 6.61 – 6.54 (m, 1H, H-4), 6.32 (t,  $^3J_{H_{29},NH_{17}}$  = 5.8 Hz, 1H, NH-17), 5.88 (s, 1H, H-9), 5.86 (t,  $^3J_{H_5,H_6}$  = 10.6 Hz, 1H, H-5), 5.18 (s, 1H, H-7), 4.88 (s, 2H, NH<sub>2</sub>-24), 4.33 – 4.28 (m, 1H, H-6), 3.76 – 3.64 (m, 2H, H-29), 3.64 – 3.59 (m, 2H, H-30), 3.58 – 3.55 (m, 1H, H-11), 3.46 – 3.41 (m, 1H, H-12), 3.35 (s, 3H, H-27), 3.26 (s, 3H, H-23), 2.92 – 2.85 (m, 1H, OH-11), 2.77 – 2.72 (m, 1H, H-10), 2.73 – 2.67 (m, 1H, H-15), 2.29 (dd,  $^2J$  = 14.1 Hz,  $^3J_{H_{14},H_{15}}$  = 10.5 Hz, 1H, H-15), 2.02 (d,  $^4J_{H_3,H_{22}}$  = 1.3 Hz, 3H, H-22), 1.82 – 1.76 (m, 5H, H-13,25), 1.76 – 1.67 (m, 1H, H-14), 0.99 (d,  $^3J_{H_{10},H_{26}}$  = 7.4 Hz, 3H, H-26), 0.97 (d,  $^3J_{H_{14},H_{28}}$  = 6.9 Hz, 3H, H-28).  $^{13}C$  NMR (126 MHz,  $CDCl_3$ , 25°C)  $\delta$  183.9 (C-18), 181.3 (C-21), 168.5 (C-1), 156.2 (C-24), 144.8 (C-17), 141.0 (C-20), 136.0 (C-5), 135.1 (C-2), 133.7 (C-9), 133.0 (C-8), 127.1 (C-3), 126.7 (C-4), 109.8 (C-16), 109.2 (C-19), 81.7 (C-7), 81.5 (C-6), 81.3 (C-12), 72.8 (C-11), 57.3 (C-23), 56.9 (C-27), 50.5 (C-29), 44.6 (C-30), 35.2 (C-13), 34.5 (C-15), 32.5 (C-10), 28.8 (C-14), 23.1 (C-28), 13.0 (C-25), 12.7 (C-22), 12.6 (C-26). (\*-overlapped)

(4*E*,6*Z*,8*S*,9*S*,10*E*,12*S*,13*R*,14*S*,16*R*)-13-hydroxy-19-((4-iodobenzyl)amino)-8,14-dimethoxy-4,10,12,16-tetramethyl-3,20,22-trioxo-2-azabicyclo[16.3.1]docosa-1(21),4,6,10,18-pentaen-9-yl carbamate (compound **10**) First, 50 mg (0.09 mmol) of geldanamycin was dissolved in a 3.3 mL mixture of THF/MeOH (10:1) and then a four-fold excess of (4-iodophenyl)methanamine was added (0.36 mmol). Then, to the each mixture, 0.5 ml of TEA was added. The mixtures were stirred at 60 °C for a 5h and after that the solvent was evaporated. After the reaction, solvent was evaporated. All of these products were purified by column chromatography on silica gel with methylene chloride/acetone as an eluent. After

evaporation of the solvent, product was obtained as a violet powder, (26 mg, 59%). HPLC  $R_t$ = 13.911 min. Anal. Calcd for  $C_{35}H_{44}IN_3O_8$ : C, 55.19; H, 5.82; I, 16.66; N, 5.52. Found: C, 55.20; H, 5.84; I, 16.65; N, 5.51.; HRMS (ESI-TOF)  $m/z$ :  $[M + H]^+$  Calcd 761.2173; Found 761.2176. FT-IR (KBr):  $\nu_{as}(N-H)_{carbamate}=3489.48\text{ cm}^{-1}$ ,  $\nu_s(N-H)_{carbamate}=3433.25\text{ cm}^{-1}$ ,  $\nu_s(N-H)_{lactam}=3323.38\text{ cm}^{-1}$ ,  $\nu(O-H)=3191.22\text{ cm}^{-1}$ ,  $\nu_s(C-H)=2929.43\text{ cm}^{-1}$ ,  $\nu(C=O)_{carbamate}=1733.03\text{ cm}^{-1}$ ,  $\nu(C=O)_{lactam}=1695.73\text{ cm}^{-1}$ ,  $\nu(C=O)_{quinone}=1646.62\text{ cm}^{-1}$ ,  $\nu(C=C)=1615.53\text{ cm}^{-1}$ ,  $\delta(N-H)^*_{lactam,substituent}=1590.95\text{ cm}^{-1}$ ,  $\delta(N-H)_{carbamate}=1485.53\text{ cm}^{-1}$ ,  $\nu(C-N)_{carbamate}=1326.30\text{ cm}^{-1}$ ,  $\nu(C-O-C)_{carbamate}=1190.30\text{ cm}^{-1}$ ,  $\nu(C-O-C)_{substituent}=1100.30\text{ cm}^{-1}$ ,  $\nu(C-O-C)_{methoxy}=1030.23\text{ cm}^{-1}$ ,  $\gamma(C-H)_{carbamate}=786.67\text{ cm}^{-1}$ ,  $\gamma(N-H)_{carbamate}=707.18\text{ cm}^{-1}$ .  $^1H$  NMR (500 MHz,  $CDCl_3$ ,  $25^\circ C$ )  $\delta$  9.13 (s, 1H, NH-1), 7.74 – 7.70 (m, 2H, H-32,34), 7.30 (s, 1H, H-19), 7.04 – 7.00 (m, 2H, H-31,35), 6.95 (d,  $^3J_{H3,H4}=11.7\text{ Hz}$ , 1H, H-3), 6.62 – 6.54 (m, 1H, H-4), 6.41 (t,  $^3J_{H29,NH17}=5.8\text{ Hz}$ , 1H, NH-17), 5.91 – 5.85 (m, 2H, H-5,9), 5.87 – 5.84 (m, 1H, H-5), 5.19 (s, 1H, H-7), 4.84 (s, 2H,  $NH_2$ -24), 4.69 (dd,  $^2J=14.8\text{ Hz}$ ,  $^3J_{H29,NH17}=5.9\text{ Hz}$ , 1H, H-29), 4.58 (dd,  $^2J=14.8\text{ Hz}$ ,  $^3J_{H29,NH17}=5.7\text{ Hz}$ , 1H, H-29), 4.33 – 4.29 (m, 1H, H-6), 4.05 (s, 1H, OH-11), 3.59 – 3.54 (m, 1H, H-11), 3.45 – 3.41 (m, 1H, H-12), 3.36 (s, 3H, H-27), 3.27 (s, 3H, H-23), 2.78 – 2.70 (m, 1H, H-10), 2.67 – 2.61 (m, 1H, H-15), 2.36 (dd,  $^2J=14.1\text{ Hz}$ ,  $J^3_{H15,H14}=10.1\text{ Hz}$ , 1H, H-15), 2.02 (d,  $^4J_{H3,H22}=1.3\text{ Hz}$ , 3H, H-22), 1.79 (d,  $^4J_{H9,H25}=1.4\text{ Hz}$ , 3H, H-25), 1.77 – 1.73 (m, 2H, H-13), 1.65 (s, 1H, H-14), 1.00 (d,  $^3J_{H10,H26}=7.4\text{ Hz}$ , 3H, H-26), 0.99 (d,  $^3J_{H14,H28}=6.9\text{ Hz}$ , 3H, H-28).  $^{13}C$  NMR (126 MHz,  $CDCl_3$ ,  $25^\circ C$ )  $\delta$  183.9 (C-18), 181.4 (C-21), 168.5 (C-1), 156.2 (C-24), 144.7 (C-17), 141.3 (C-20), 138.4\* (C-32,34), 136.5 (C-30), 136.1 (C-5), 135.1 (C-2), 133.8 (C-9), 133.0 (C-8), 129.6\* (C-31,35), 127.1 (C-3), 126.7 (C-4), 109.5 (C-16), 109.0 (C-19), 94.1 (C-33), 81.8 (C-7), 81.5 (C-6), 81.3 (C-12), 72.8 (C-11), 57.3 (C-23), 56.9 (C-27), 49.6 (C-29), 35.1 (C-13), 34.6 (C-15), 32.5 (C-10), 28.7 (C-14), 23.1 (C-28), 12.9 (C-25), 12.7 (C-22), 12.5 (C-26). (\*-overlapped)

## FT-IR spectra

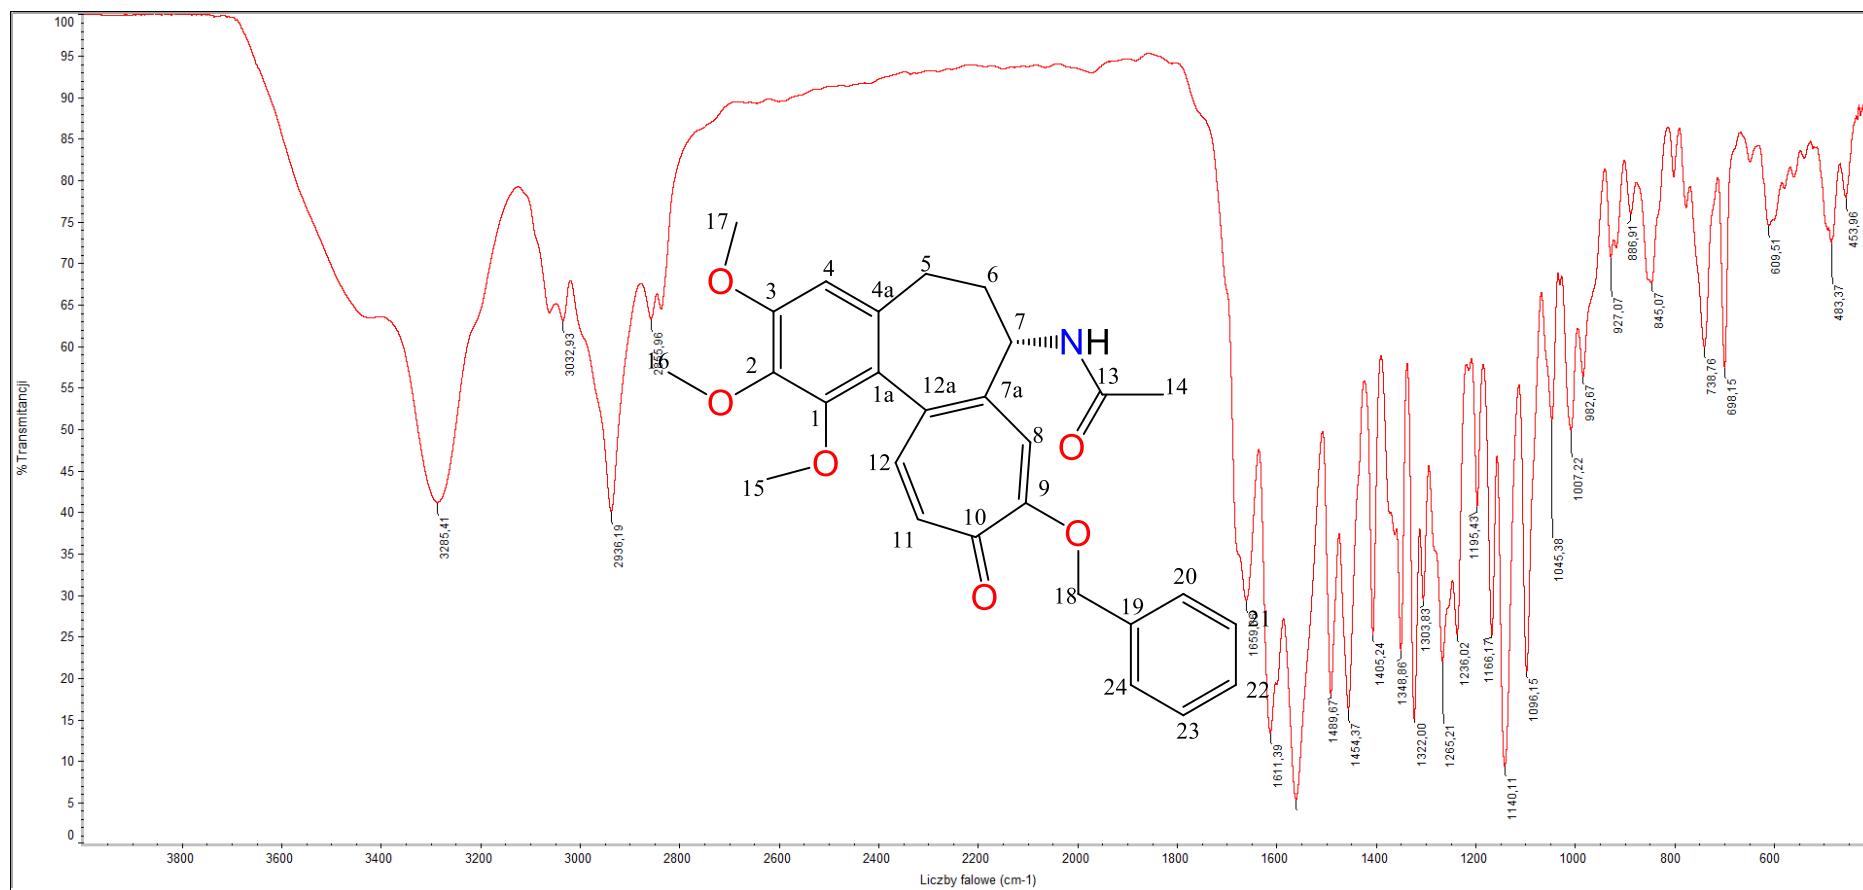

**Figure 8S.** FT-IR spectrum of compound **3a** (in KBr).

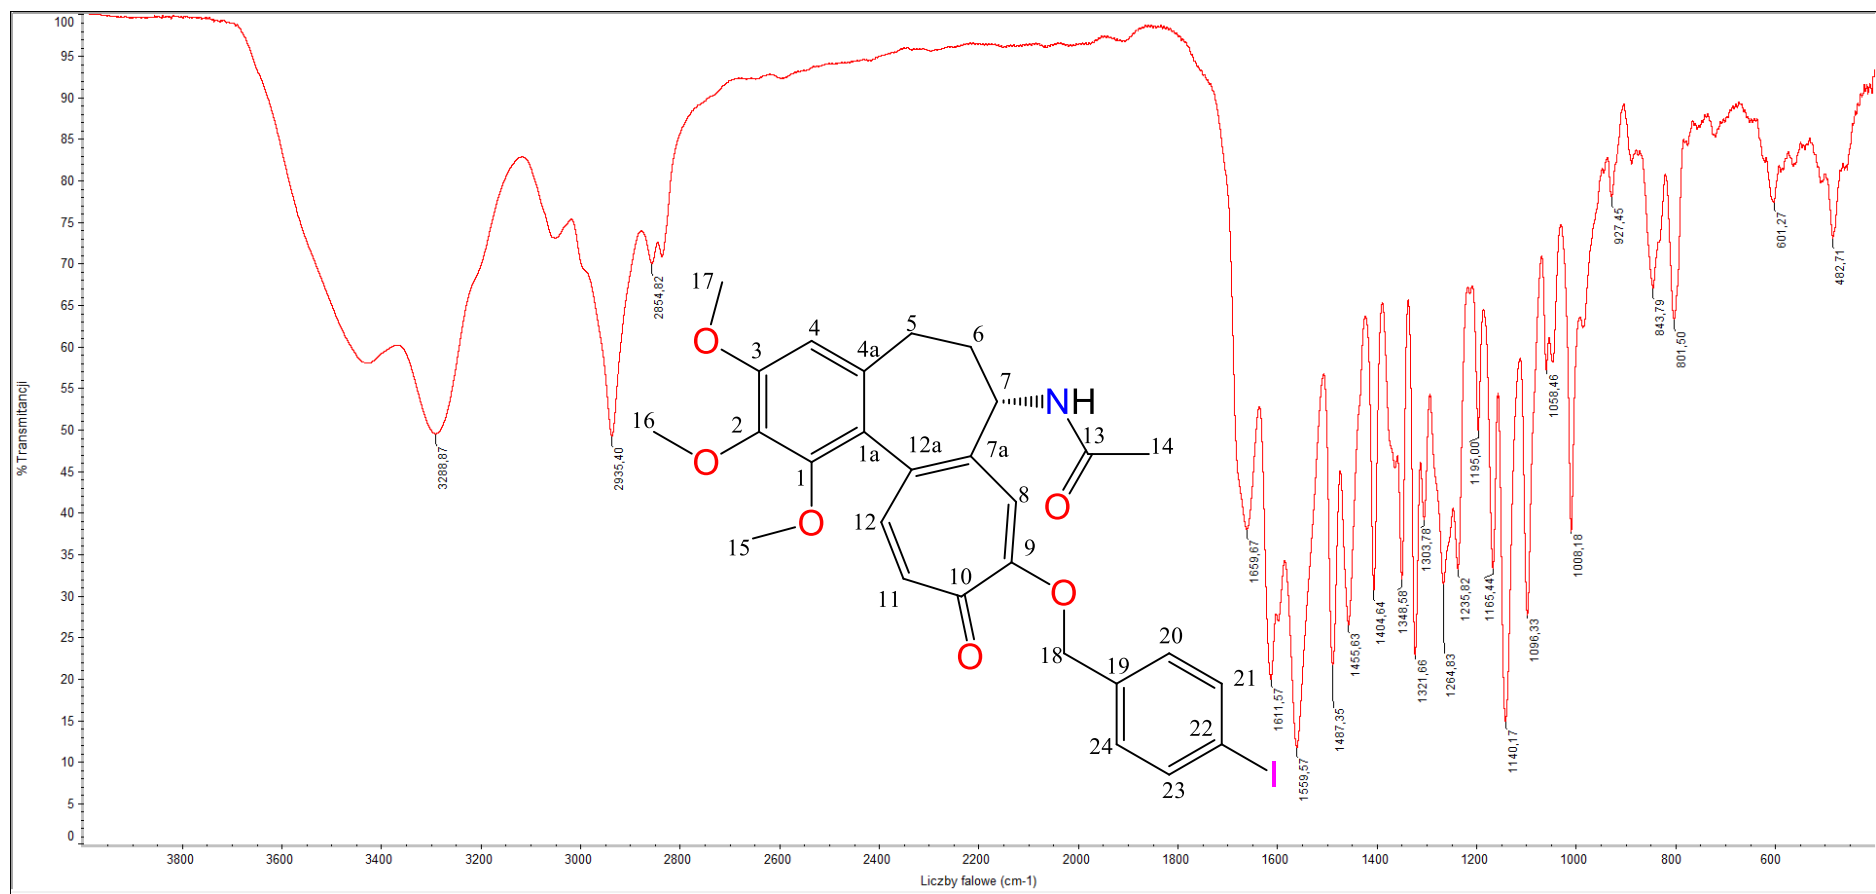

**Figure 9S.** FT-IR spectrum of compound **3b** (in KBr).

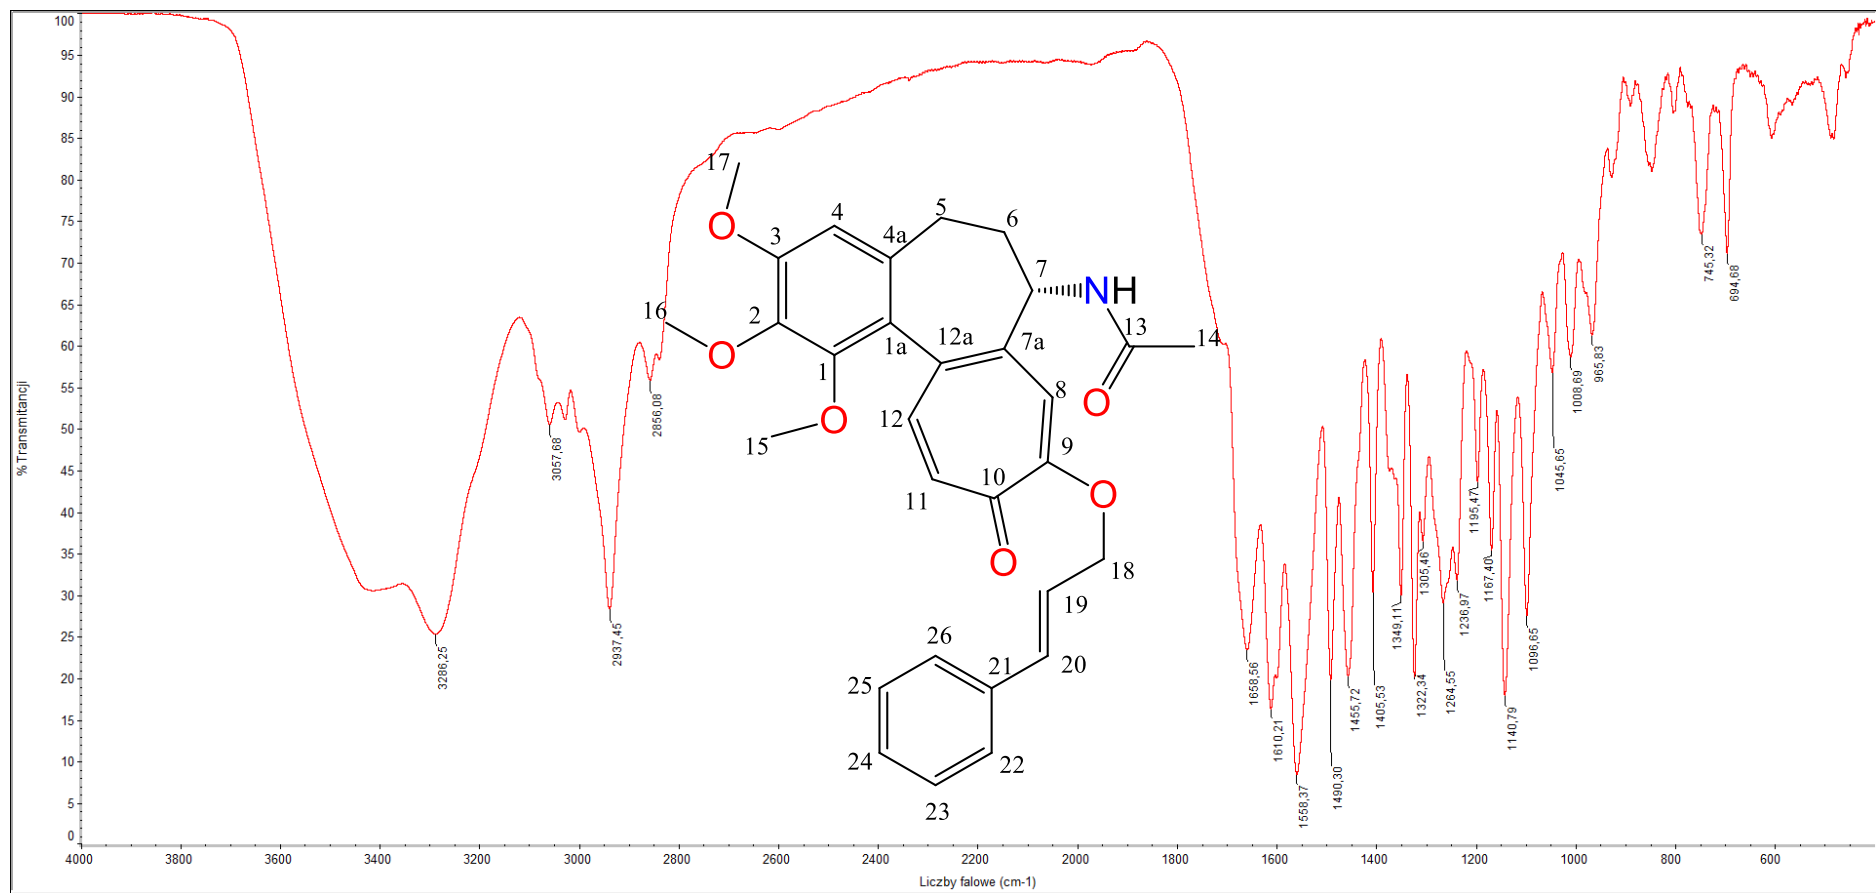

**Figure 10S.** FT-IR spectrum of compound 3c (in KBr).



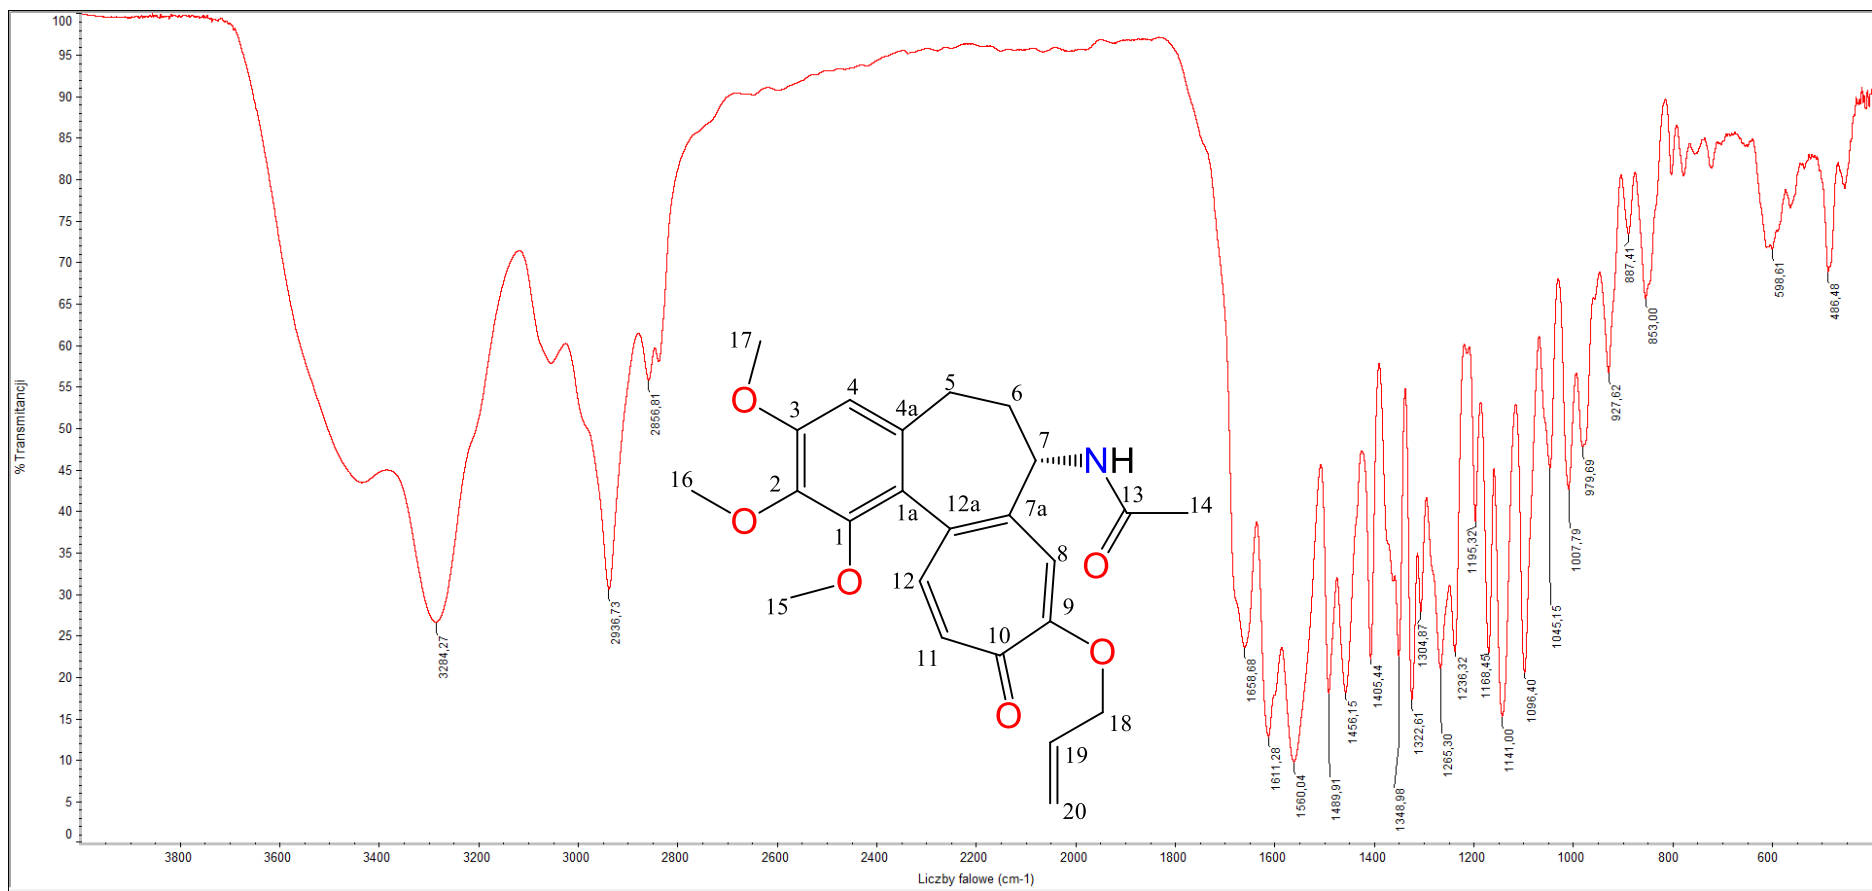

**Figure 11S.** FT-IR spectrum of compound **3d** (in KBr).

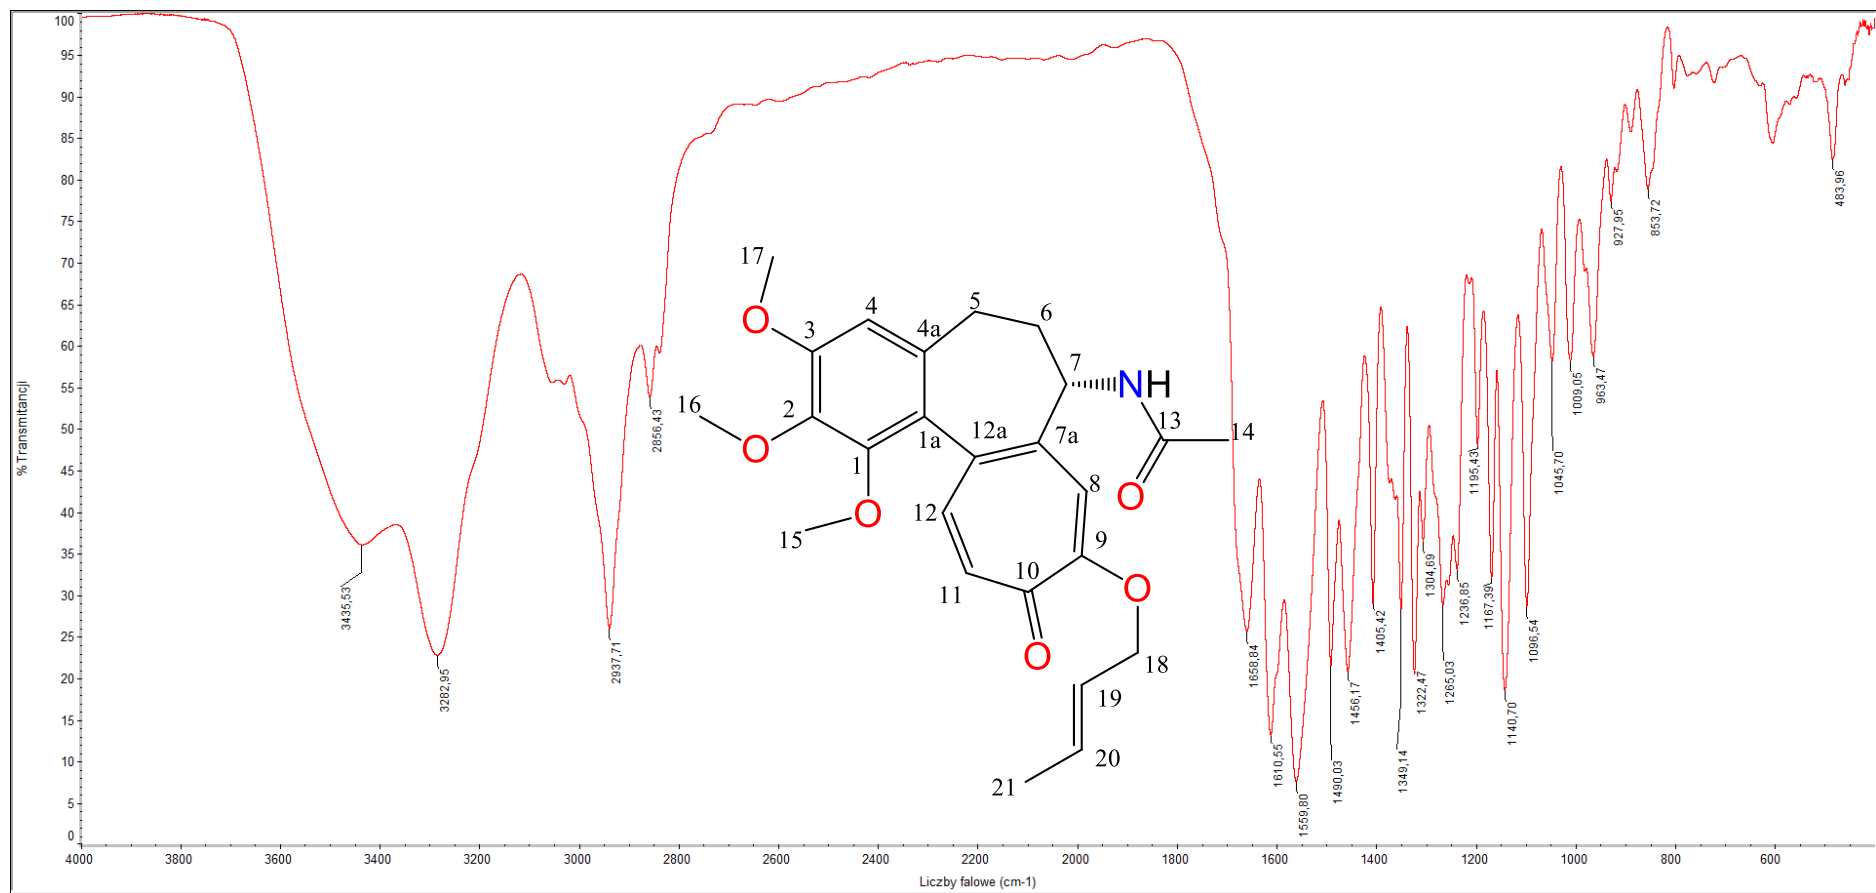

**Figure 12S.** FT-IR spectrum of compound **3e** (in KBr).

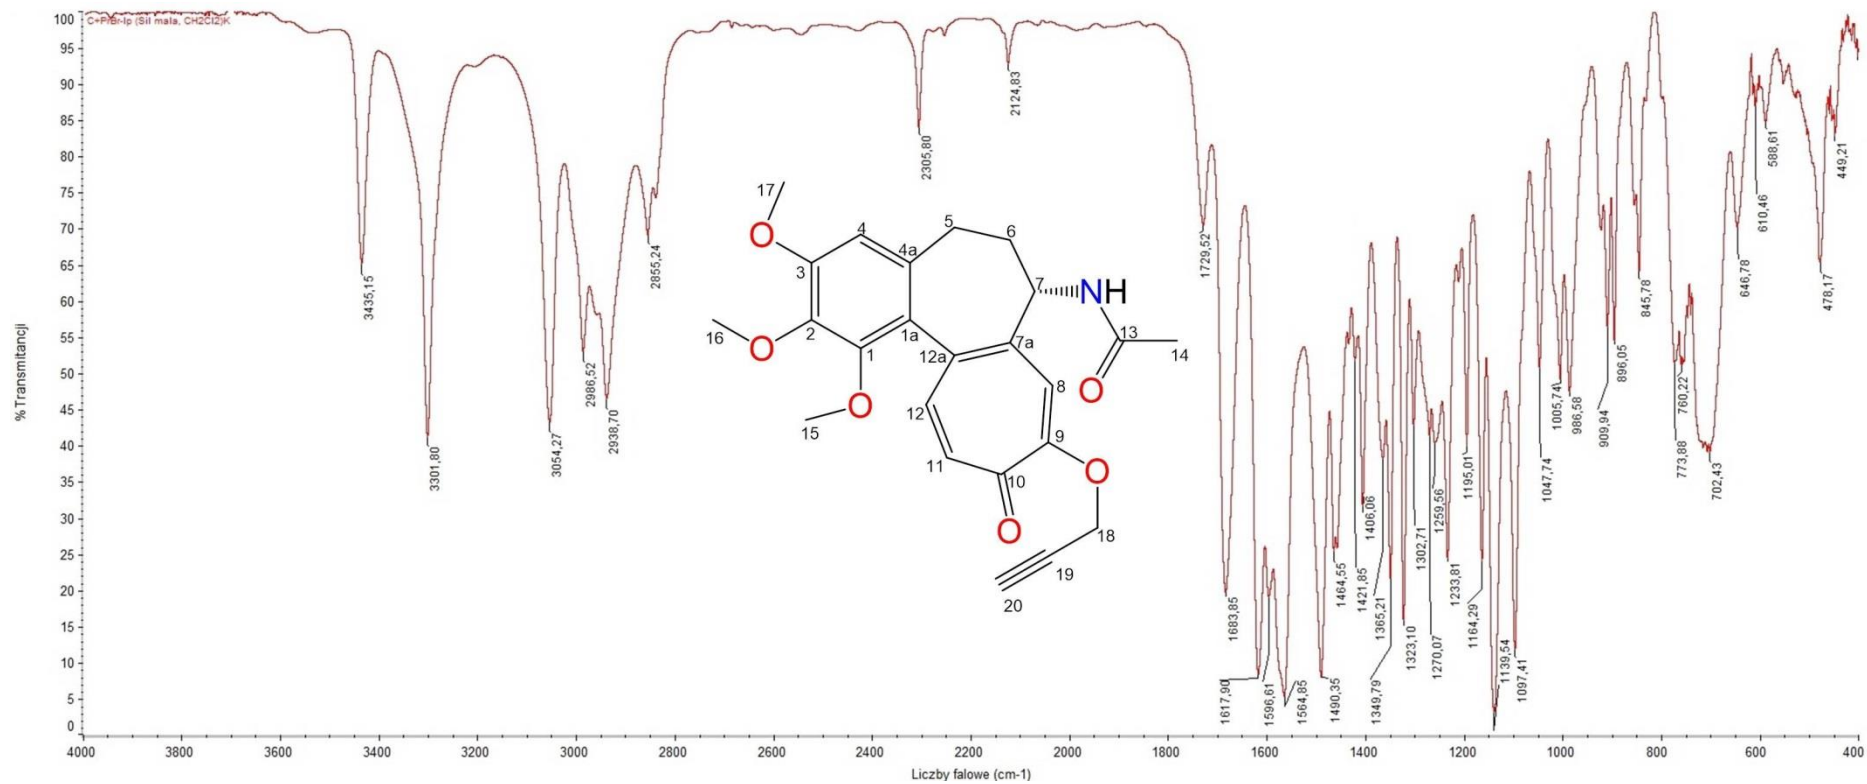

**Figure 13S.** FT-IR spectrum of compound **3f** (in CH<sub>2</sub>Cl<sub>2</sub>).

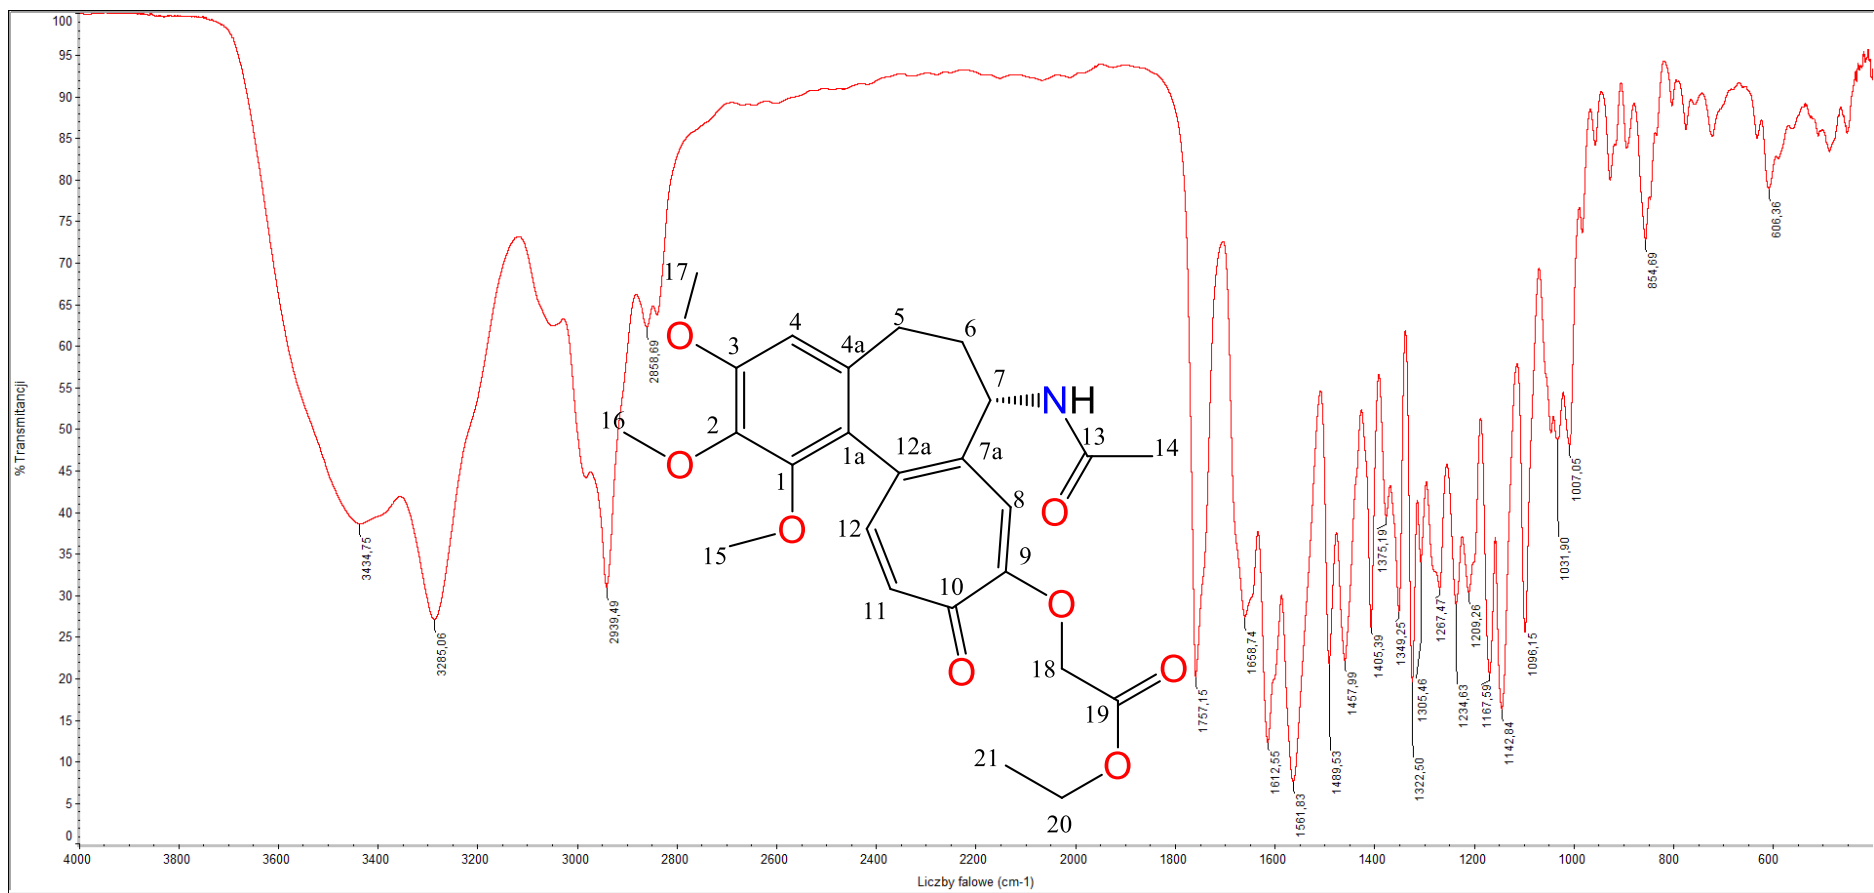

**Figure 14S.** FT-IR spectrum of compound **3g** (in KBr).

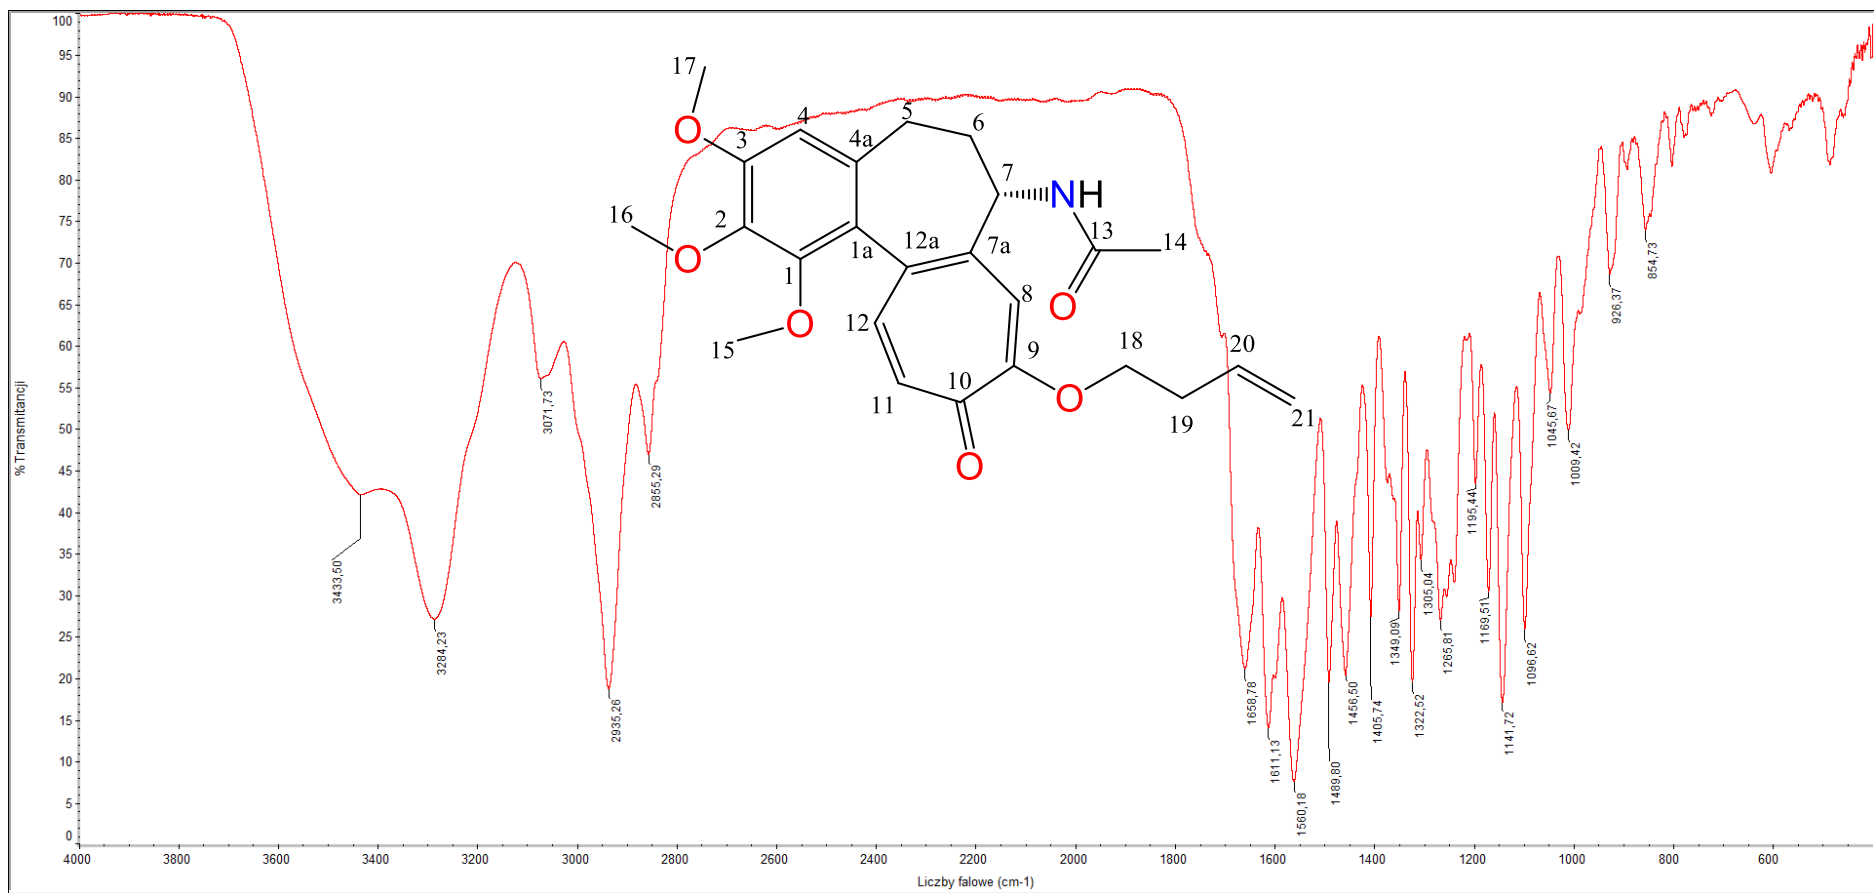

**Figure 15S.** FT-IR spectrum of compound **3h** (in KBr).

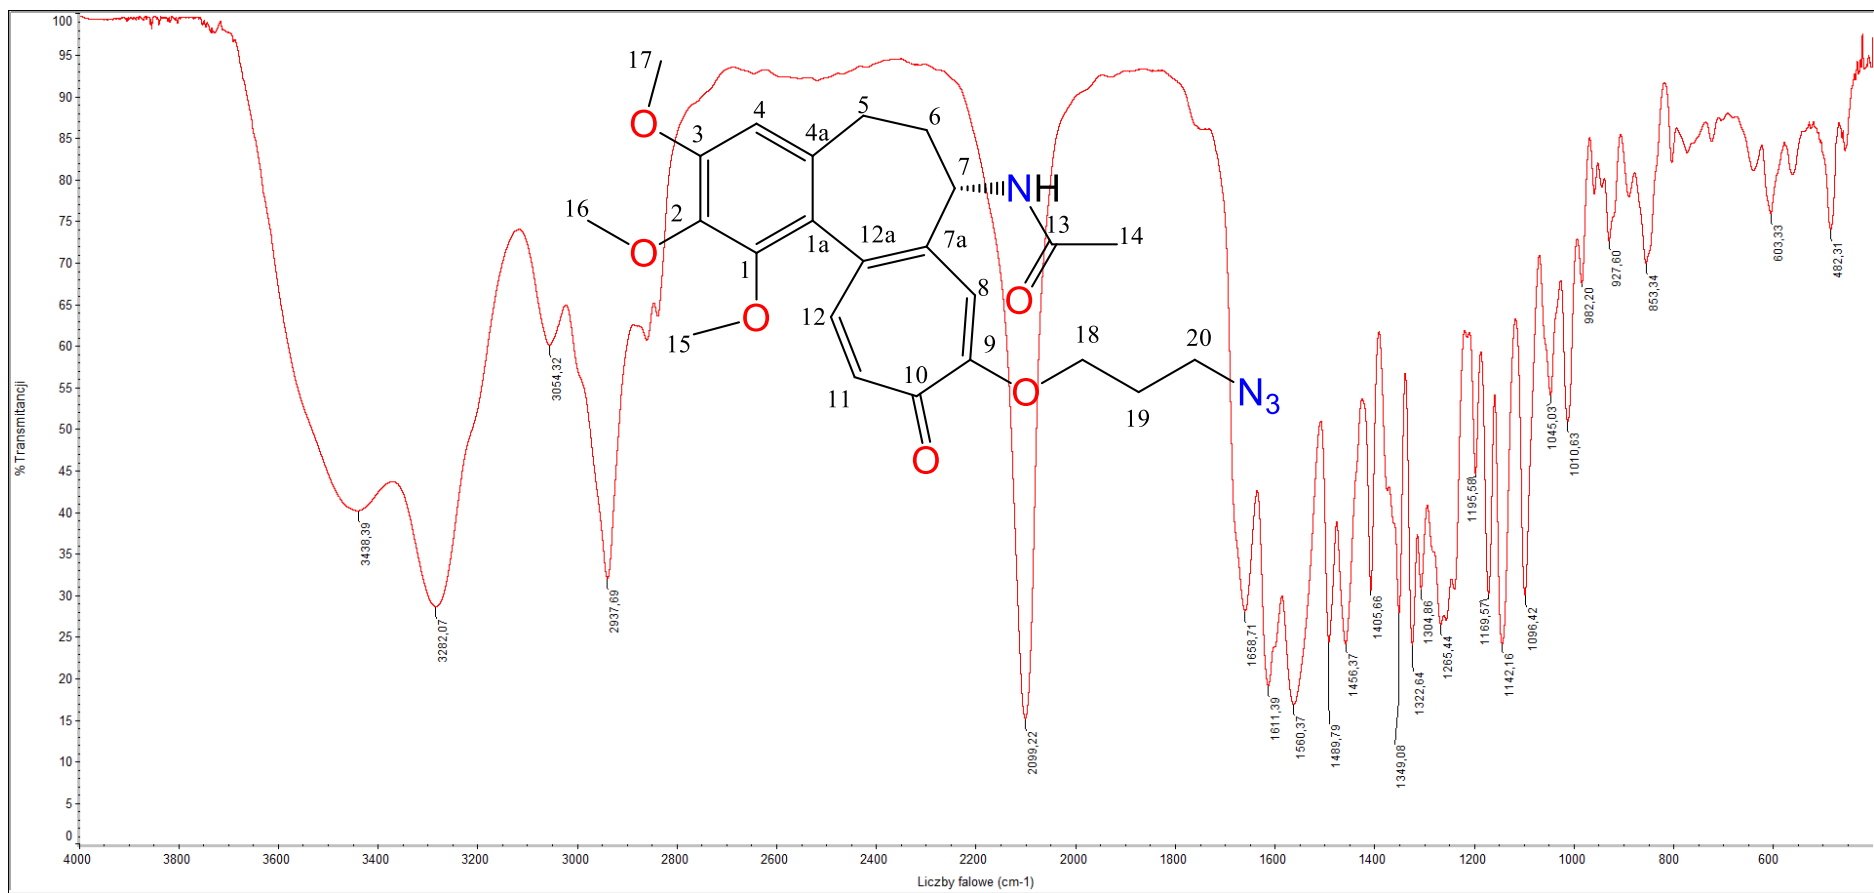

**Figure 16S.** FT-IR spectrum of compound **3i** (in KBr).

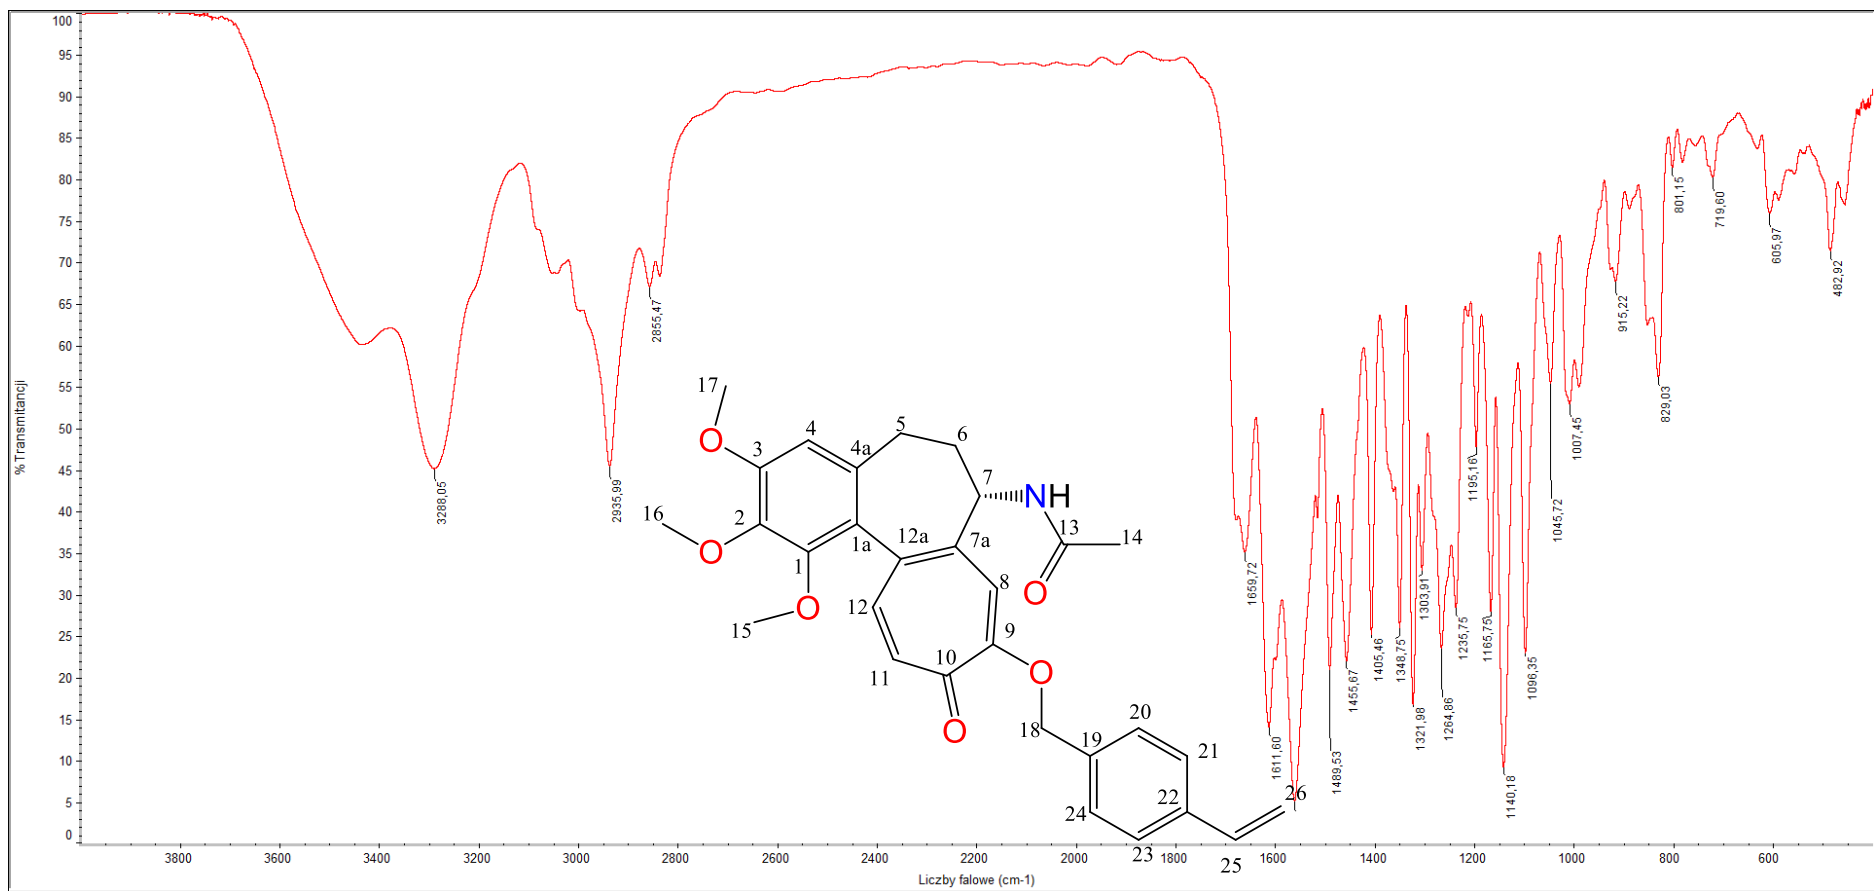

**Figure 17S.** FT-IR spectrum of compound **3j** (in KBr).

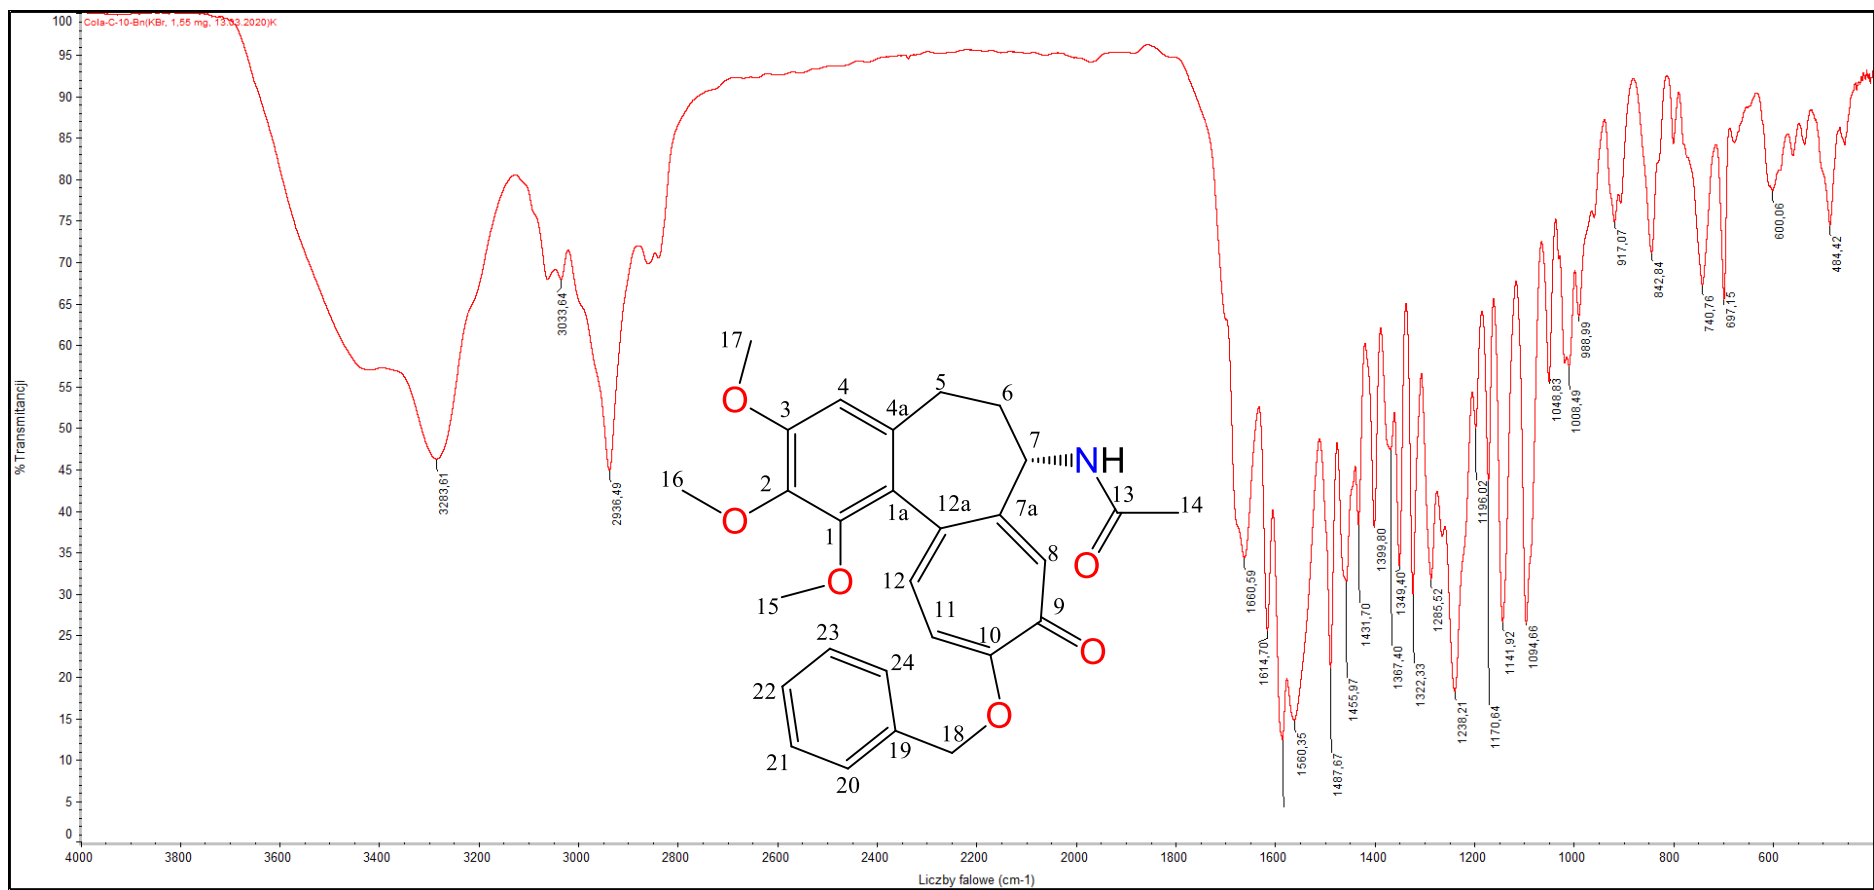

**Figure 18S.** FT-IR spectrum of compound **4a** (in KBr).





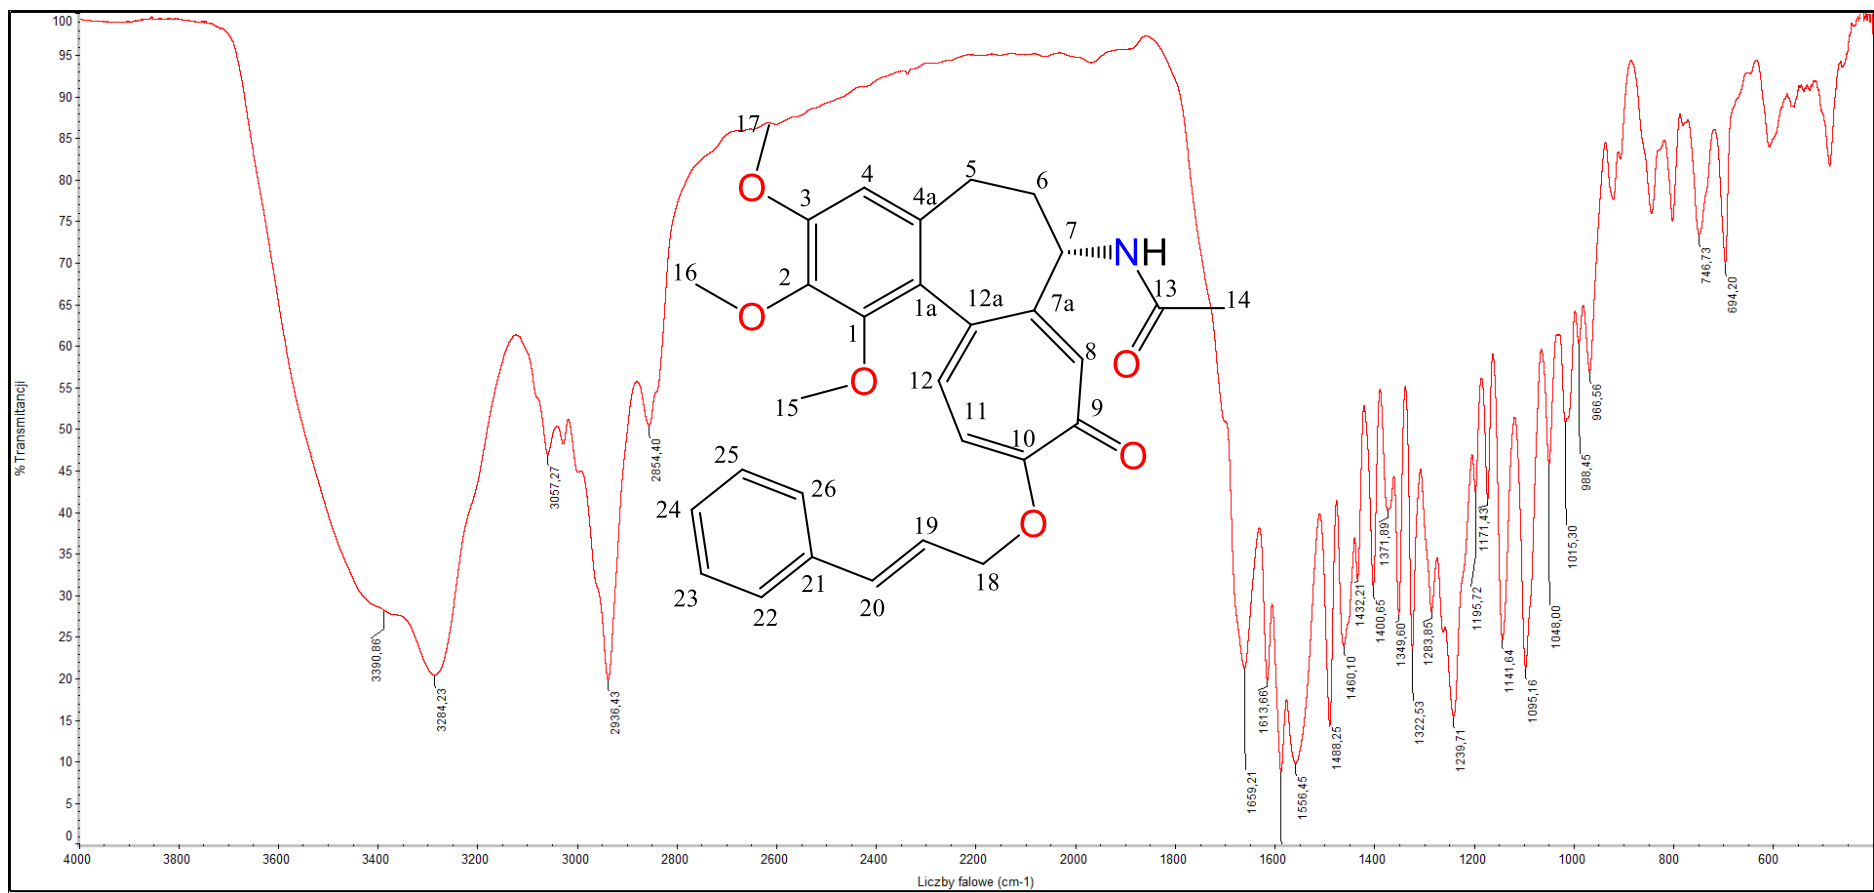

**Figure 20S.** FT-IR spectrum of compound **4c** (in KBr).

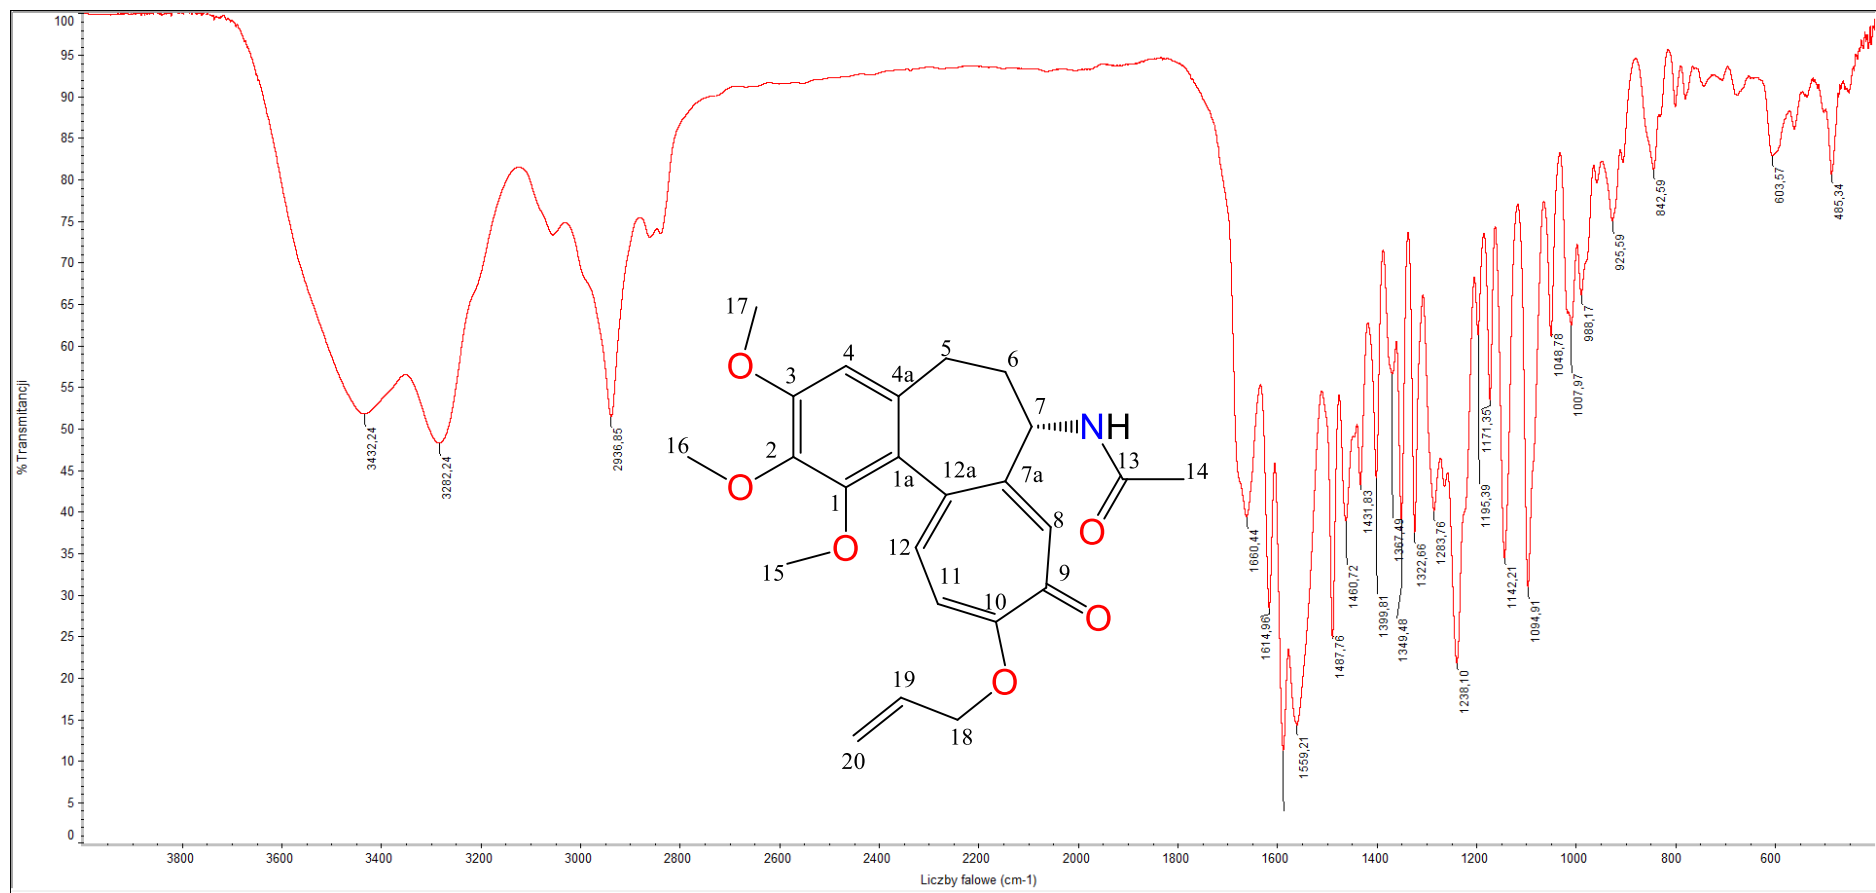

**Figure 21S.** FT-IR spectrum of compound **4d** (in KBr).

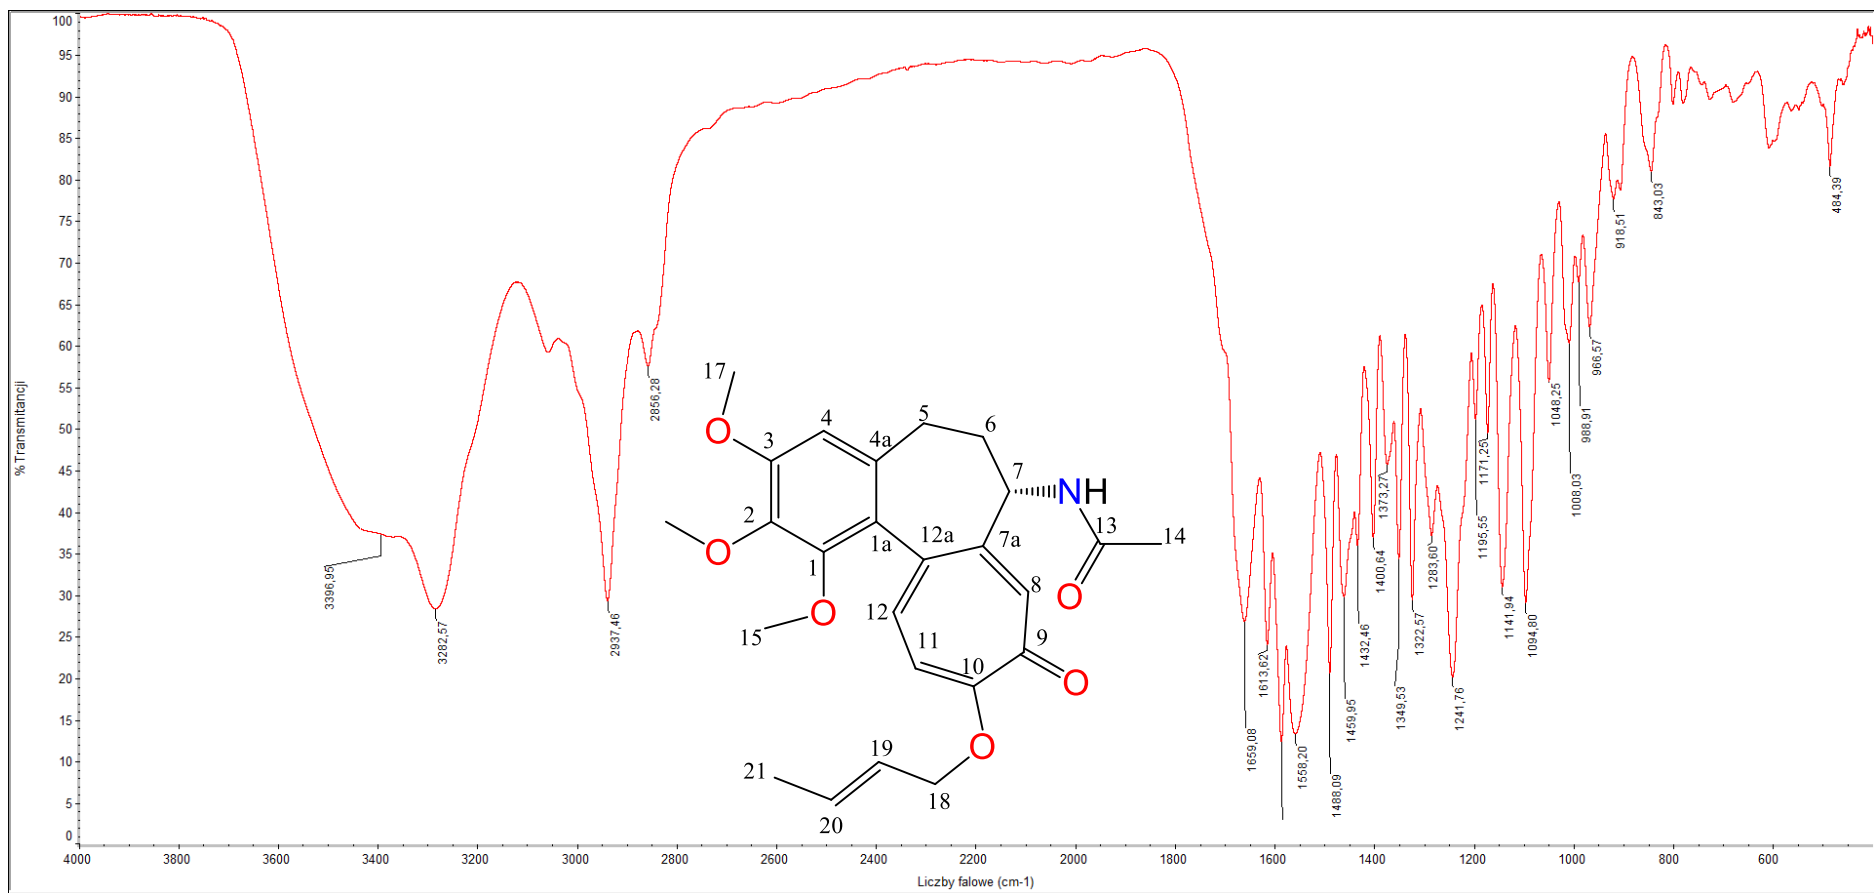

**Figure 22S.** FT-IR spectrum of compound **4e** (in KBr).

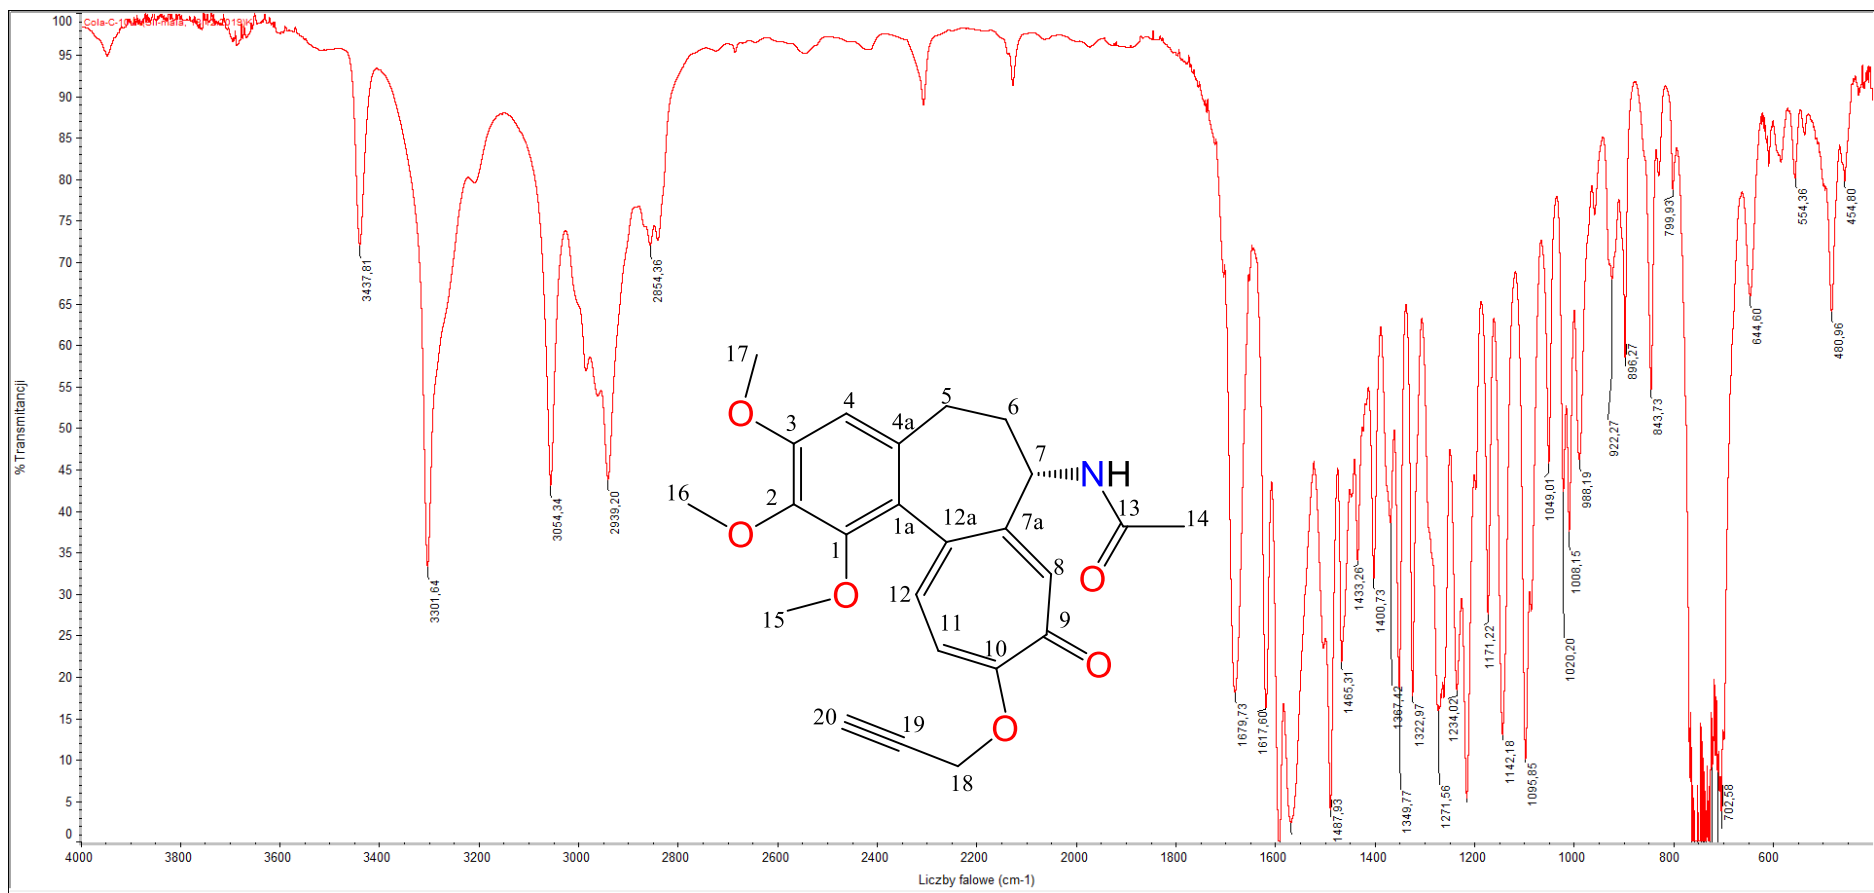

**Figure 23S.** FT-IR spectrum of compound **4f** (in  $\text{CH}_2\text{Cl}_2$ ).

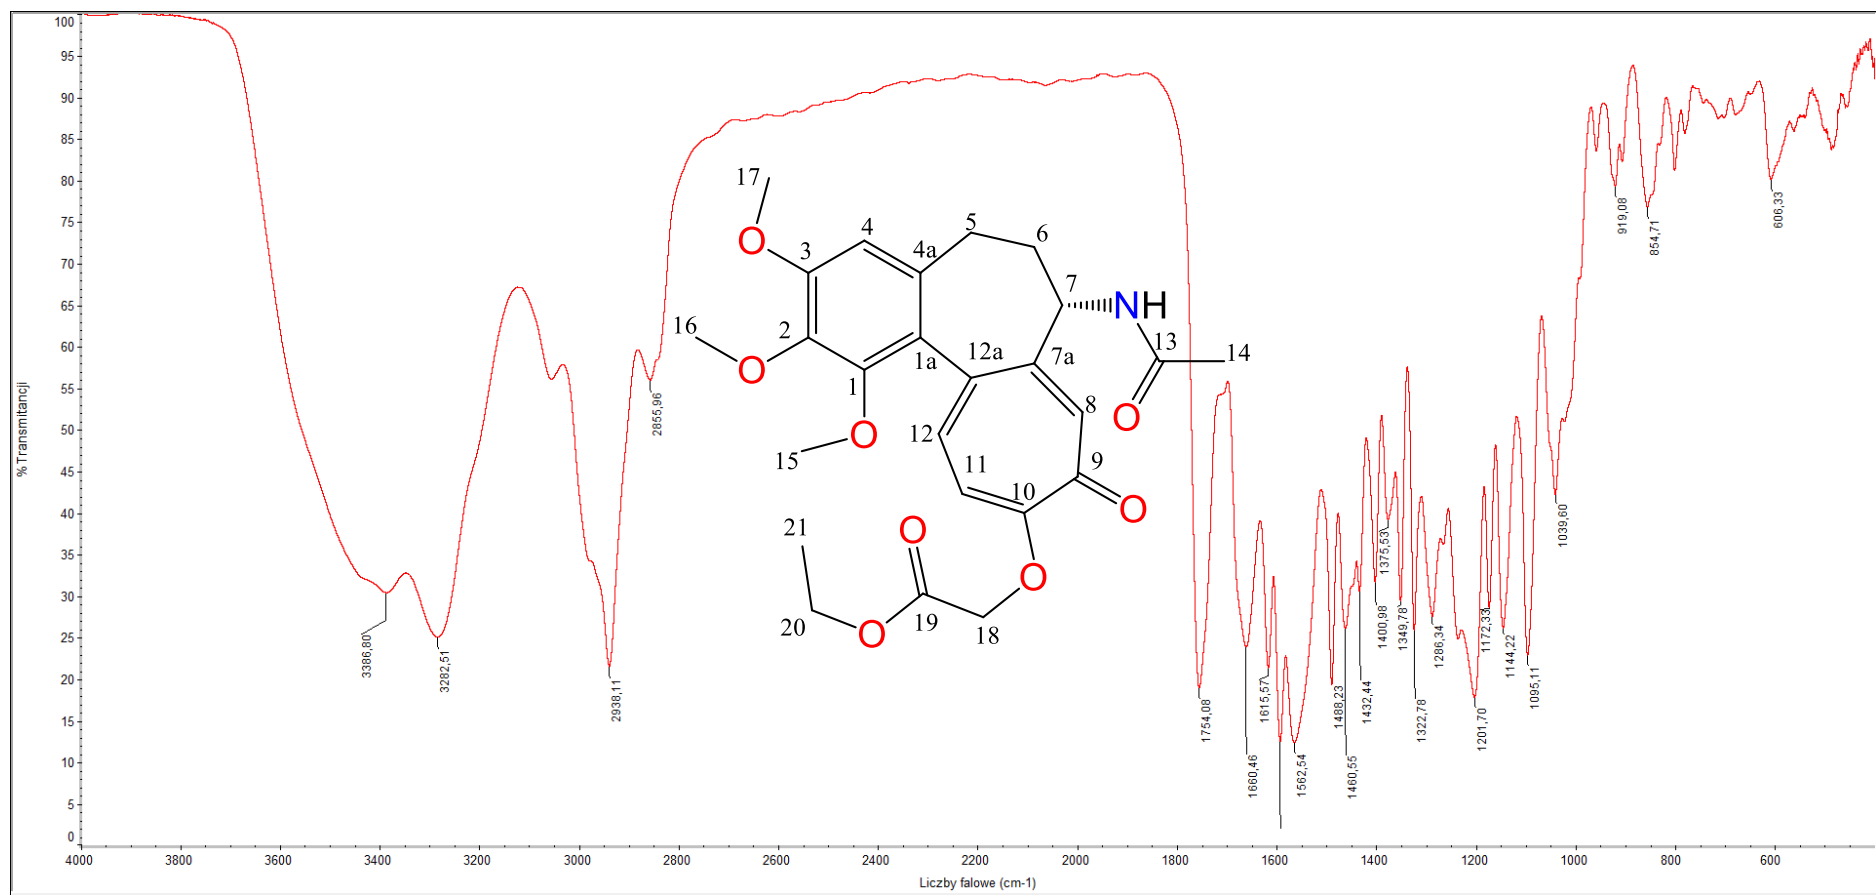

**Figure 24S.** FT-IR spectrum of compound **4g** (in KBr).

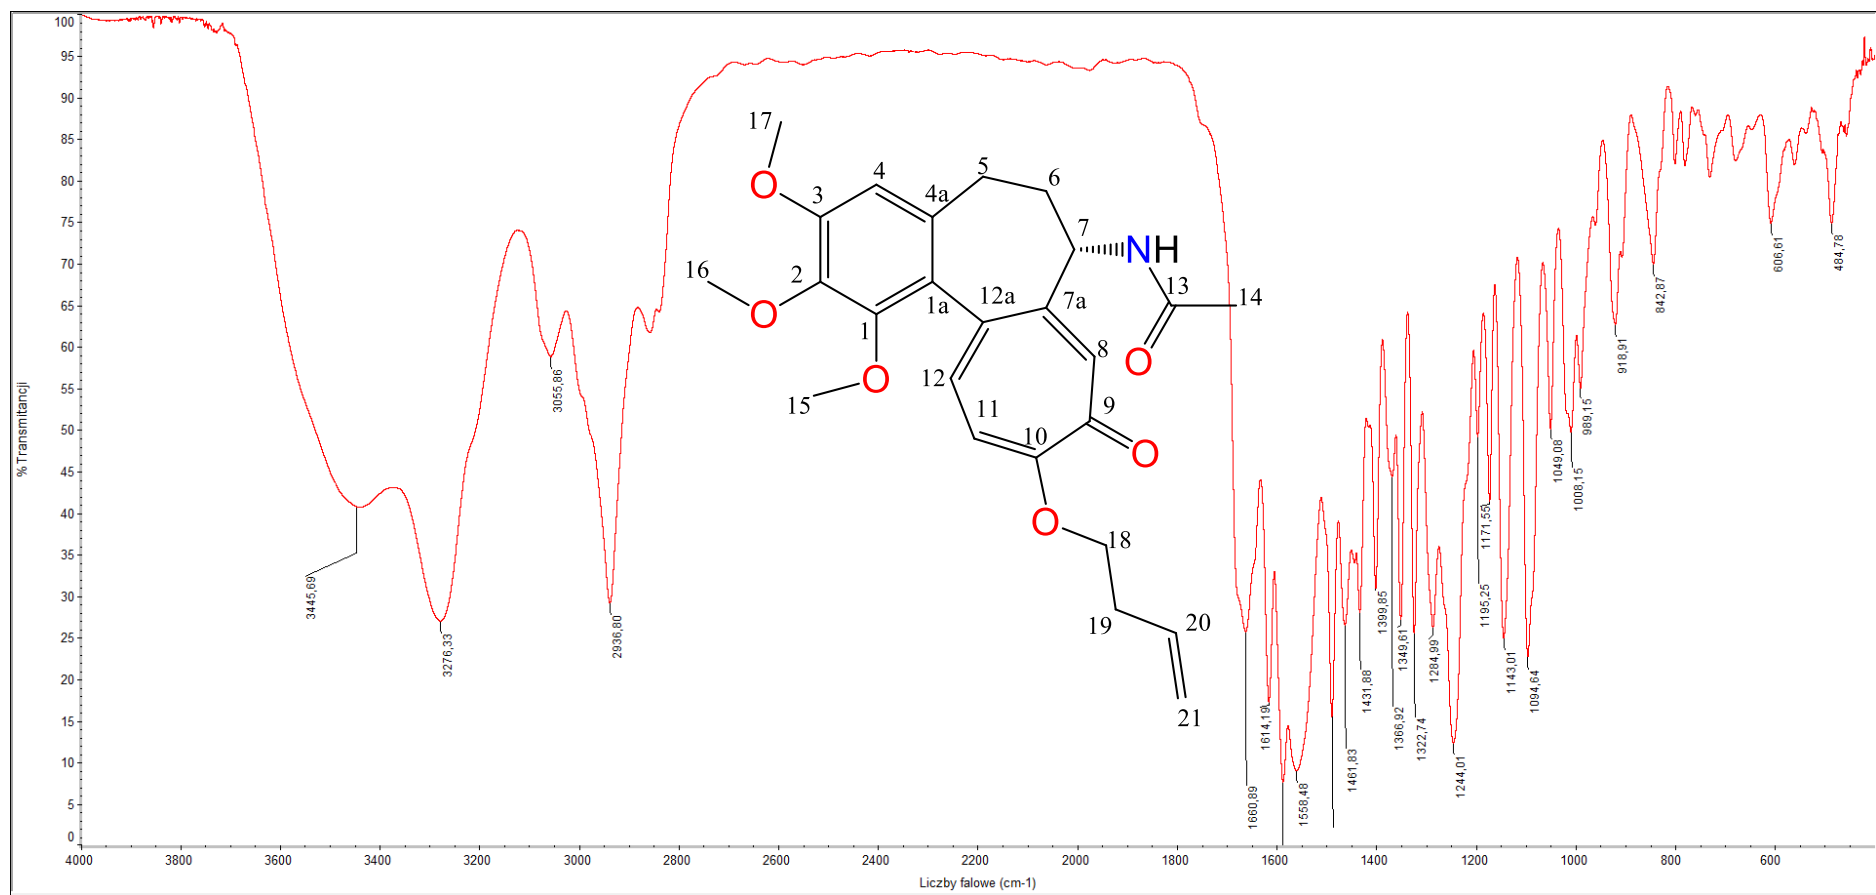

**Figure 25S.** FT-IR spectrum of compound **4h** (in KBr).

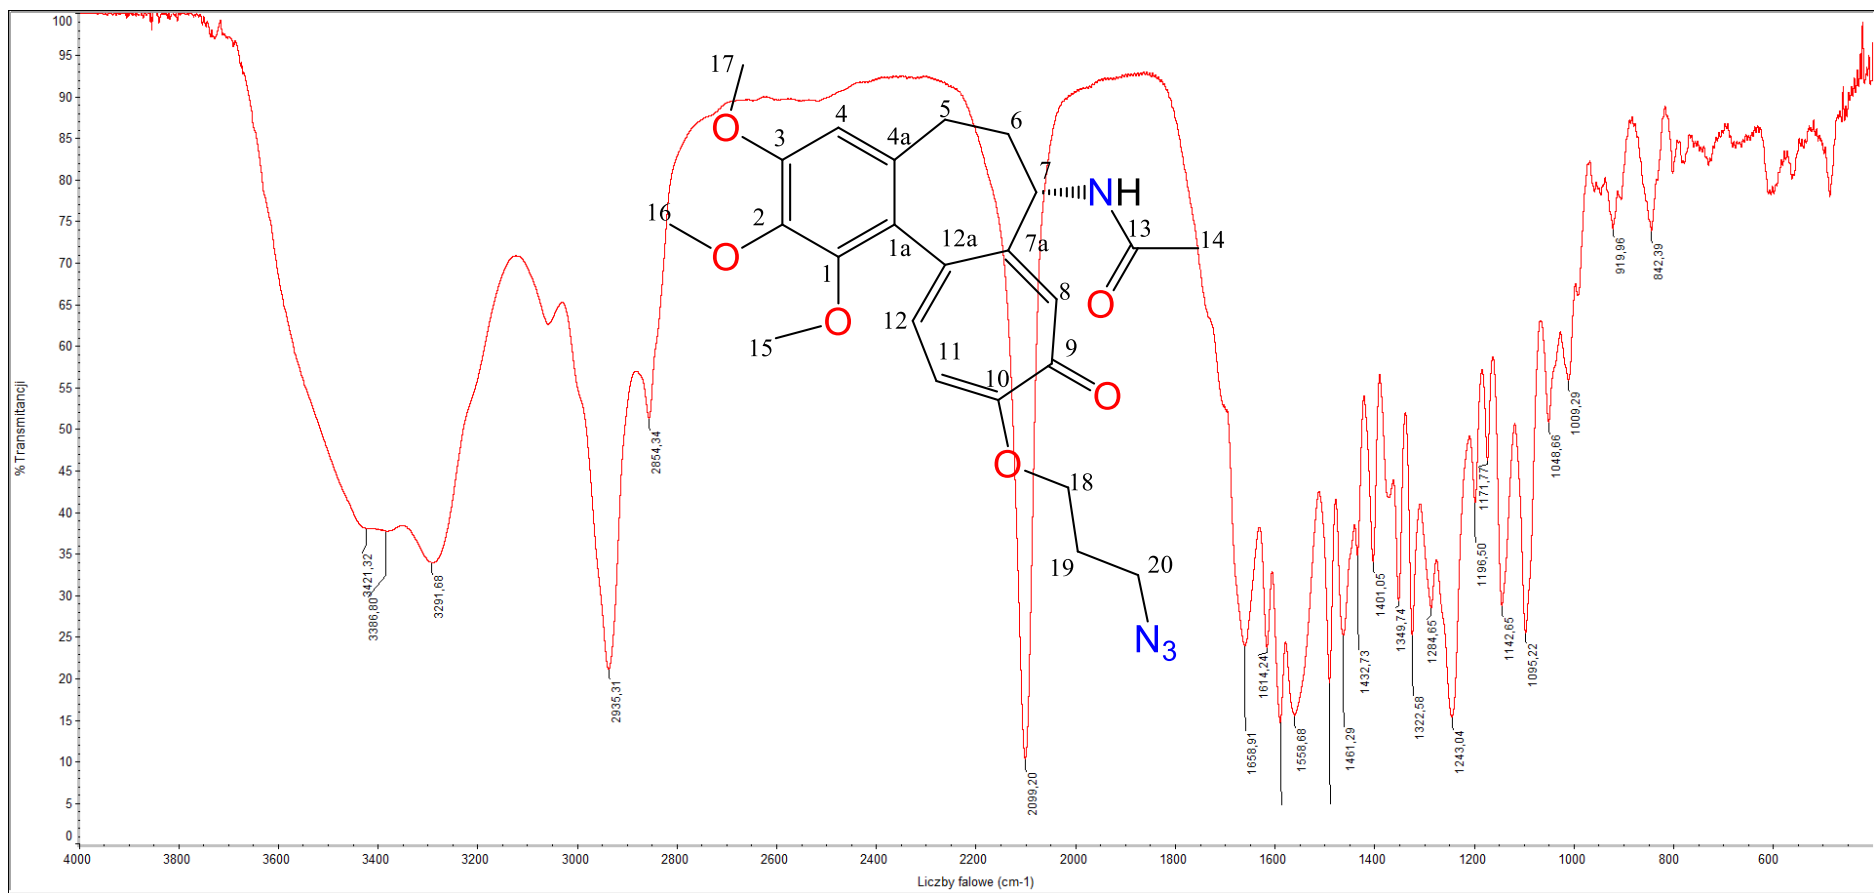

**Figure 26S.** FT-IR spectrum of compound **4i** (in KBr).



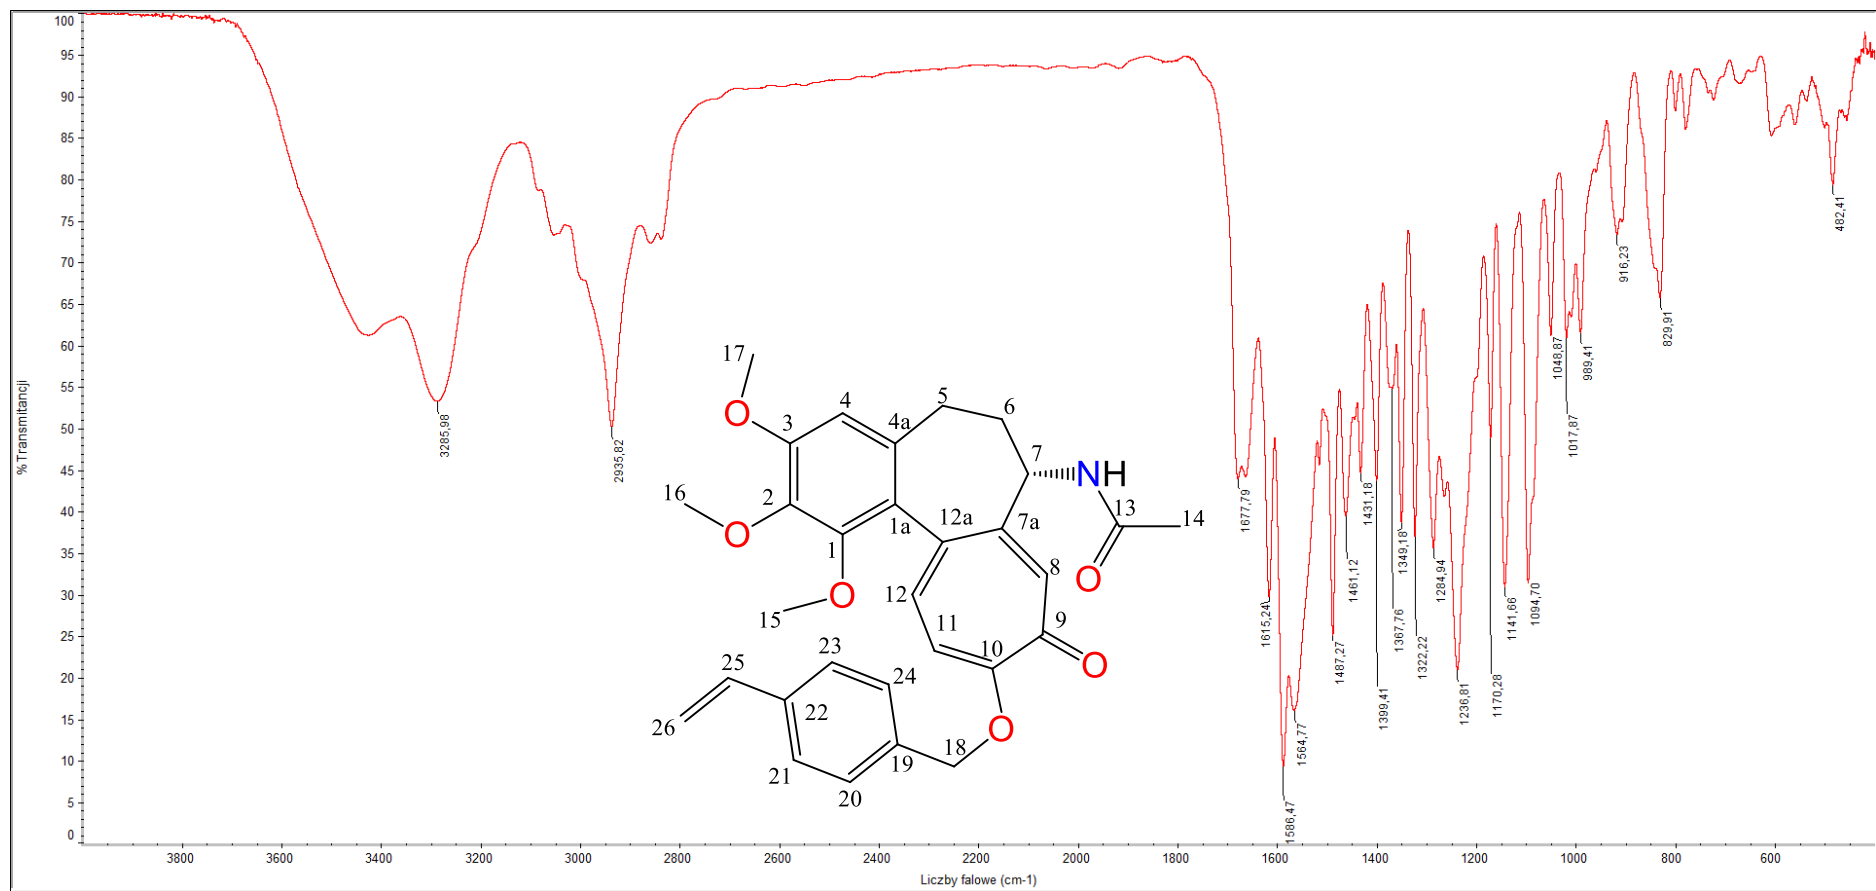

**Figure 27S.** FT-IR spectrum of compound **4j** (in KBr).

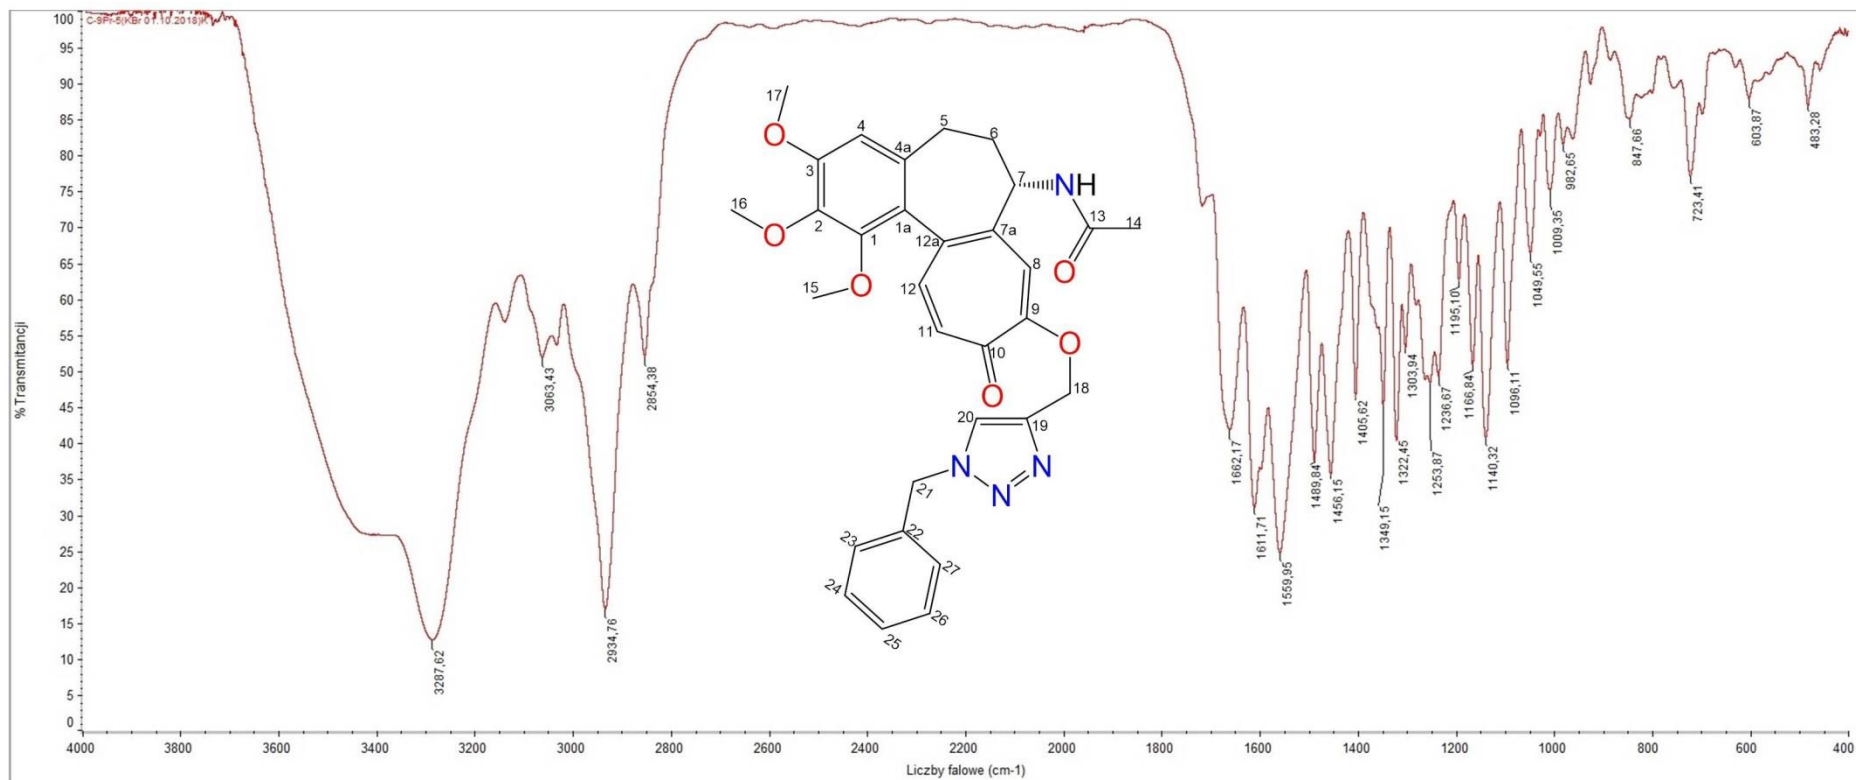

**Figure 28S.** FT-IR spectrum of compound **5a** (in KBr).

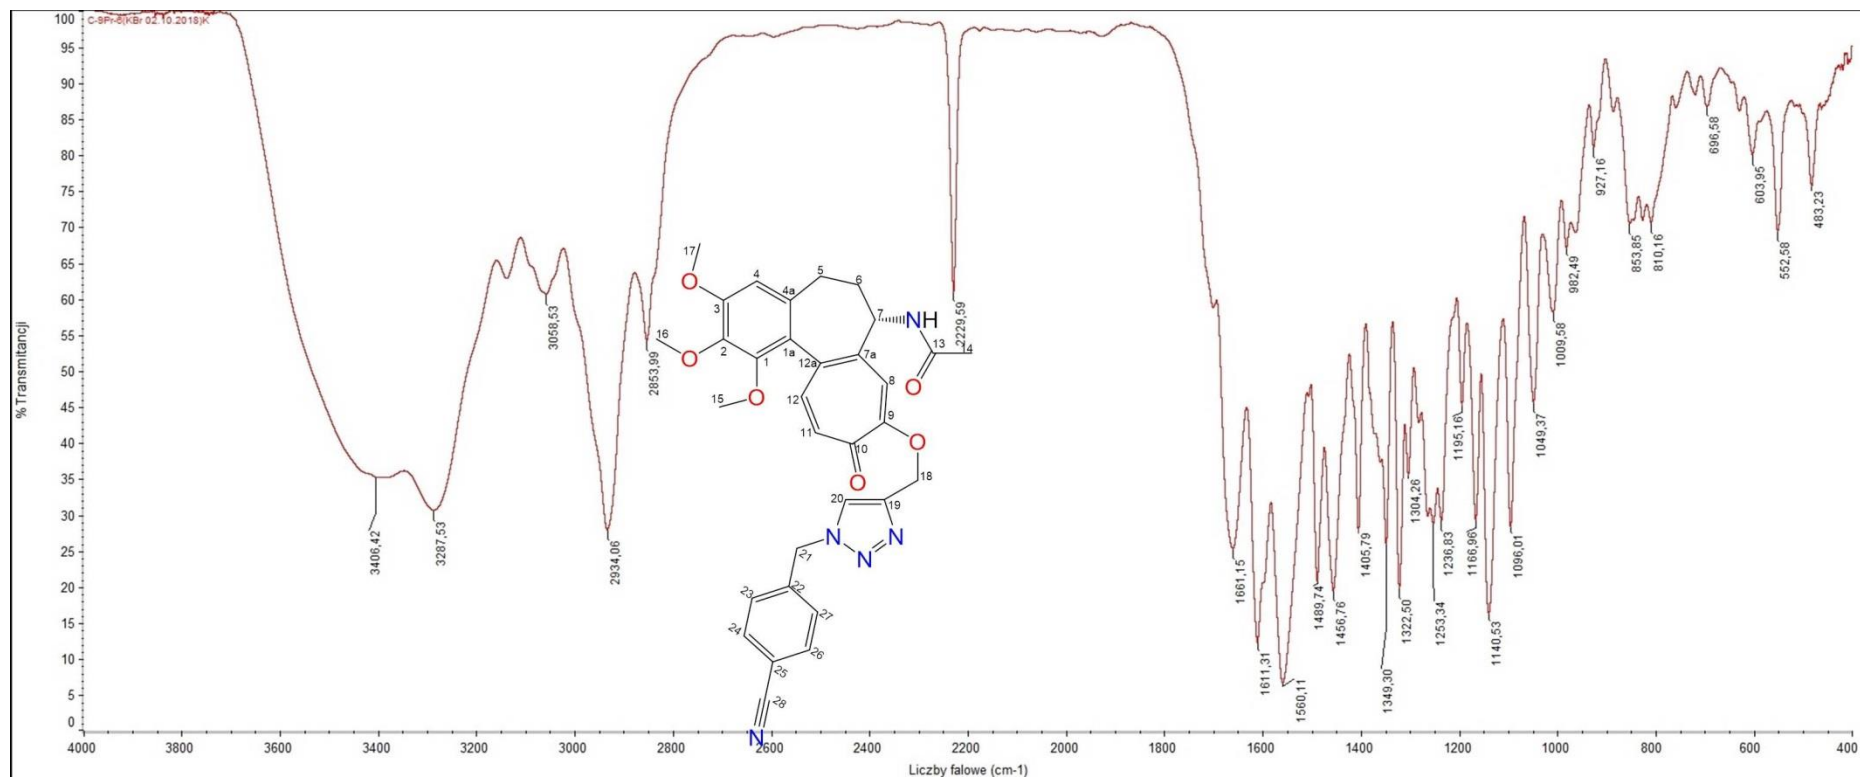

**Figure 29S.** FT-IR spectrum of compound **5b** (in KBr).

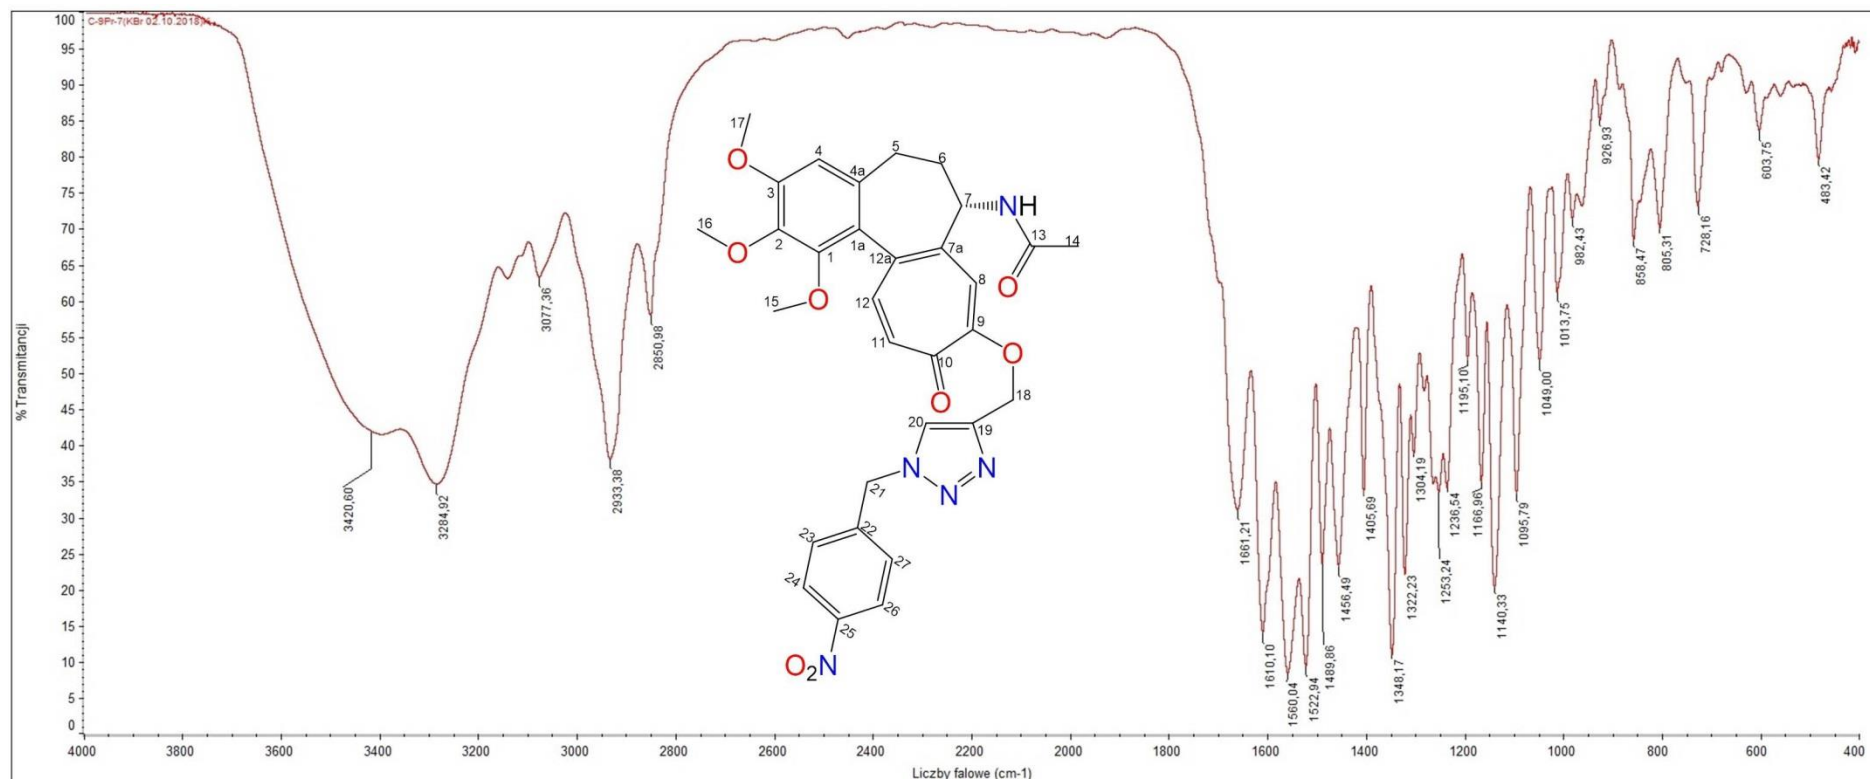

**Figure 30S.** FT-IR spectrum of compound **5c** (in KBr).

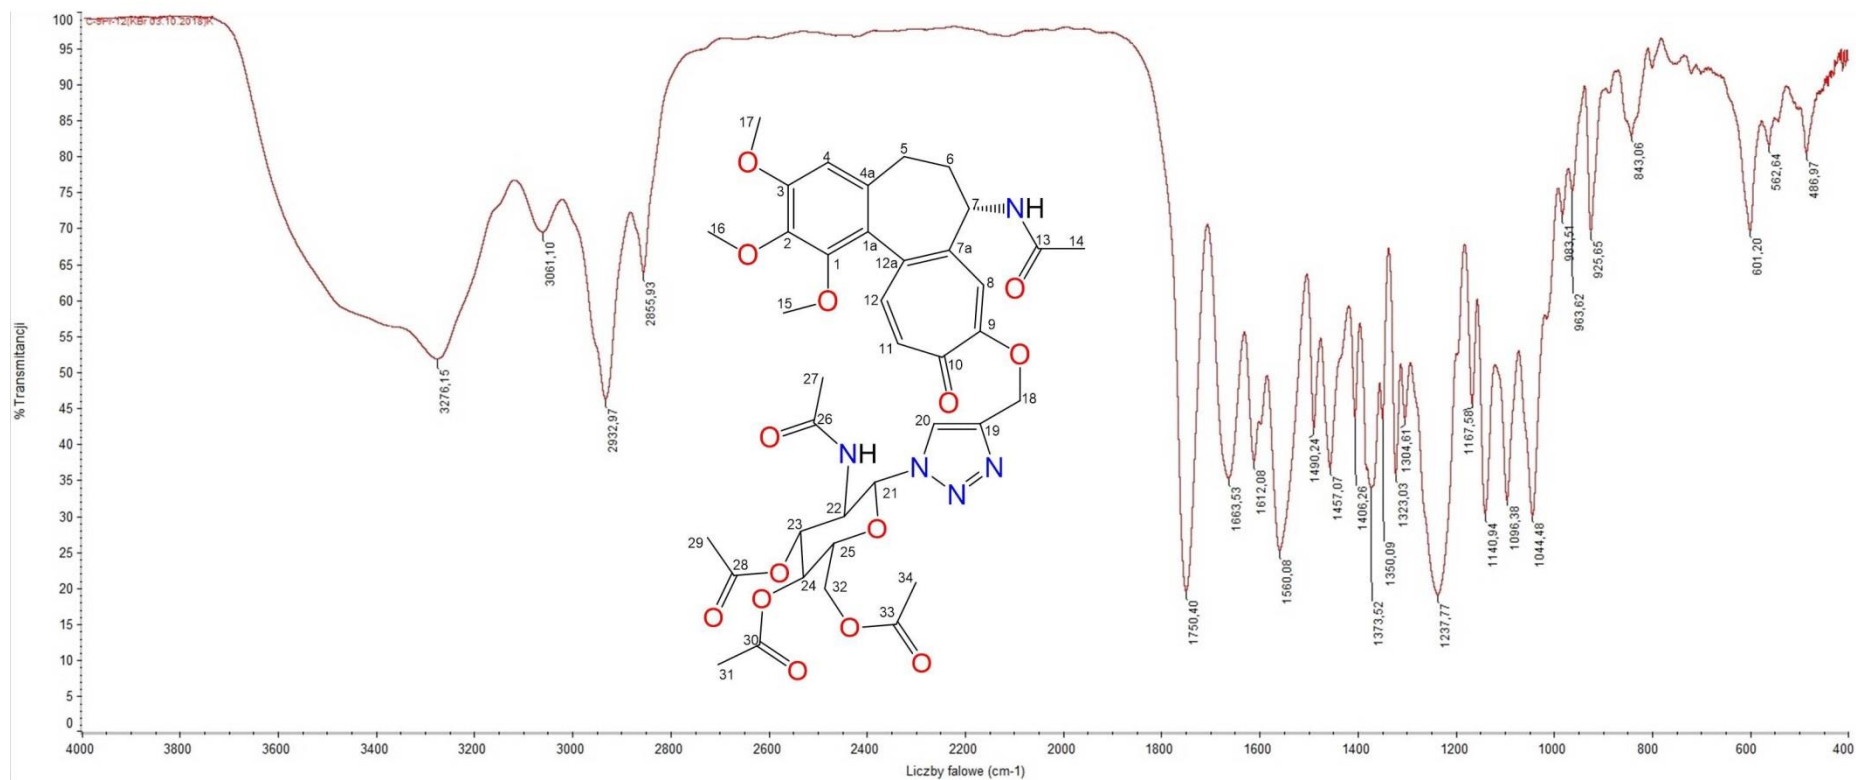

**Figure 31S.** FT-IR spectrum of compound **5d** (in KBr).

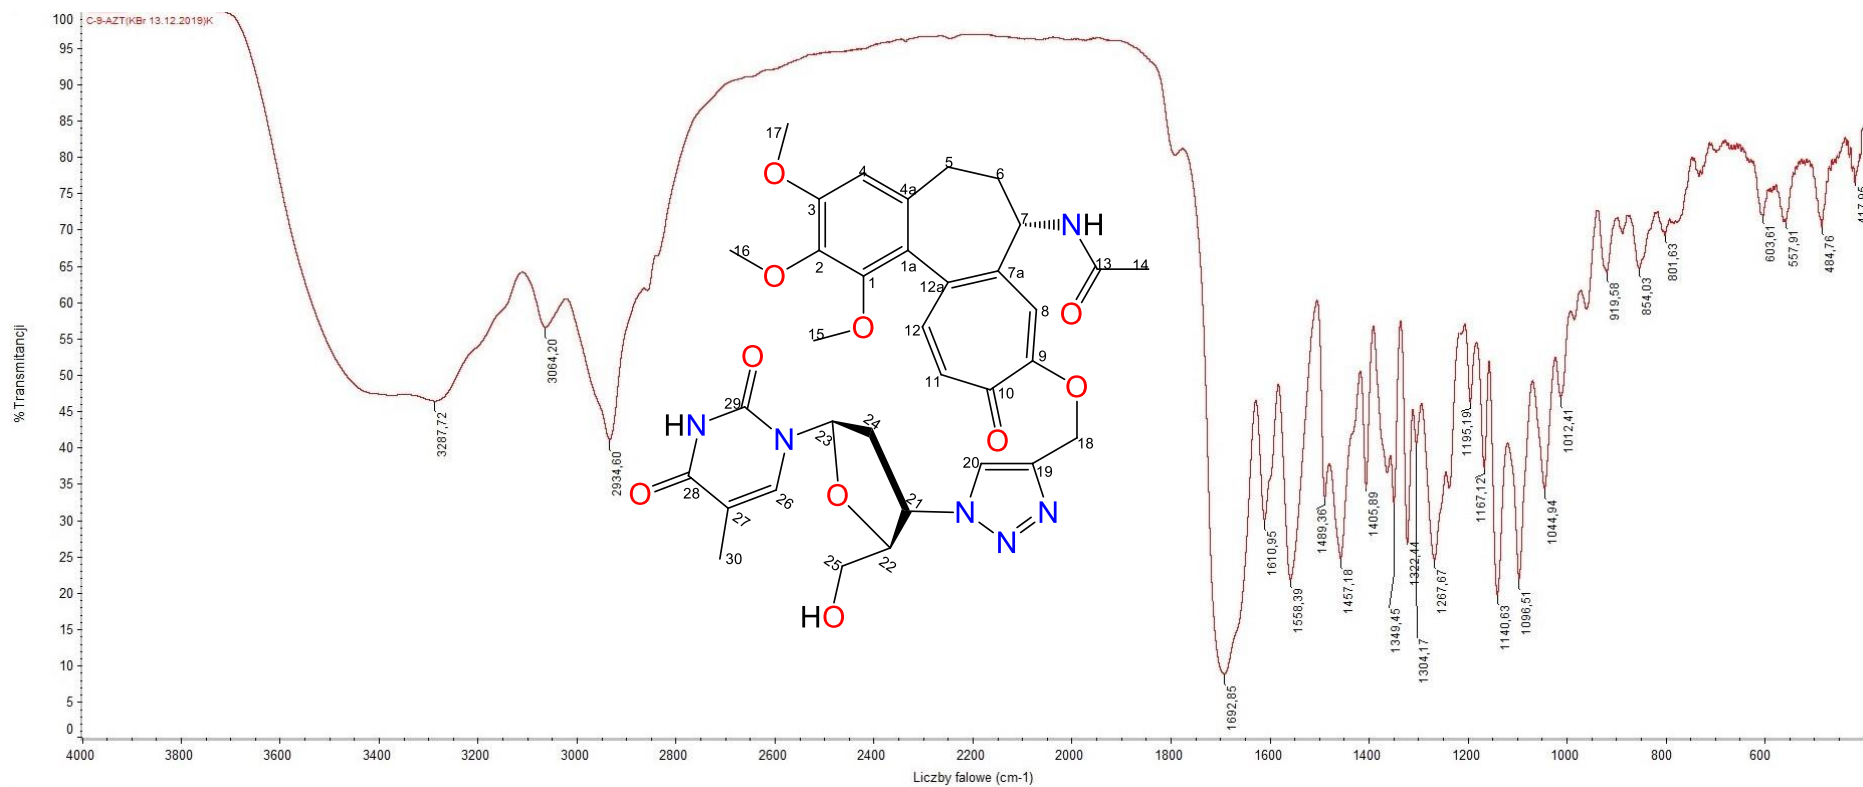

**Figure 32S.** FT-IR spectrum of compound **5e** (in KBr).

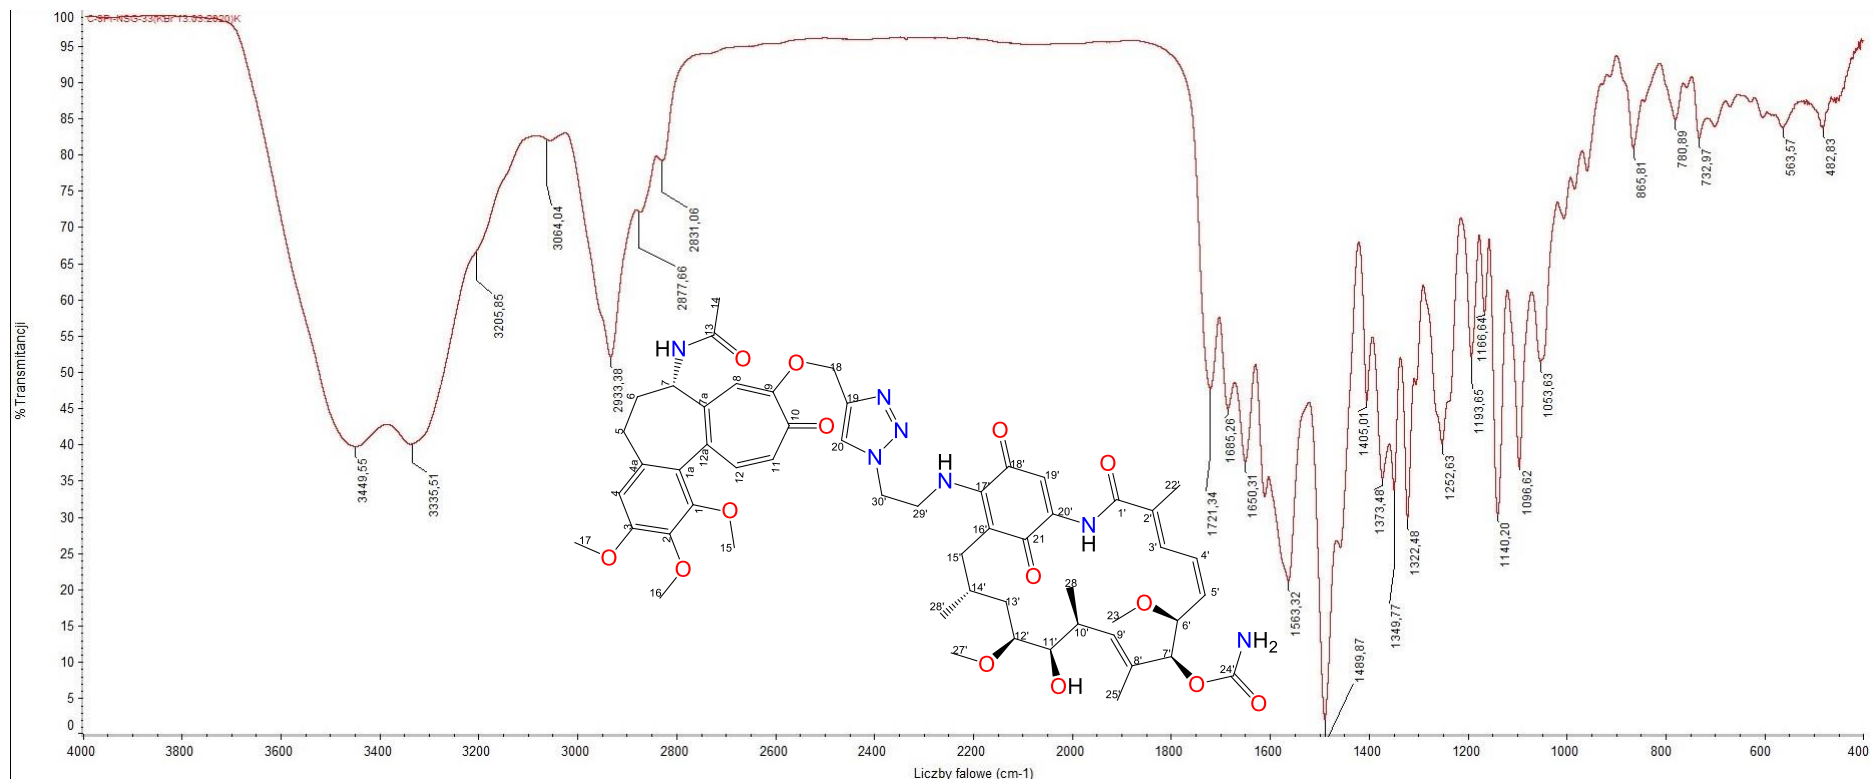

**Figure 33S.** FT-IR spectrum of compound **5f** (in KBr).

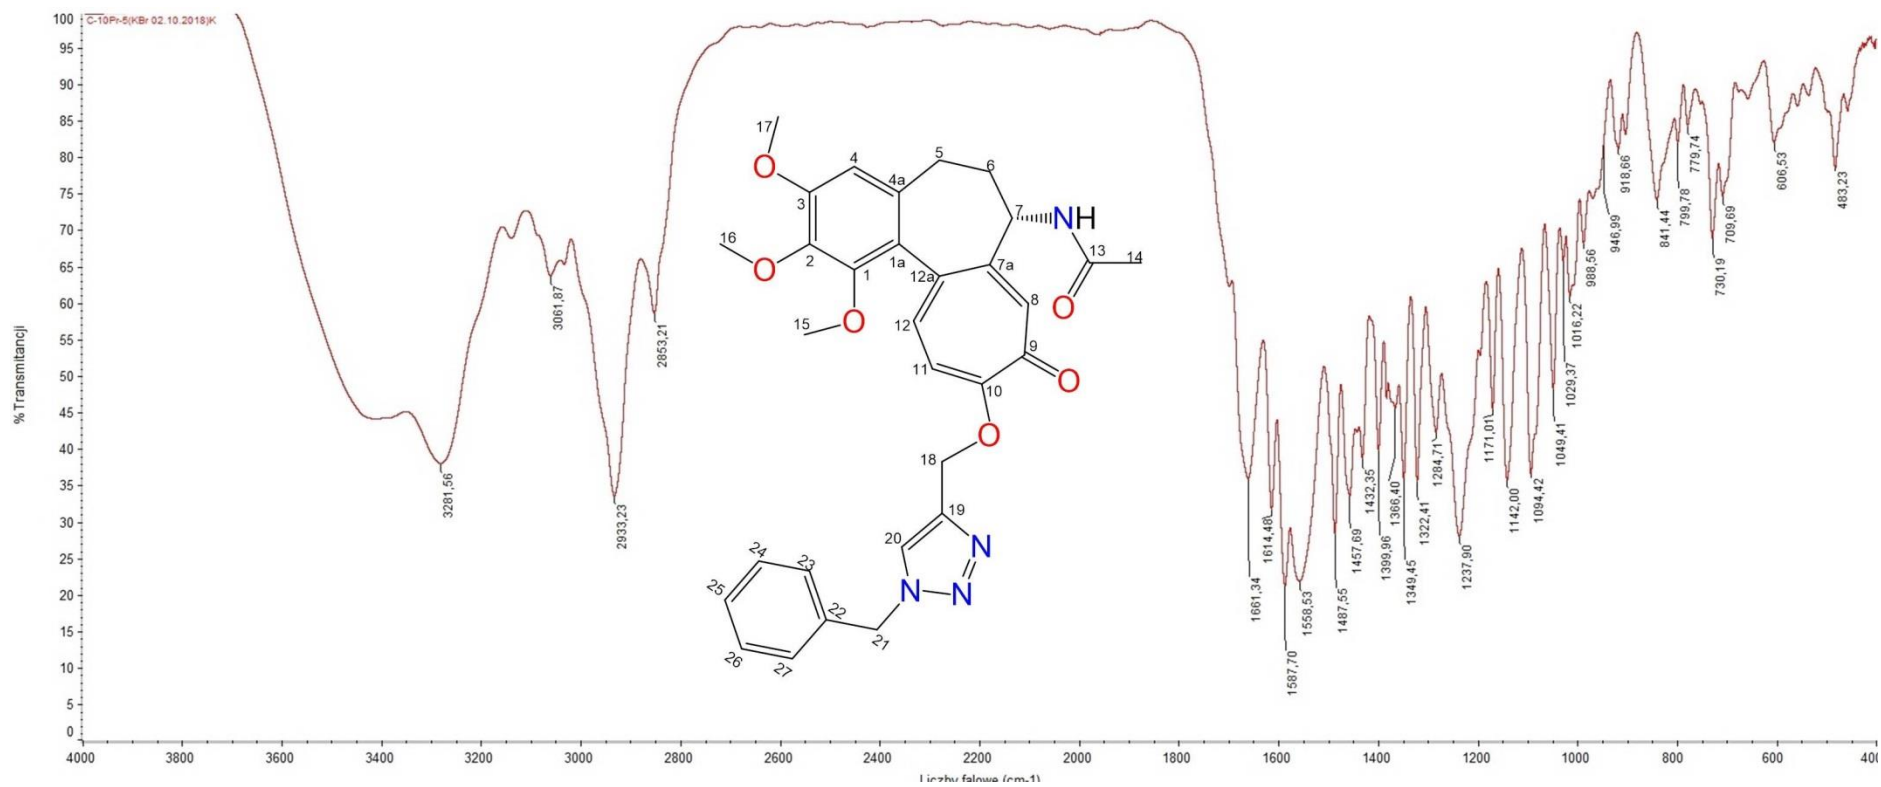

**Figure 34S.** FT-IR spectrum of compound **6a** (in KBr).



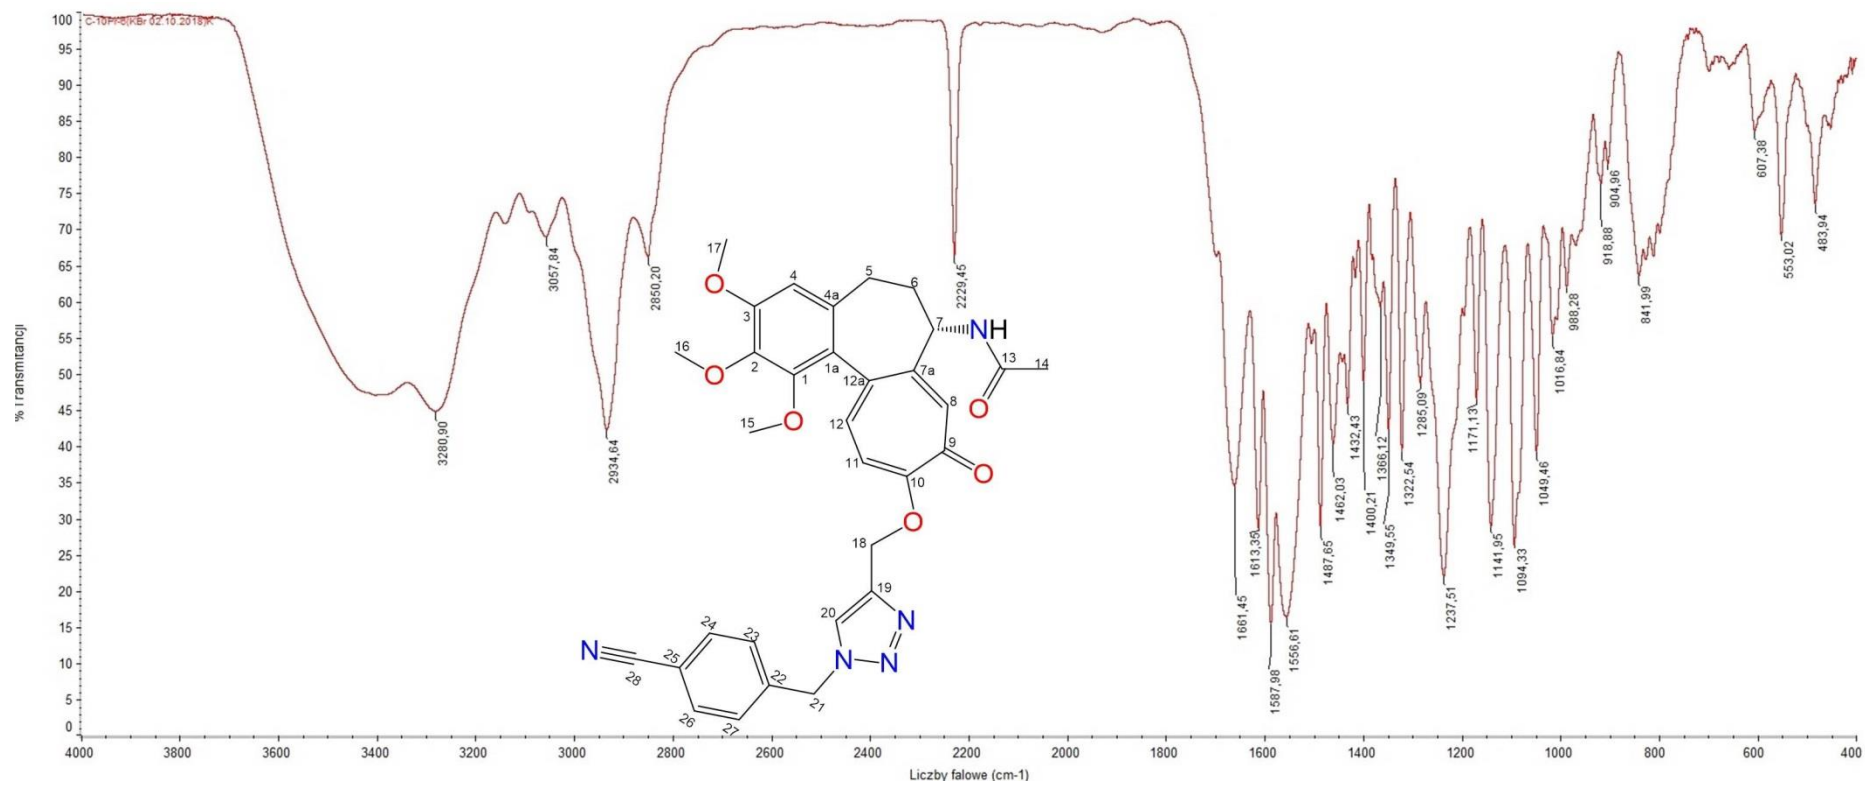

**Figure 35S.** FT-IR spectrum of compound **6b** (in KBr).

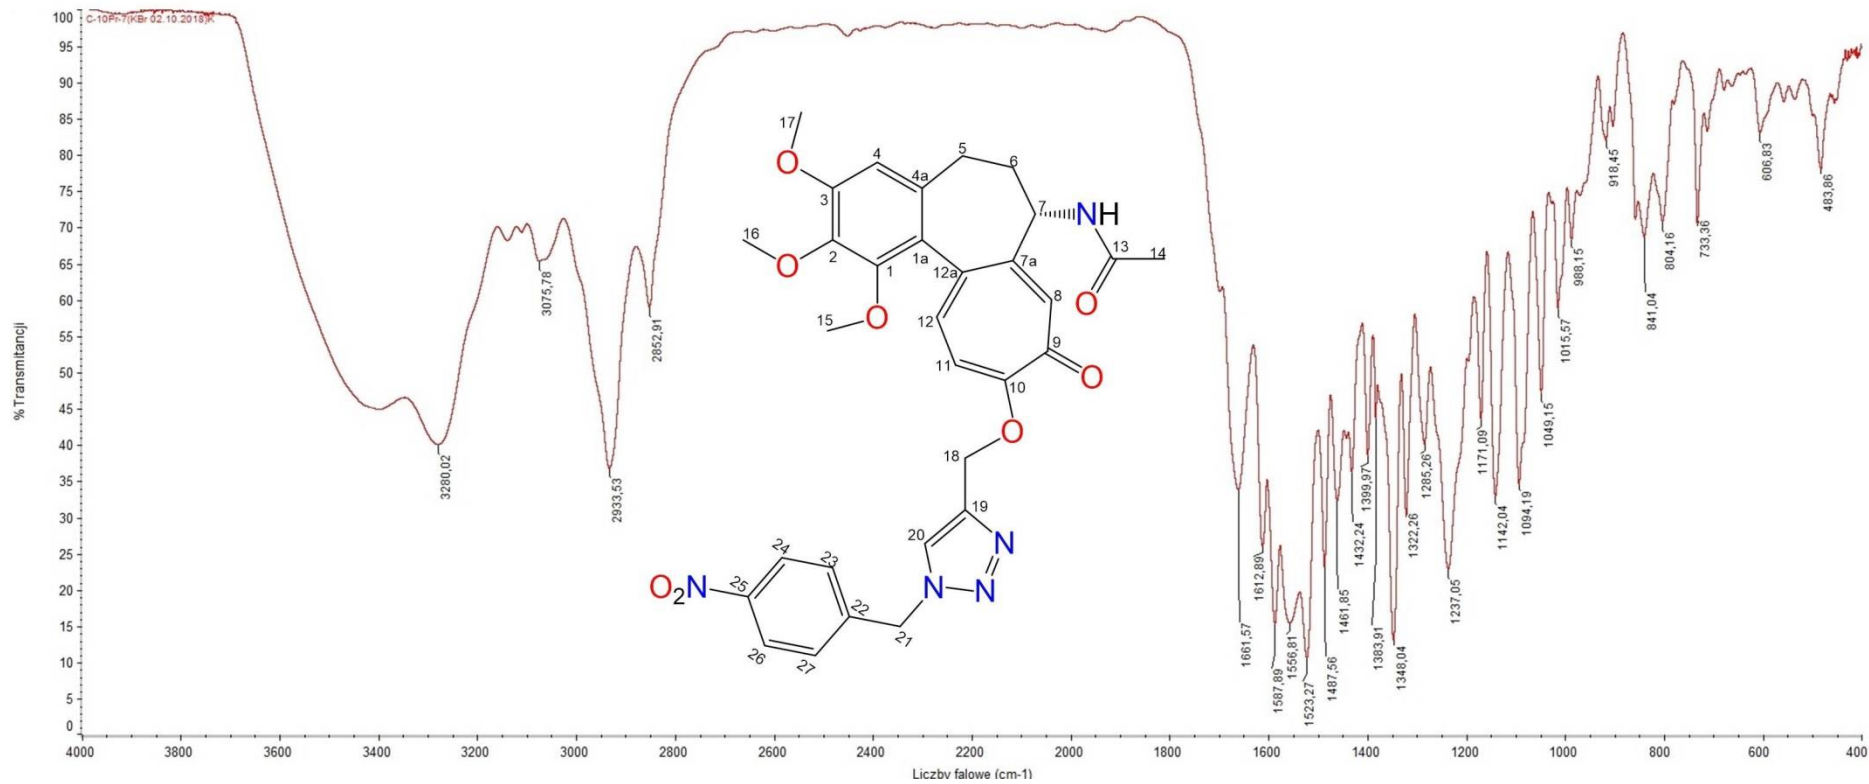

**Figure 36S.** FT-IR spectrum of compound **6c** (in KBr).

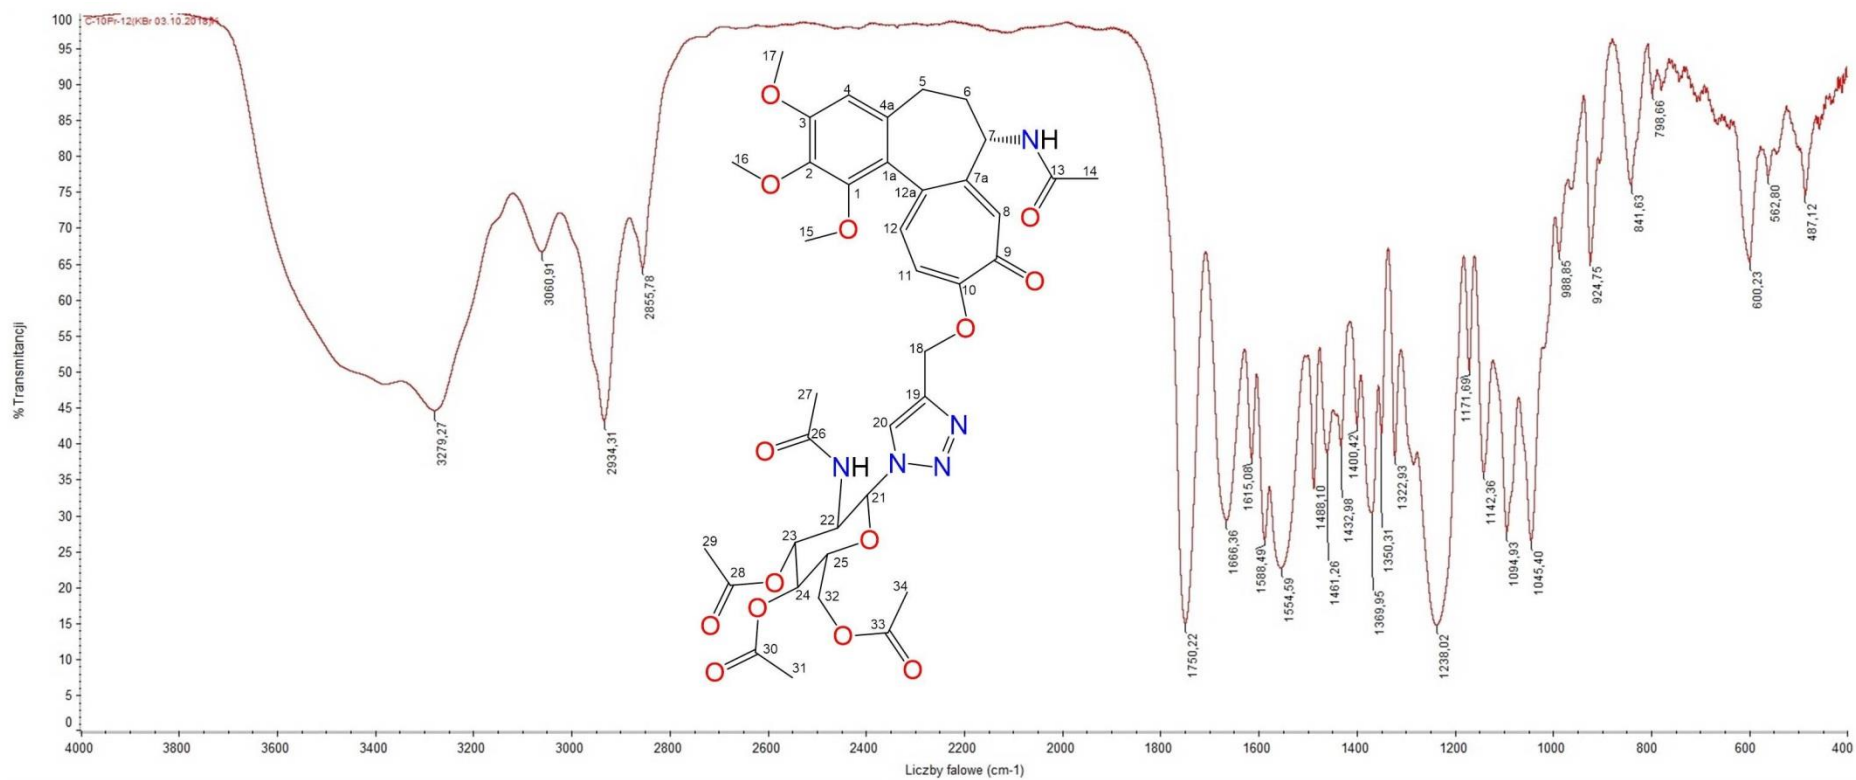

**Figure 37S.** FT-IR spectrum of compound **6d** (in KBr).

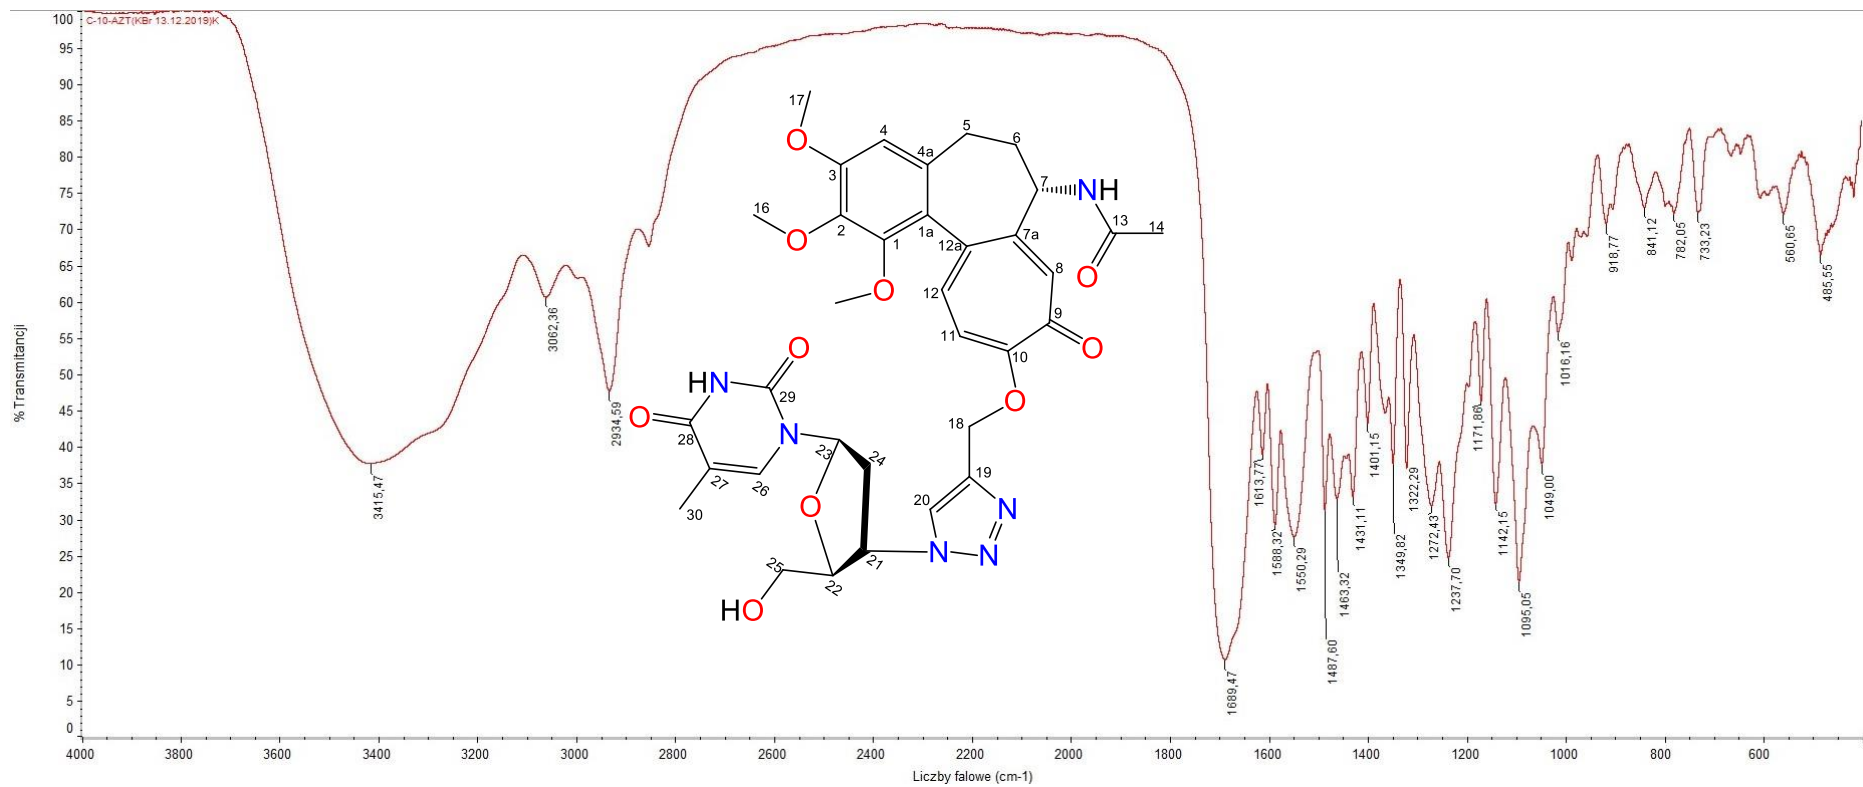

**Figure 38S.** FT-IR spectrum of compound **6e** (in KBr).

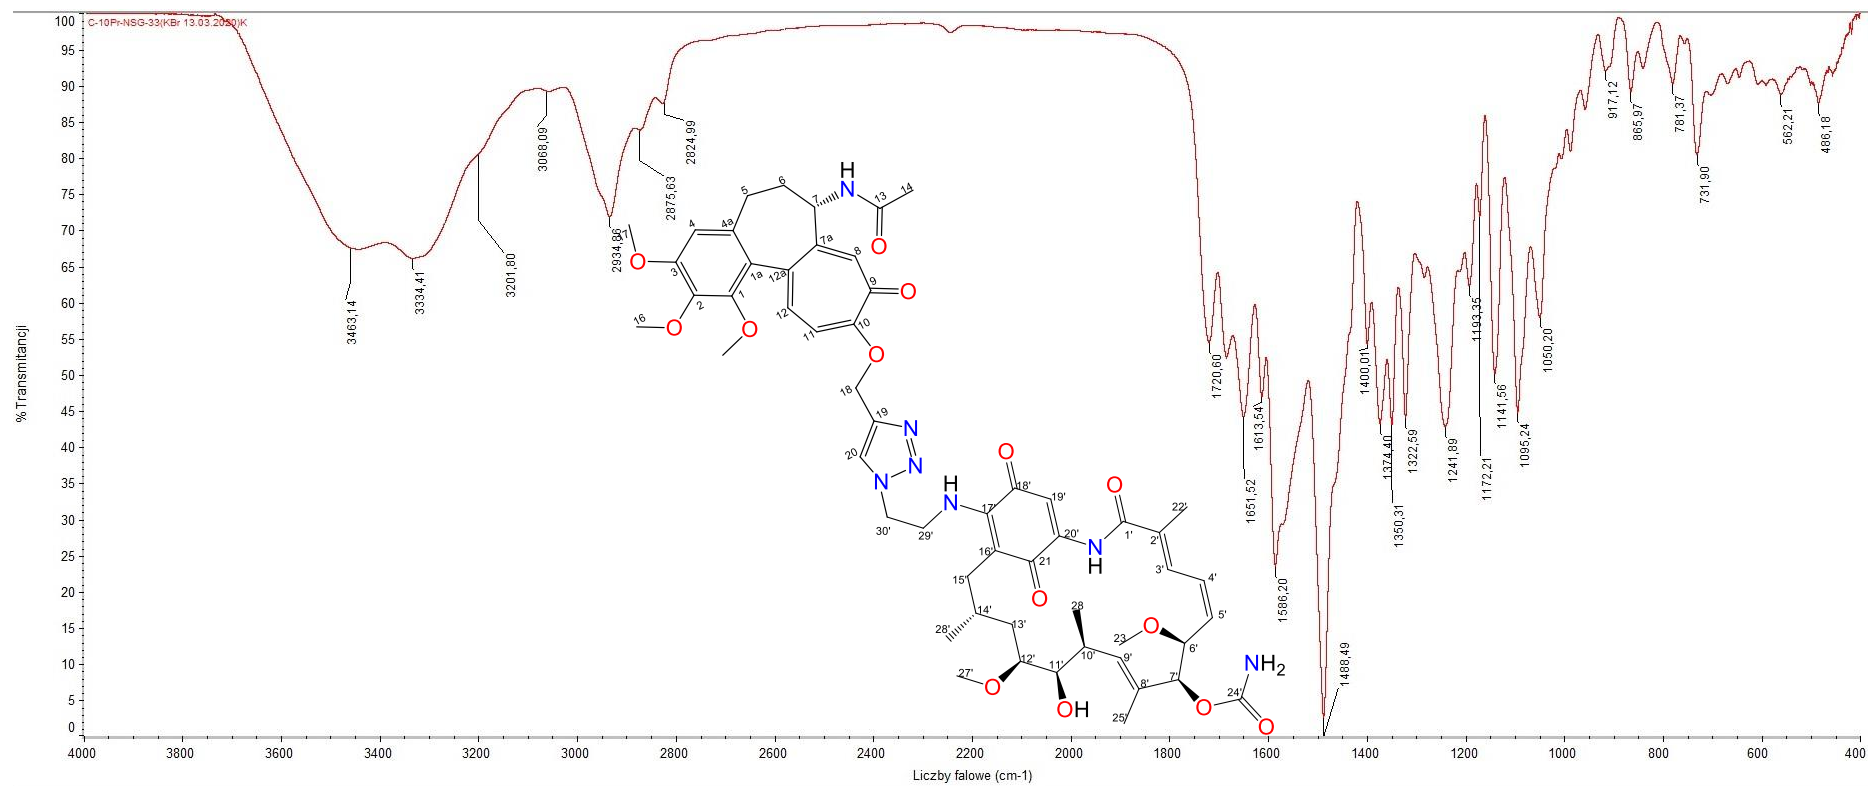

**Figure 39S.** FT-IR spectrum of compound **6f** (in KBr).

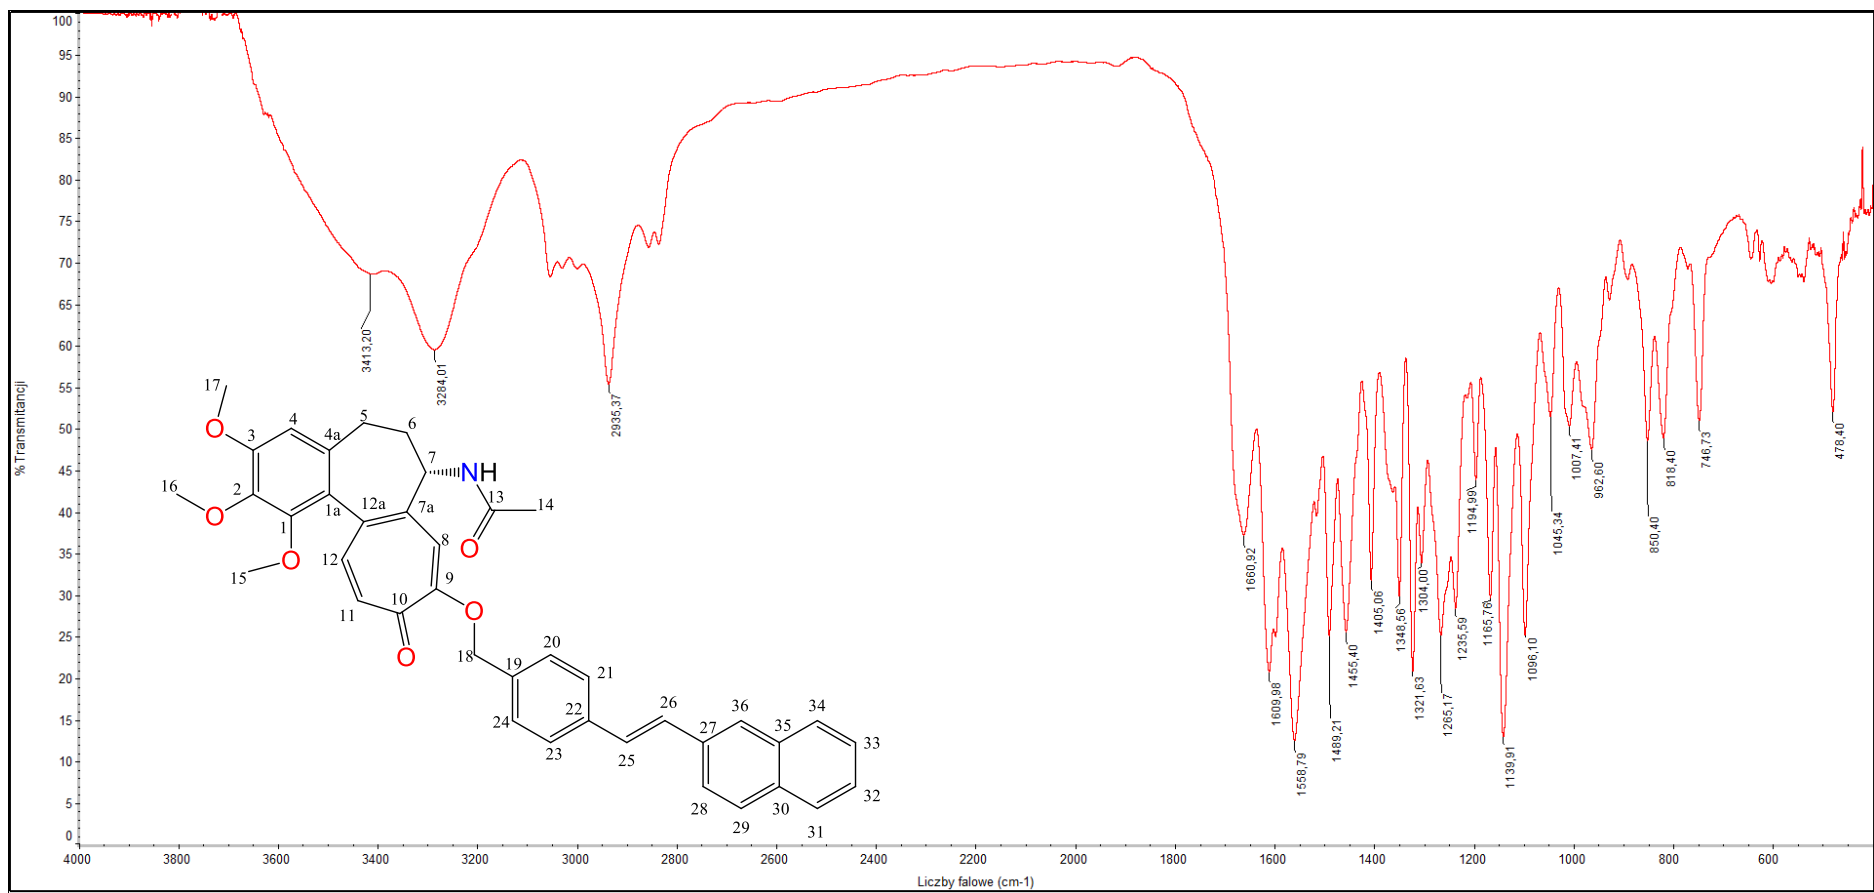

**Figure 40S.** FT-IR spectrum of compound **7a** (in KBr).

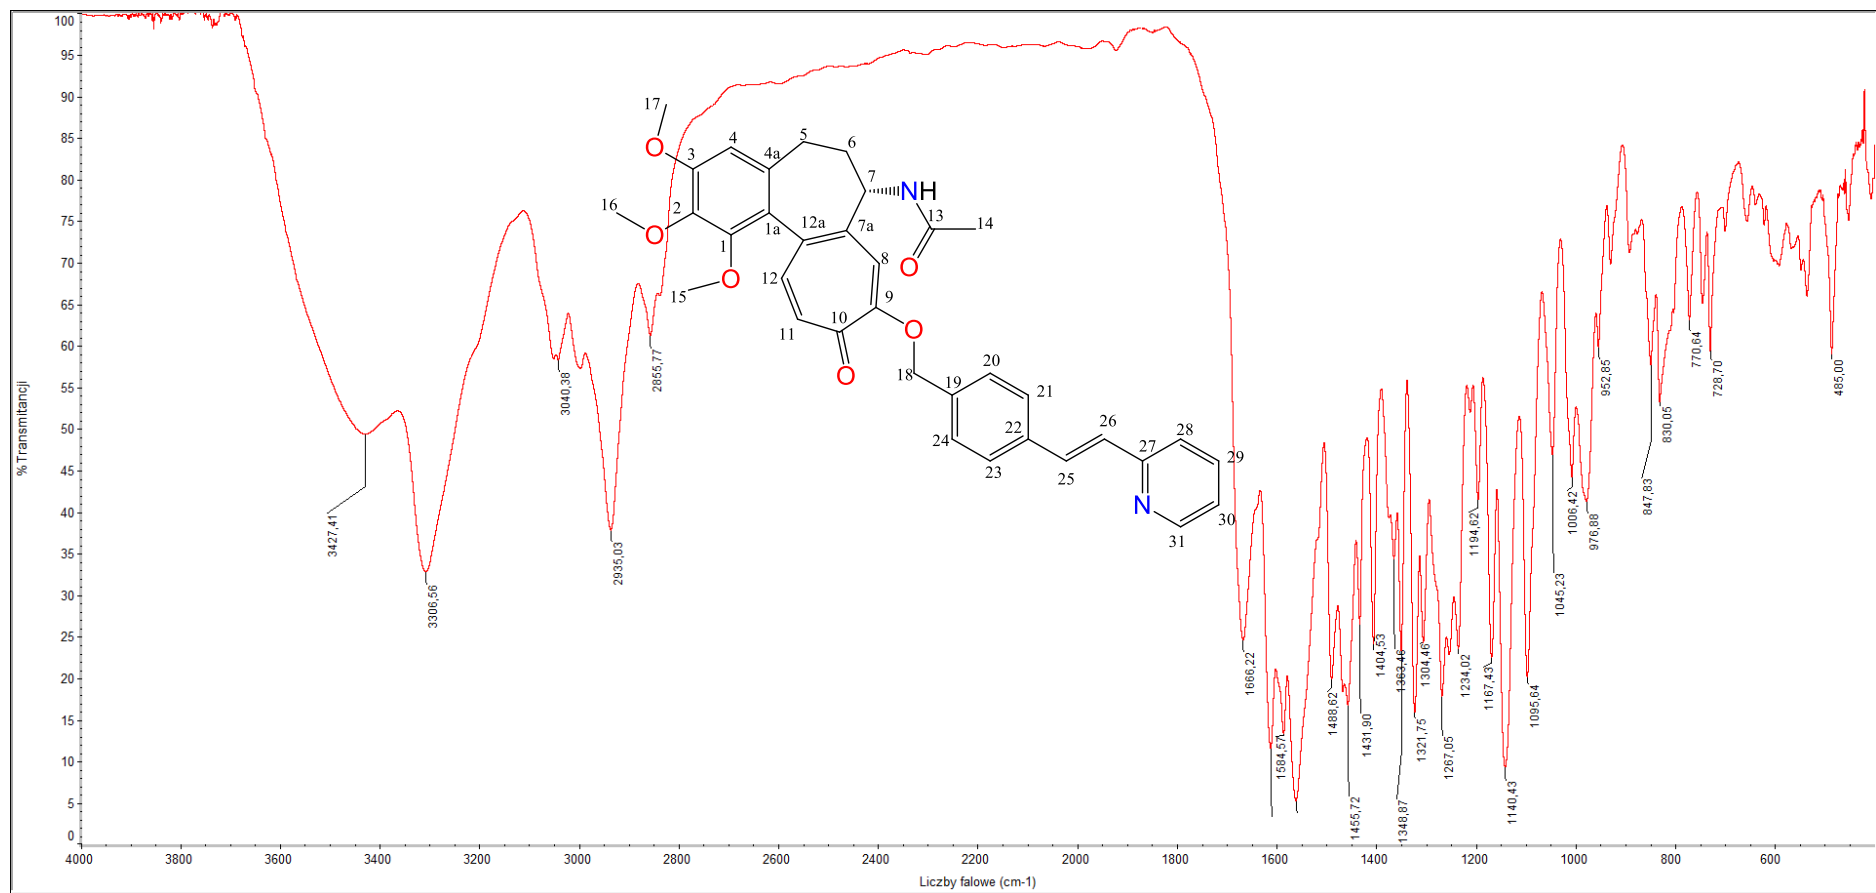

**Figure 41S.** FT-IR spectrum of compound **7b** (in KBr).

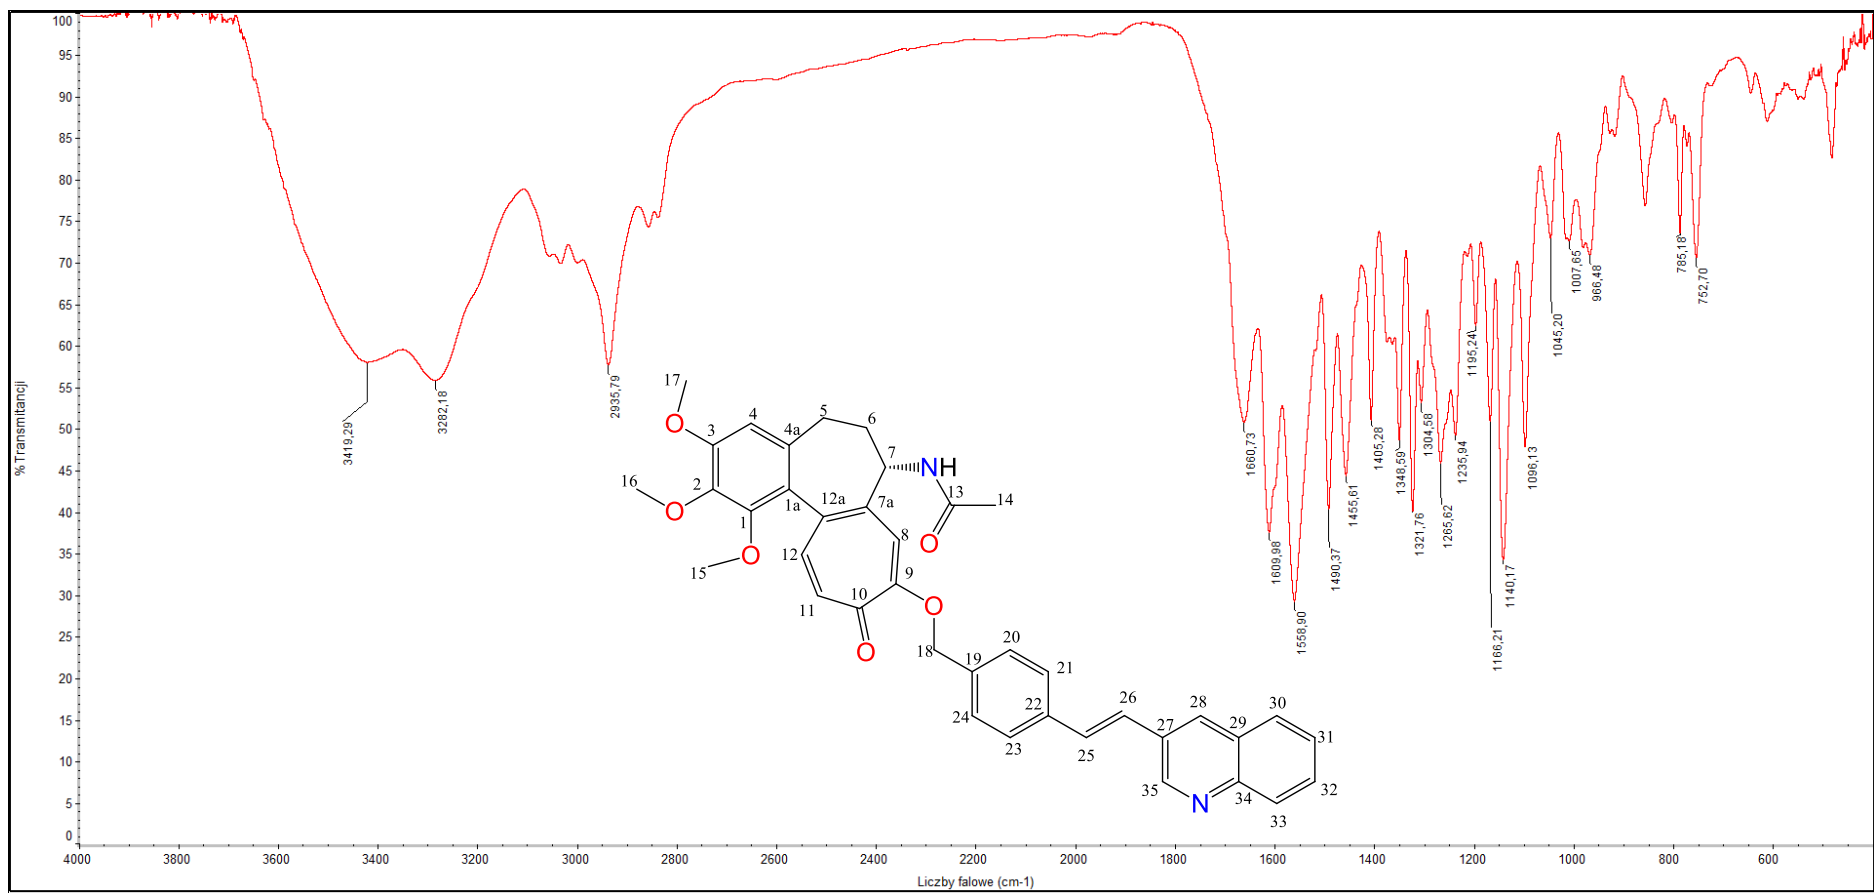

**Figure 42S.** FT-IR spectrum of compound **7c** (in KBr).



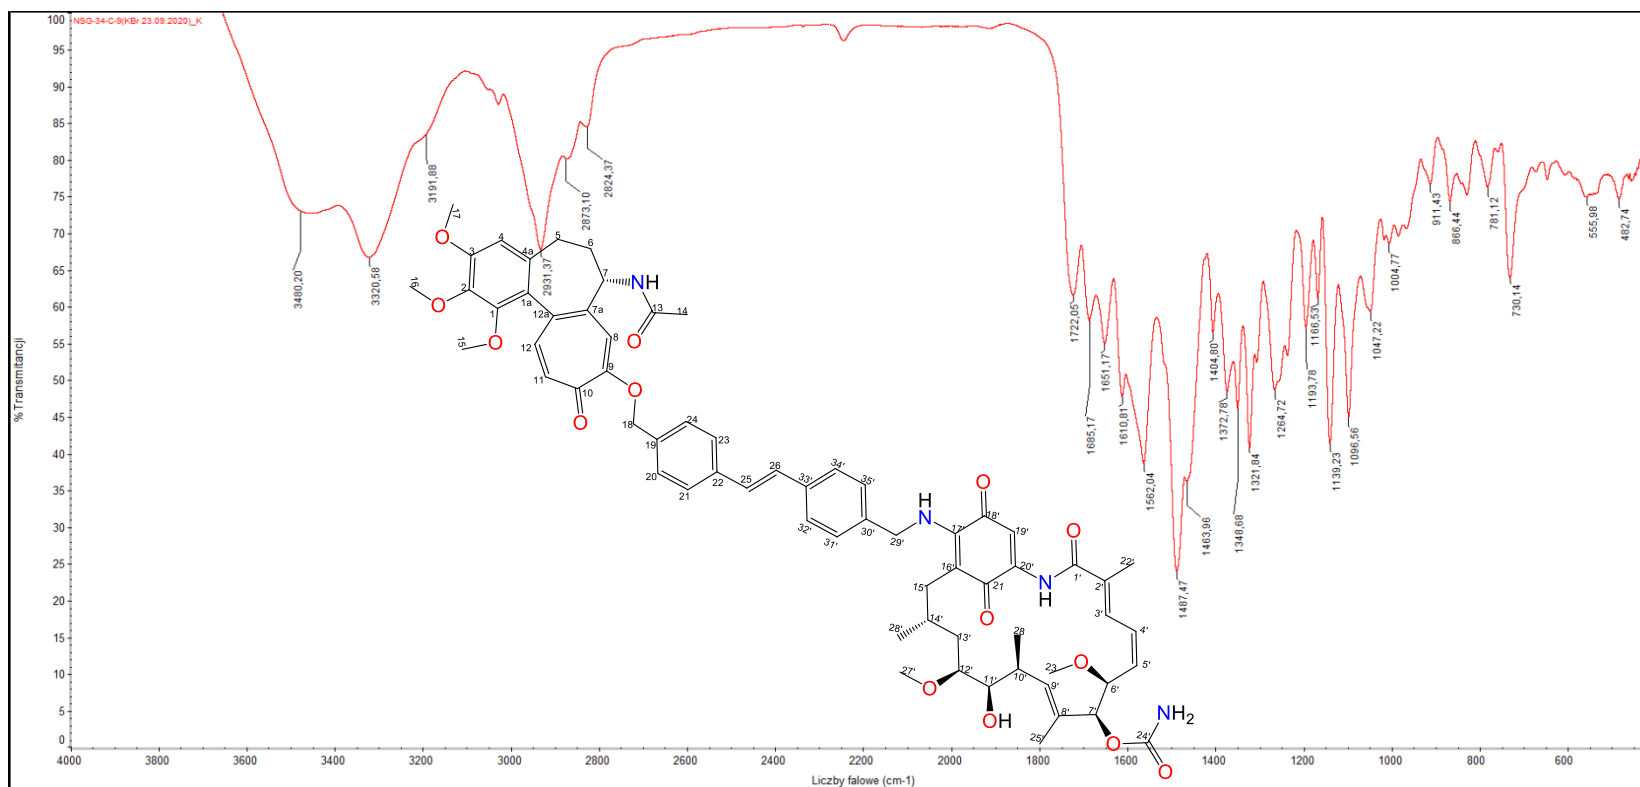

**Figure 43S.** FT-IR spectrum of compound **7d** (in KBr).

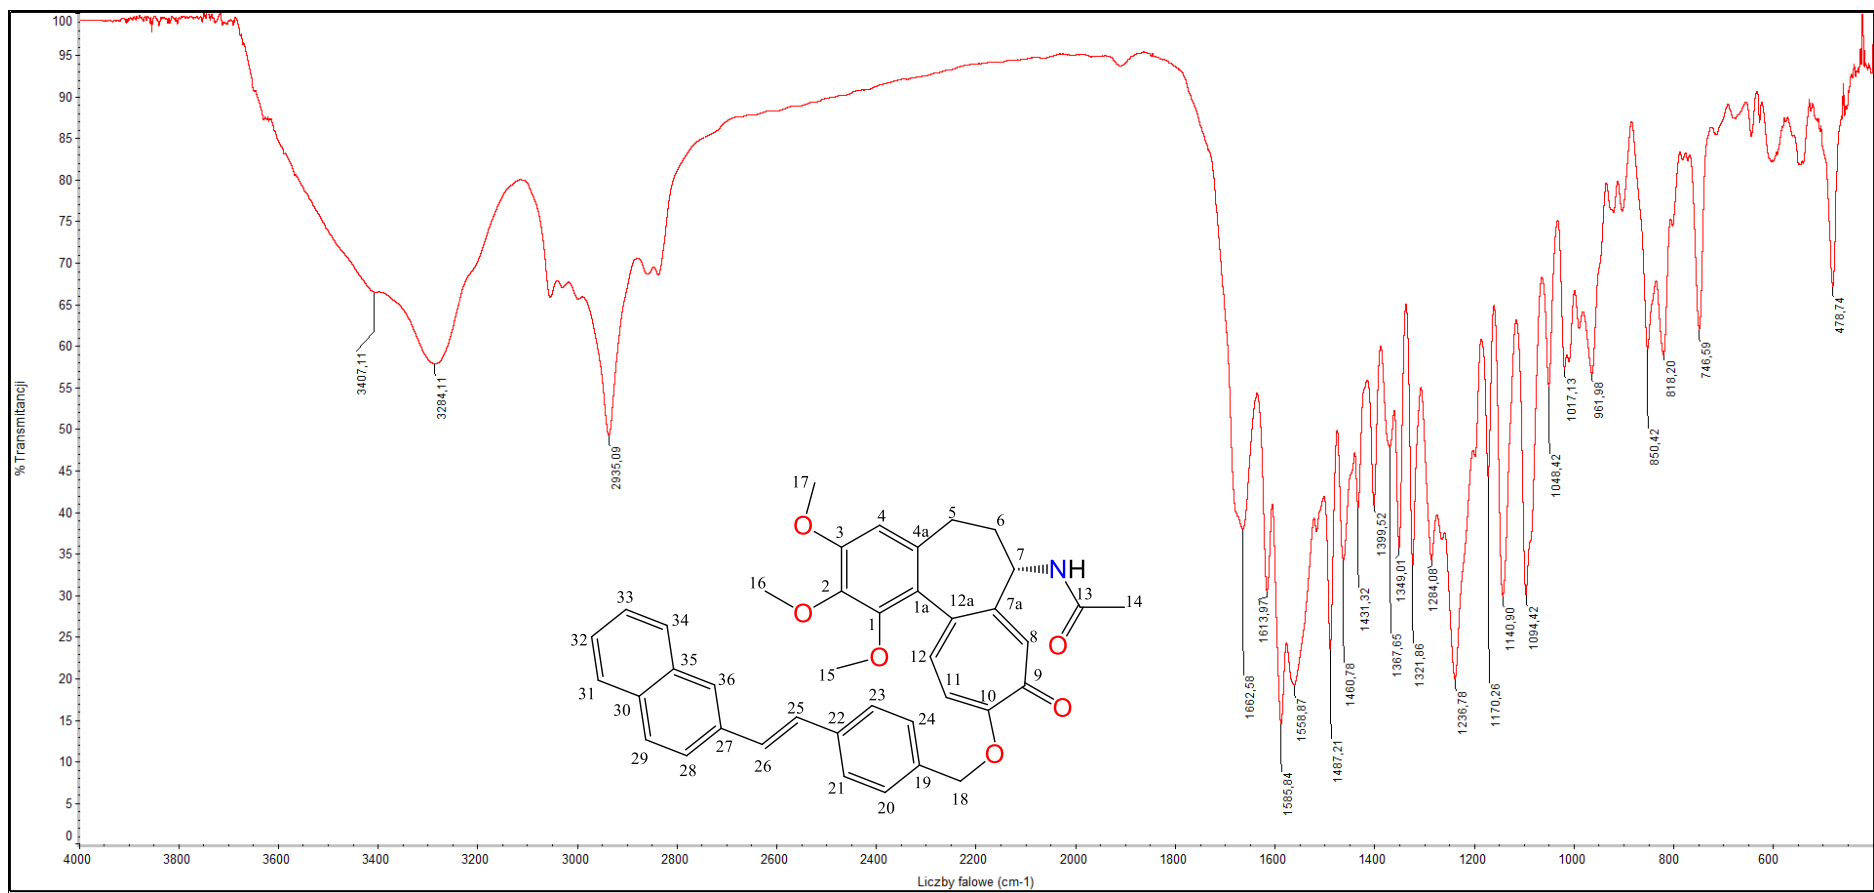

**Figure 44S.** FT-IR spectrum of compound **8a** (in KBr).

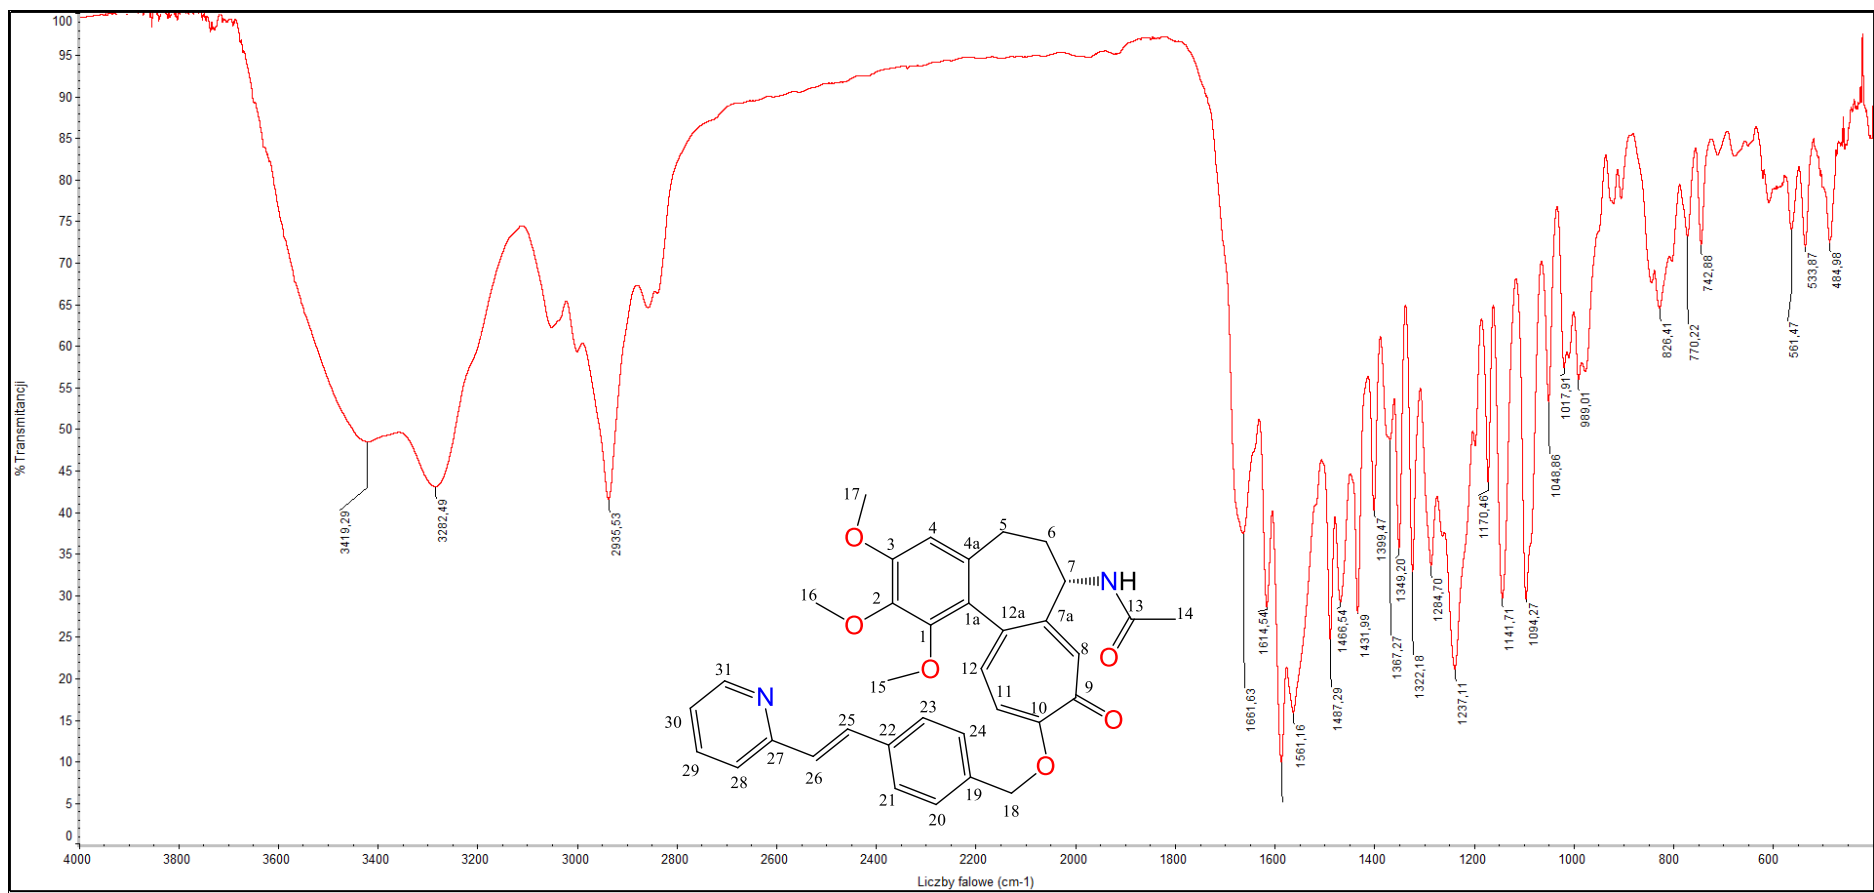

**Figure 45S.** FT-IR spectrum of compound **8b** (in KBr).

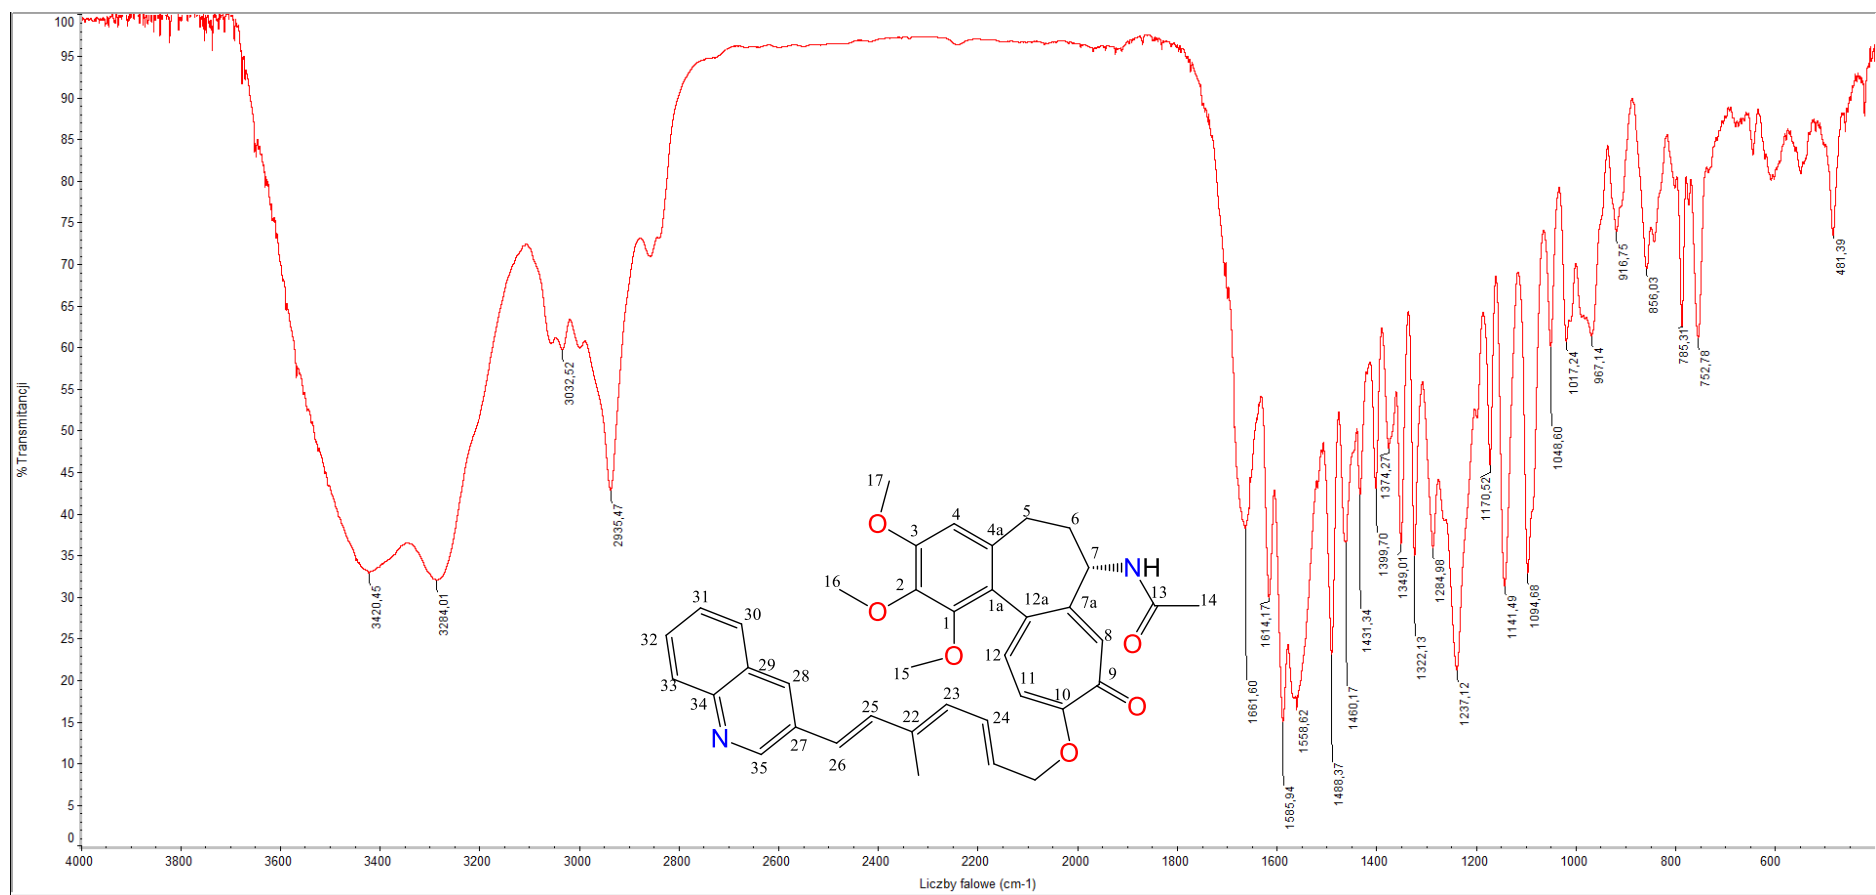

**Figure 46S.** FT-IR spectrum of compound **8c** (in KBr).

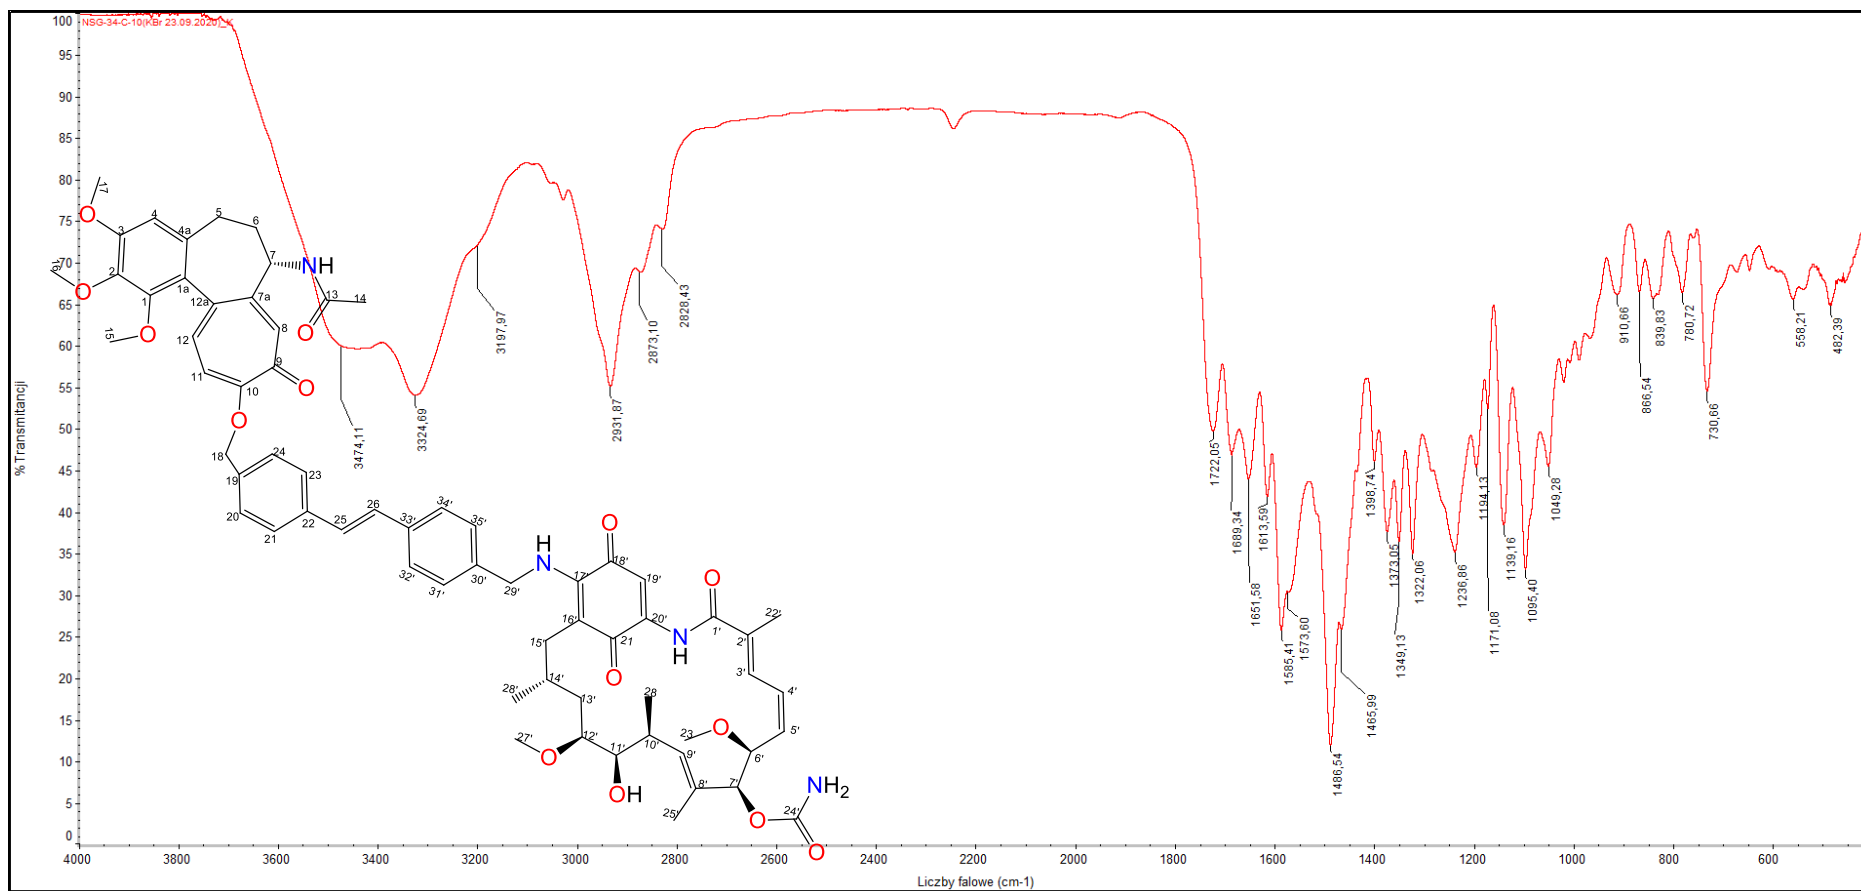

**Figure 47S.** FT-IR spectrum of compound **8d** (in KBr).

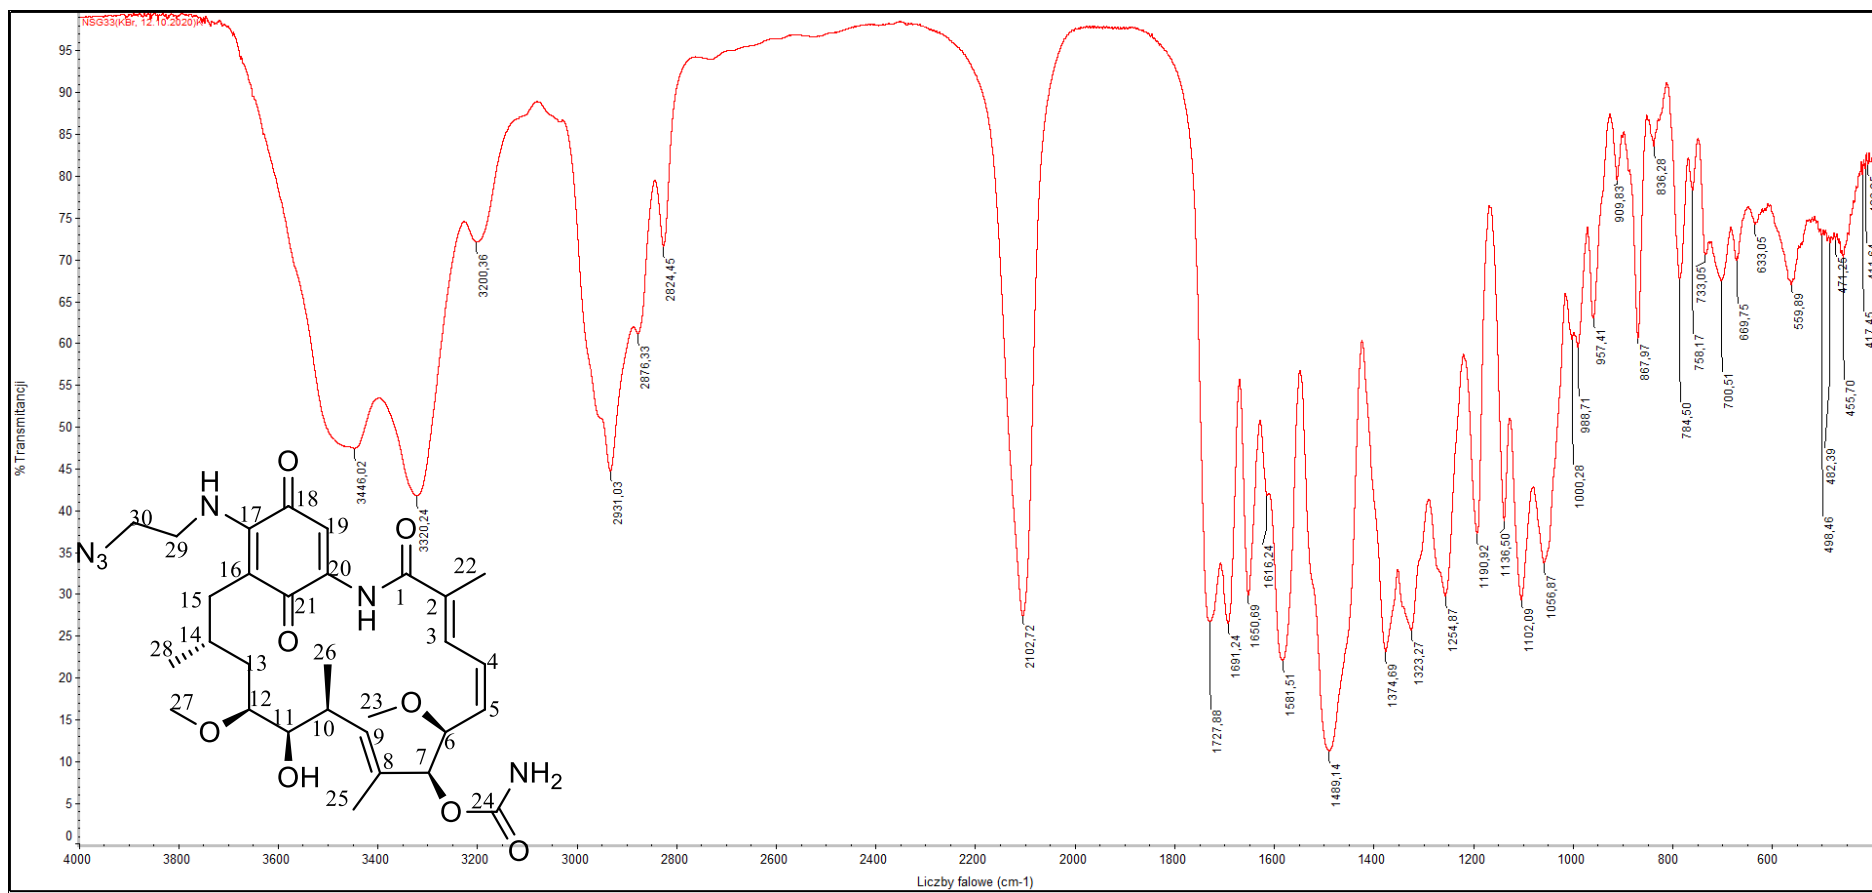

Figure 48S. FT-IR spectrum of compound 9 (in KBr).

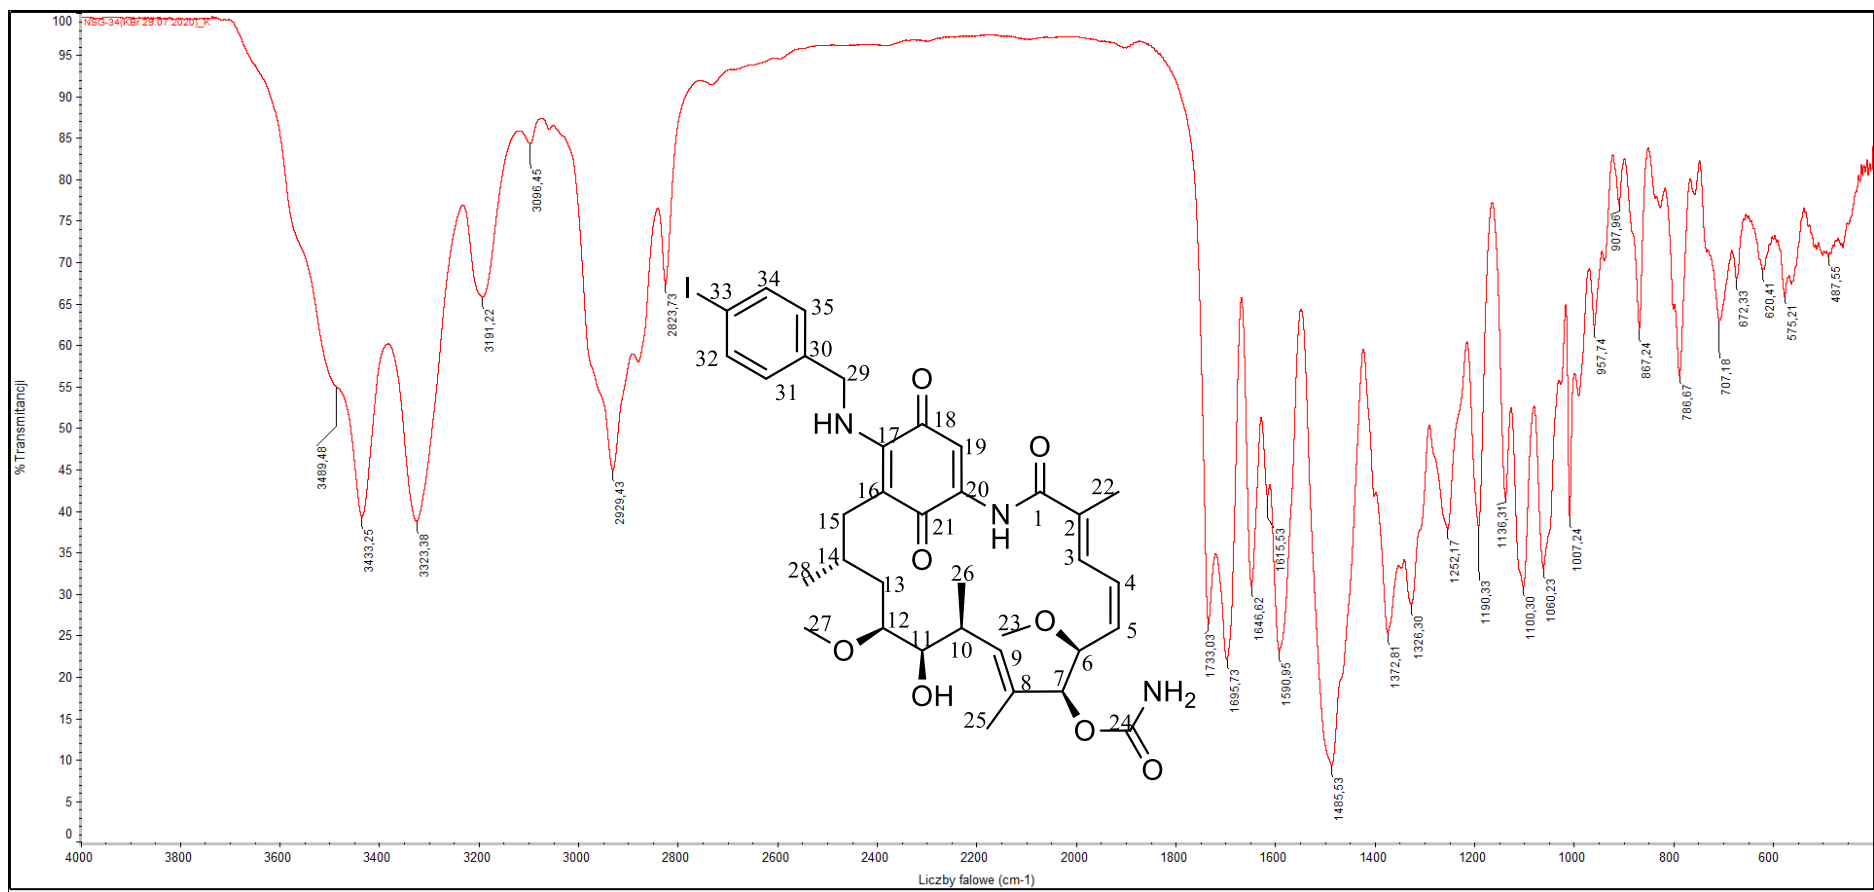

Figure 49S. FT-IR spectrum of compound 10 (in KBr).

**NMR spectra**



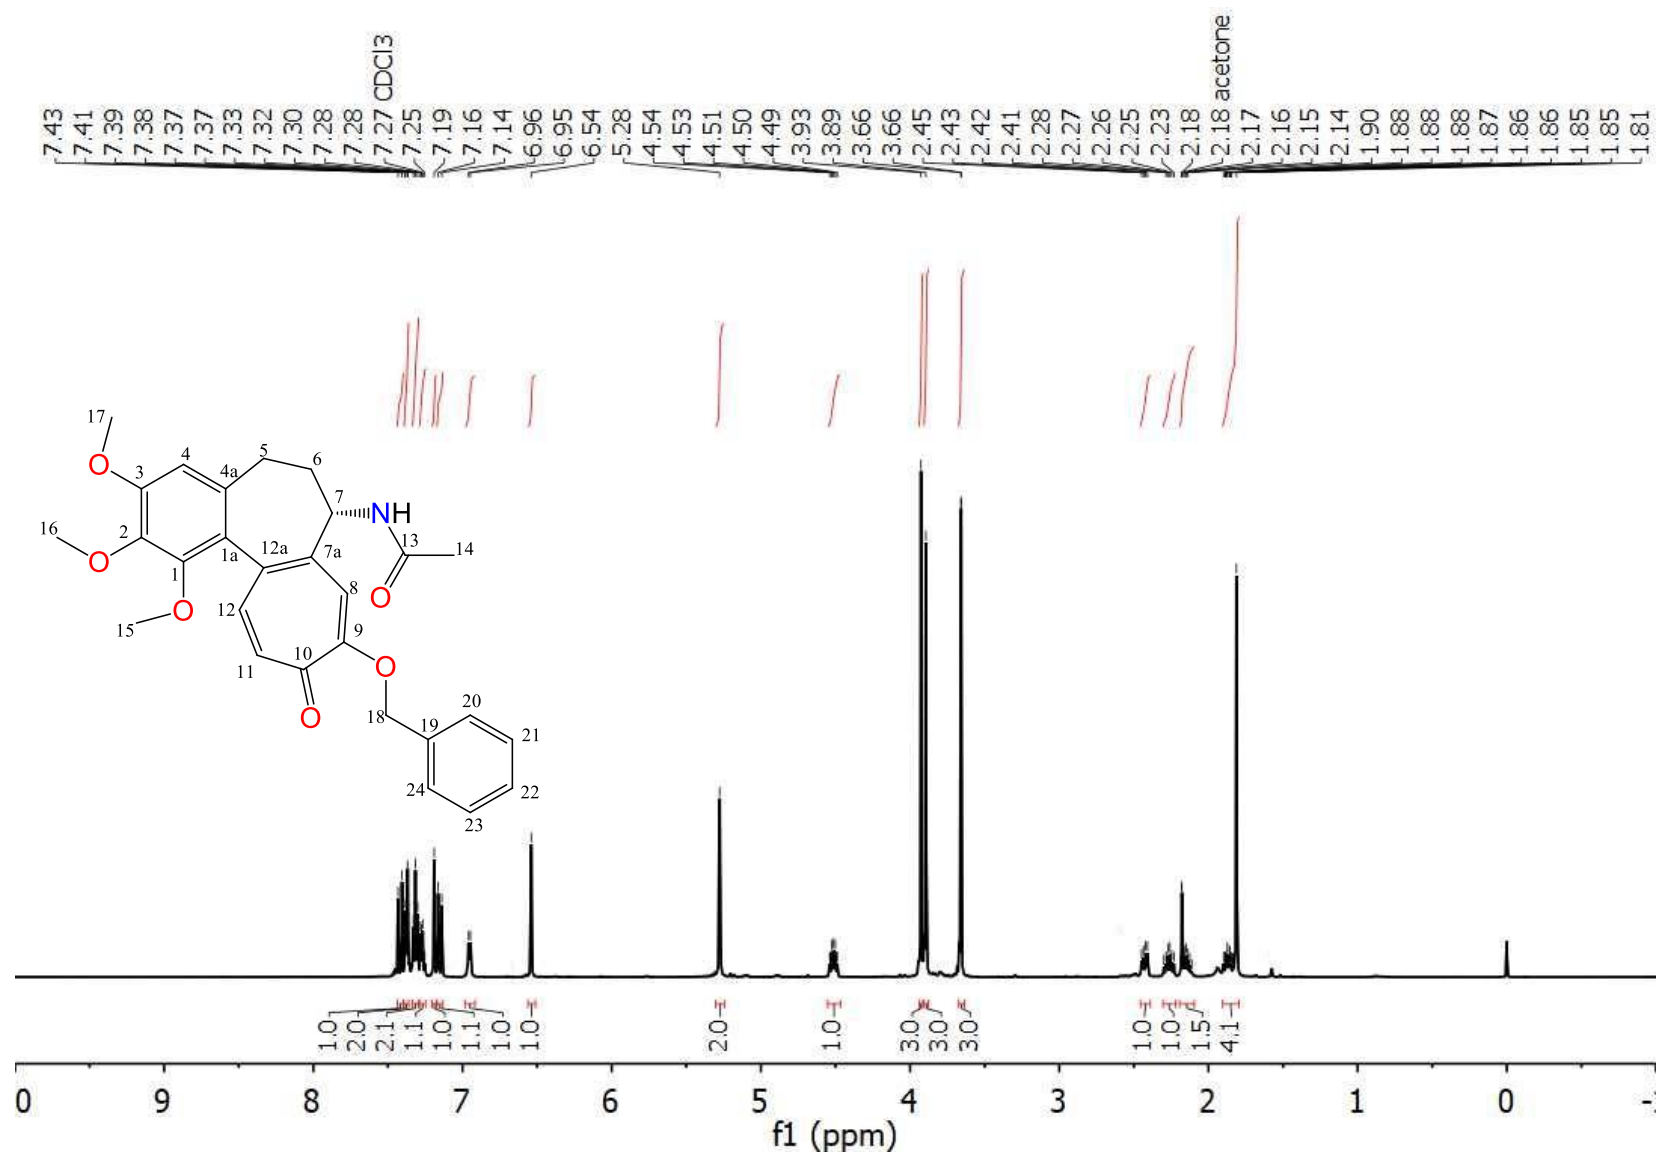

Figure 50S. <sup>1</sup>H NMR spectrum of compound 3a in CDCl<sub>3</sub>.

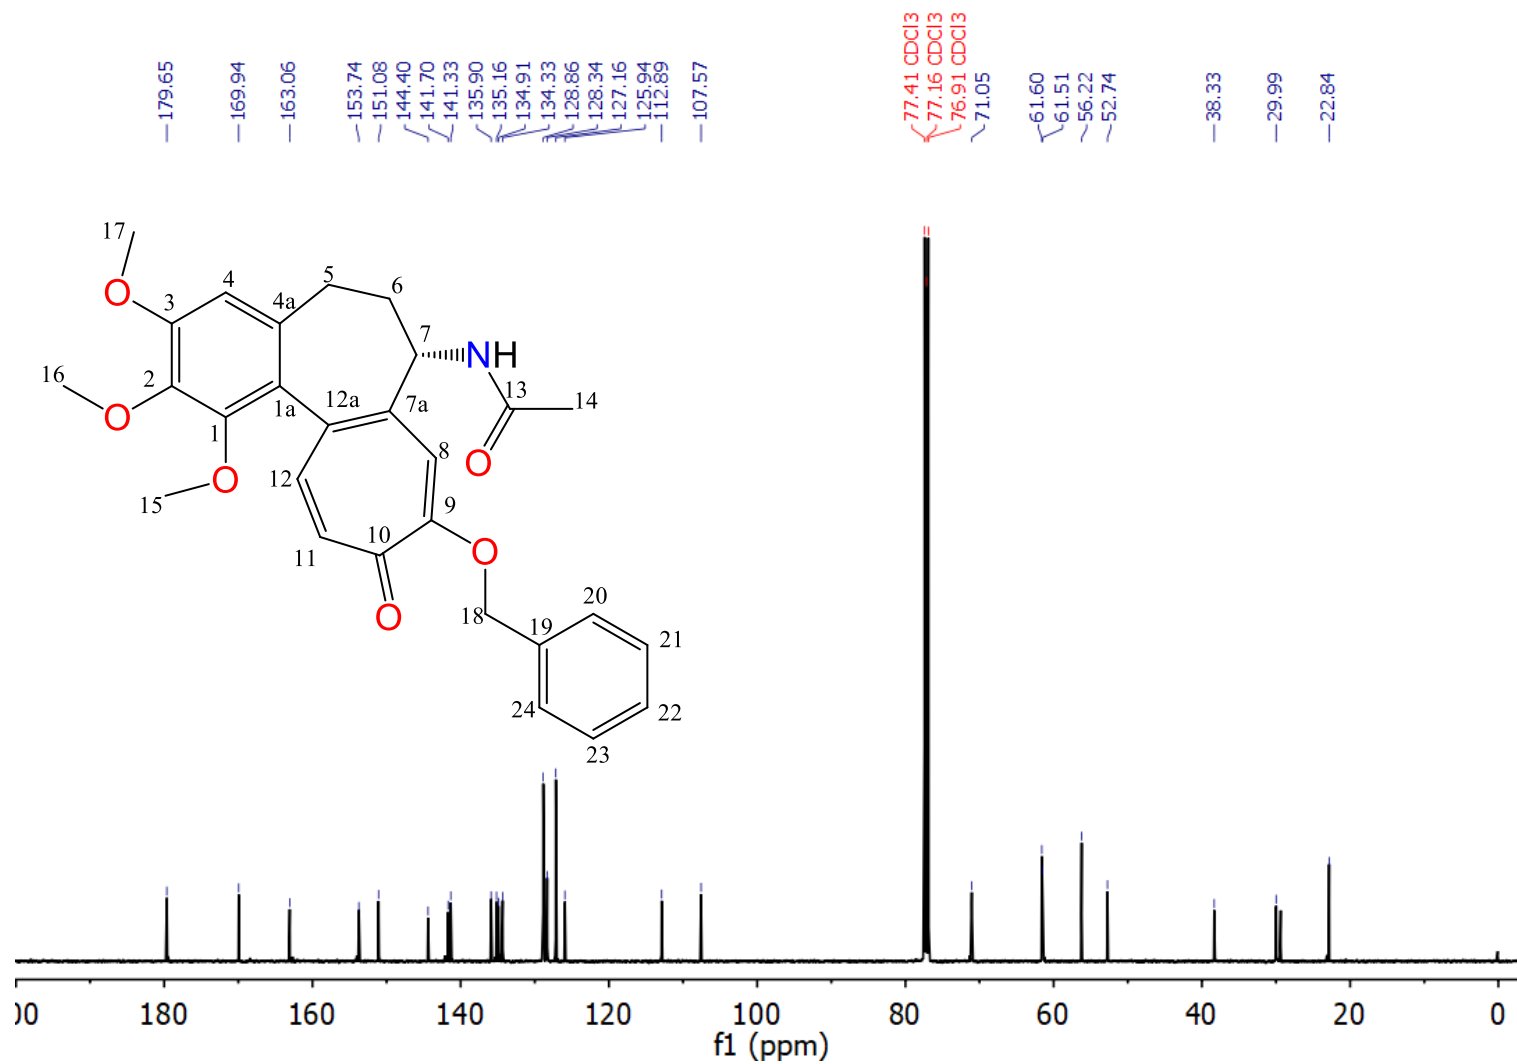

**Figure 51S.**  $^{13}\text{C}$  NMR spectrum of compound **3a** in  $\text{CDCl}_3$ .



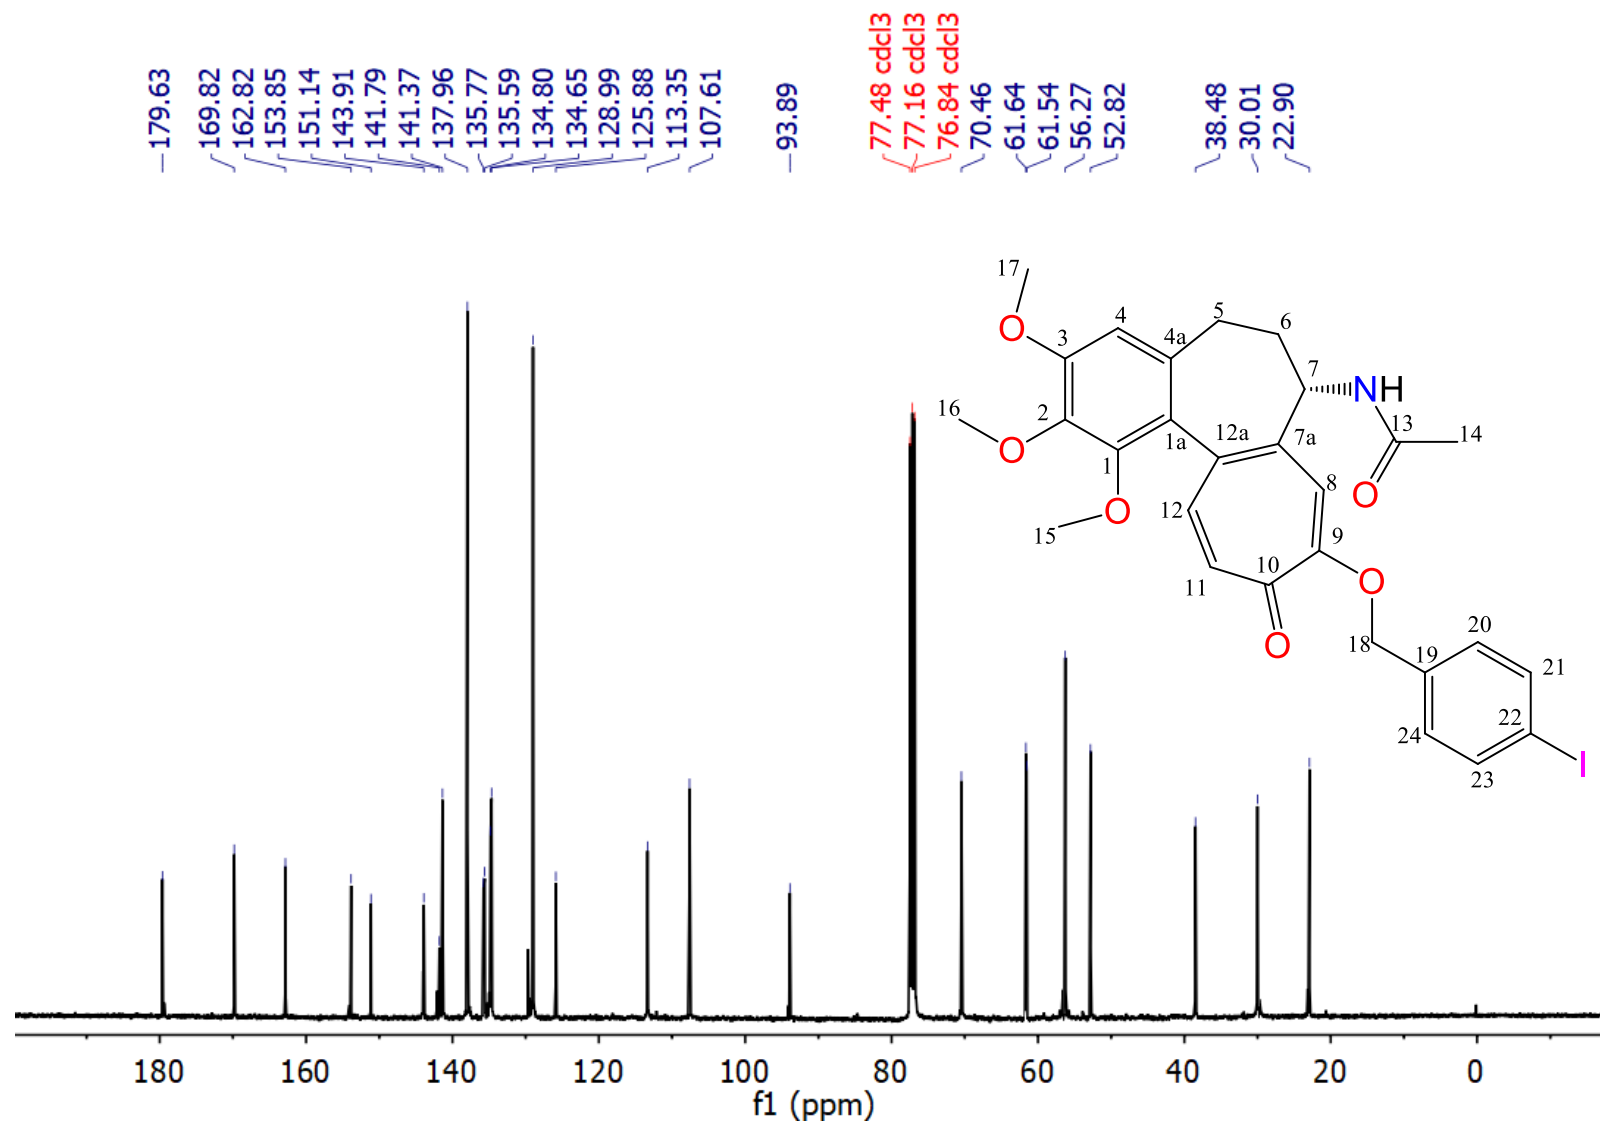

Figure 53S.  $^{13}\text{C}$  NMR spectrum of compound **3b** in  $\text{CDCl}_3$

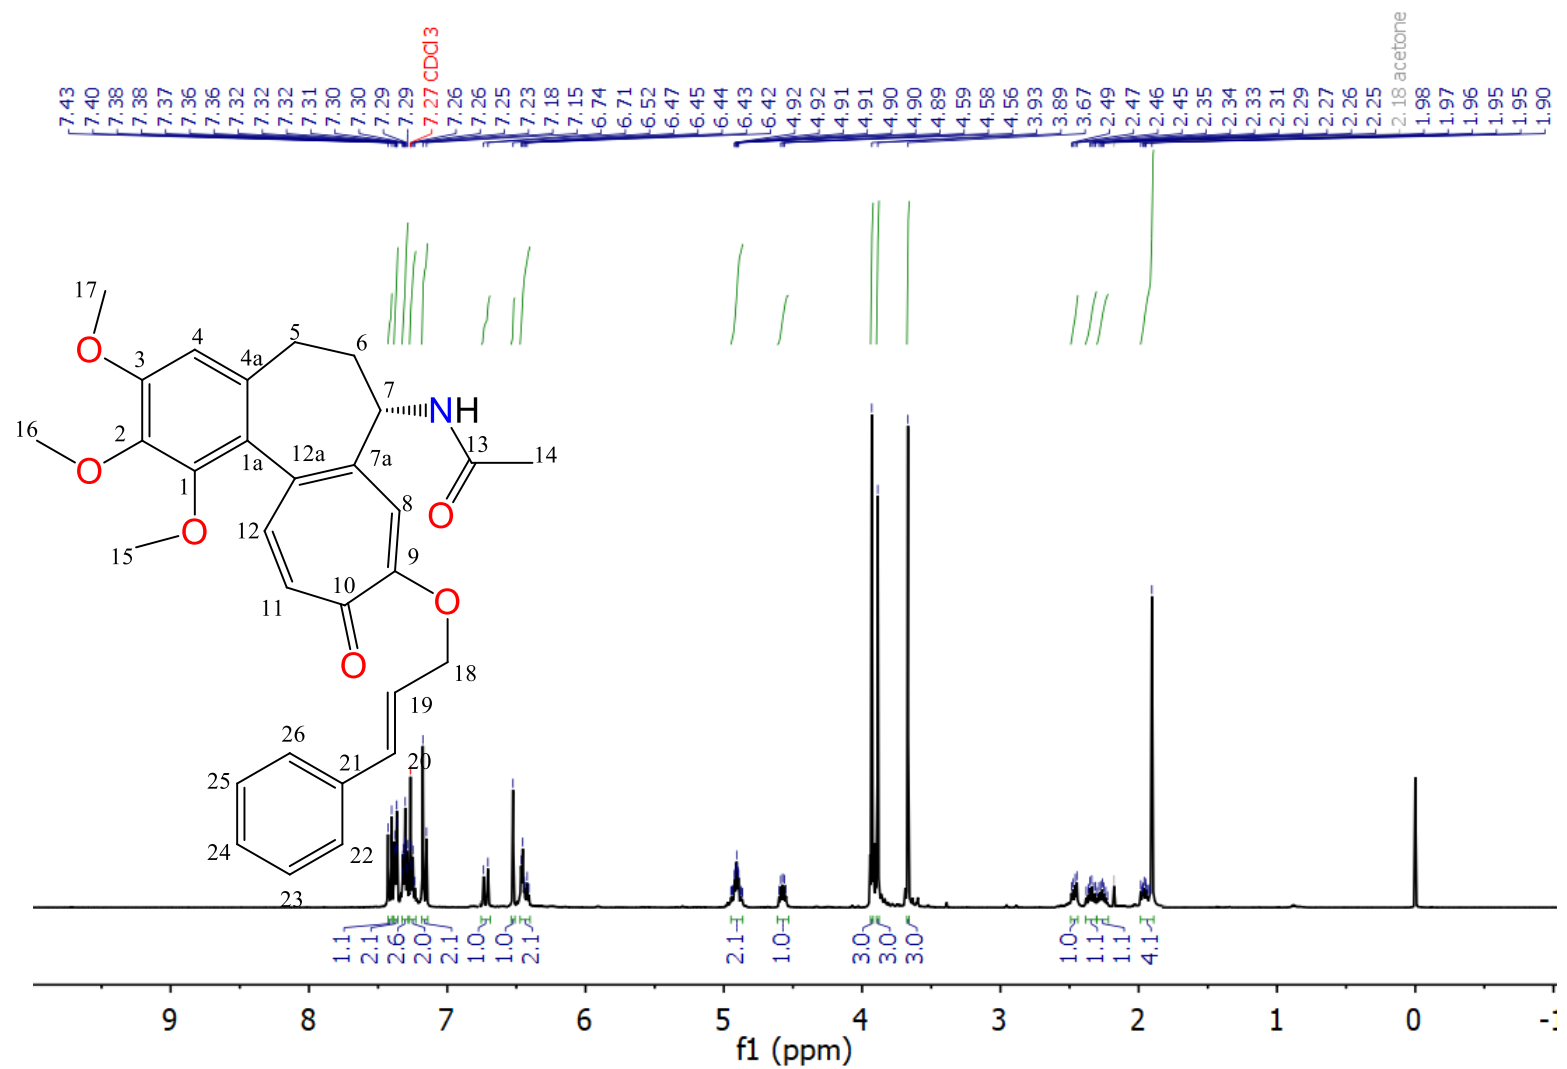

Figure 54S. <sup>1</sup>H NMR spectrum of compound **3c** in CDCl<sub>3</sub>.

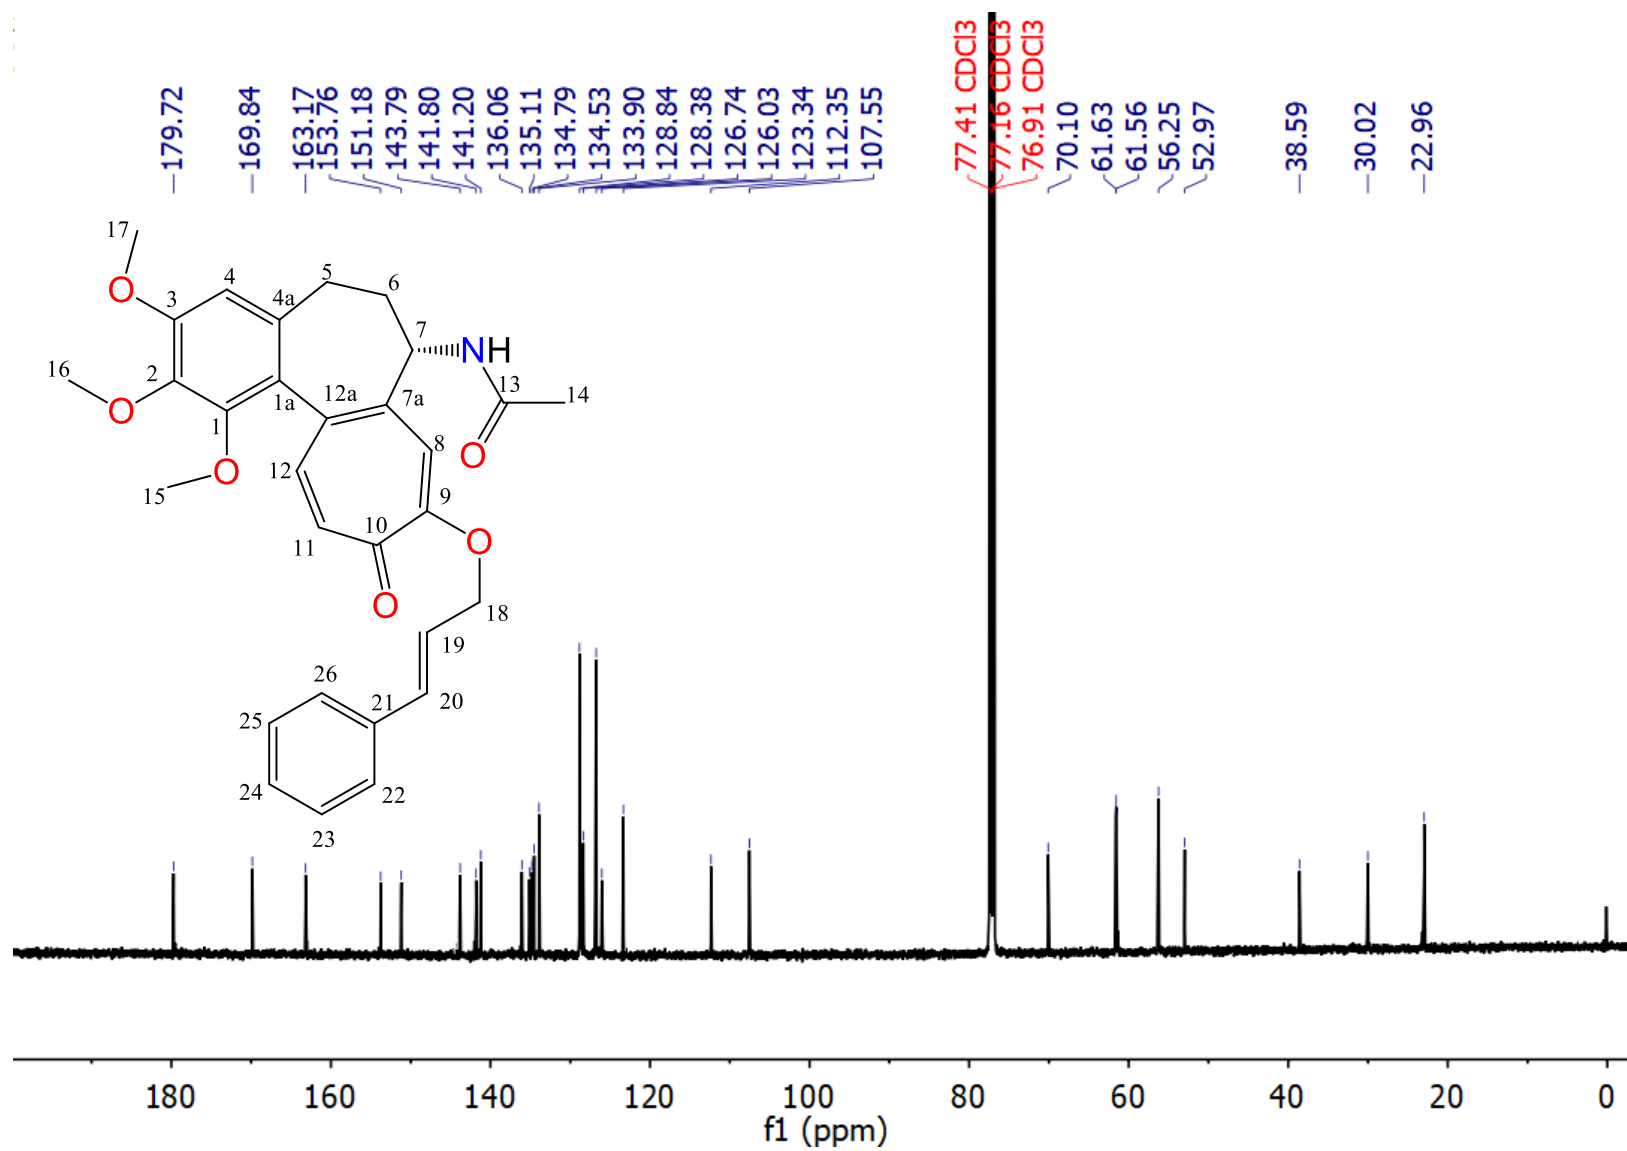

**Figure 55S.**  $^1\text{H}$  NMR spectrum of compound **3c** in  $\text{CDCl}_3$ .

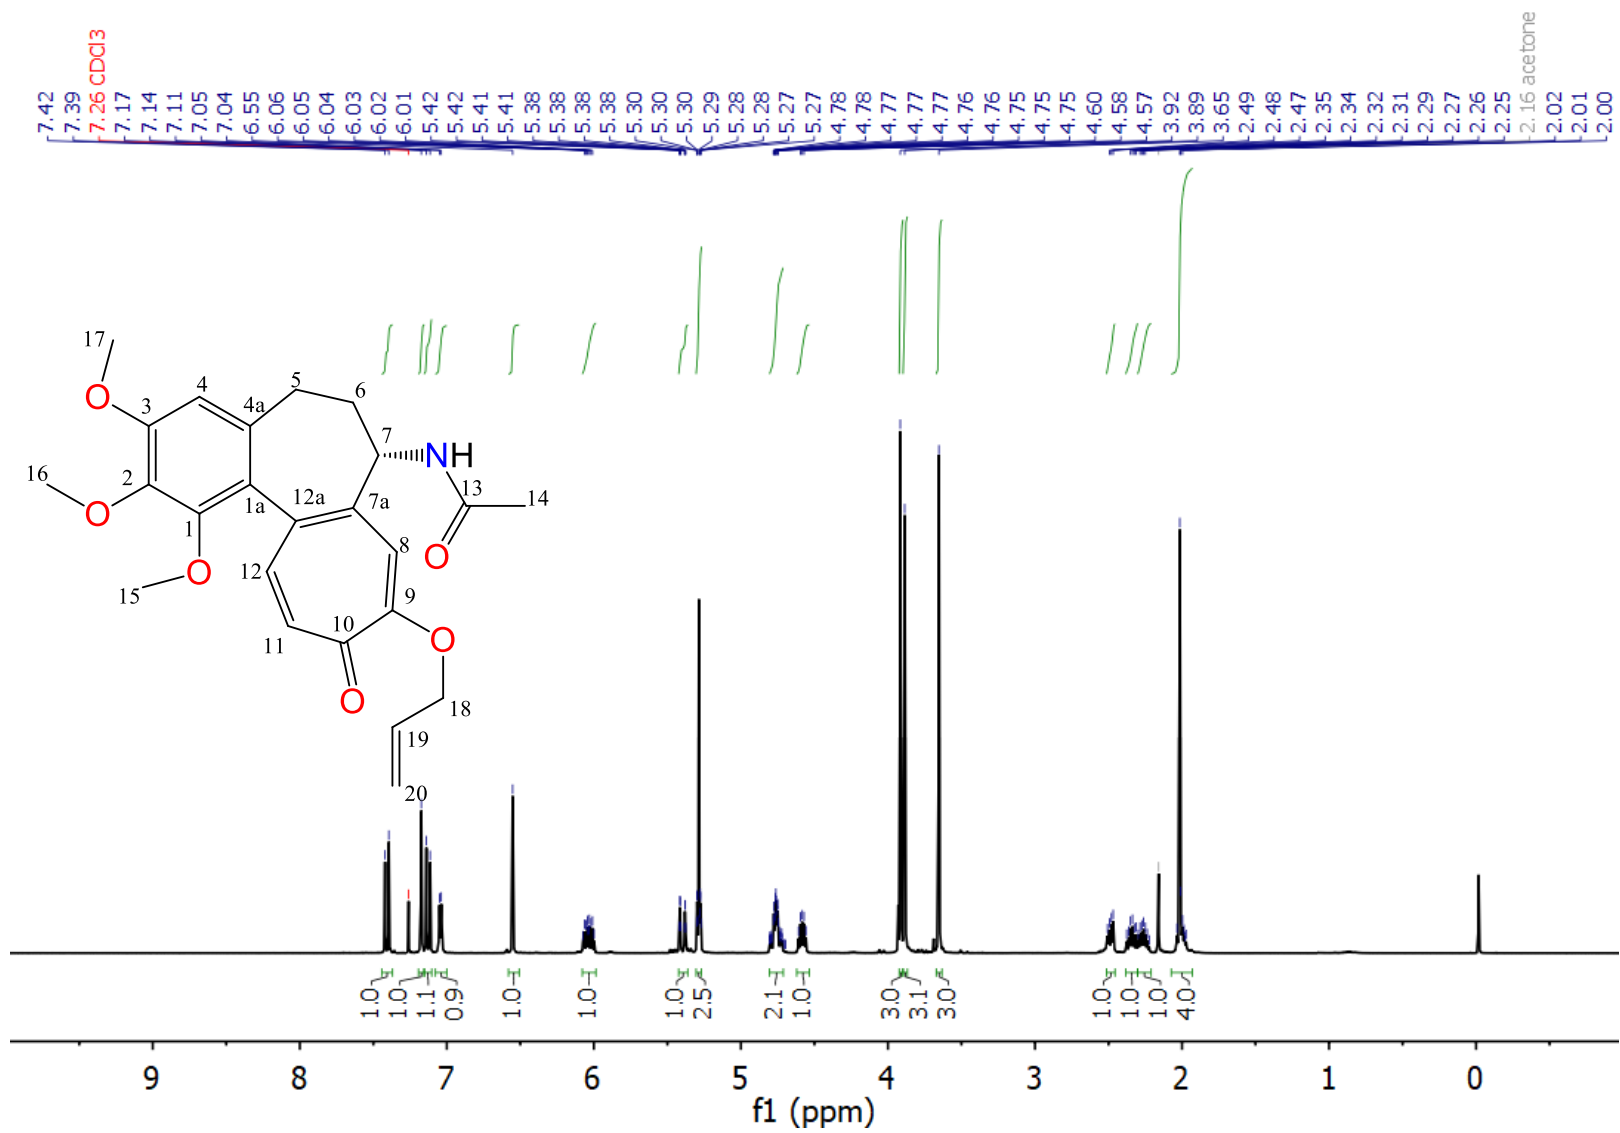

**Figure 56S.** <sup>1</sup>H NMR spectrum of compound **3d** in CDCl<sub>3</sub>.

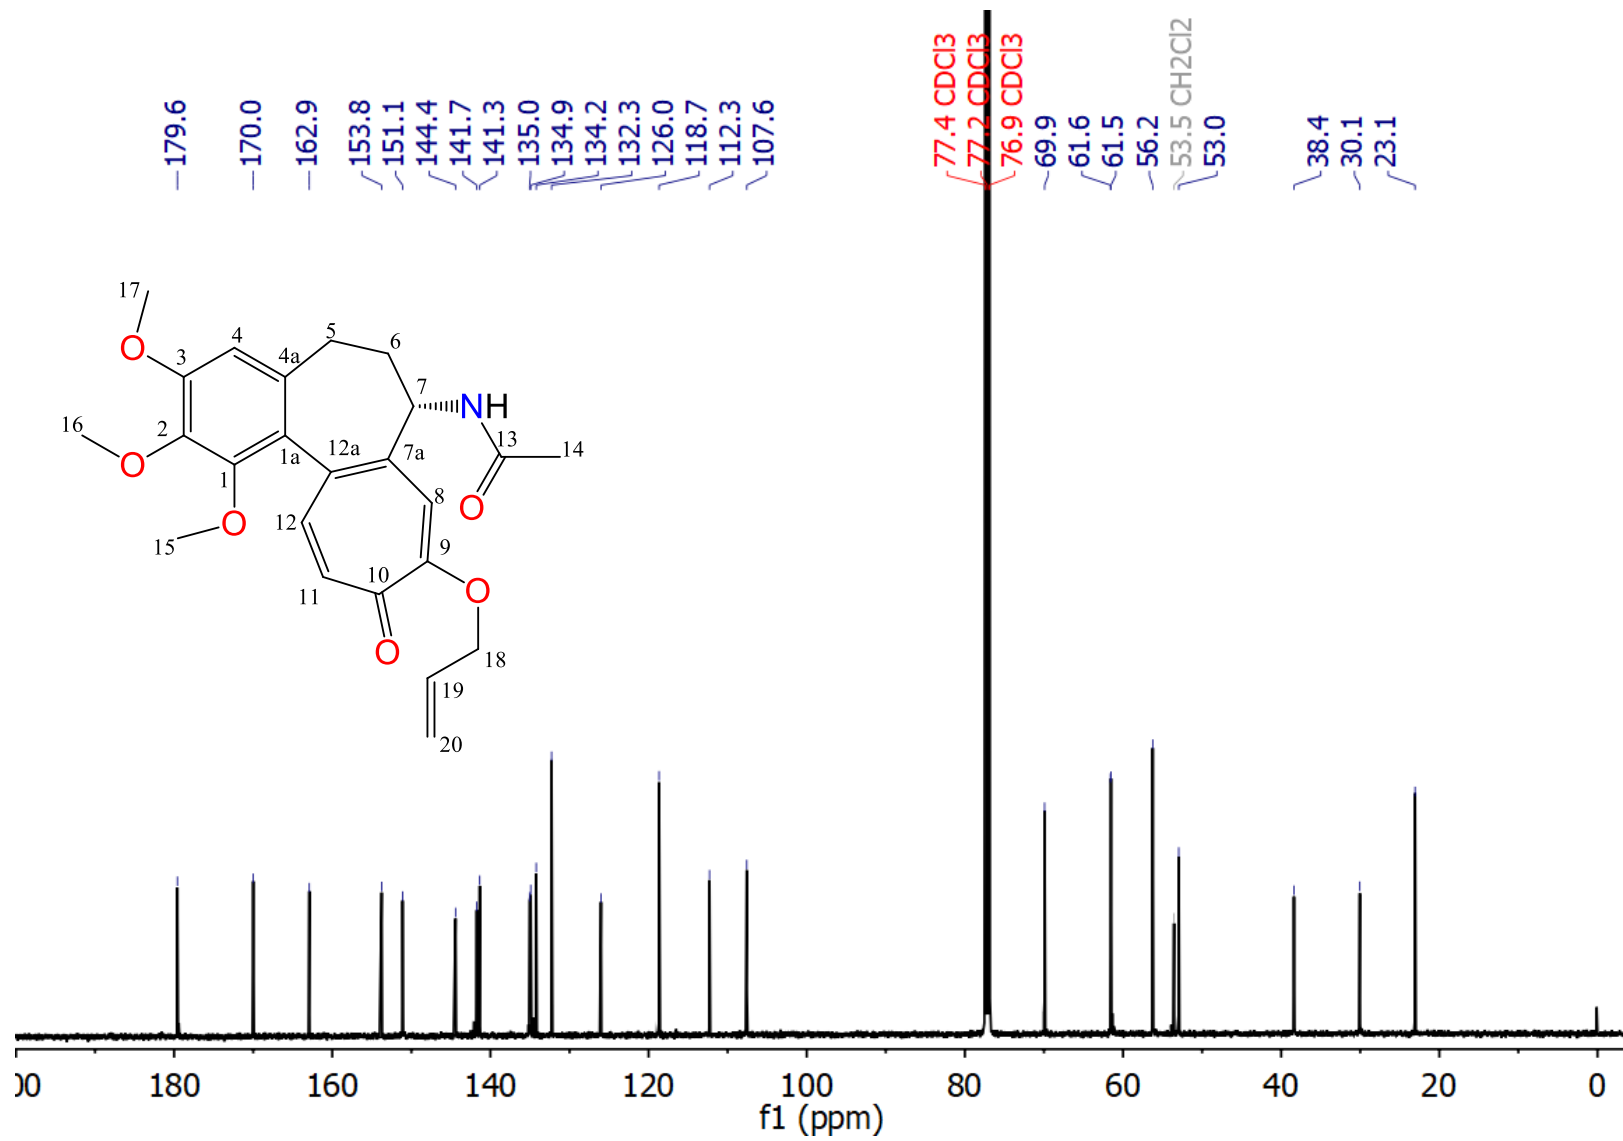

**Figure 57S.** <sup>1</sup>H NMR spectrum of compound **3d** in CDCl<sub>3</sub>.



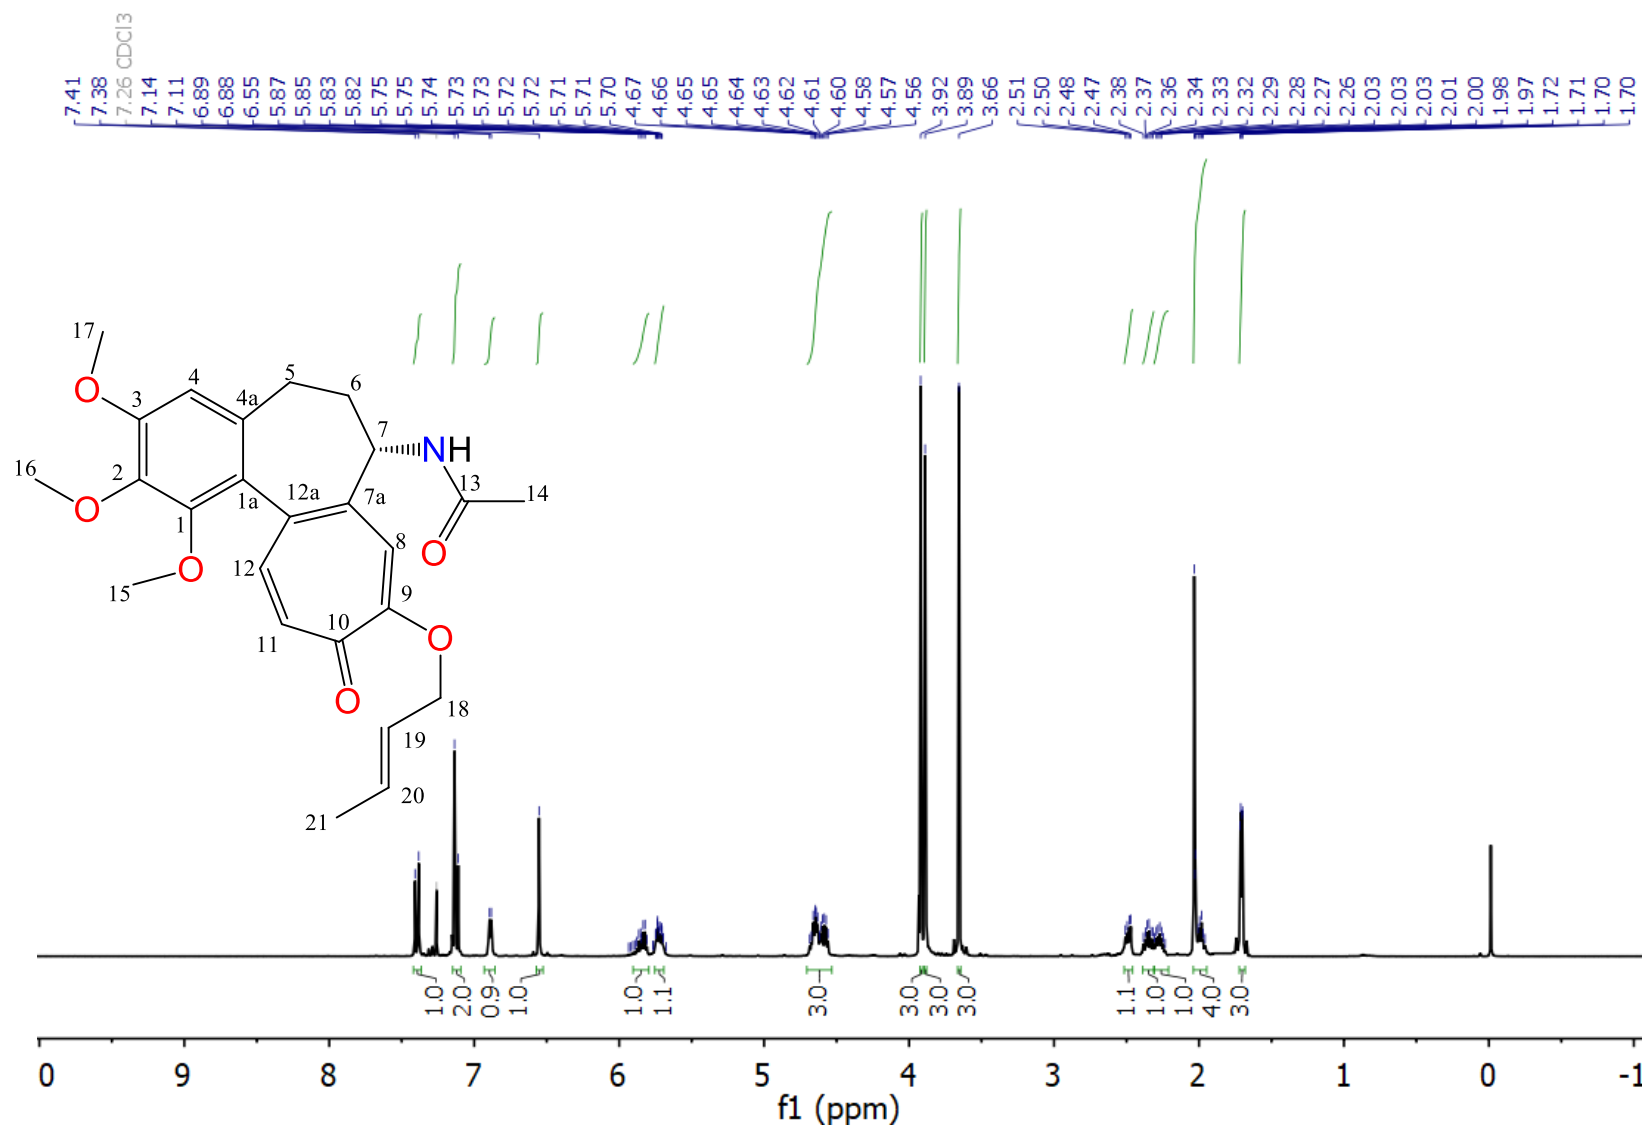

**Figure 58S.**  $^1\text{H}$  NMR spectrum of compound **3e** in  $\text{CDCl}_3$ .

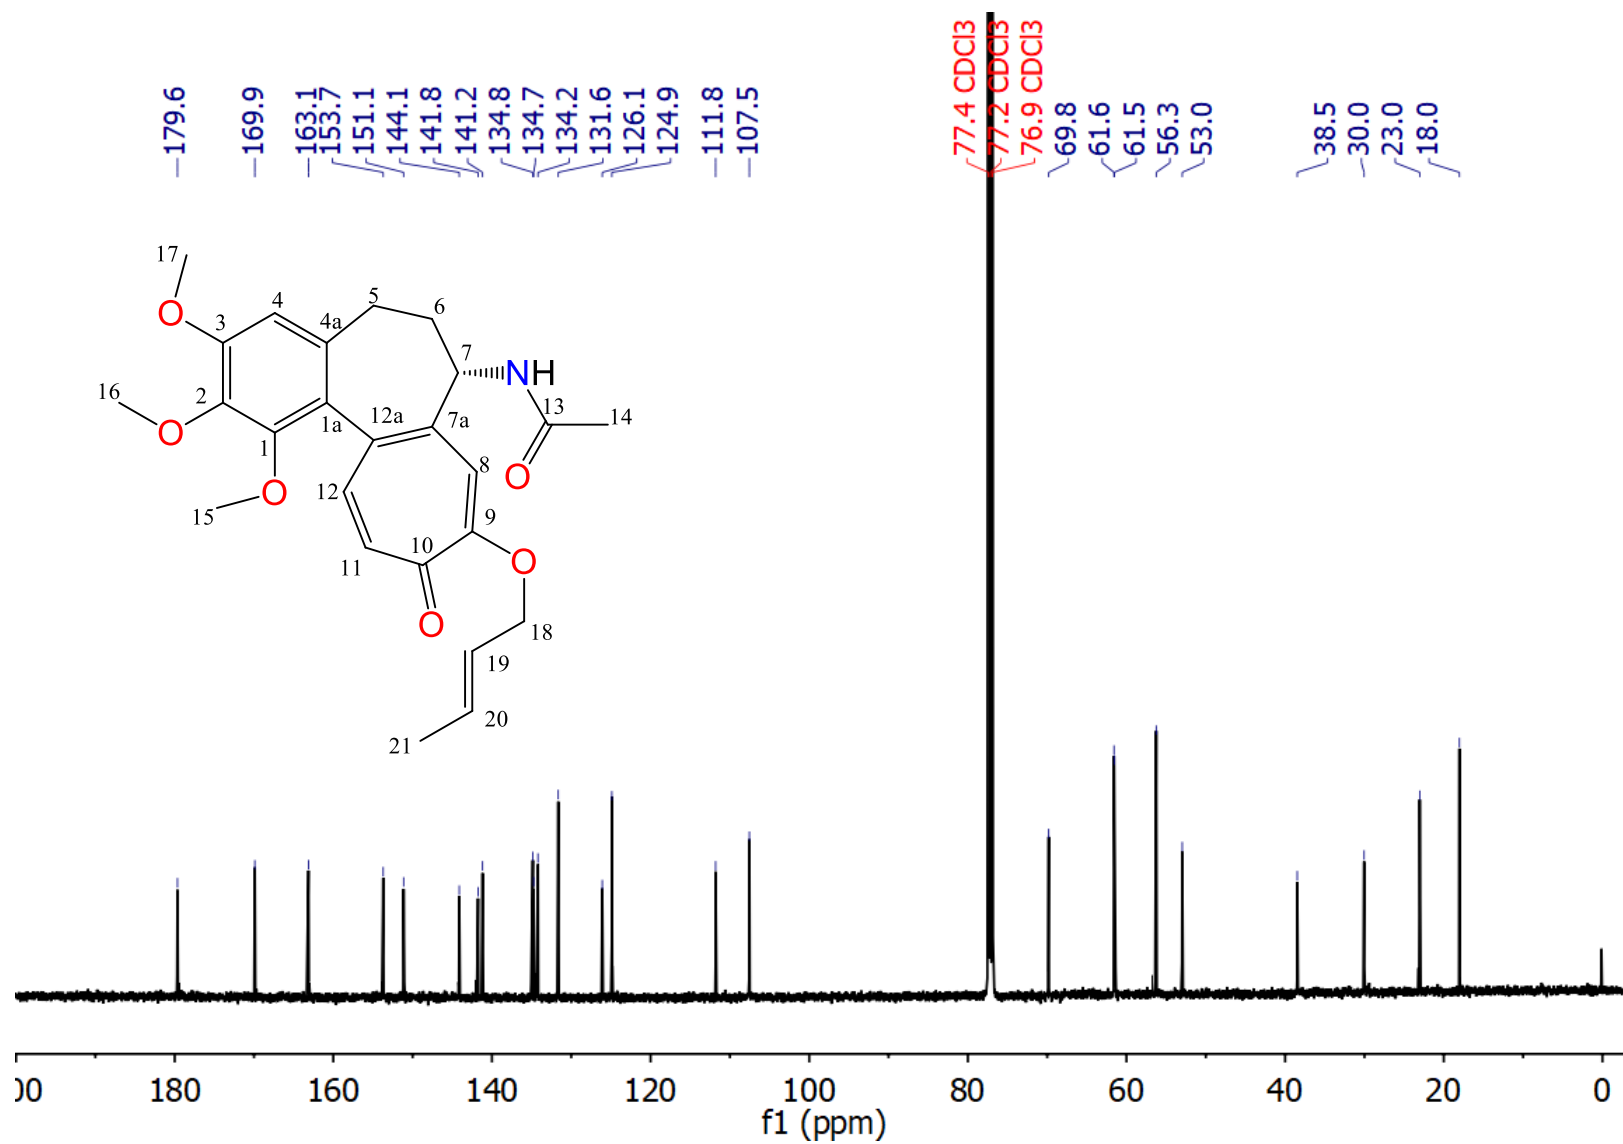

Figure 59S.  $^{13}\text{C}$  NMR spectrum of compound **3e** in  $\text{CDCl}_3$ .

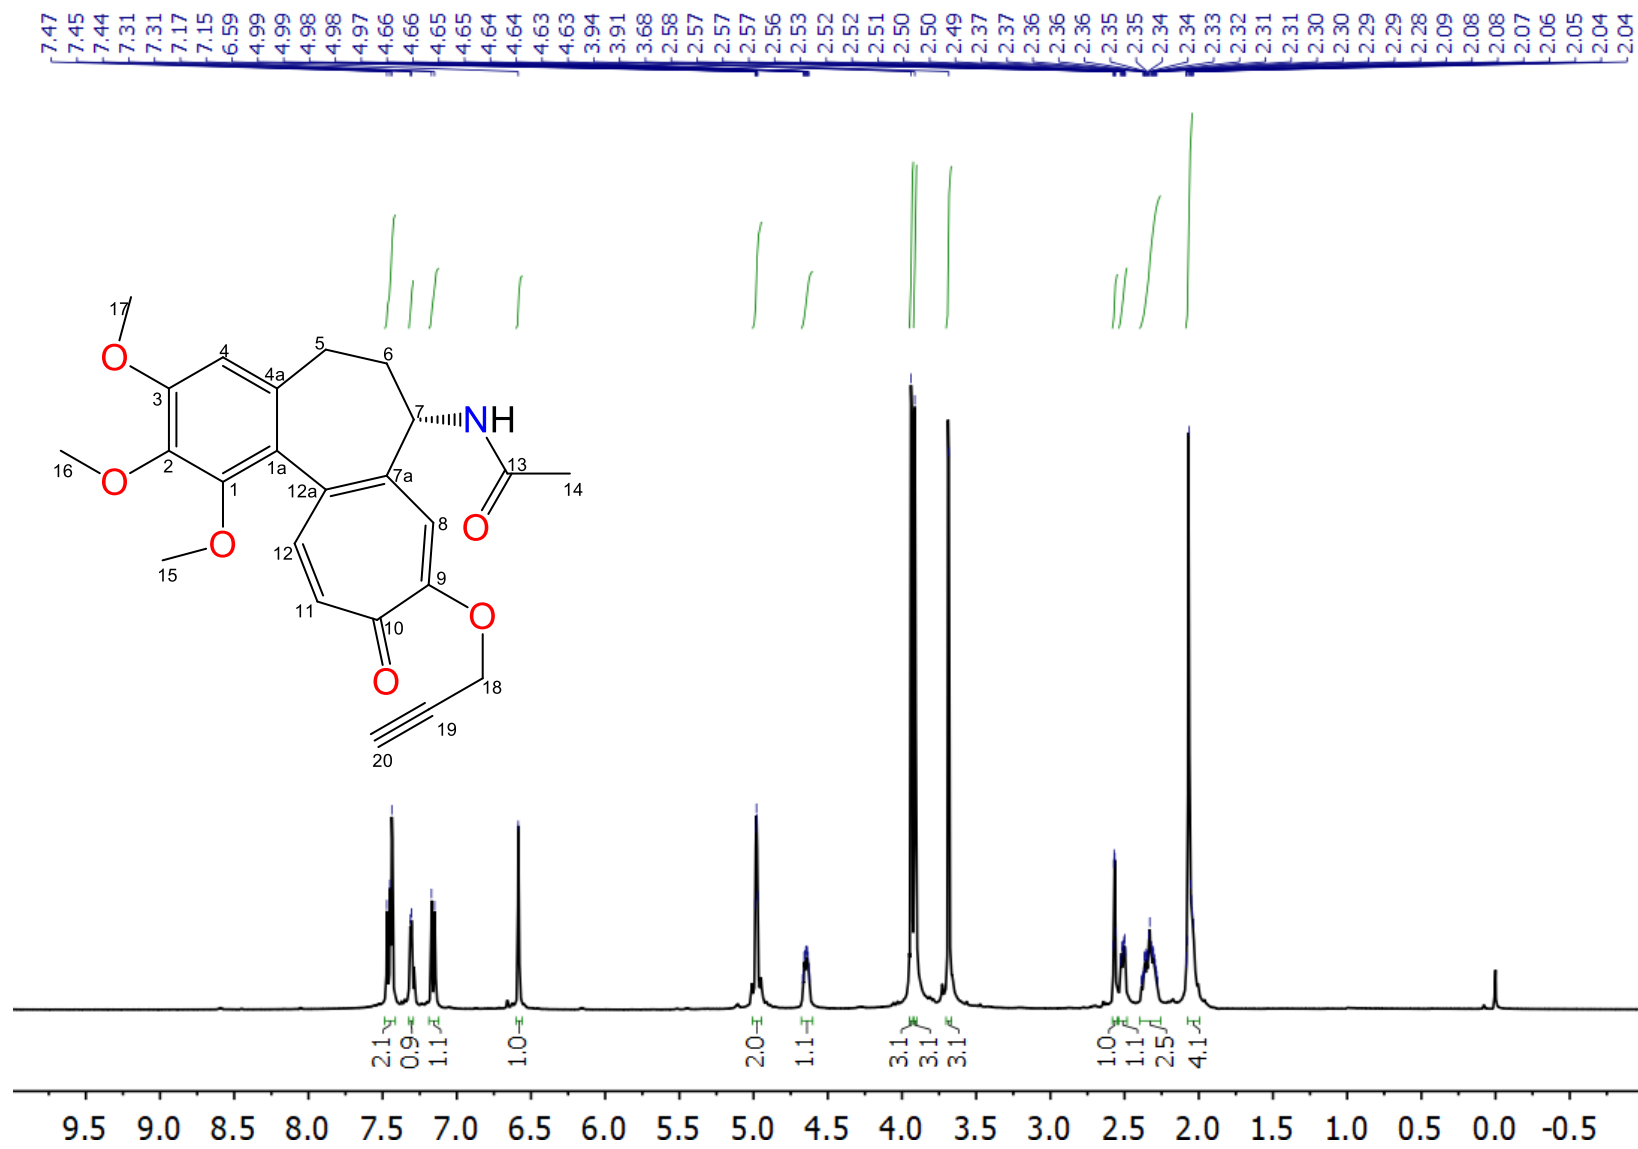

**Figure 60S.** <sup>1</sup>H NMR spectrum of compound **3f** in CDCl<sub>3</sub>.

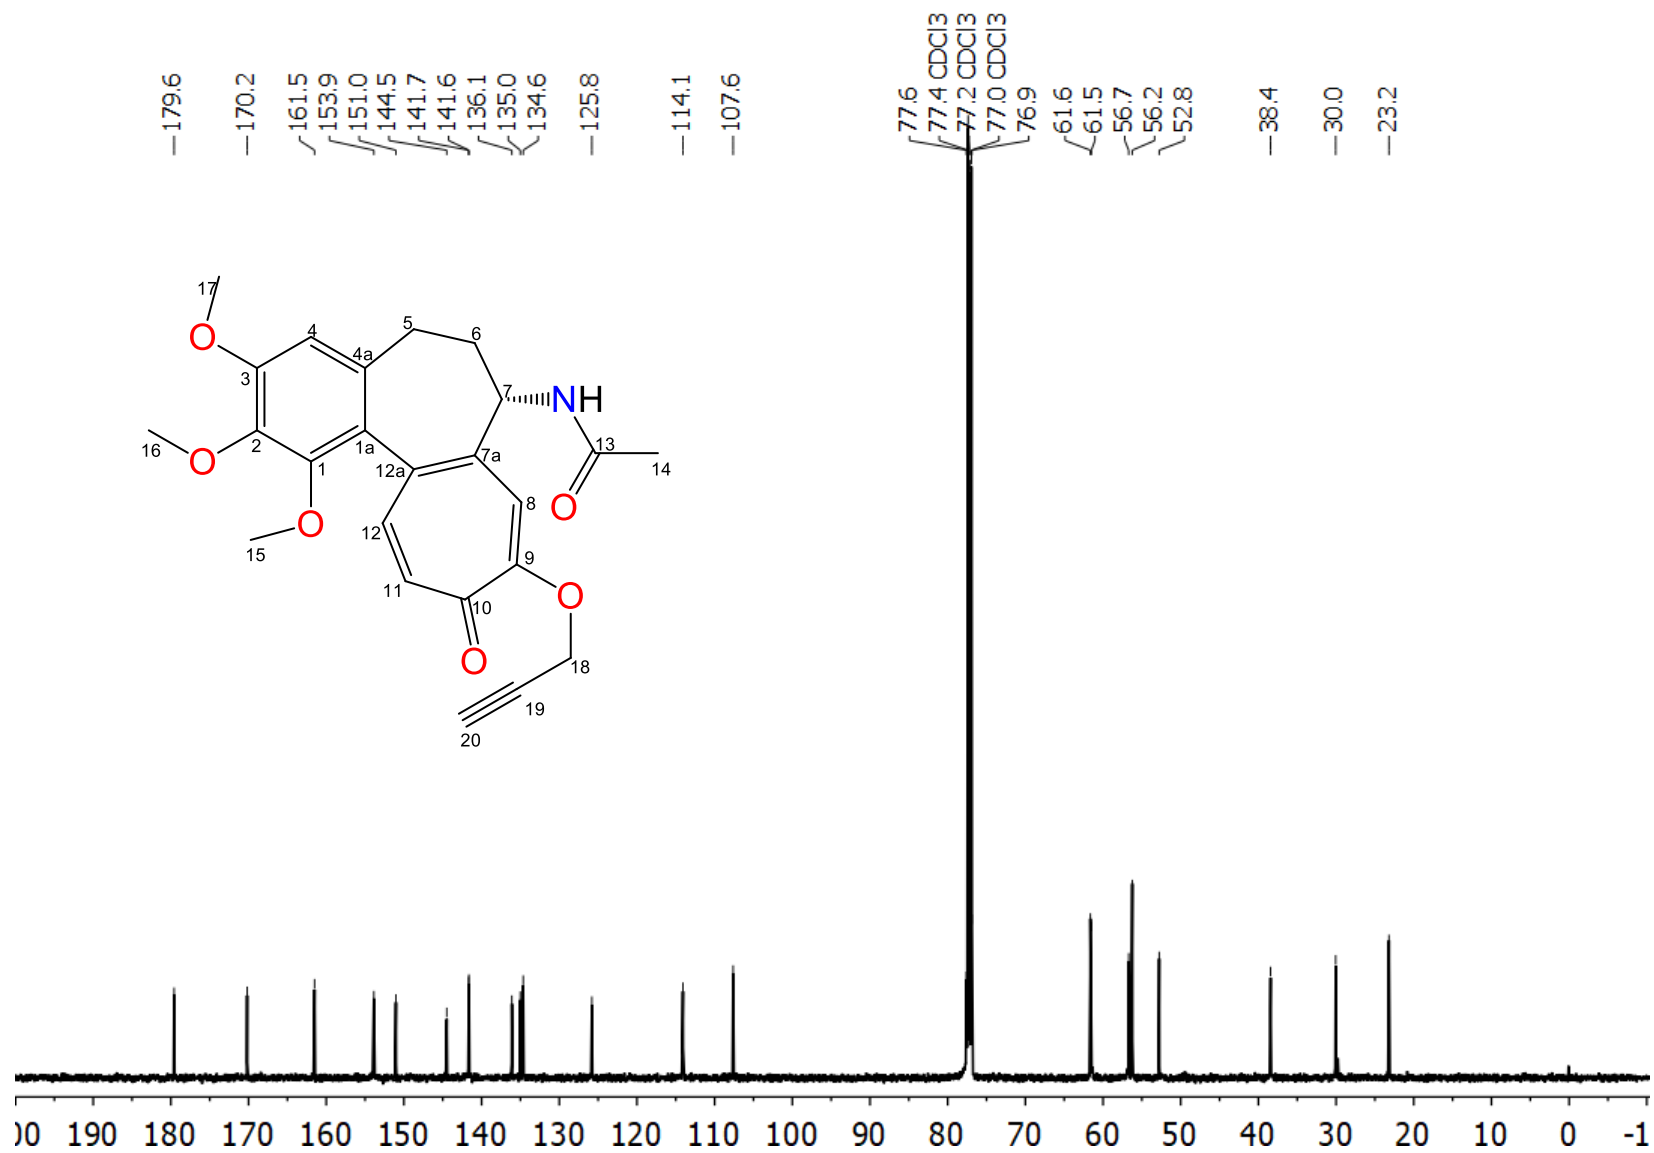

**Figure 61S.** <sup>13</sup>C NMR spectrum of compound **3f** in CDCl<sub>3</sub>.

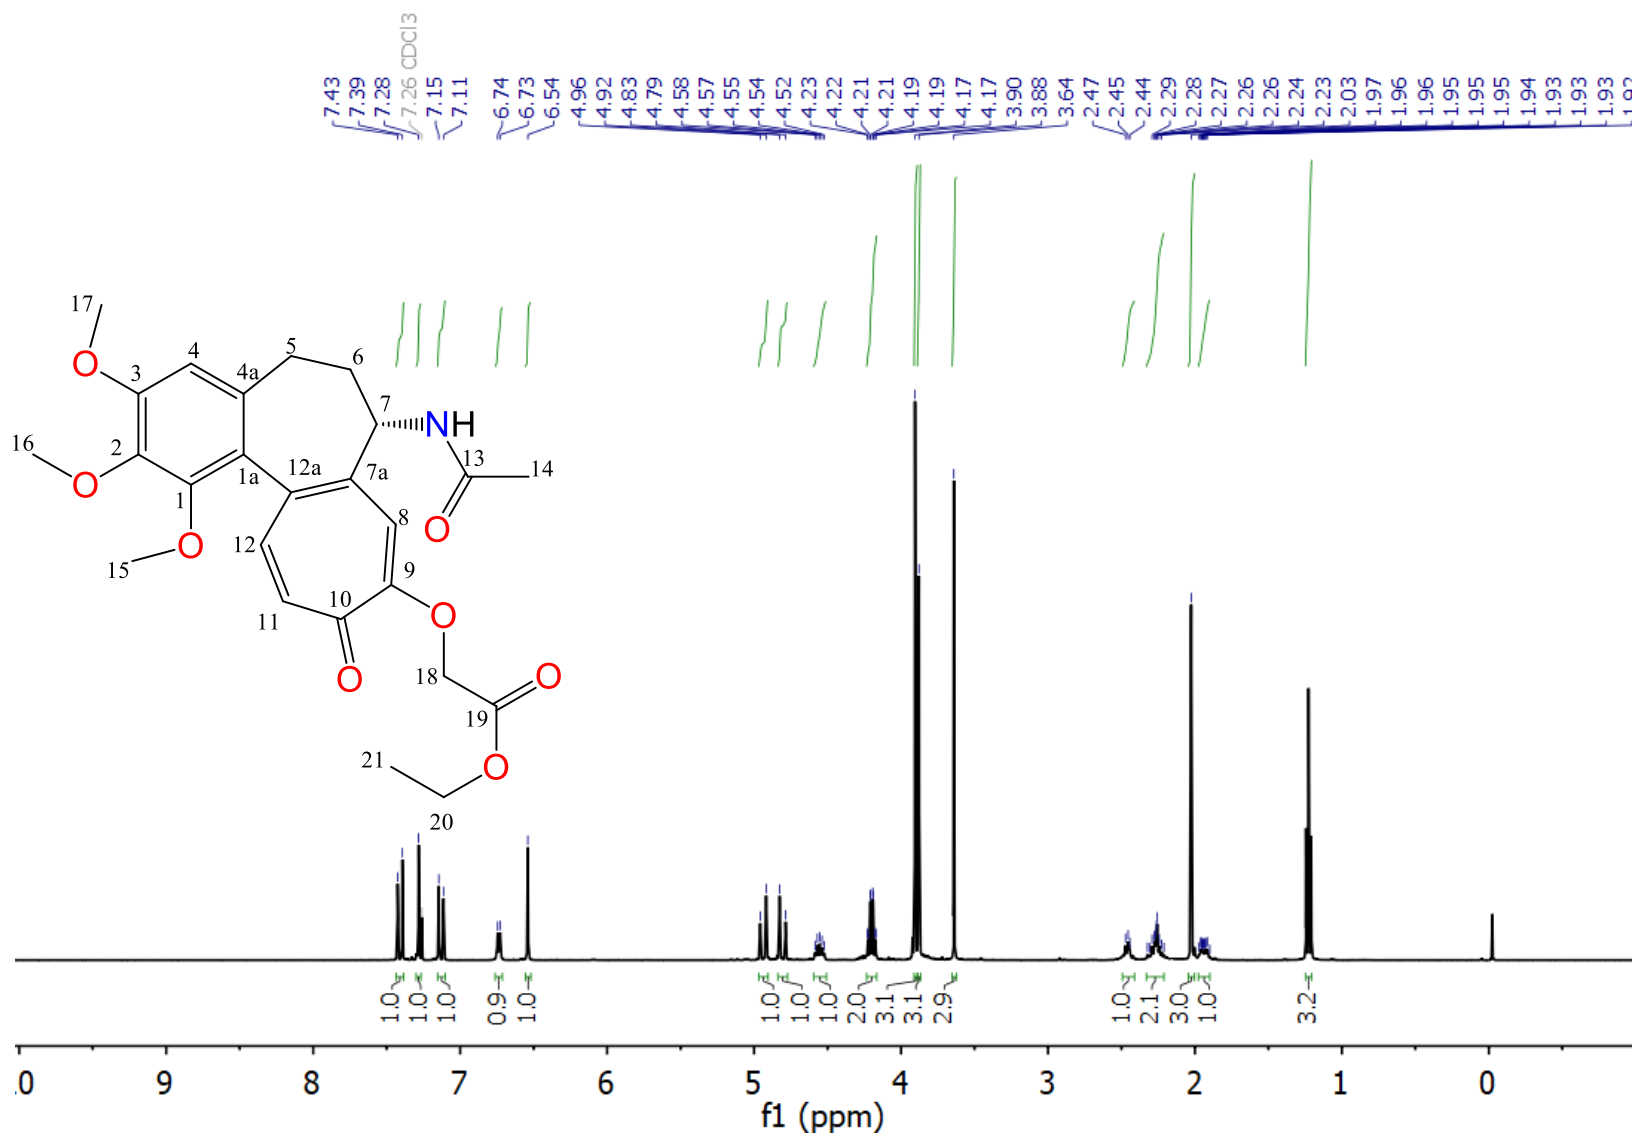

**Figure 62S.** <sup>1</sup>H NMR spectrum of compound **3g** in CDCl<sub>3</sub>.

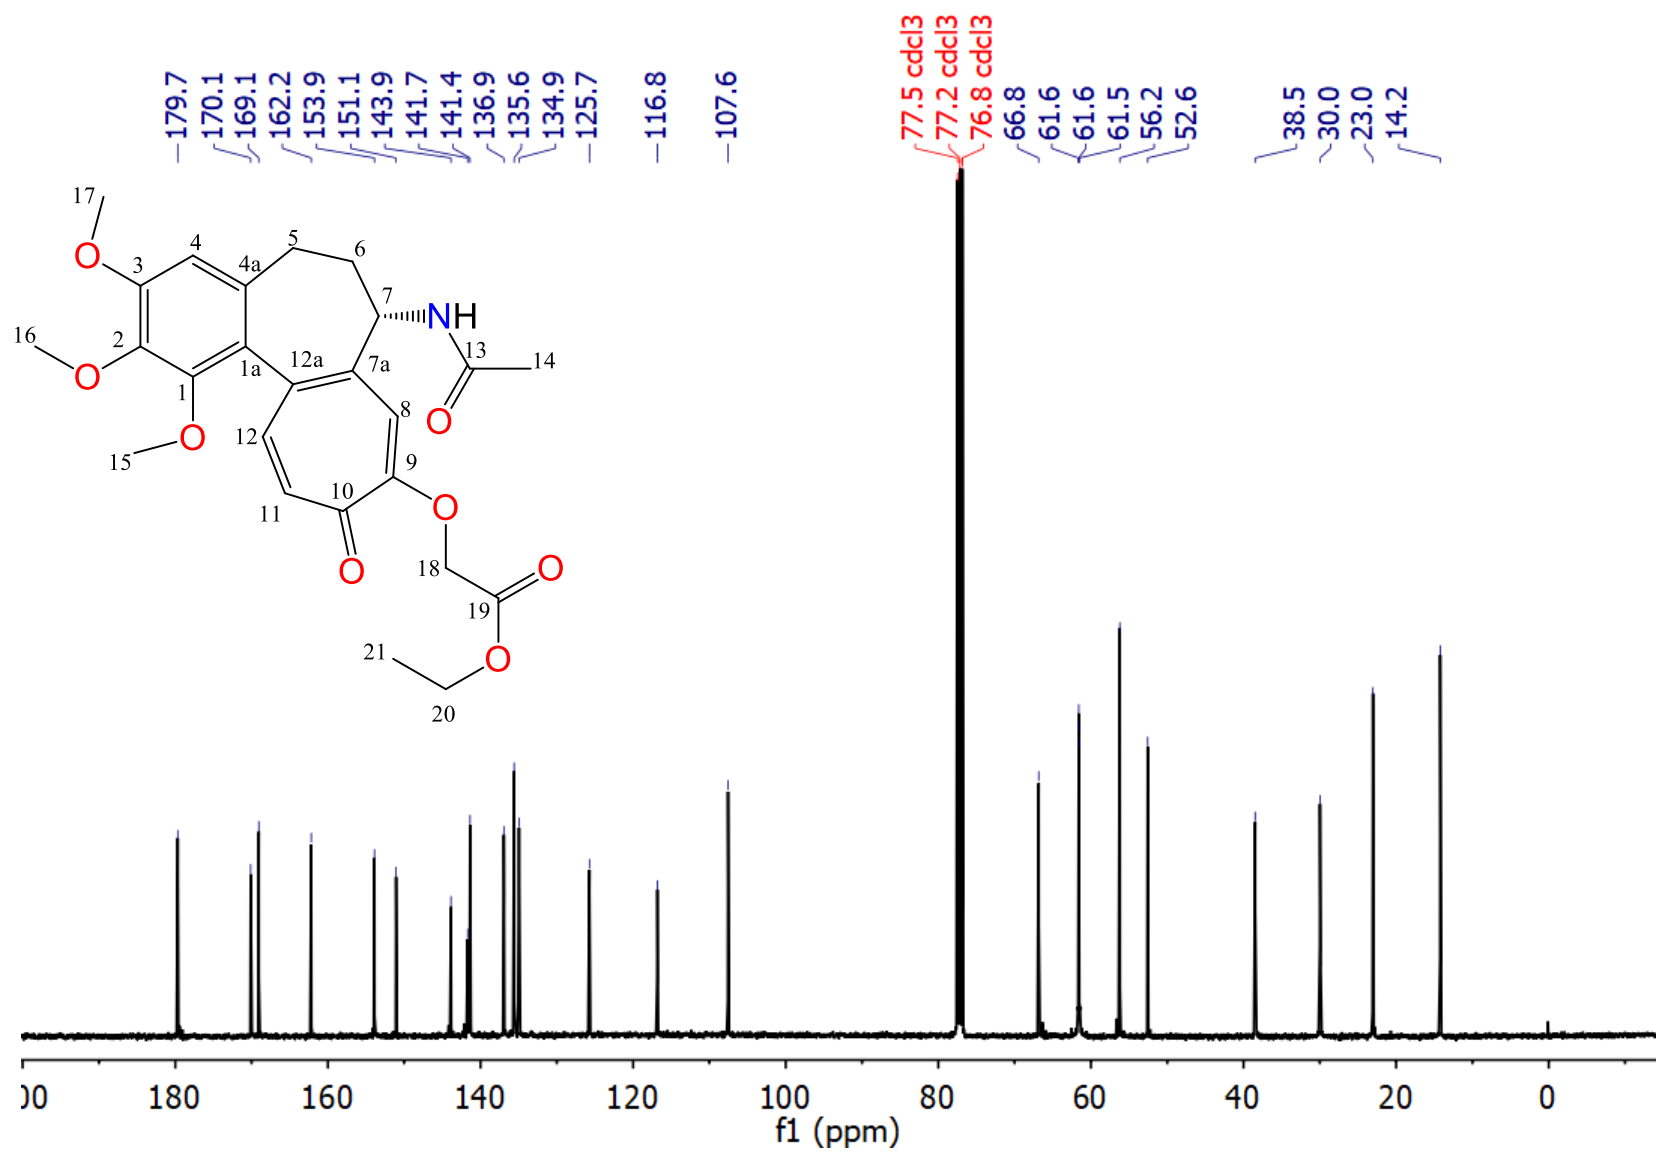

**Figure 63S.**  $^{13}\text{C}$  NMR spectrum of compound **3g** in  $\text{CDCl}_3$ .

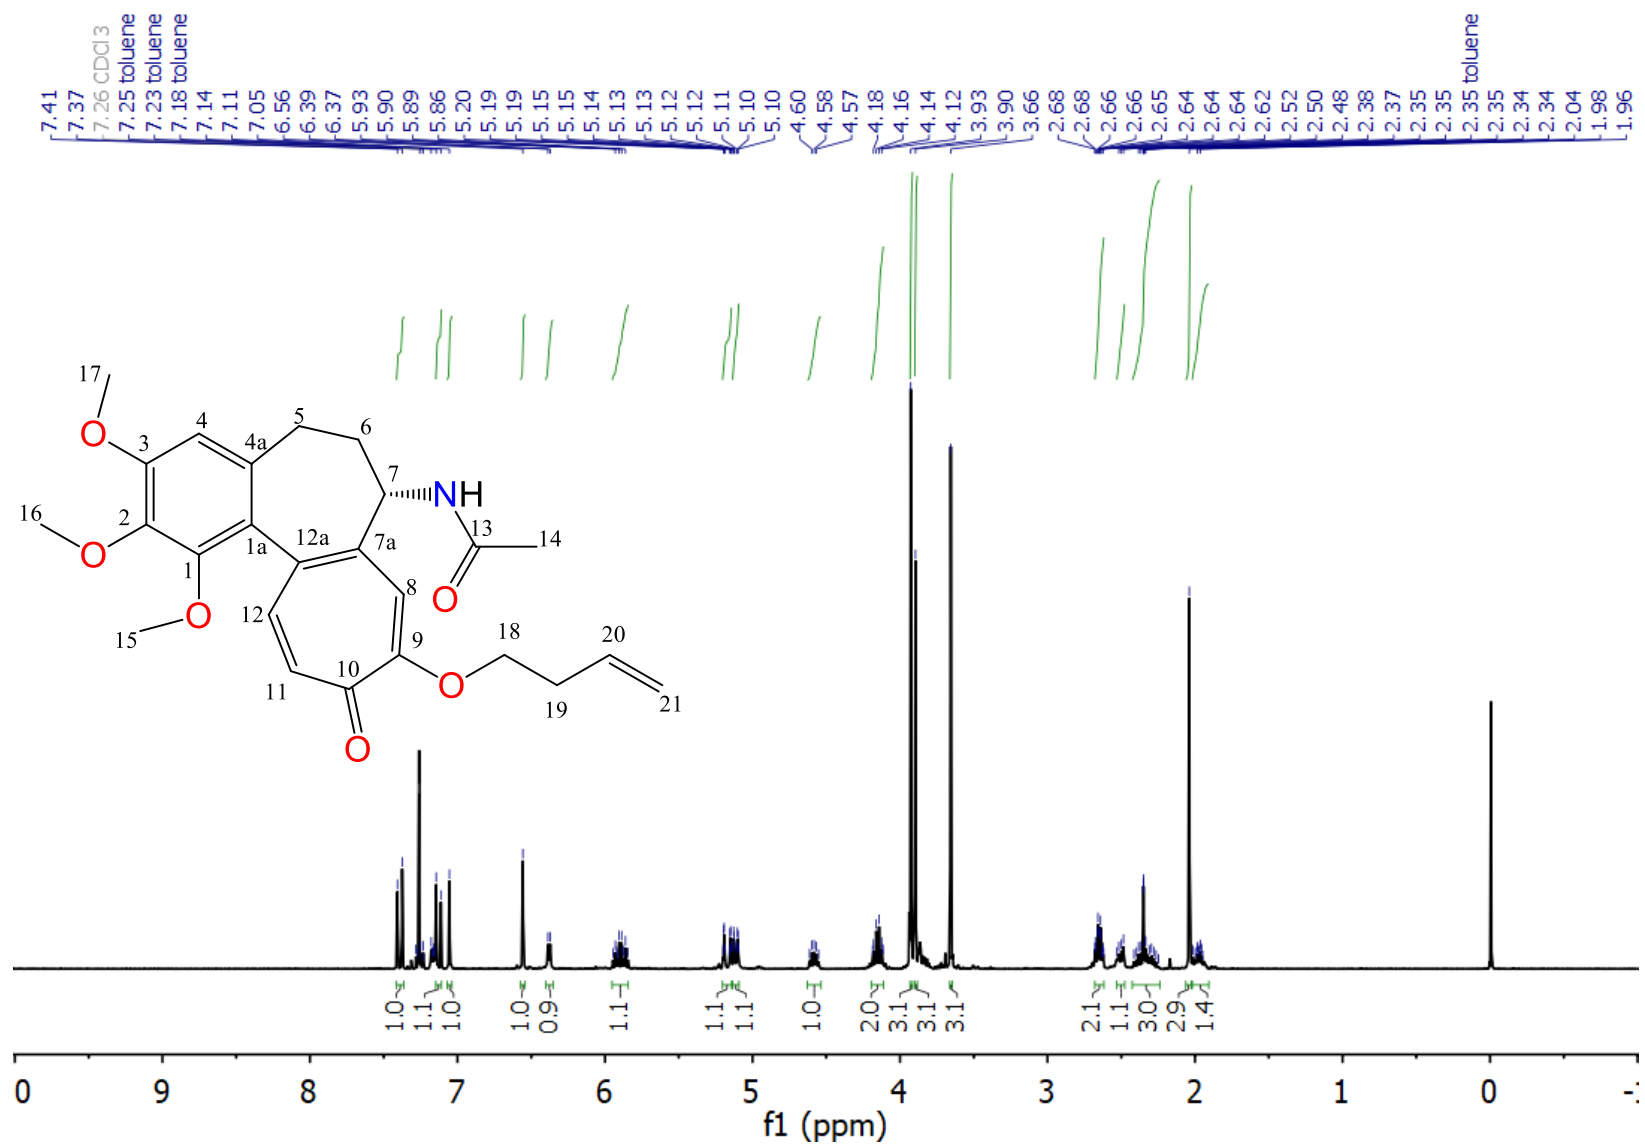

**Figure 64S.** <sup>1</sup>H NMR spectrum of compound **3h** in CDCl<sub>3</sub>.

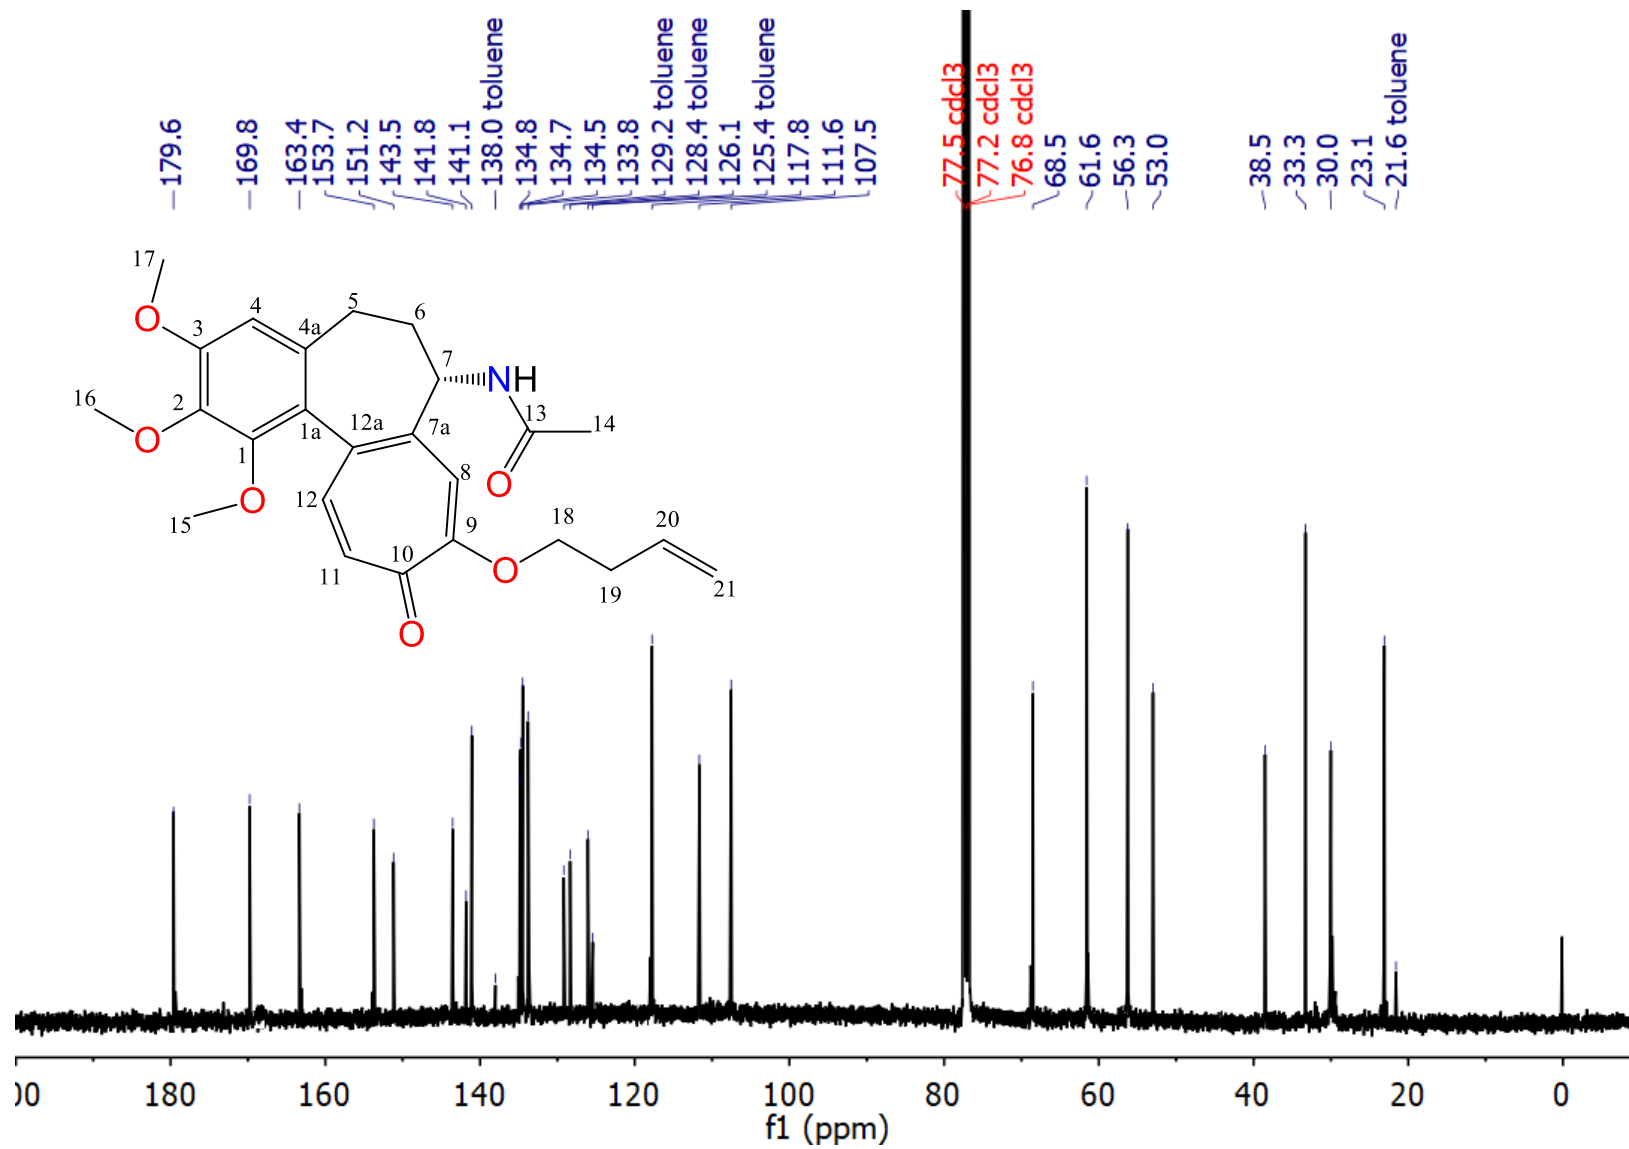

**Figure 65S.**  $^{13}\text{C}$  NMR spectrum of compound **3h** in  $\text{CDCl}_3$ .



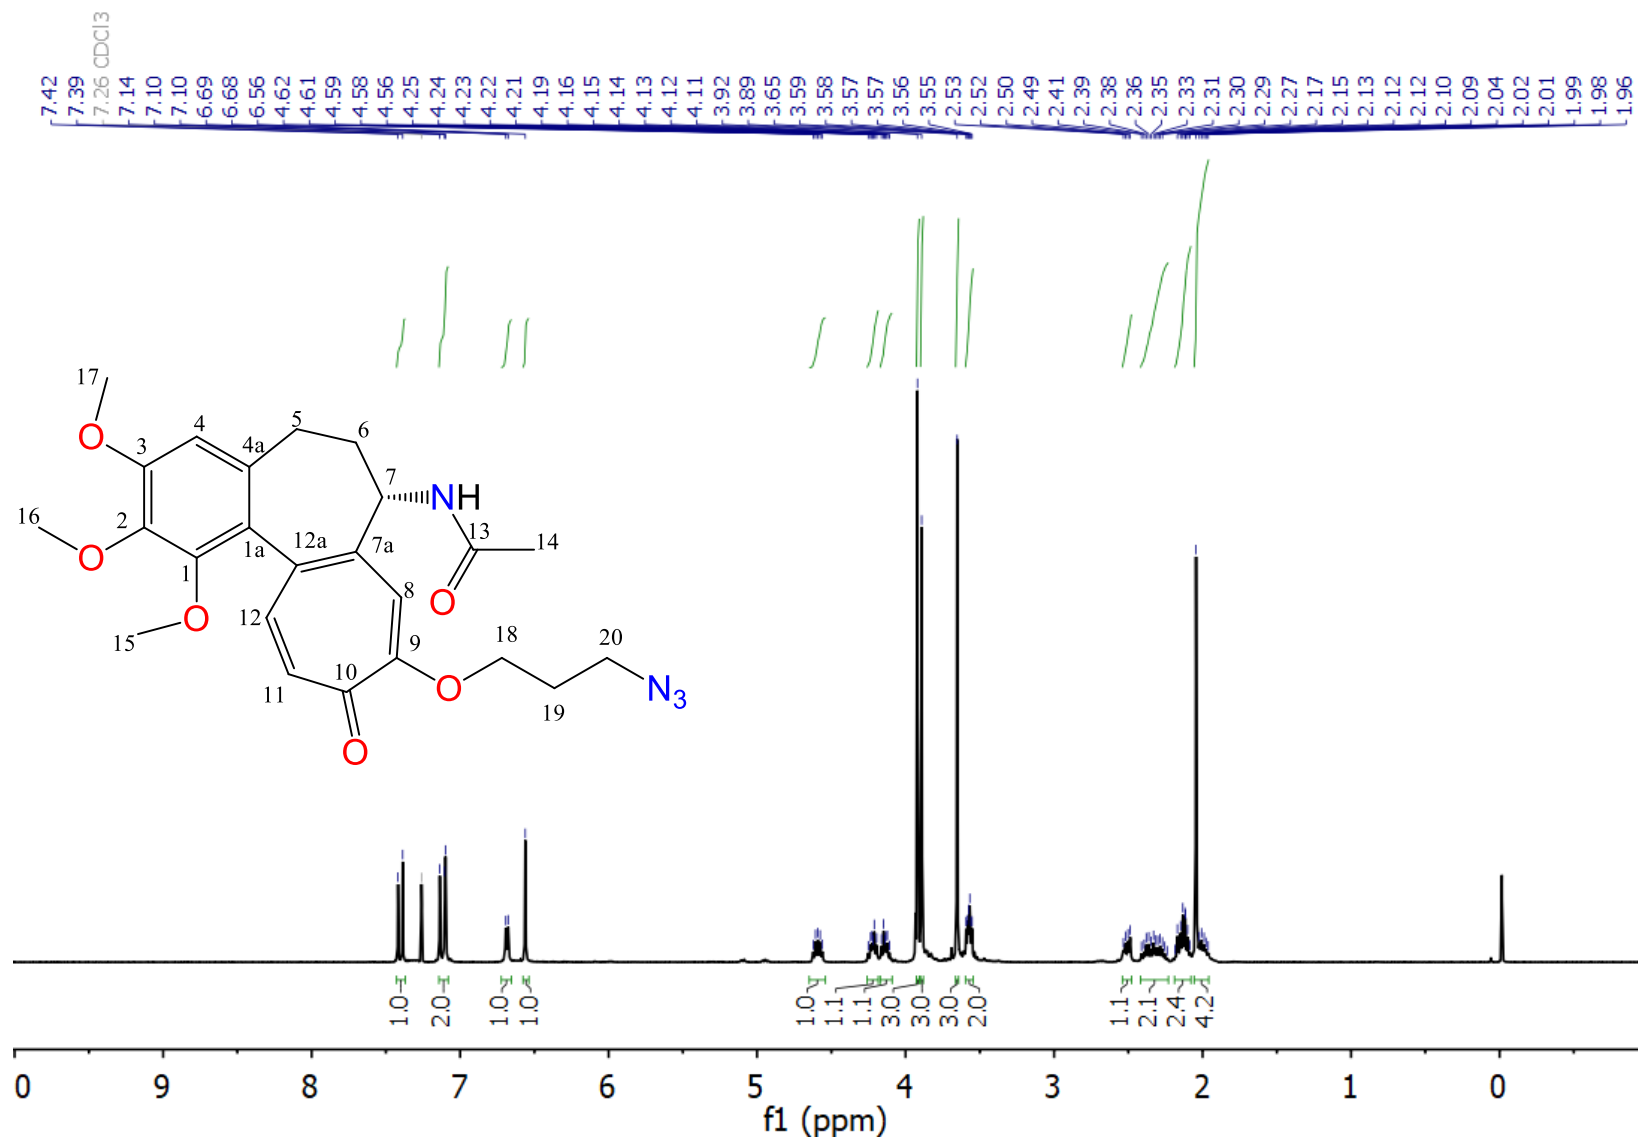

**Figure 66S.** <sup>1</sup>H NMR spectrum of compound **3i** in CDCl<sub>3</sub>.

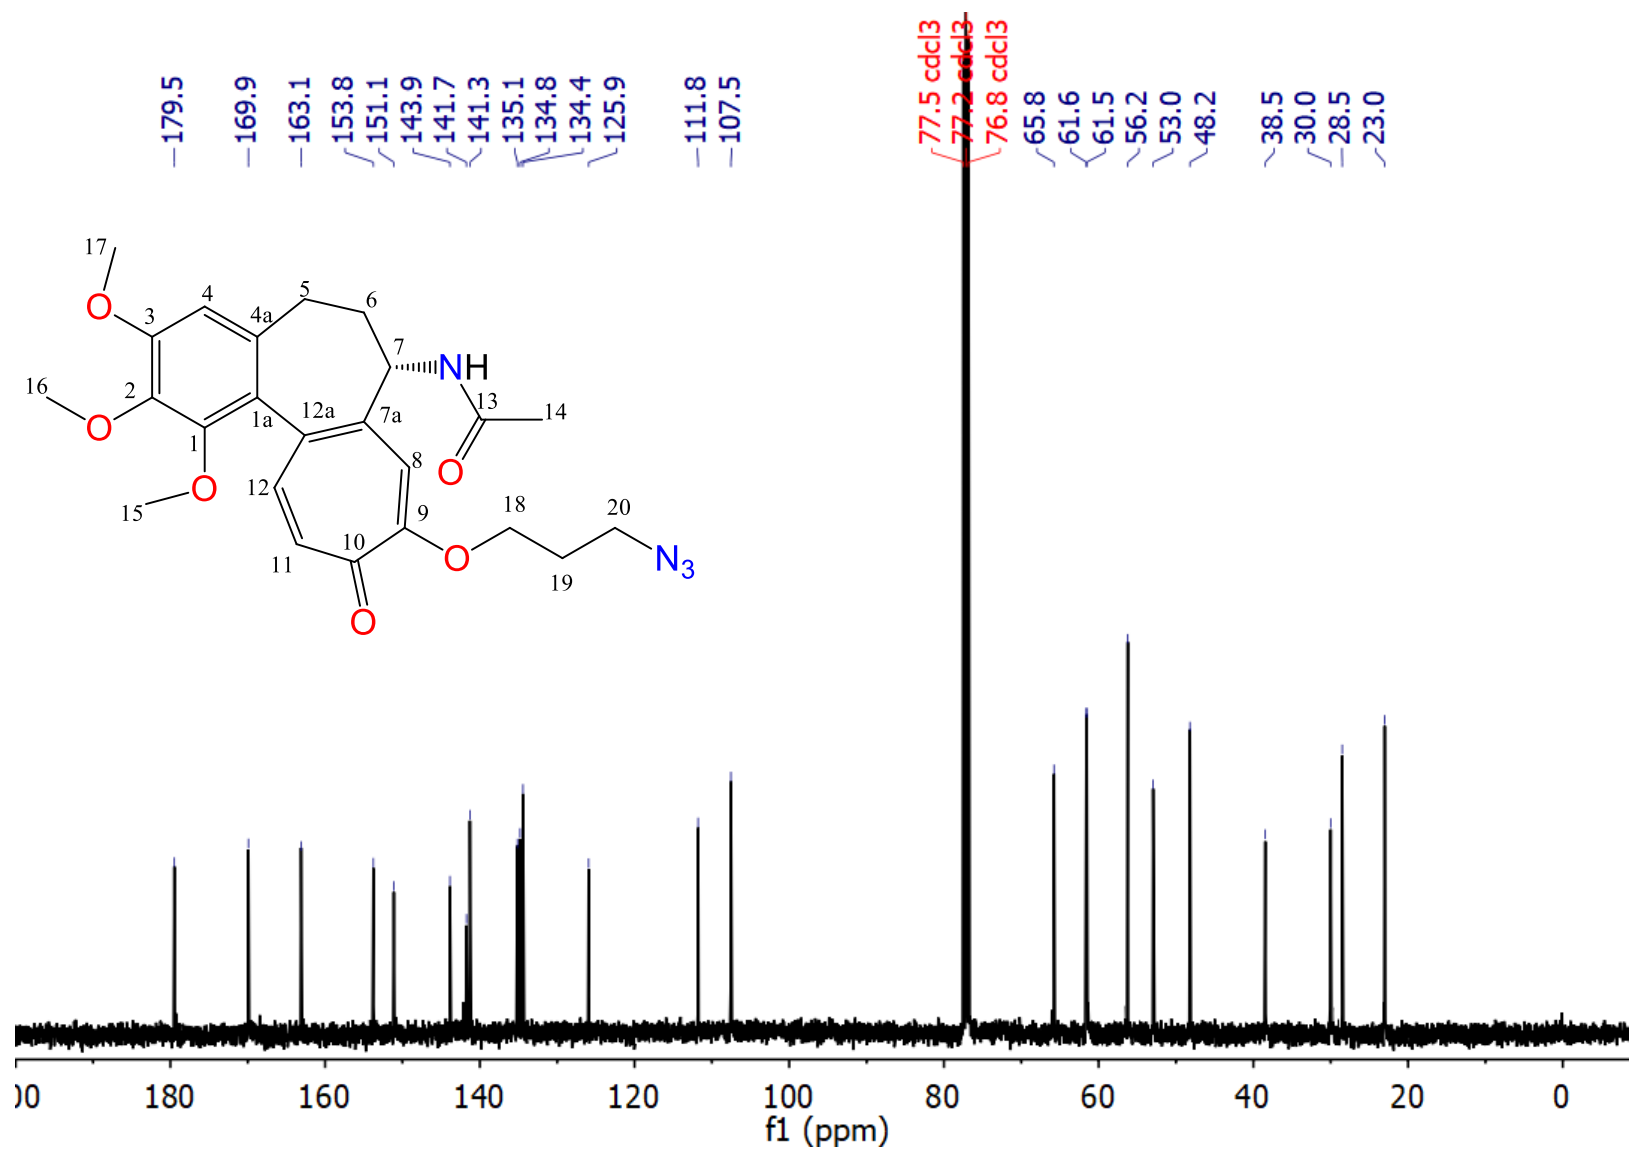

**Figure 67S.**  $^{13}\text{C}$  NMR spectrum of compound **3i** in  $\text{CDCl}_3$ .

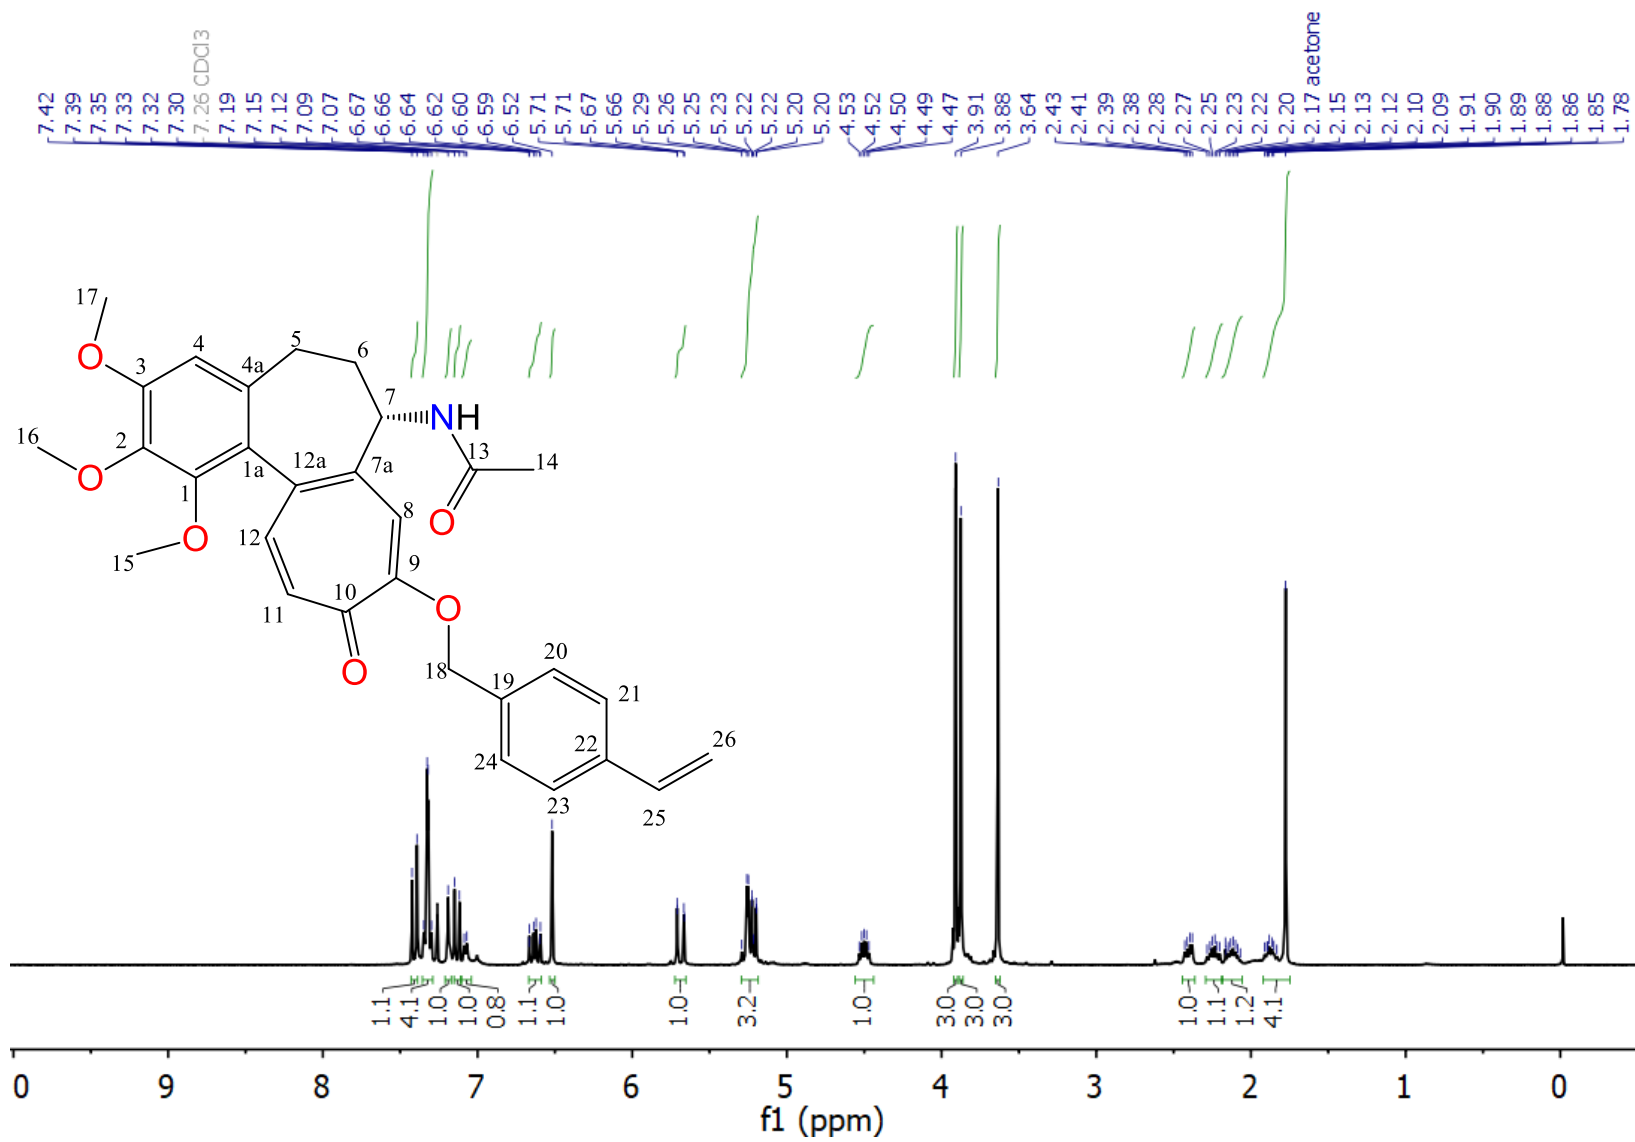

**Figure 68S.** <sup>1</sup>H NMR spectrum of compound **3j** in CDCl<sub>3</sub>.

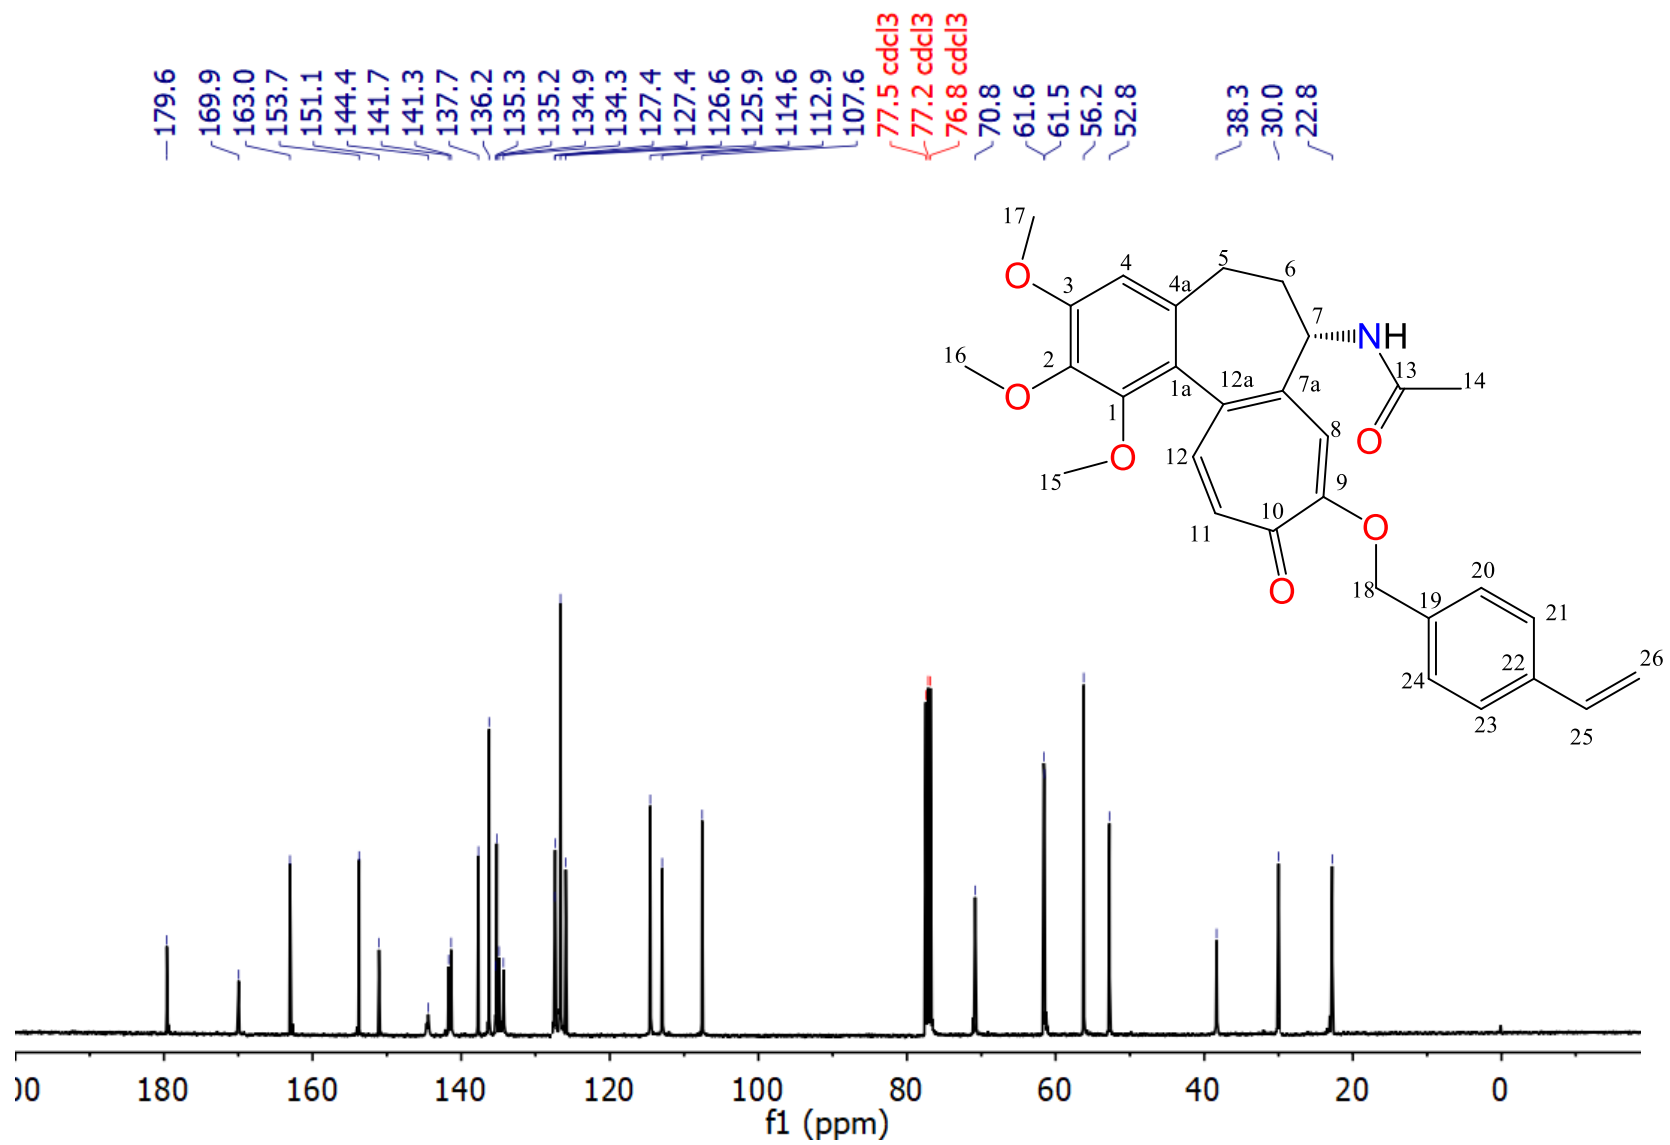

**Figure 69S.**  $^{13}\text{C}$  NMR spectrum of compound **3j** in  $\text{CDCl}_3$ .

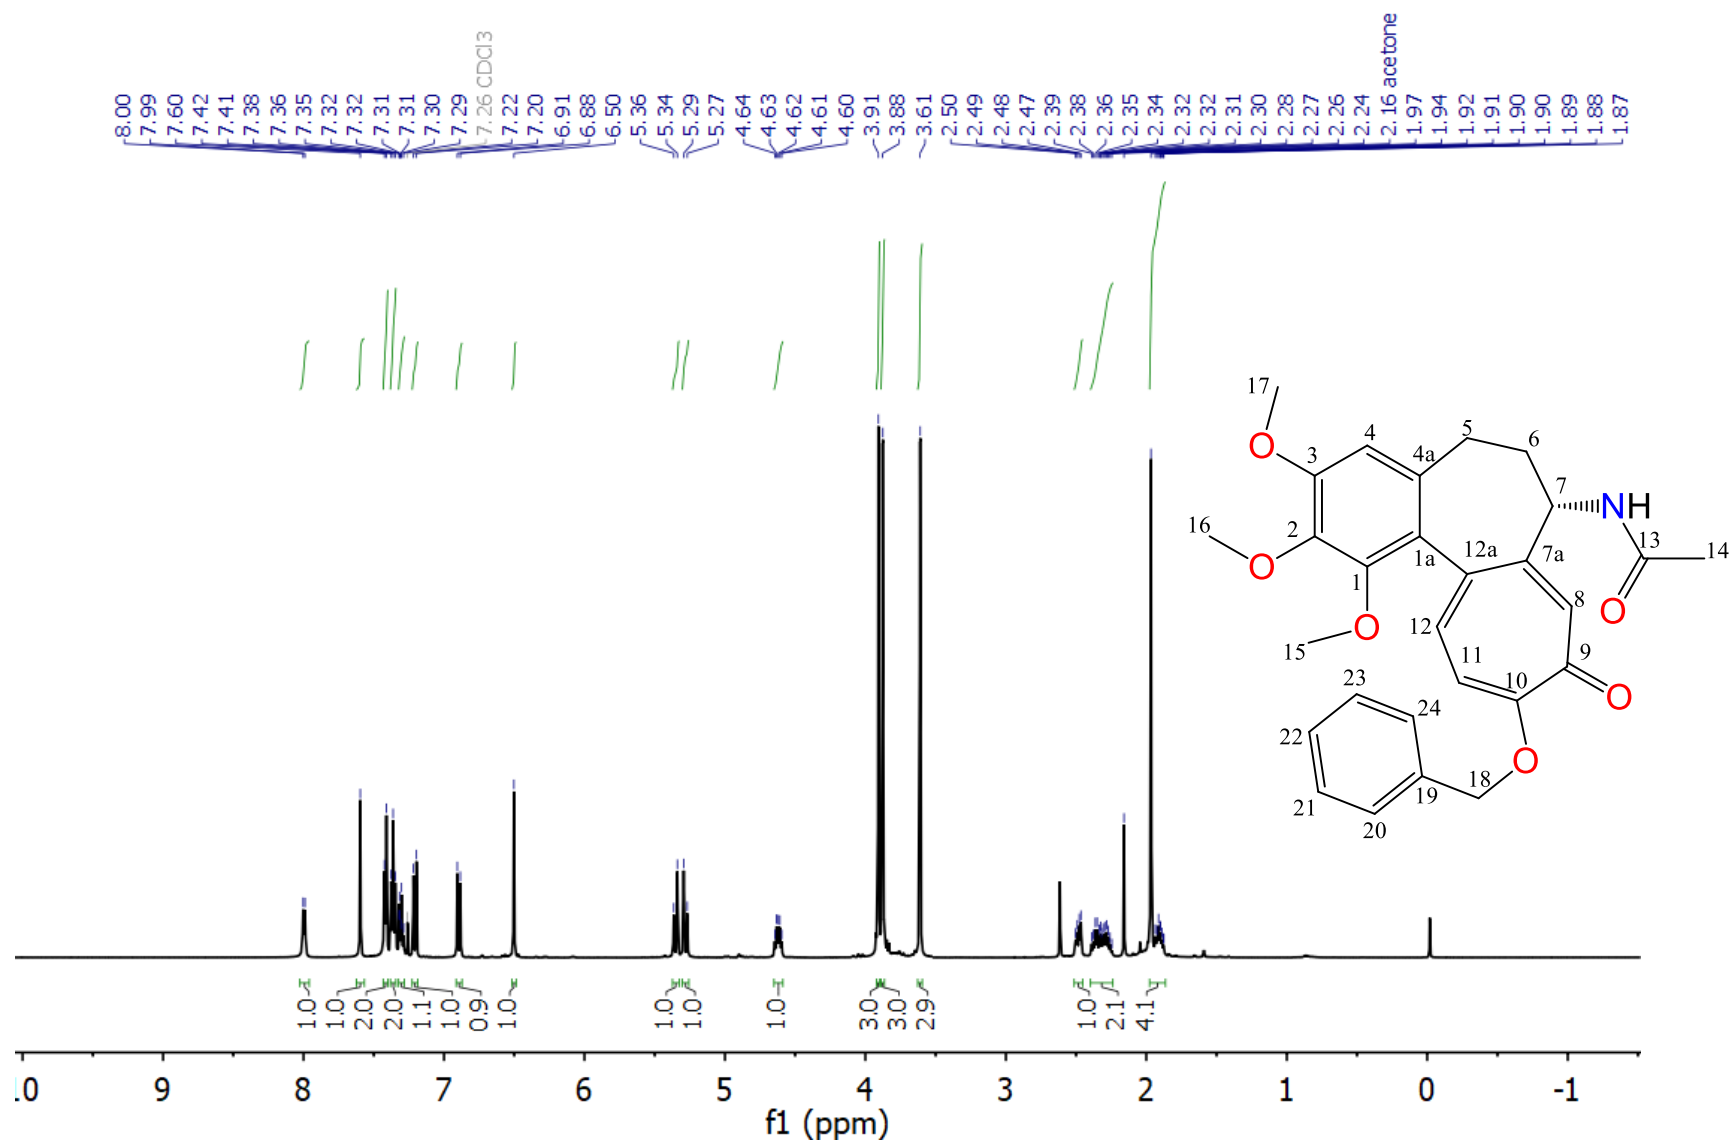

**Figure 70S.**  $^1\text{H}$  NMR spectrum of compound **4a** in CDCl<sub>3</sub>.

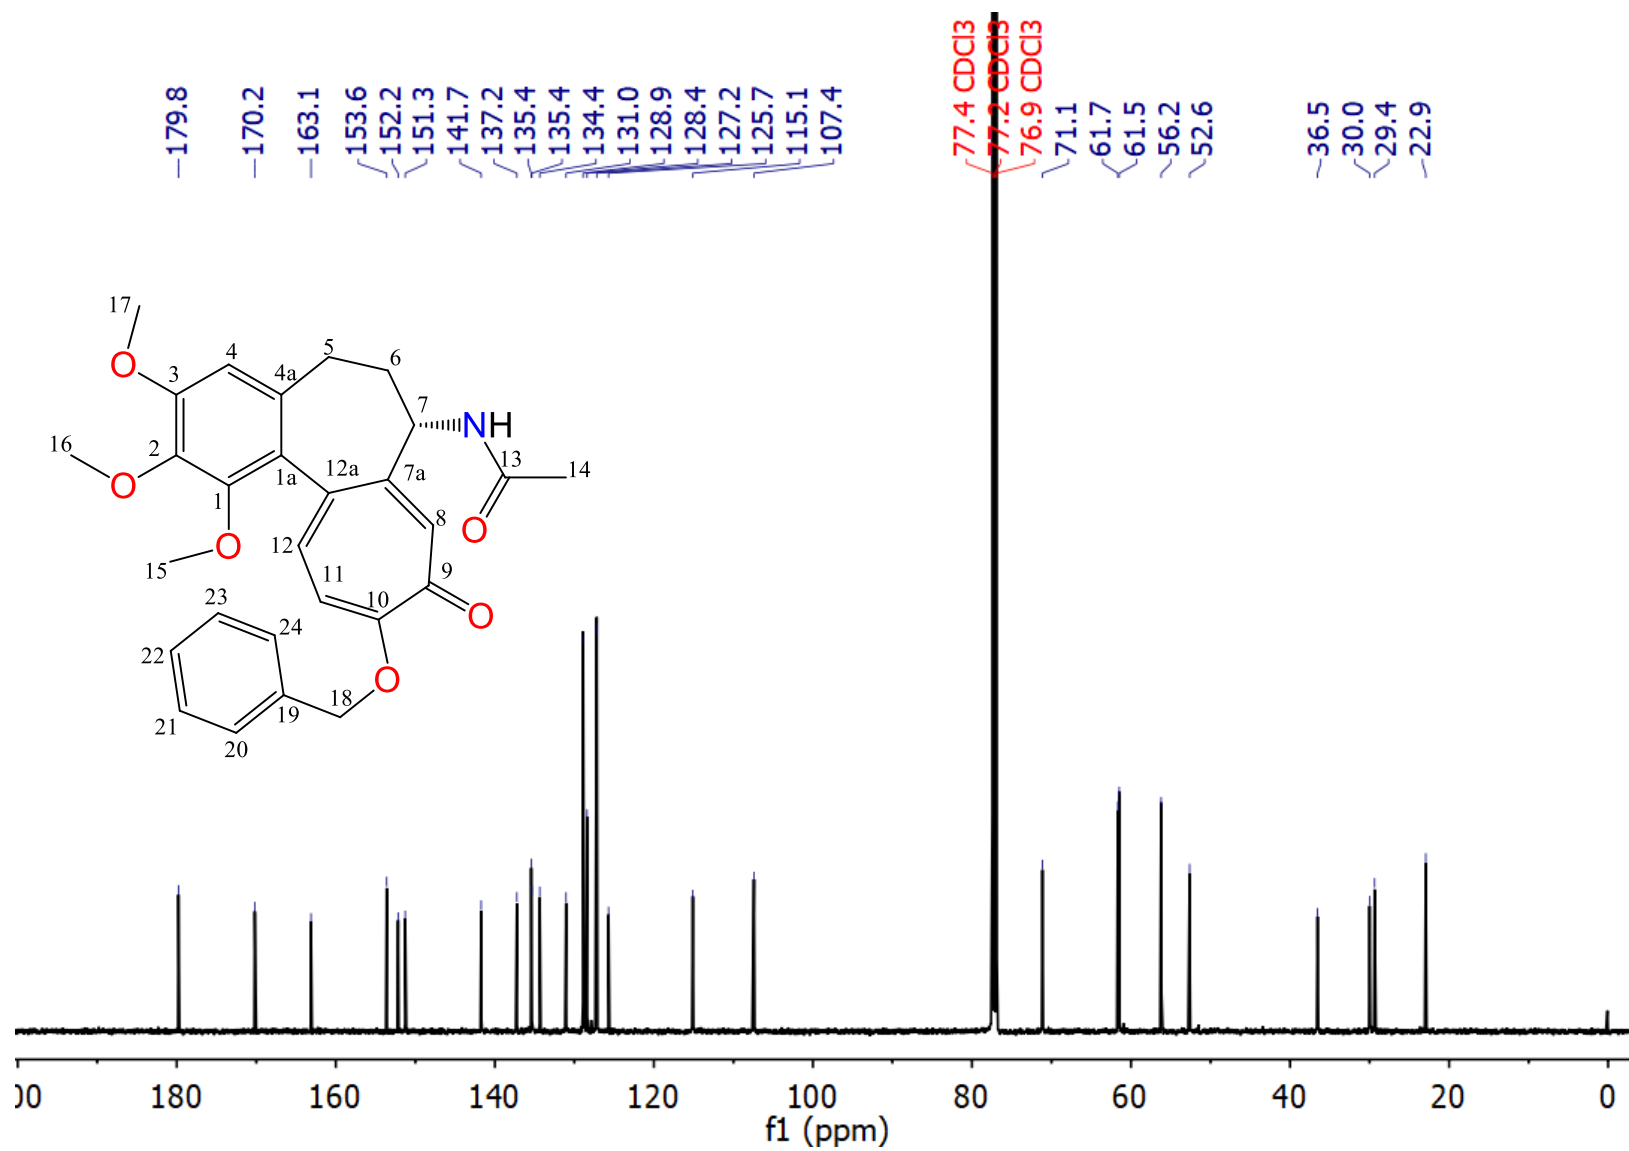

**Figure 71S.** <sup>13</sup>C NMR spectrum of compound **4a** in CDCl<sub>3</sub>.

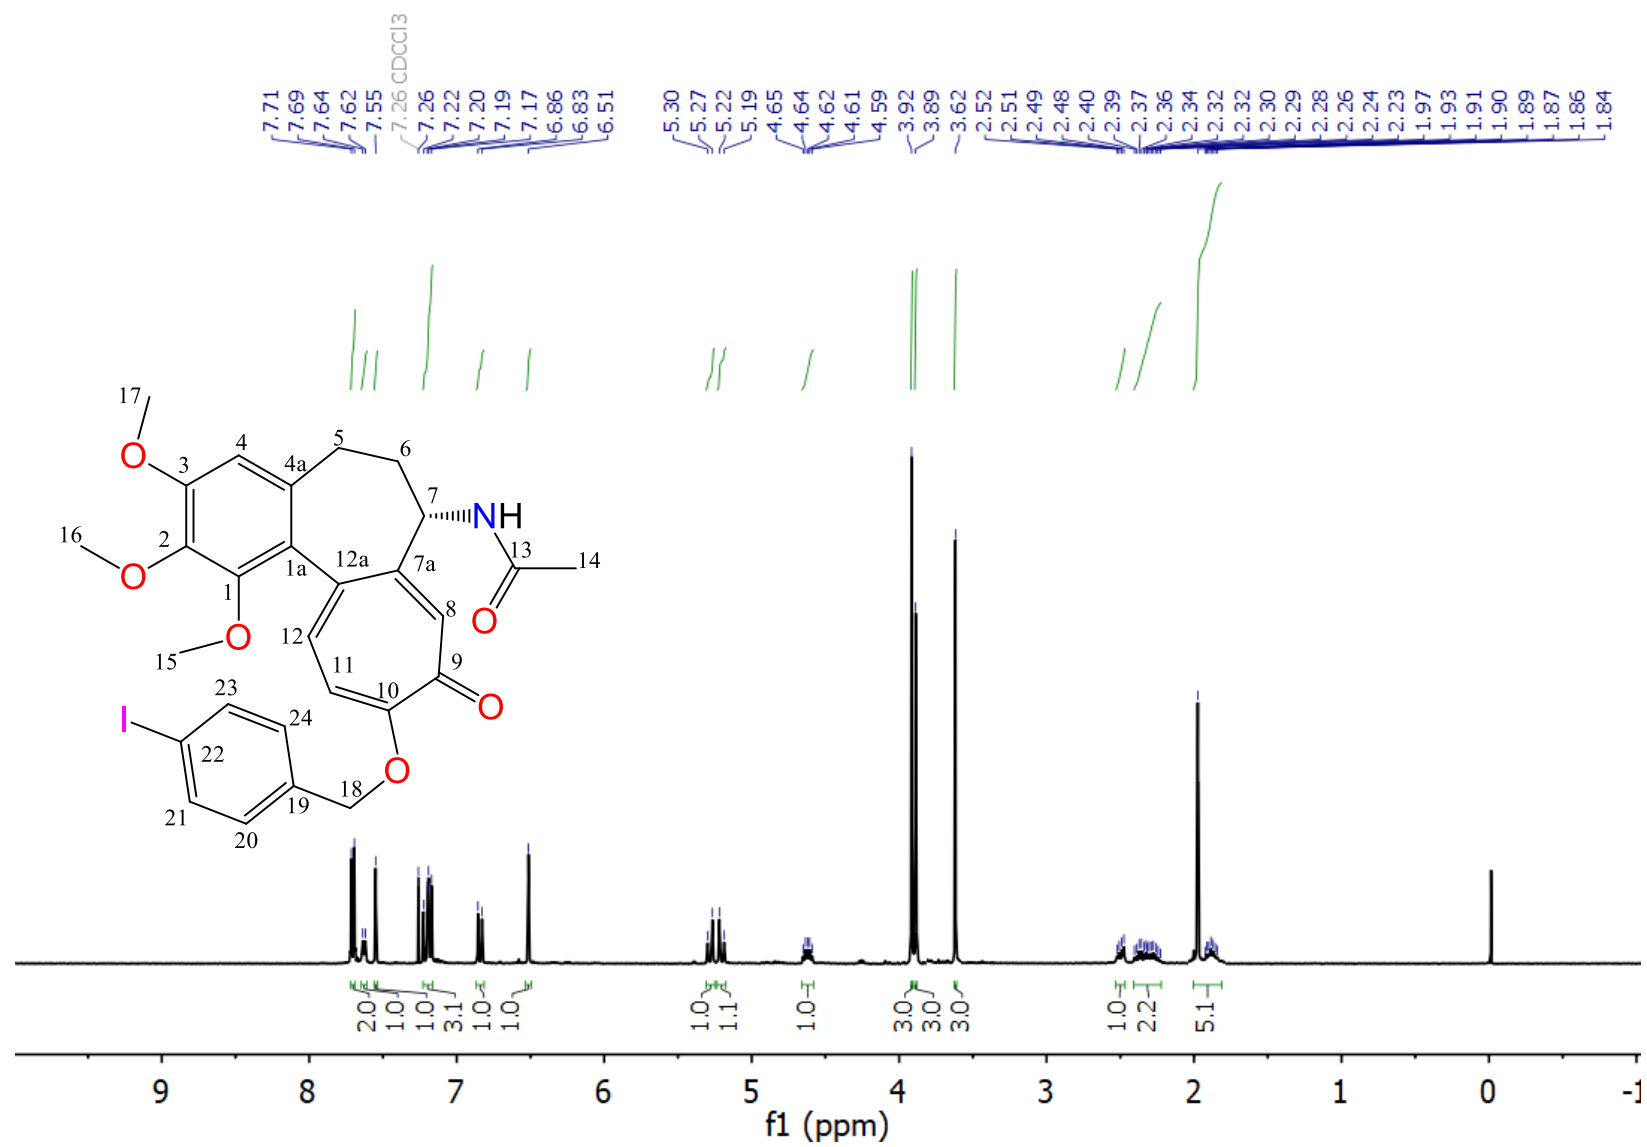

**Figure 72S.**  $^1\text{H}$  NMR spectrum of compound **4b** in  $\text{CDCl}_3$ .

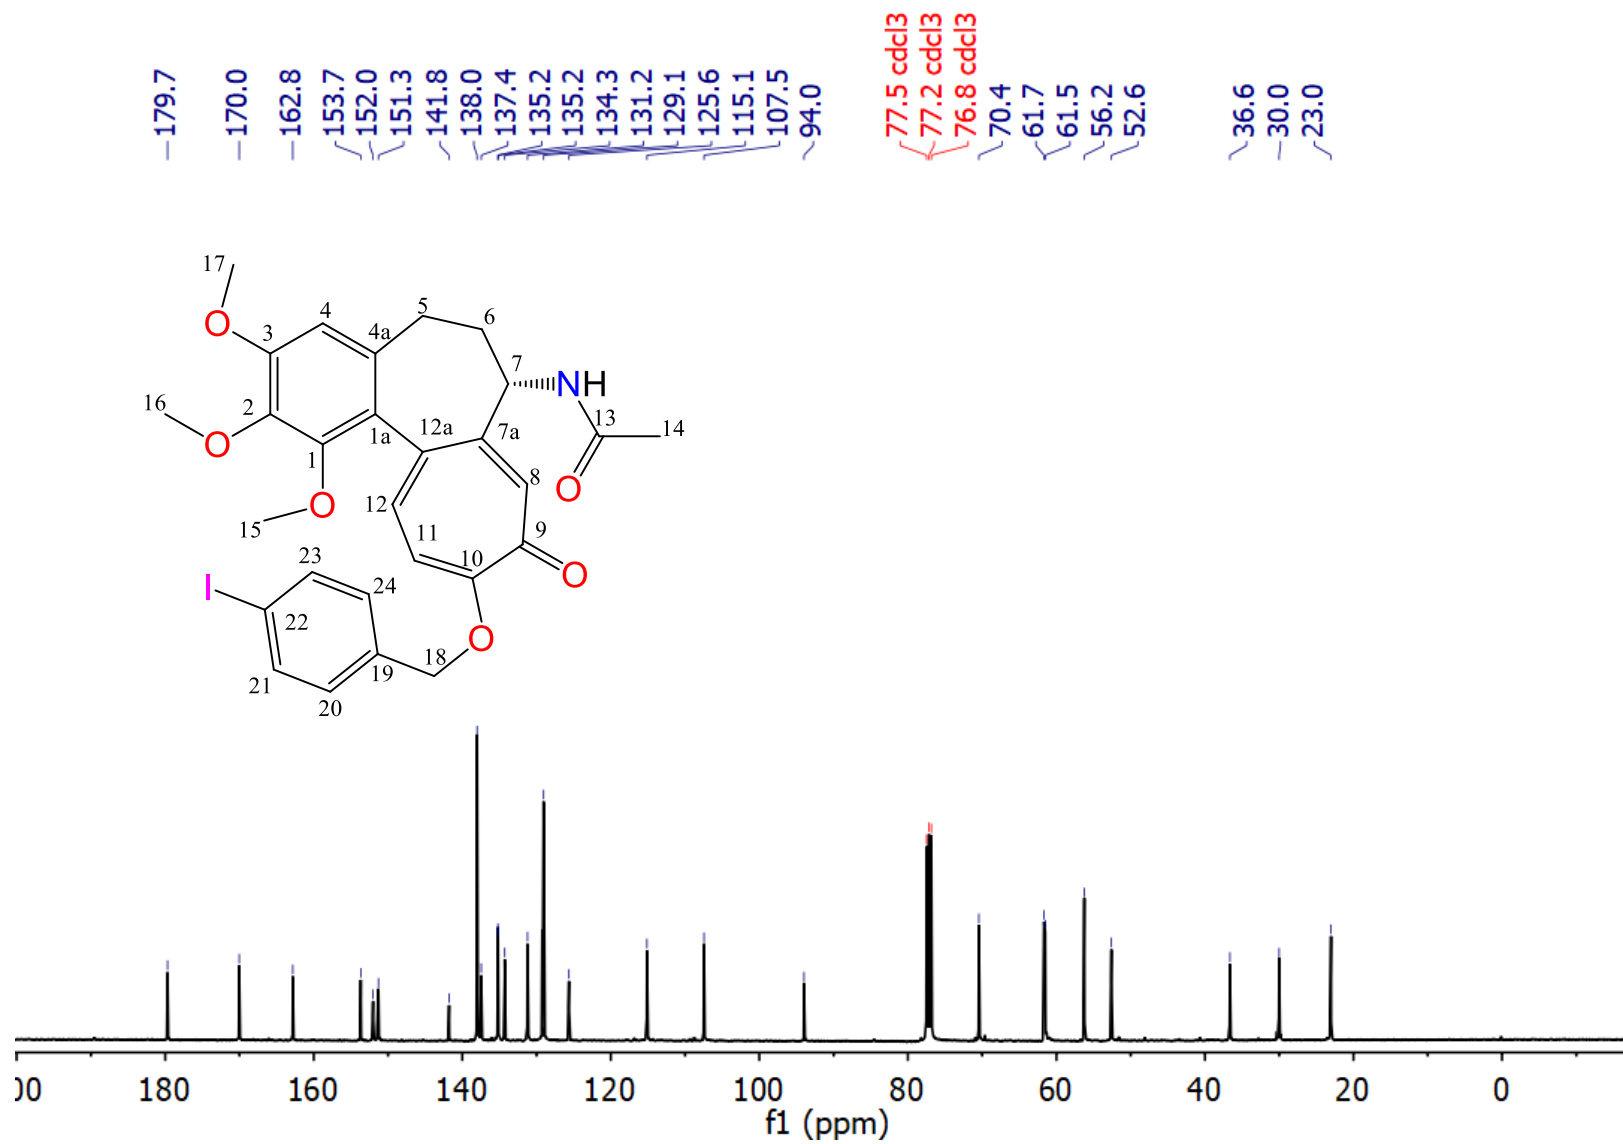

**Figure 73S.**  $^{13}\text{C}$  NMR spectrum of compound **4b** in  $\text{CDCl}_3$ .



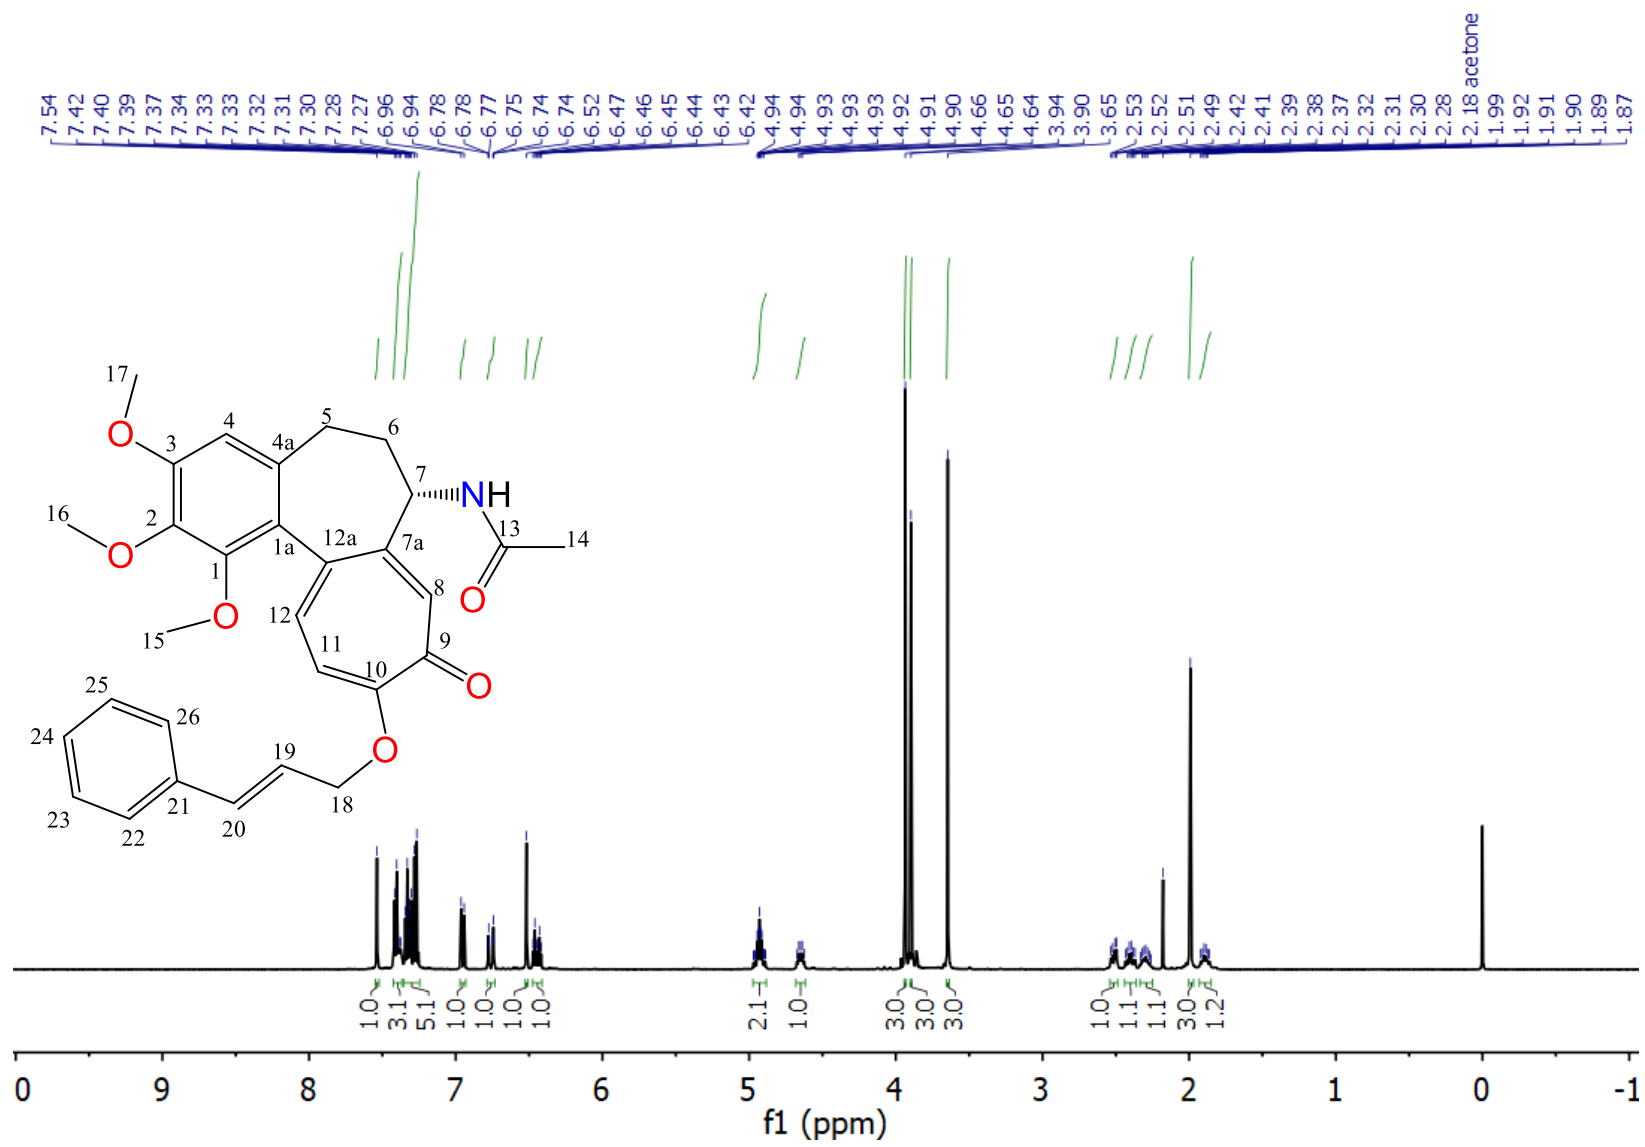

**Figure 74S.**  $^1\text{H}$  NMR spectrum of compound **4c** in  $\text{CDCl}_3$ .

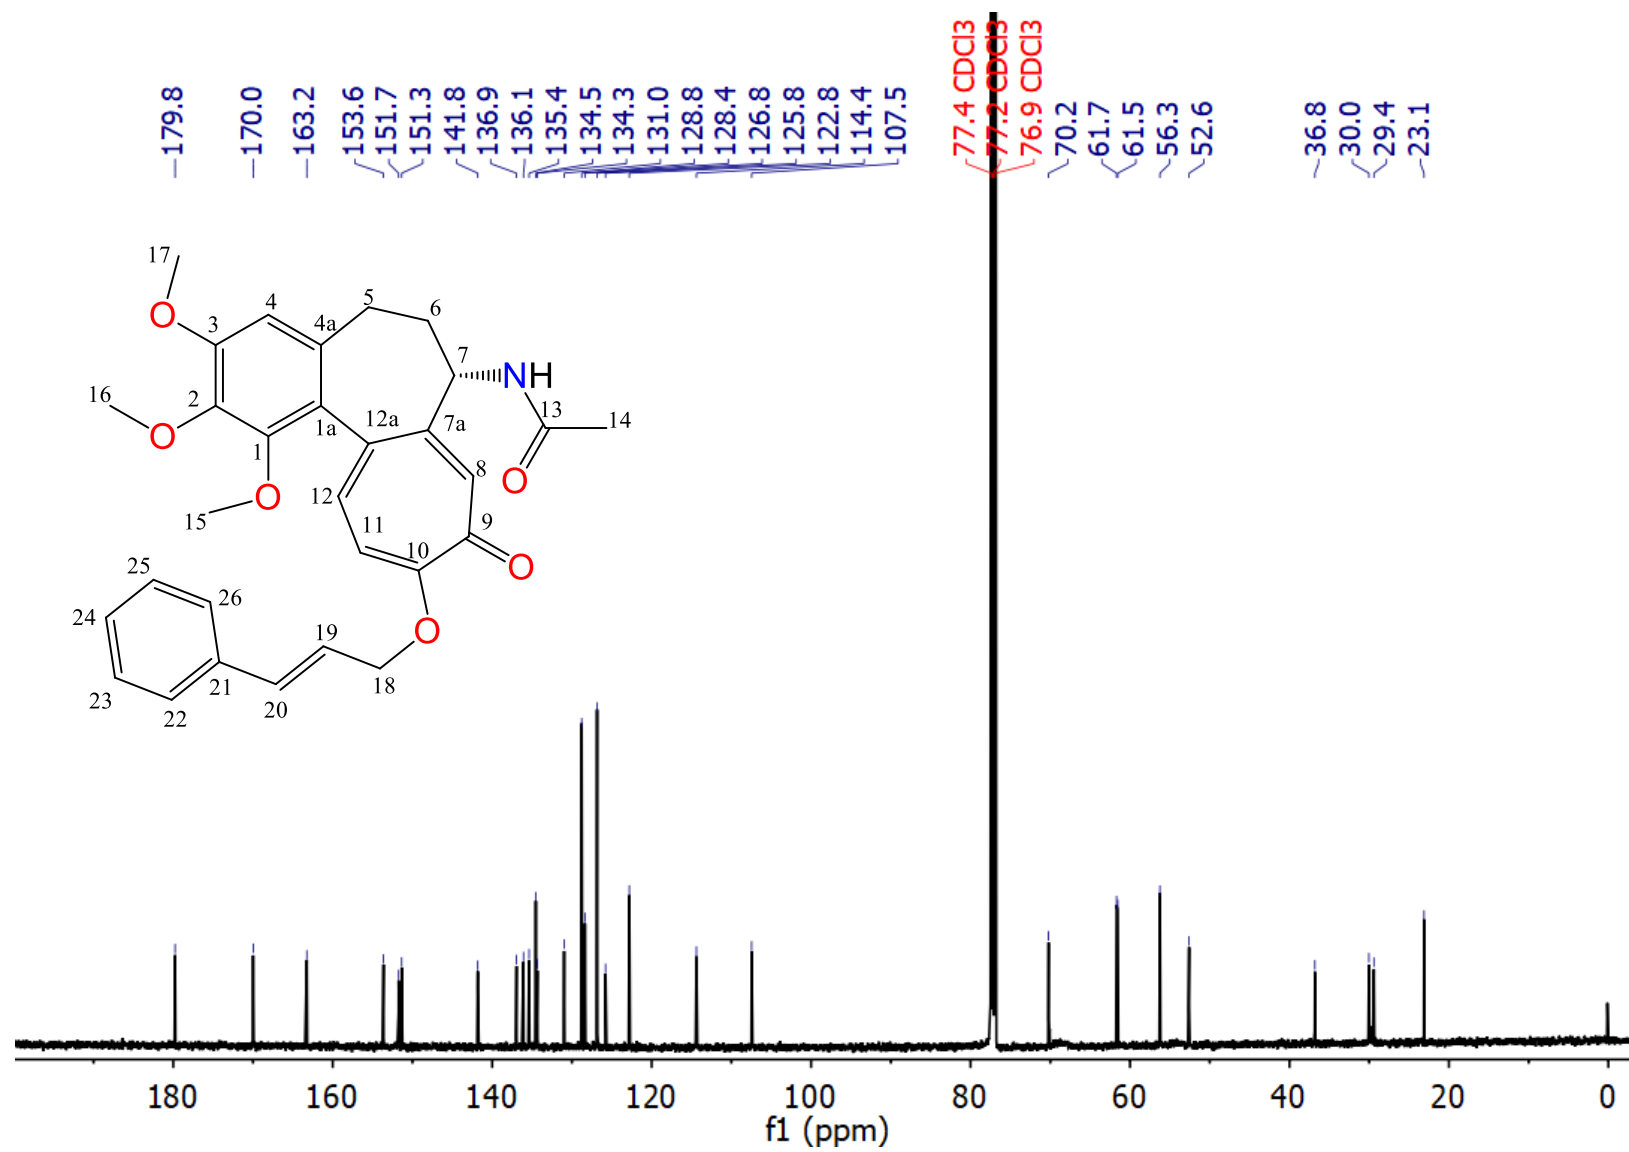

**Figure 75S.**  $^{13}\text{C}$  NMR spectrum of compound **4c** in  $\text{CDCl}_3$ .

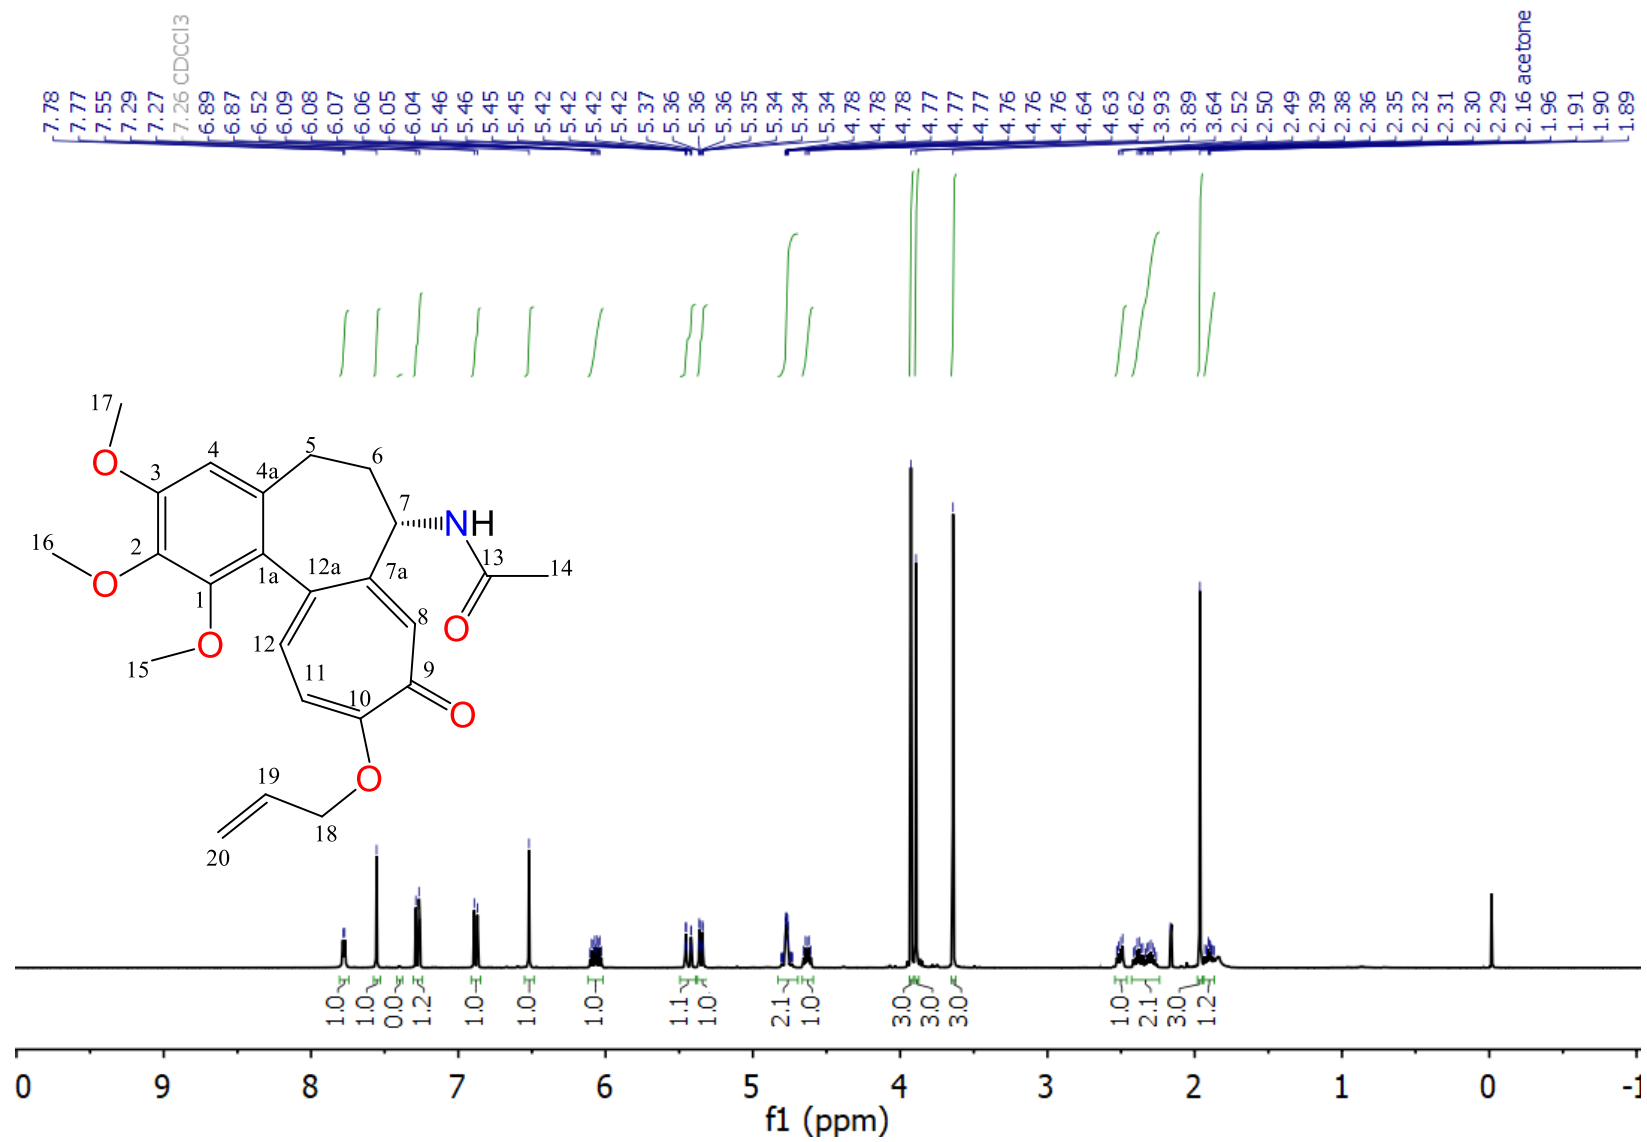

**Figure 76S.** <sup>1</sup>H NMR spectrum of compound **4d** in CDCl<sub>3</sub>.

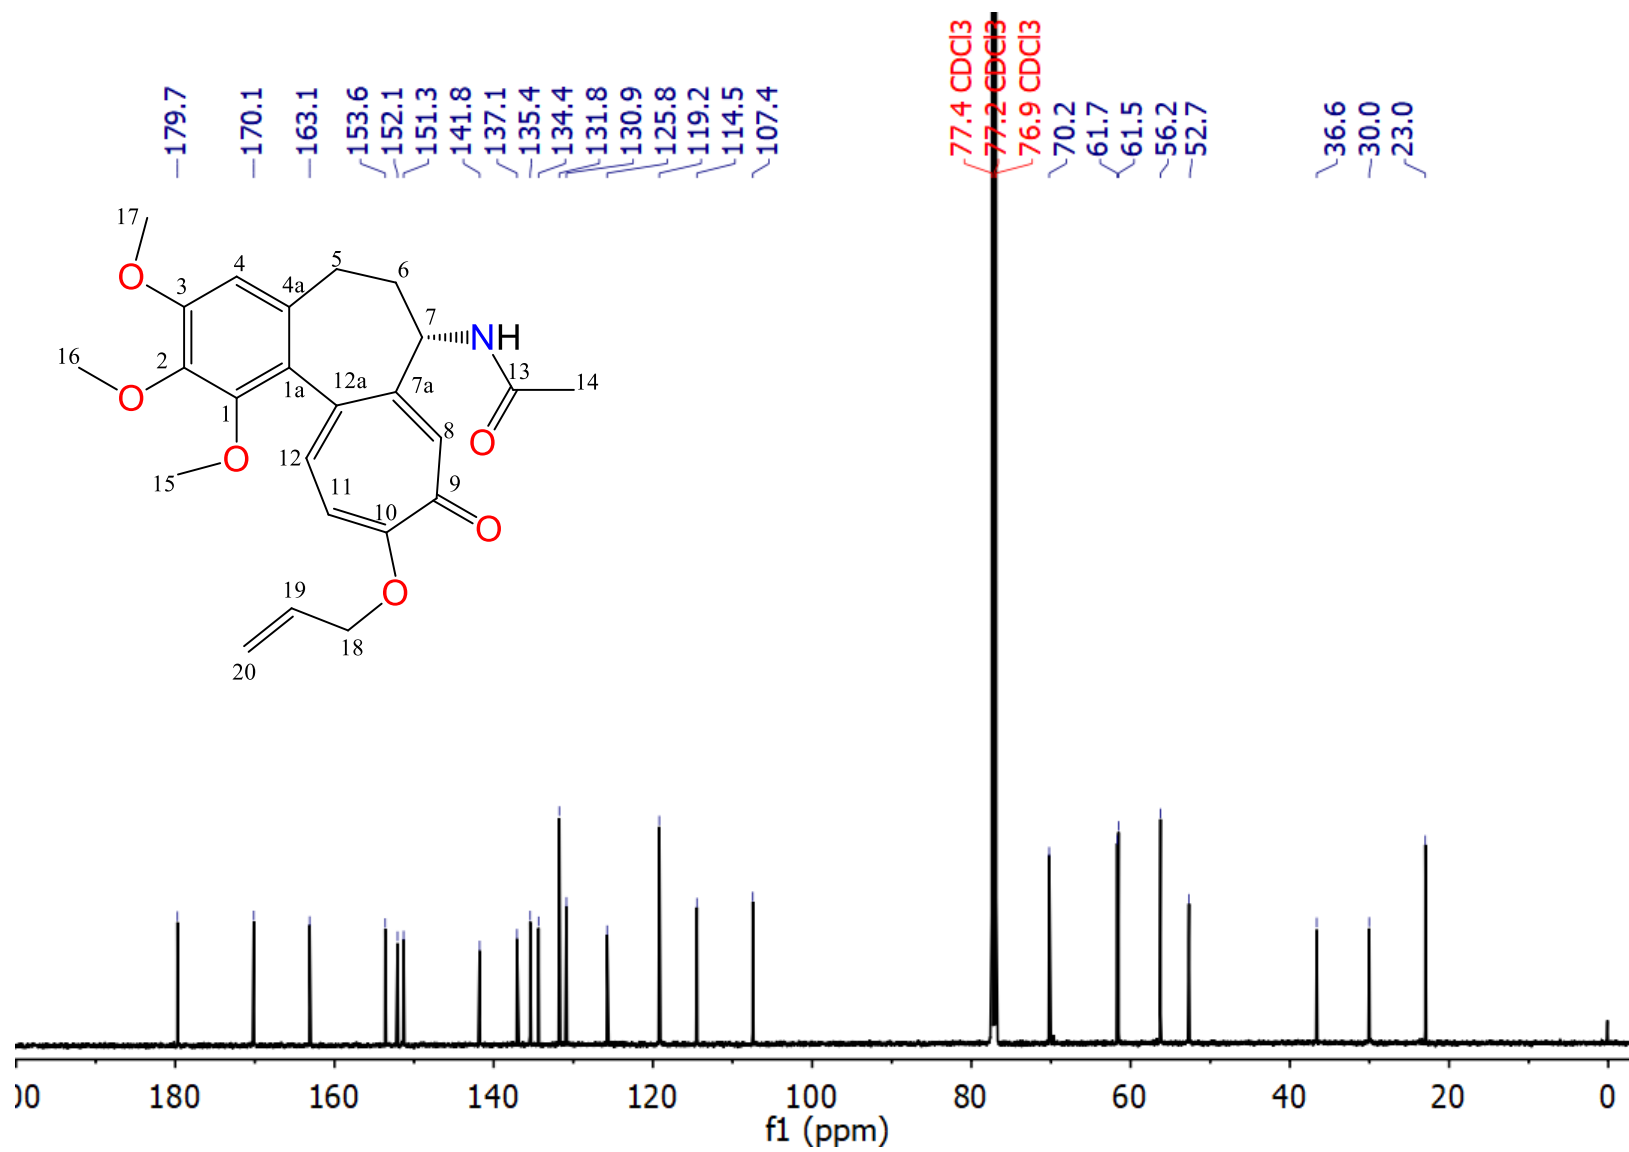

**Figure 77S.**  $^{13}\text{C}$  NMR spectrum of compound **4d** in  $\text{CDCl}_3$ .

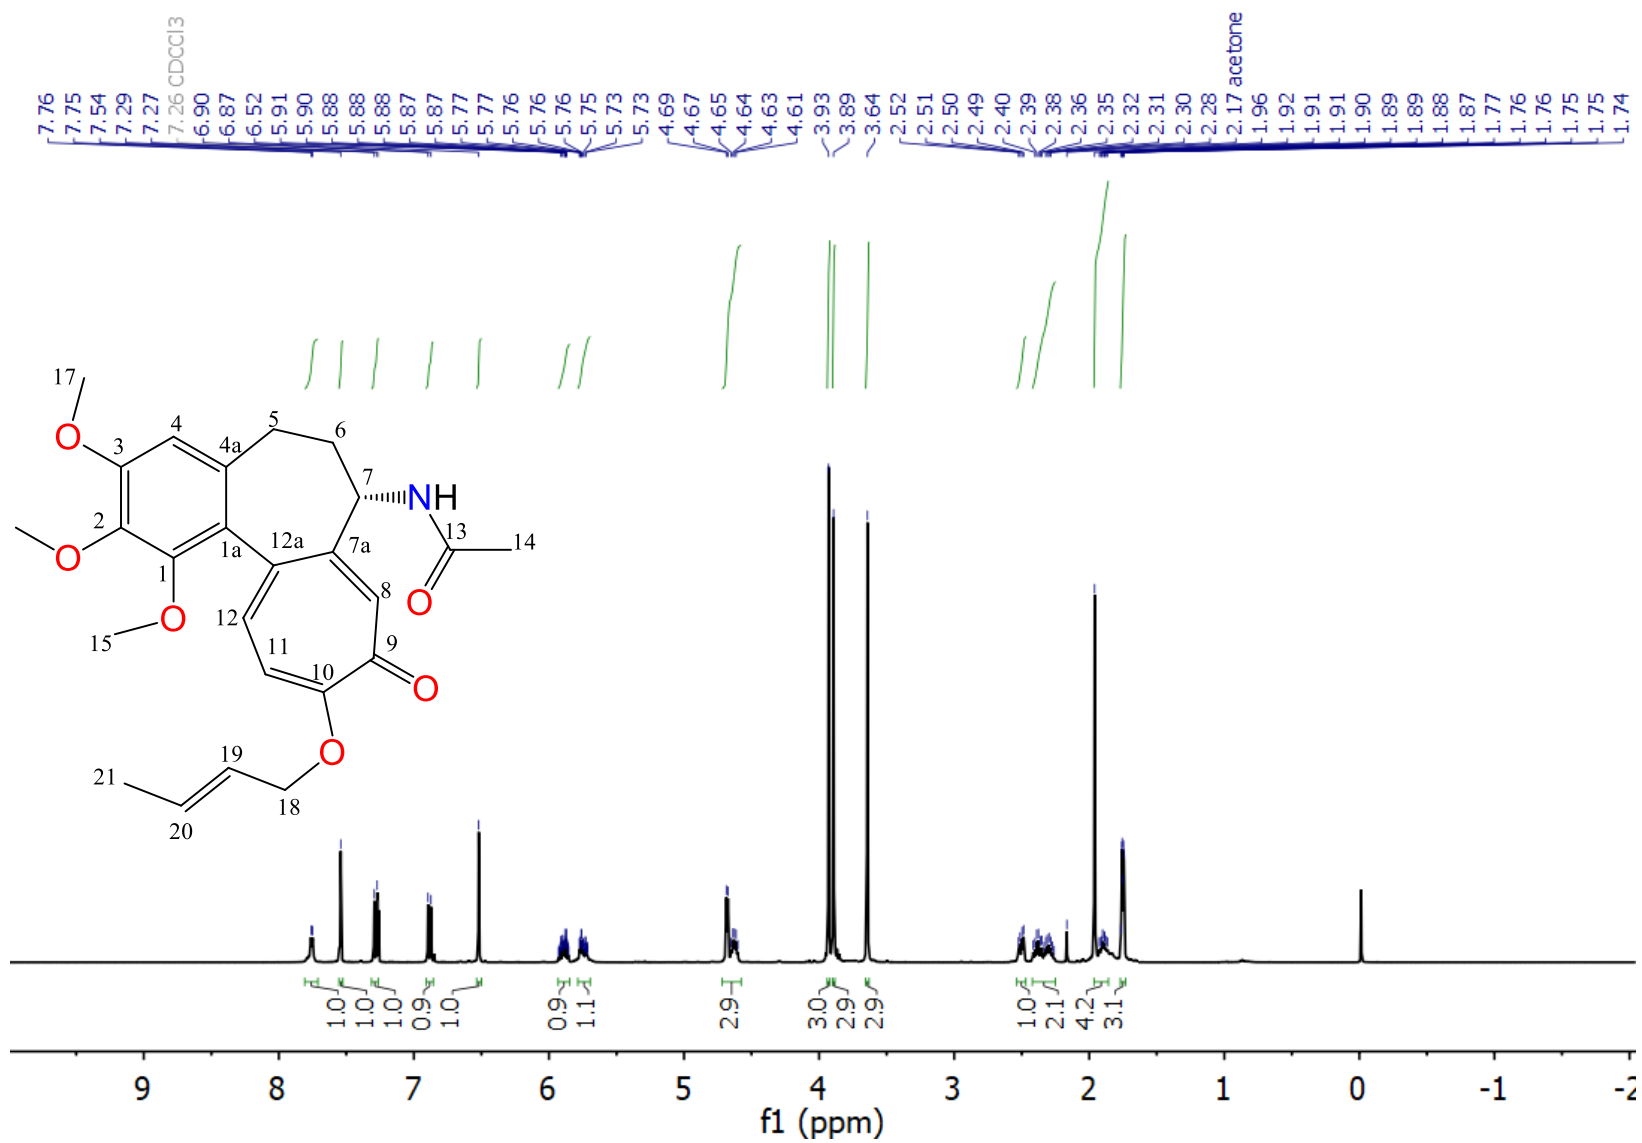

**Figure 78S.** <sup>1</sup>H NMR spectrum of compound **4e** in CDCl<sub>3</sub>.

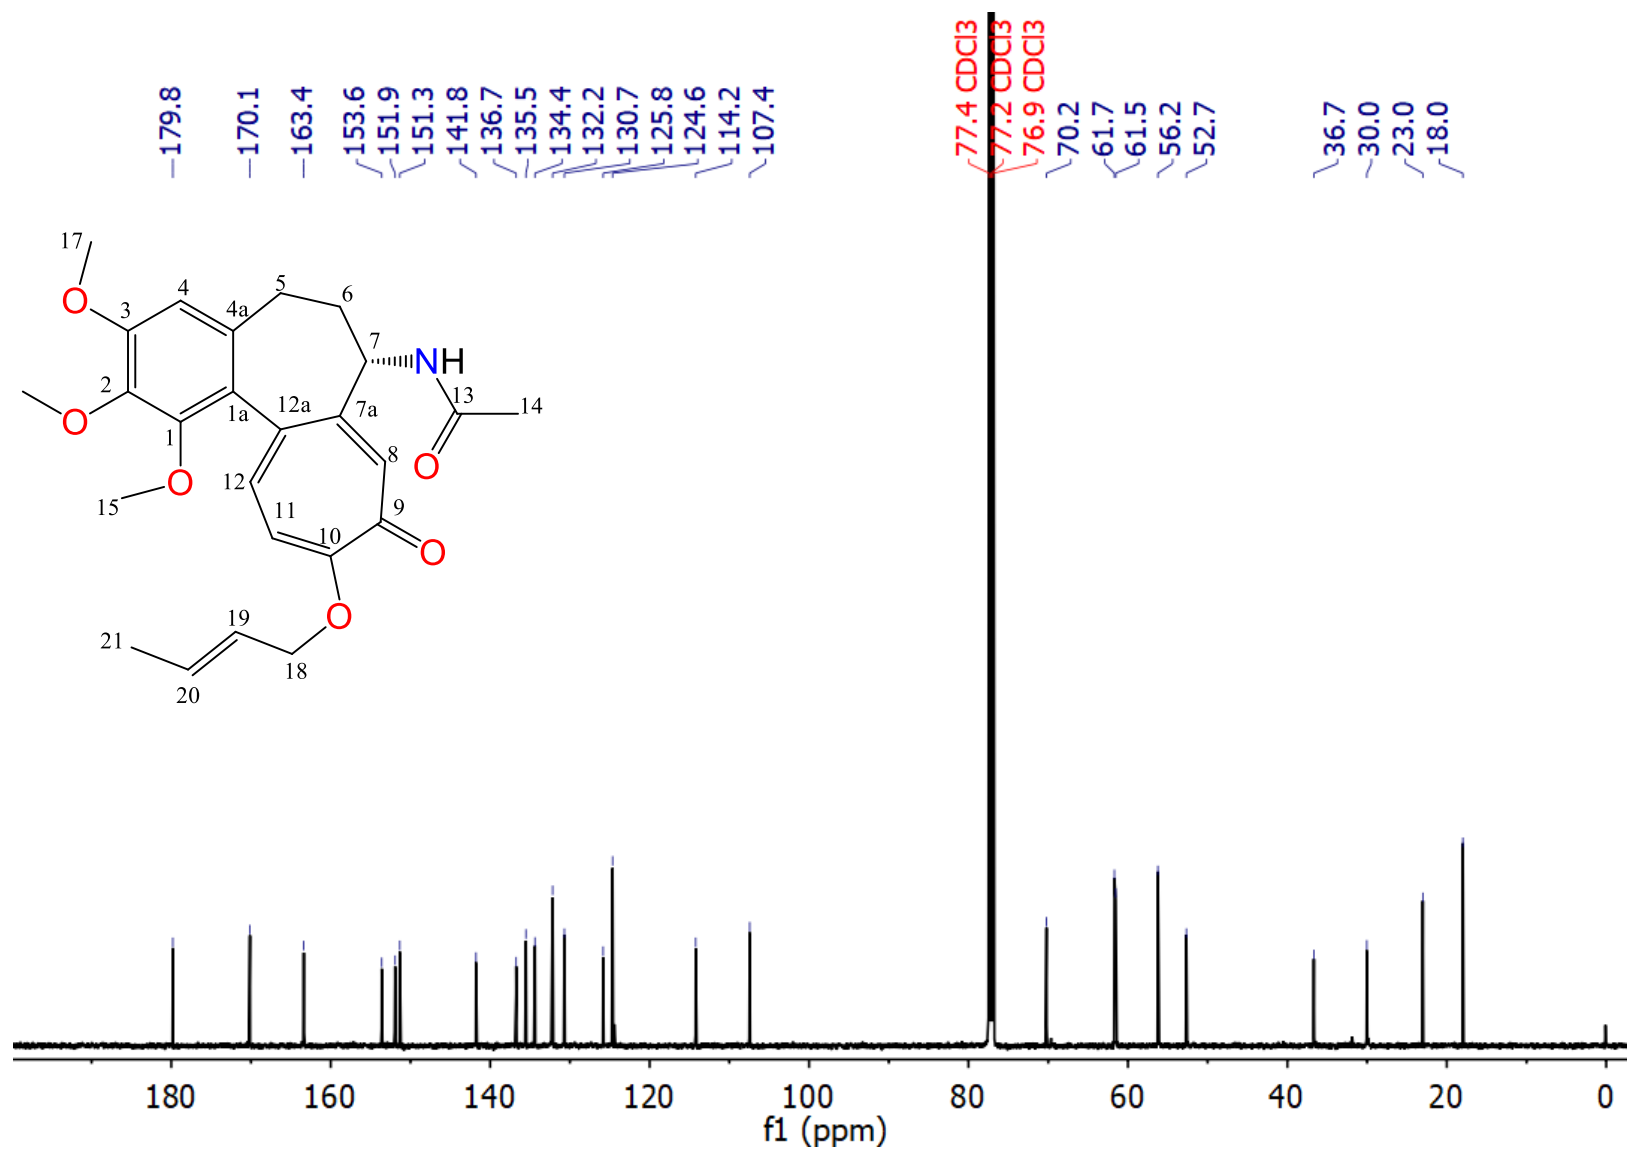

**Figure 79S.**  $^{13}\text{C}$  NMR spectrum of compound **4e** in  $\text{CDCl}_3$ .

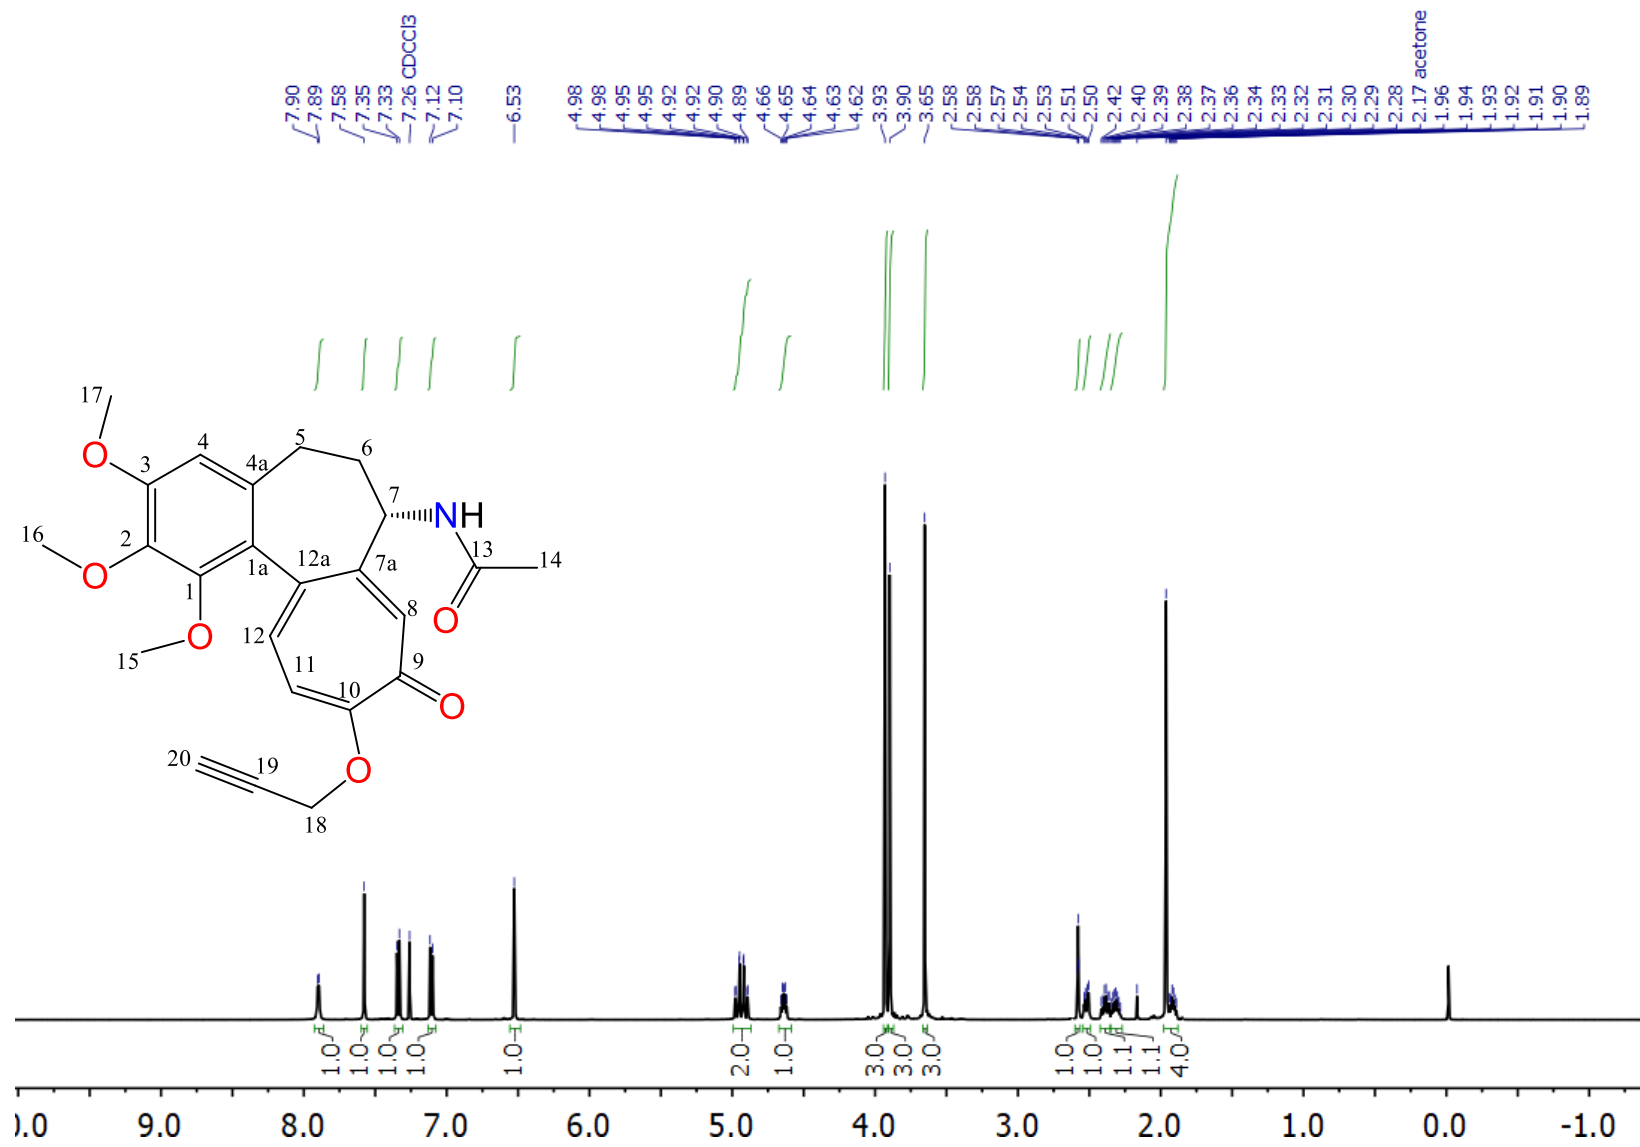

Figure 80S. <sup>1</sup>H NMR spectrum of compound 4f in CDCl<sub>3</sub>.

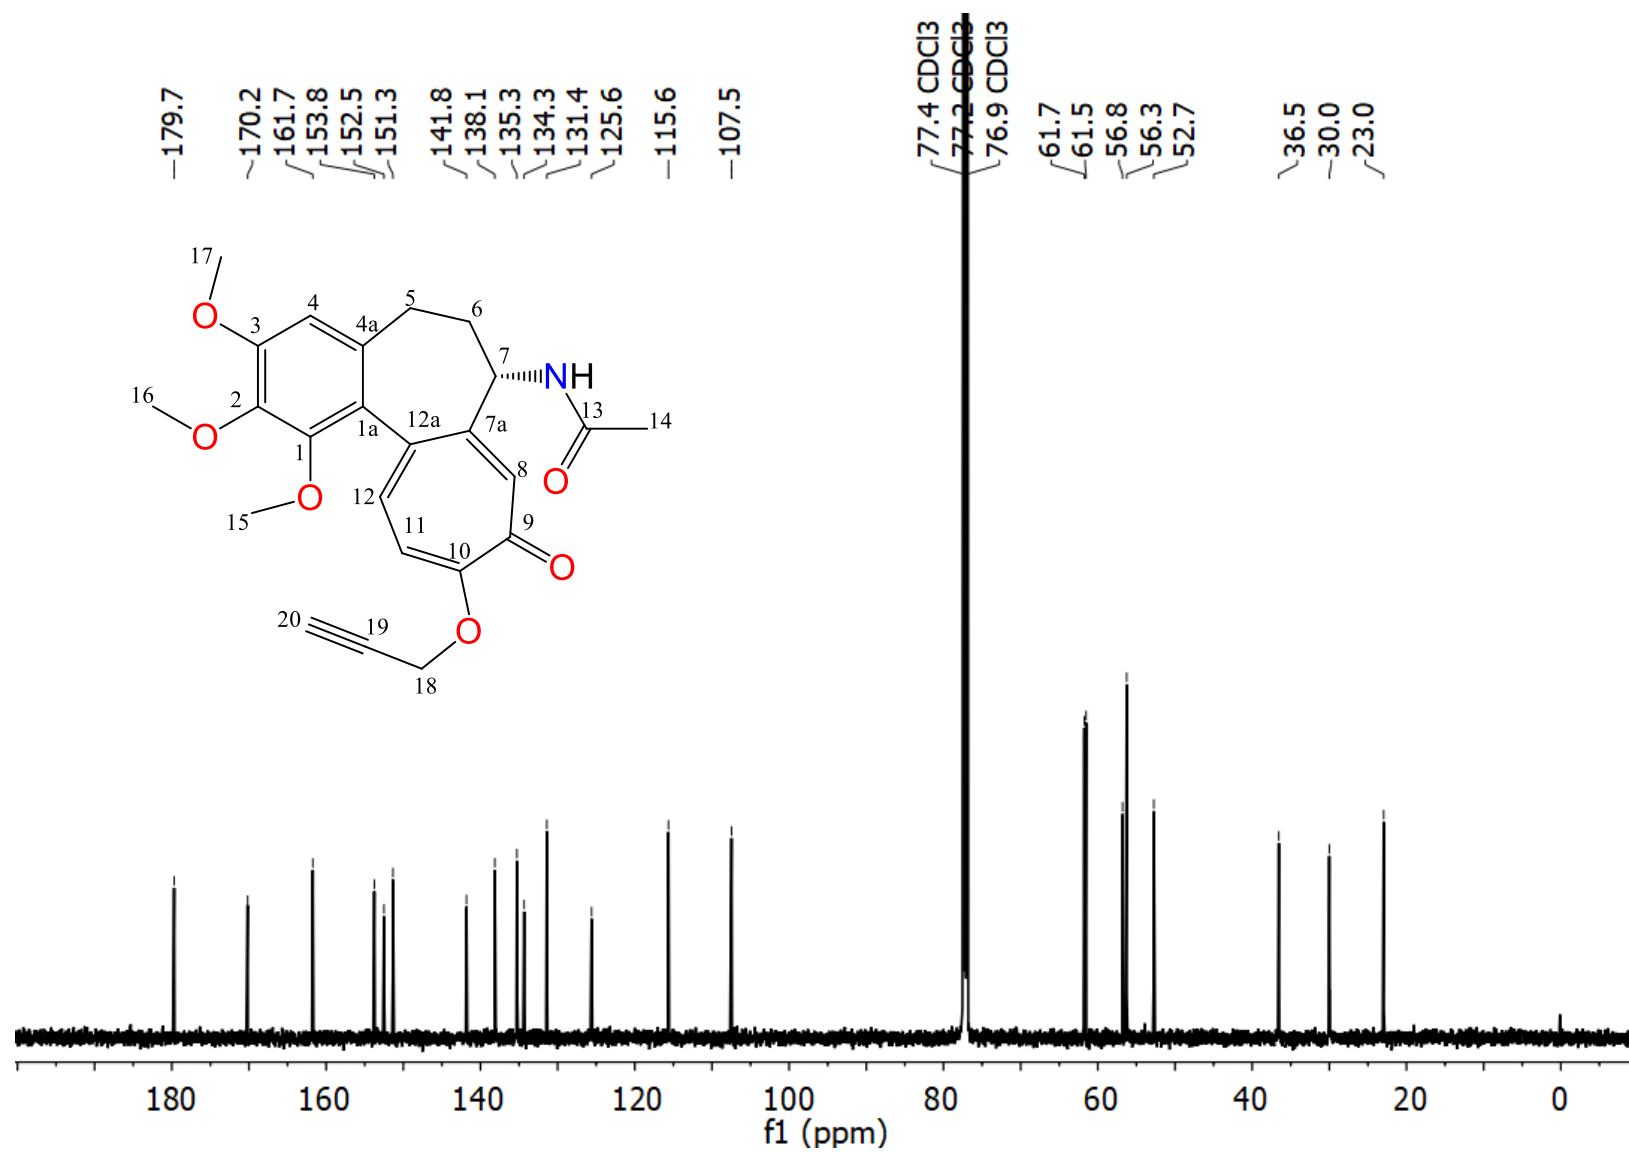

**Figure 81S.**  $^{13}\text{C}$  NMR spectrum of compound **4f** in  $\text{CDCl}_3$ .



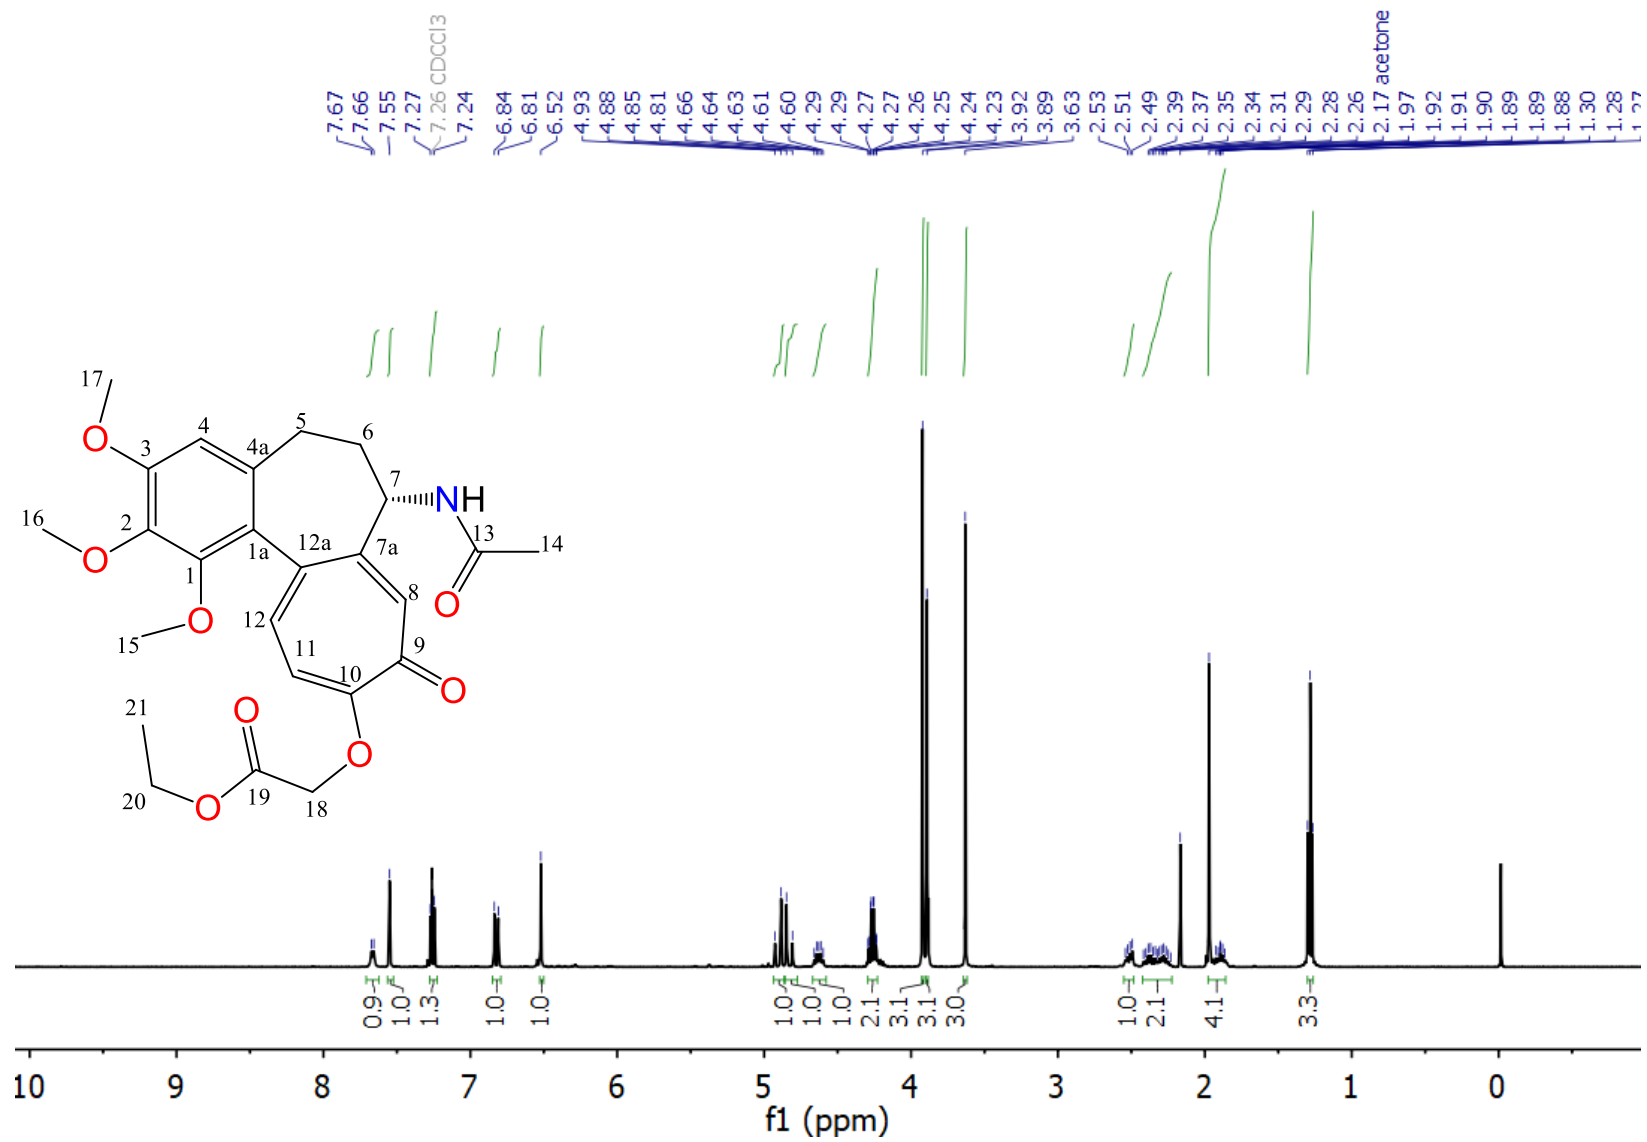

**Figure 82S.** <sup>1</sup>H NMR spectrum of compound **4g** in CDCl<sub>3</sub>.

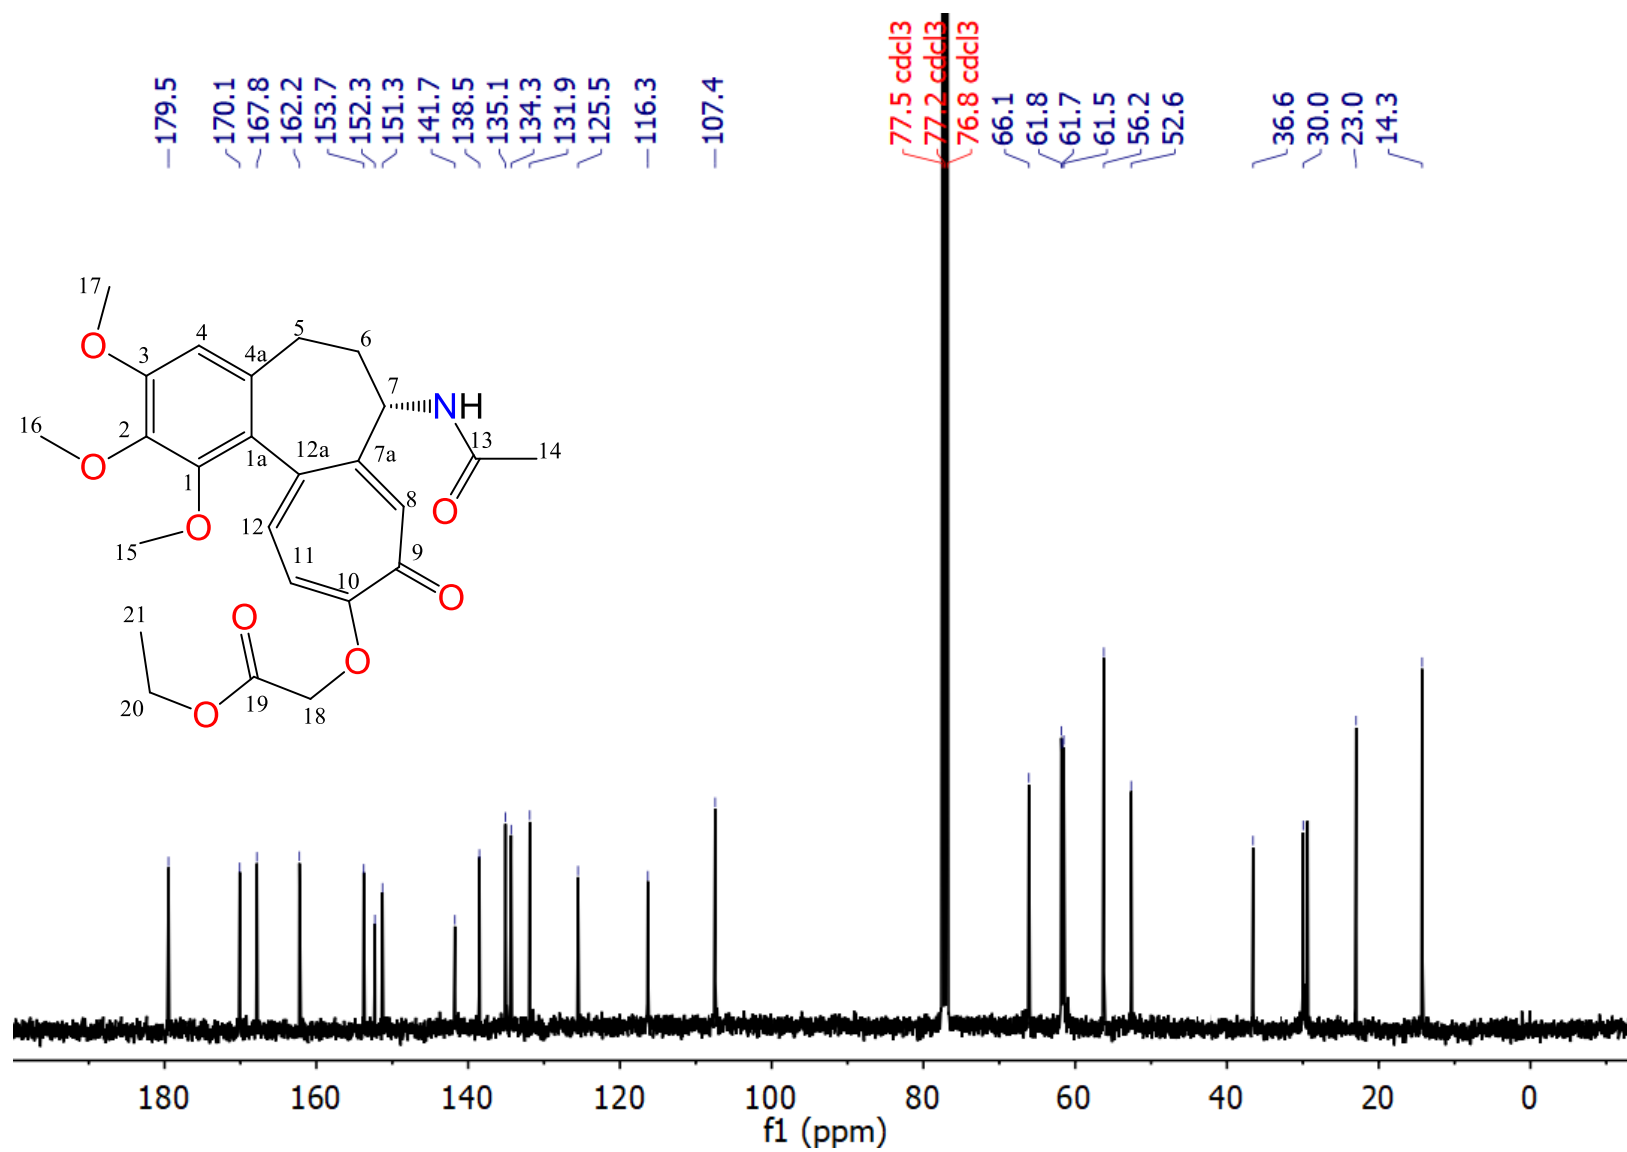

**Figure 83S.**  $^{13}\text{C}$  NMR spectrum of compound **4g** in  $\text{CDCl}_3$ .

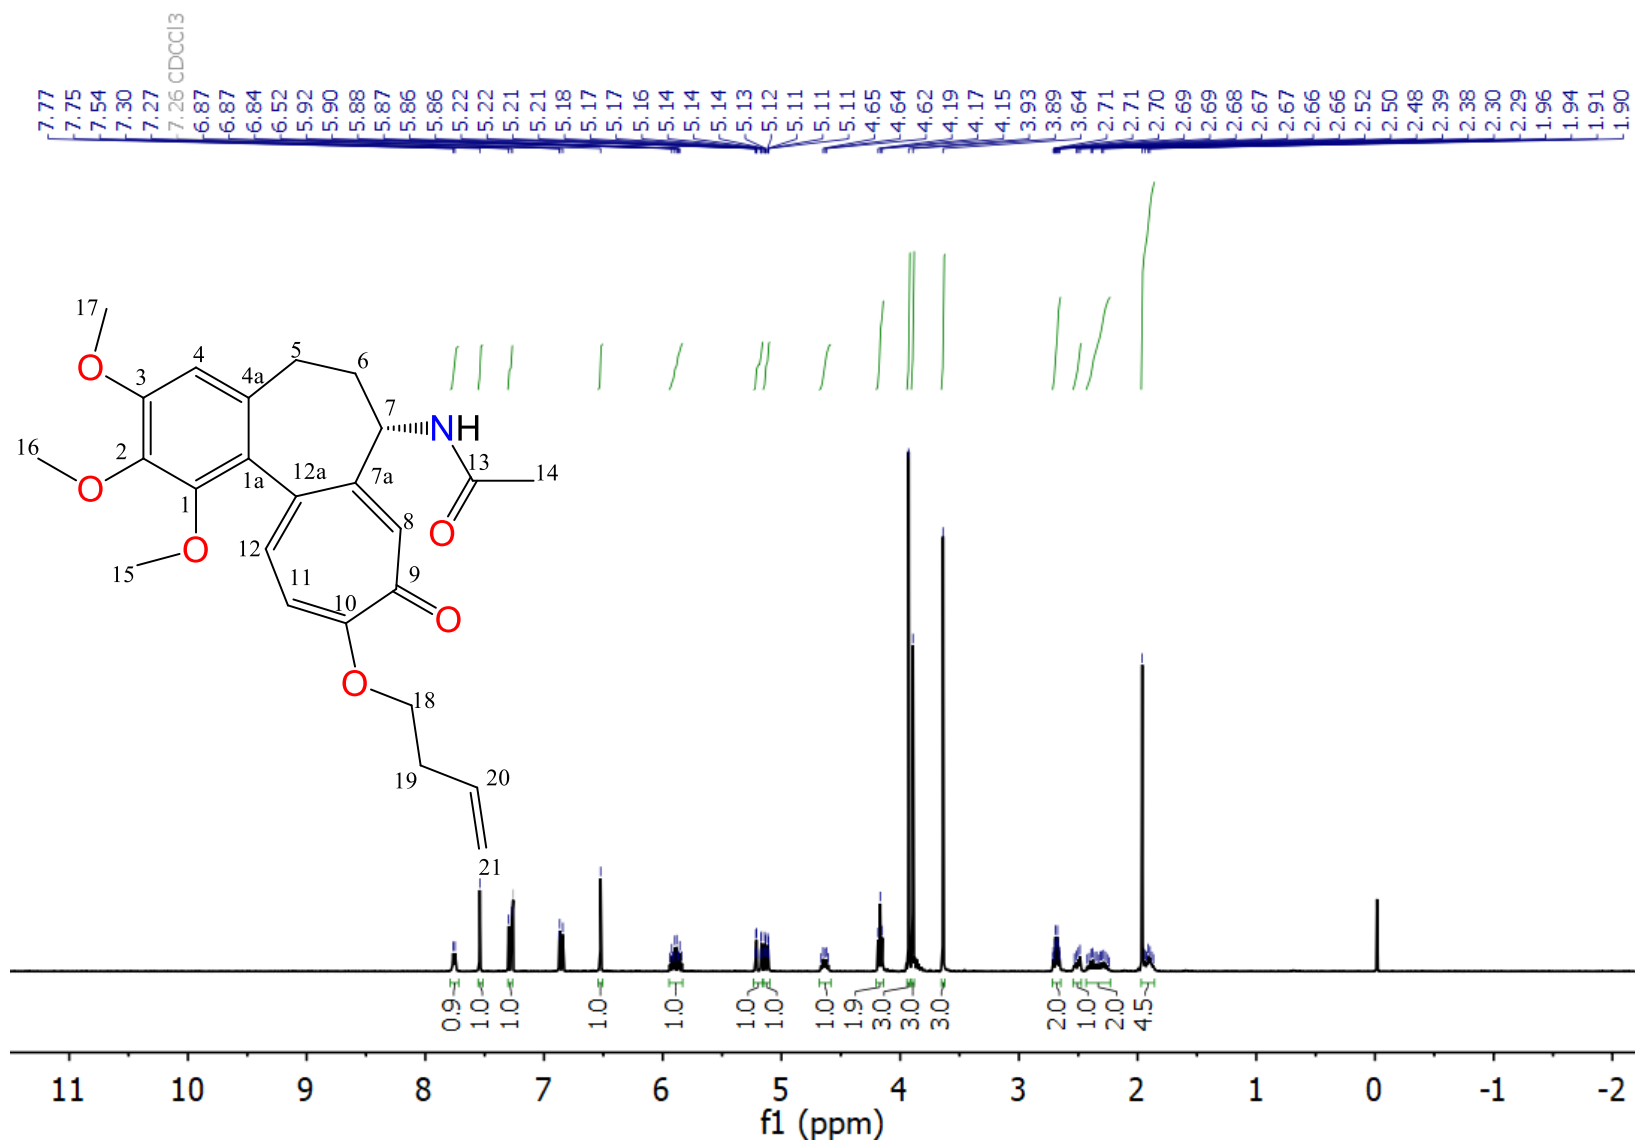

**Figure 84S.** <sup>1</sup>H NMR spectrum of compound **4h** in CDCl<sub>3</sub>.

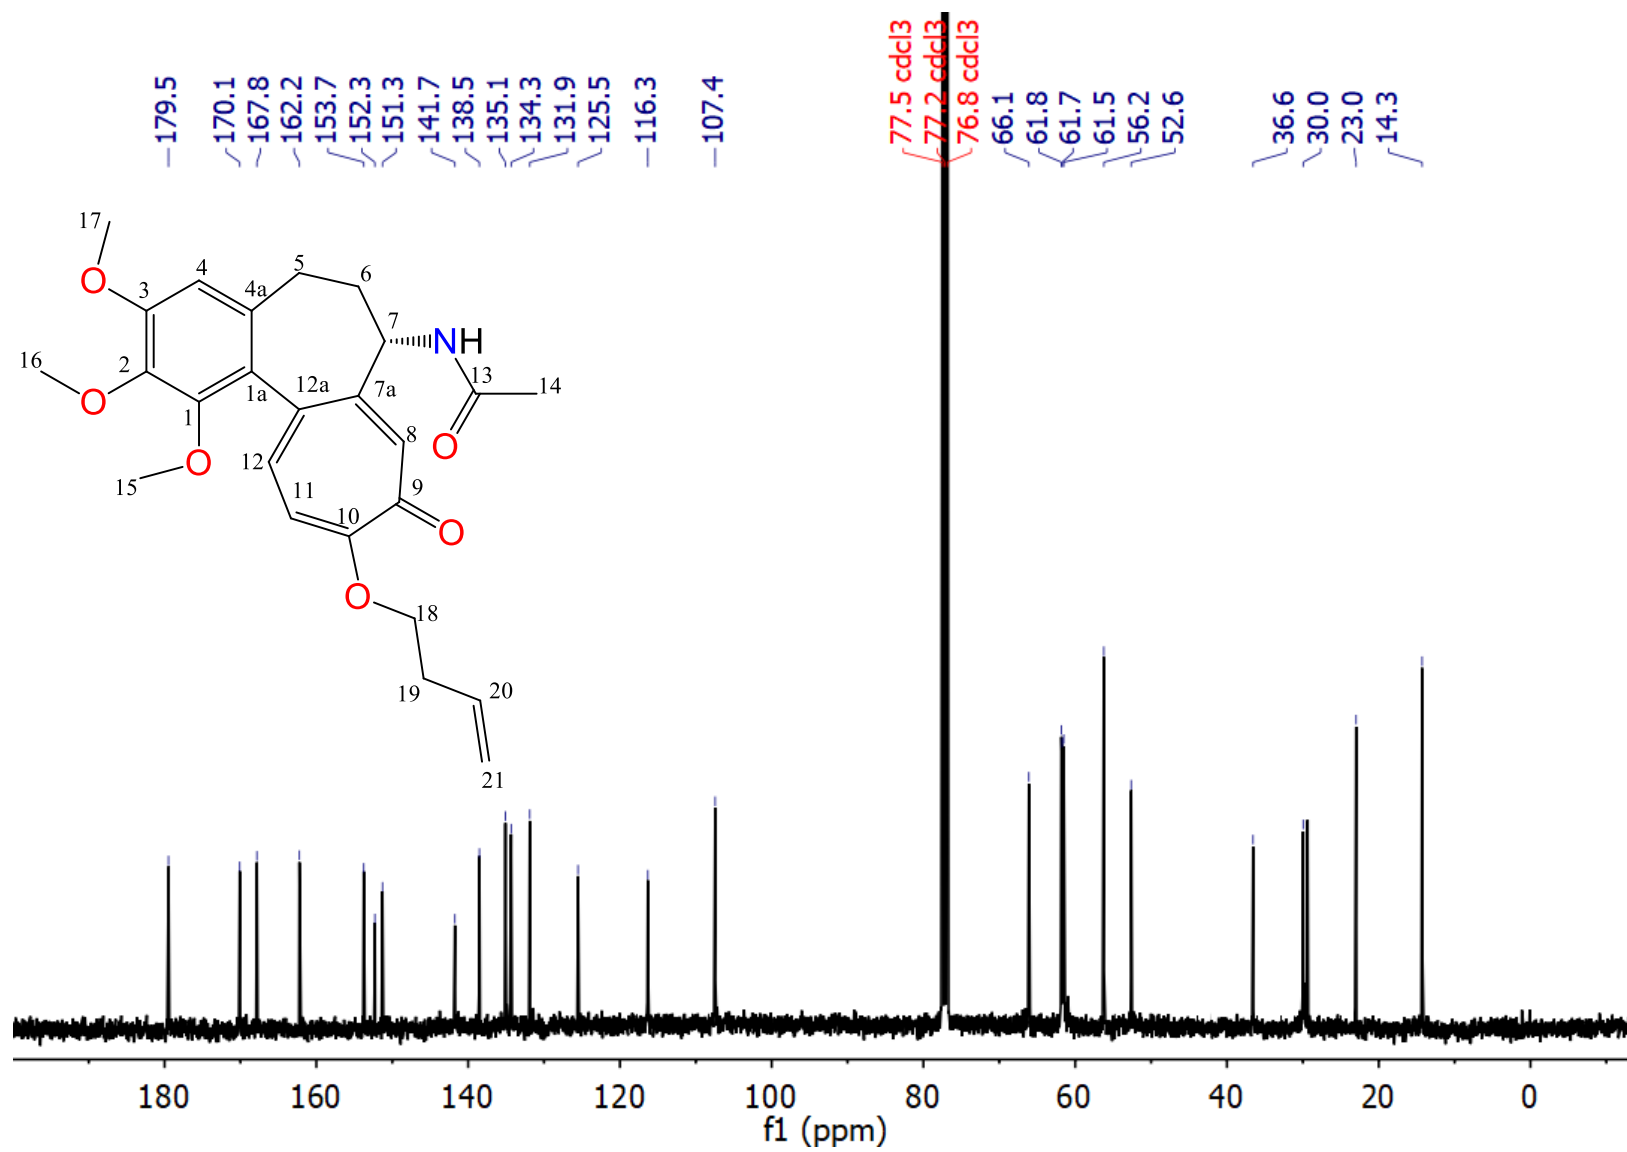

**Figure 85S.**  $^{13}\text{C}$  NMR spectrum of compound **4h** in  $\text{CDCl}_3$ .

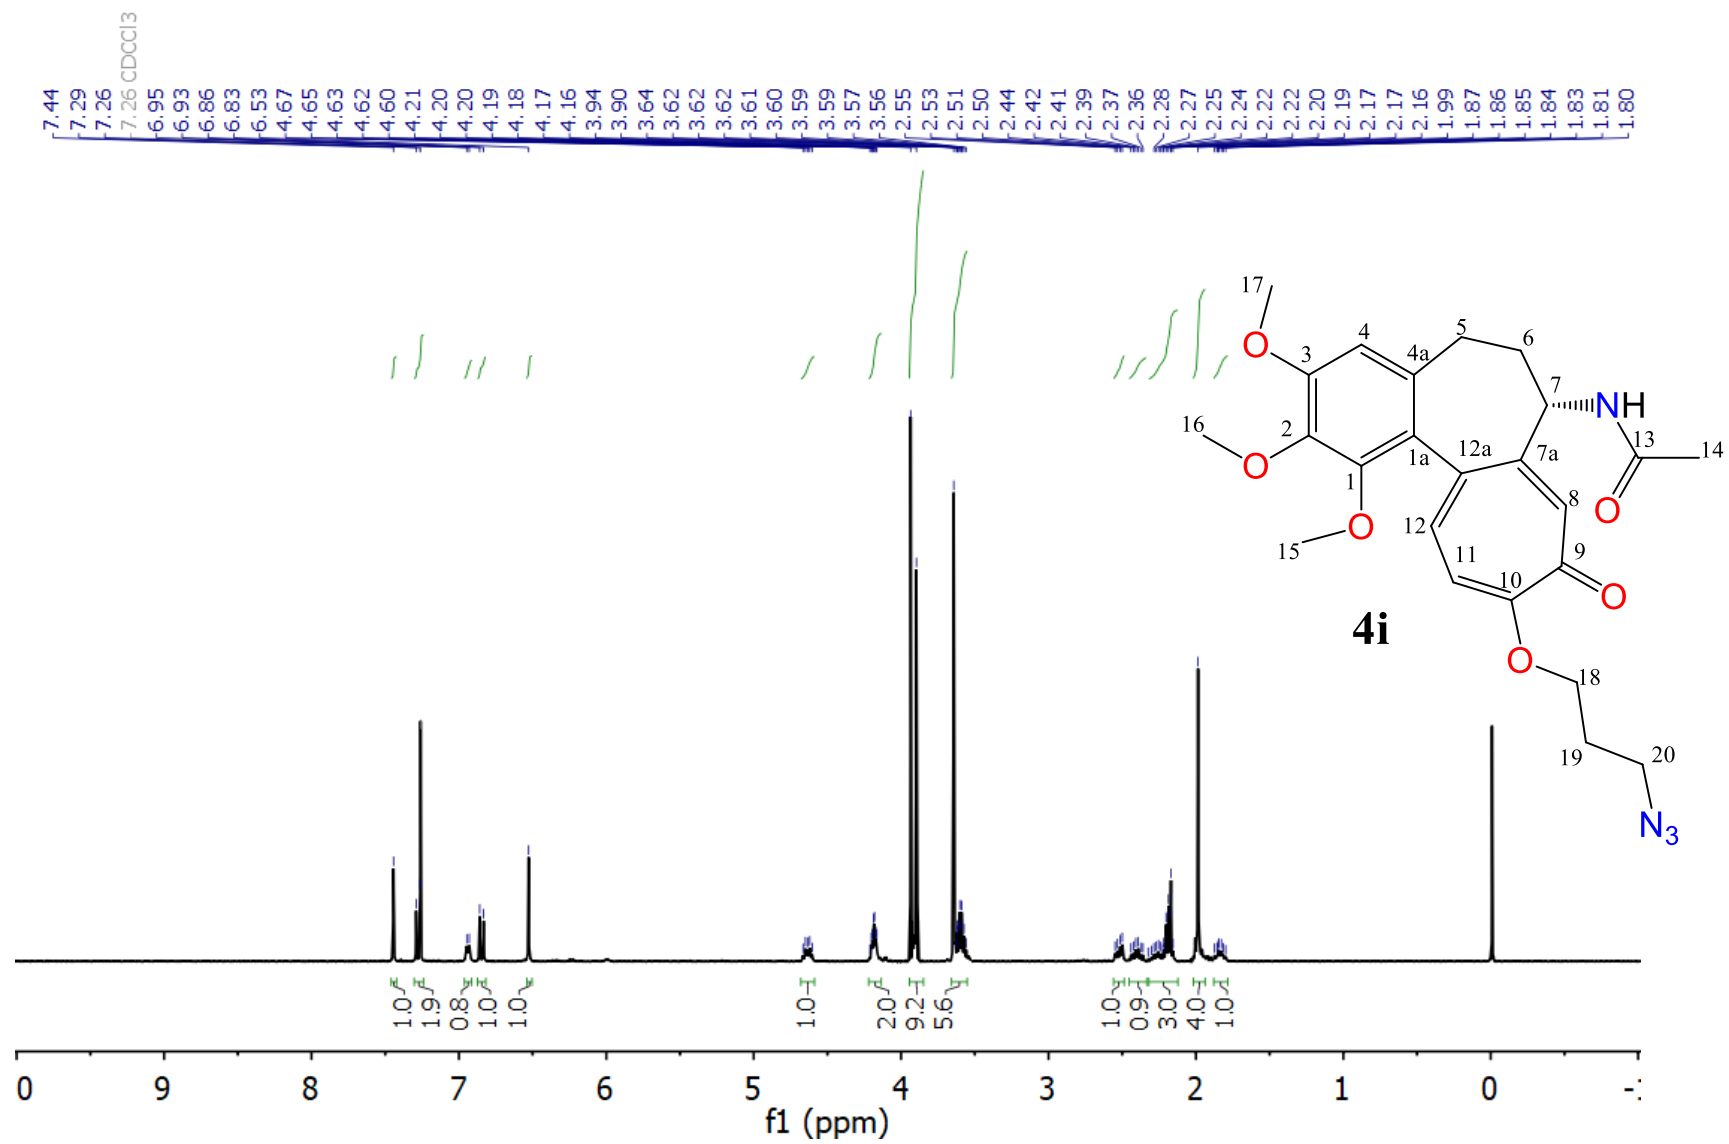

**Figure 86S.** <sup>1</sup>H NMR spectrum of compound **4i** in CDCl<sub>3</sub>.

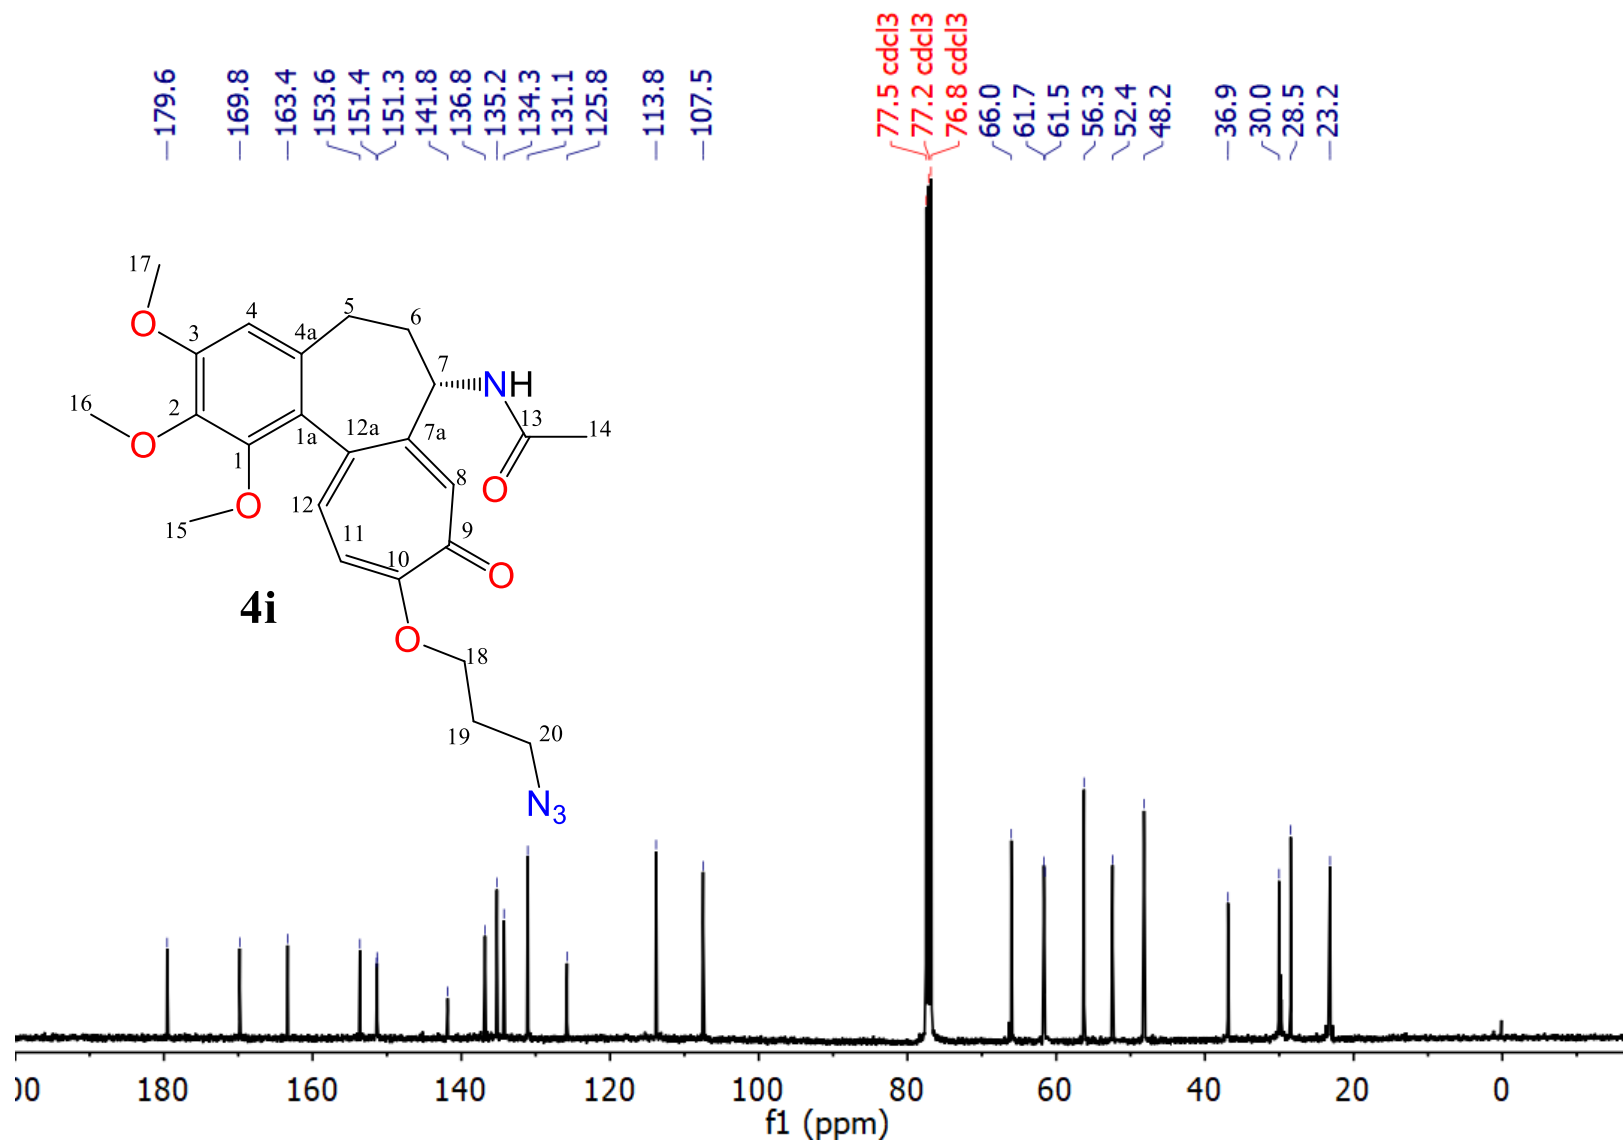

**Figure 87S.**  $^{13}\text{C}$  NMR spectrum of compound **4i** in CDCl<sub>3</sub>.

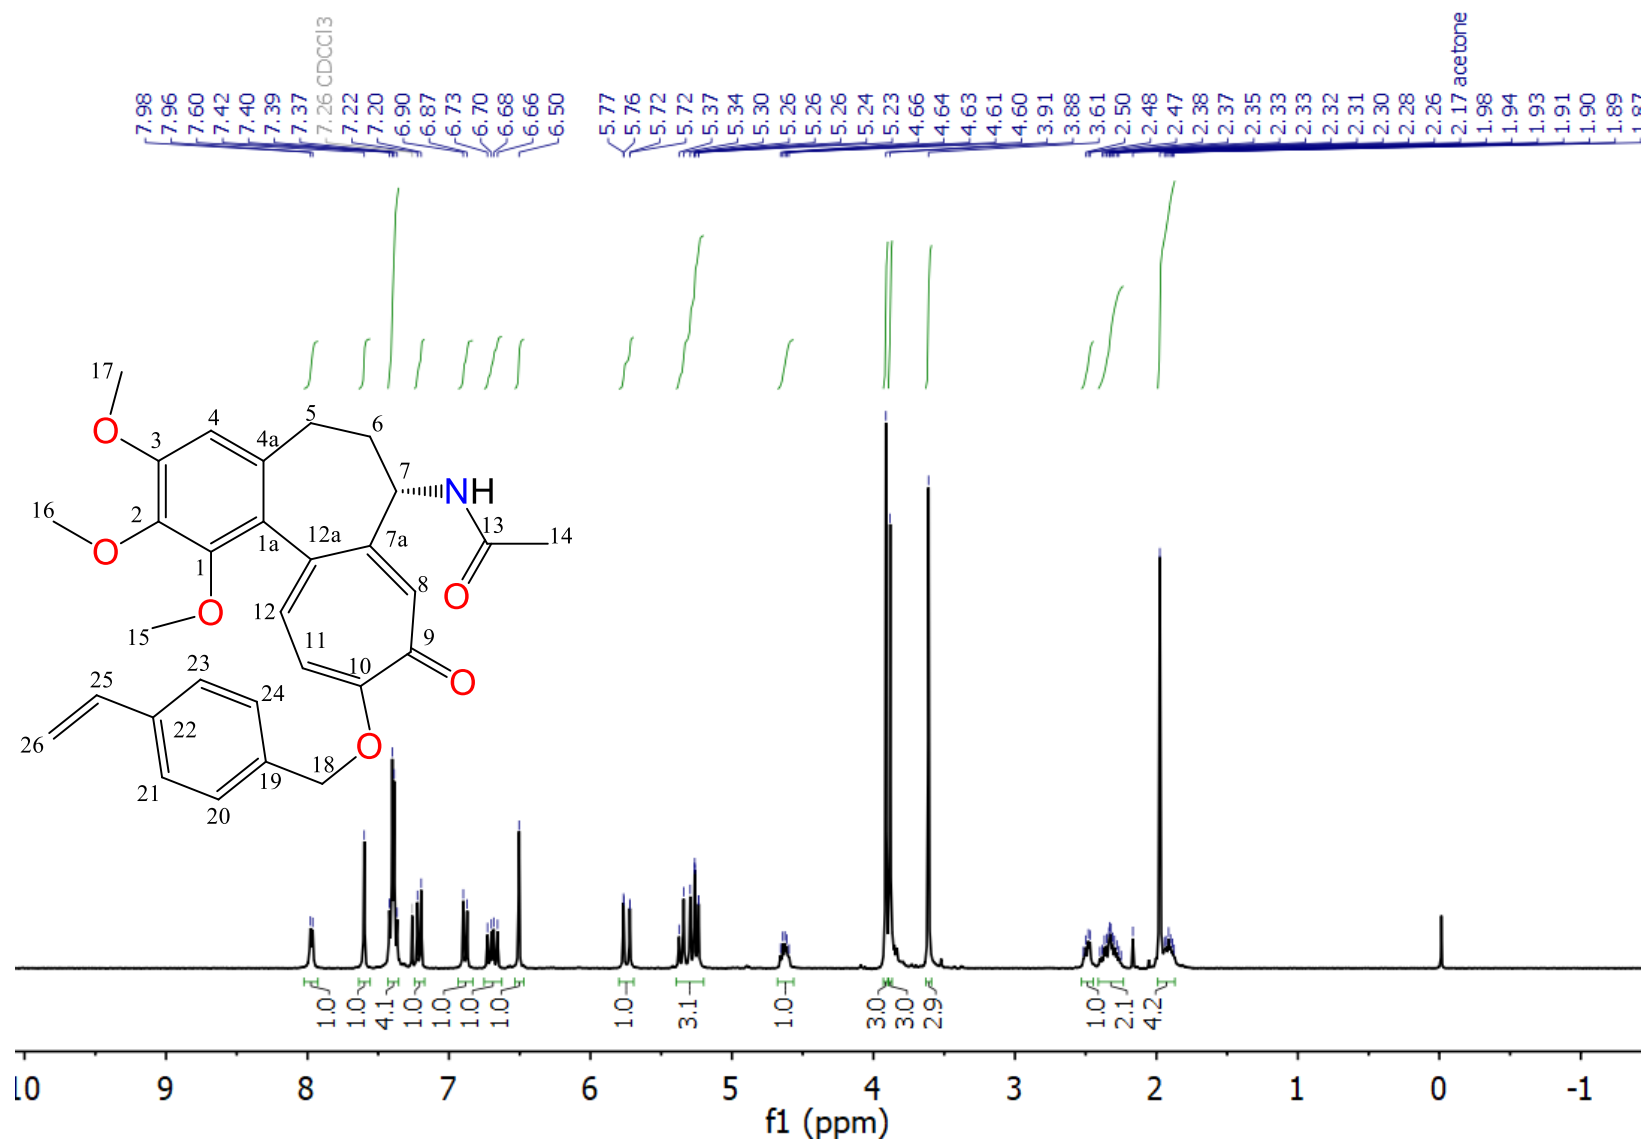

**Figure 88S.** <sup>1</sup>H NMR spectrum of compound **4j** in CDCl<sub>3</sub>.

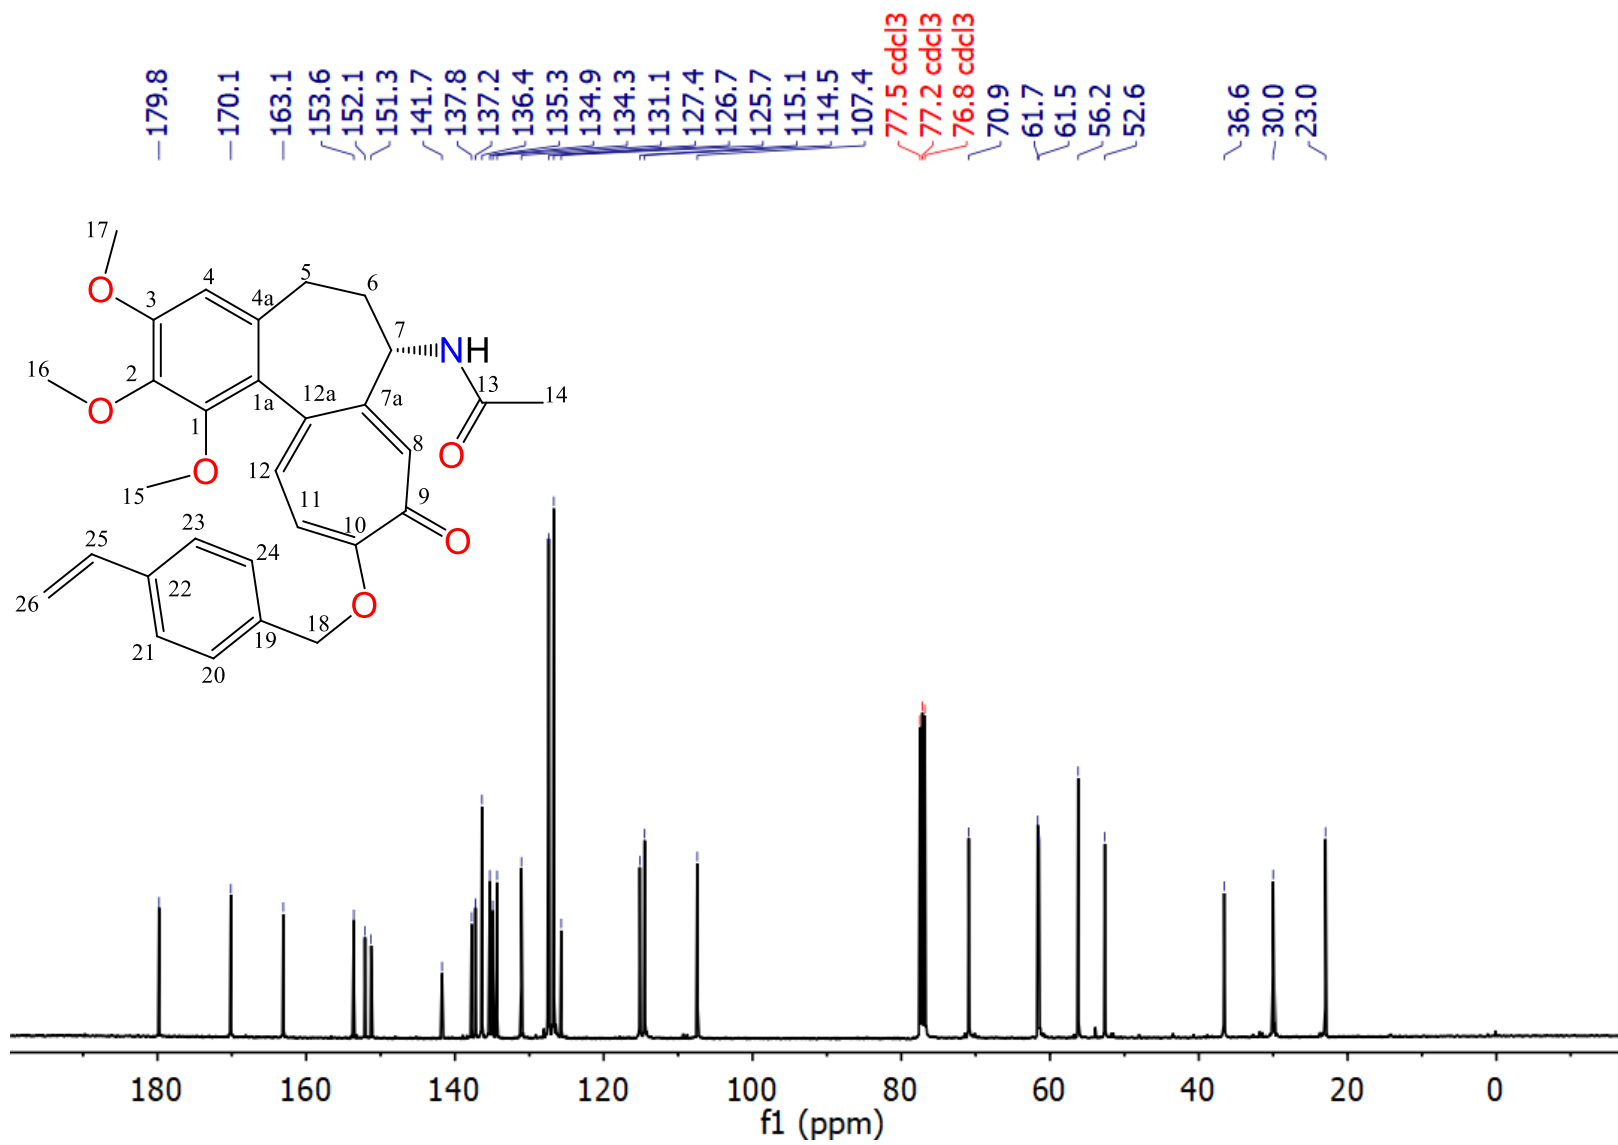

**Figure 89S.** <sup>13</sup>C NMR spectrum of compound **4j** in CDCl<sub>3</sub>.



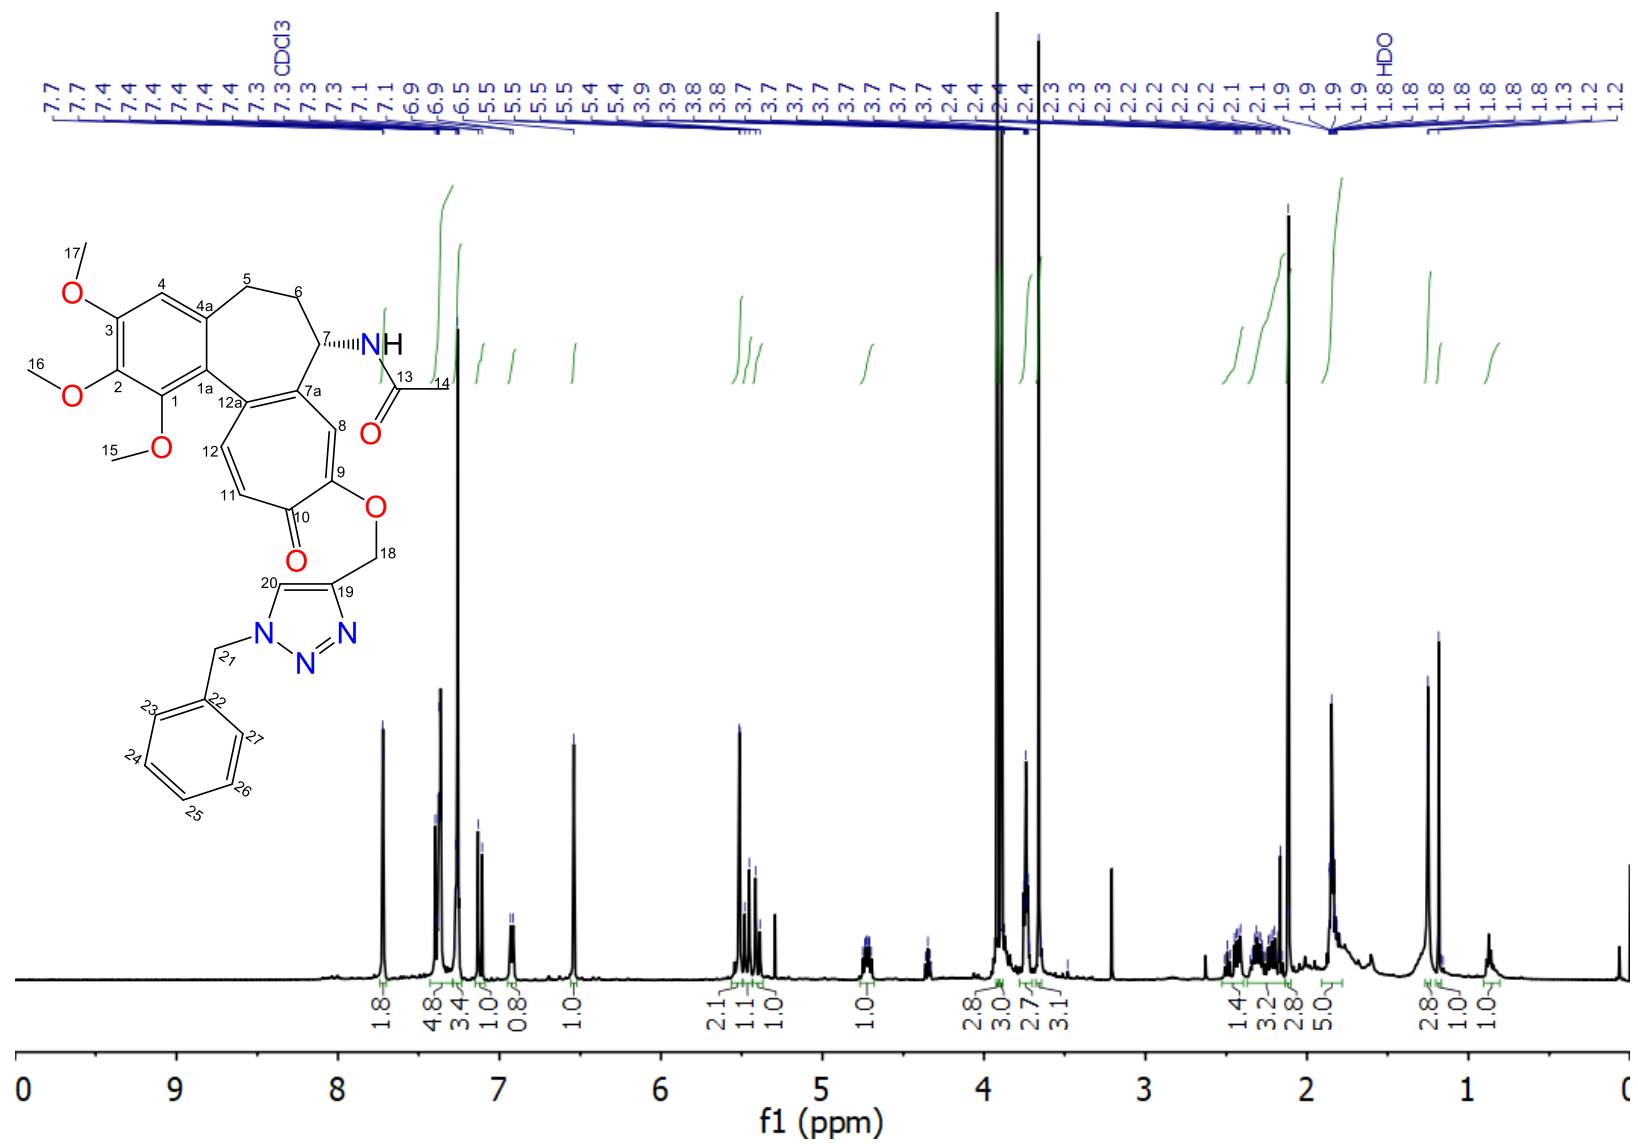

**Figure 90S.** <sup>1</sup>H NMR spectrum of compound **5a** in CDCl<sub>3</sub>.

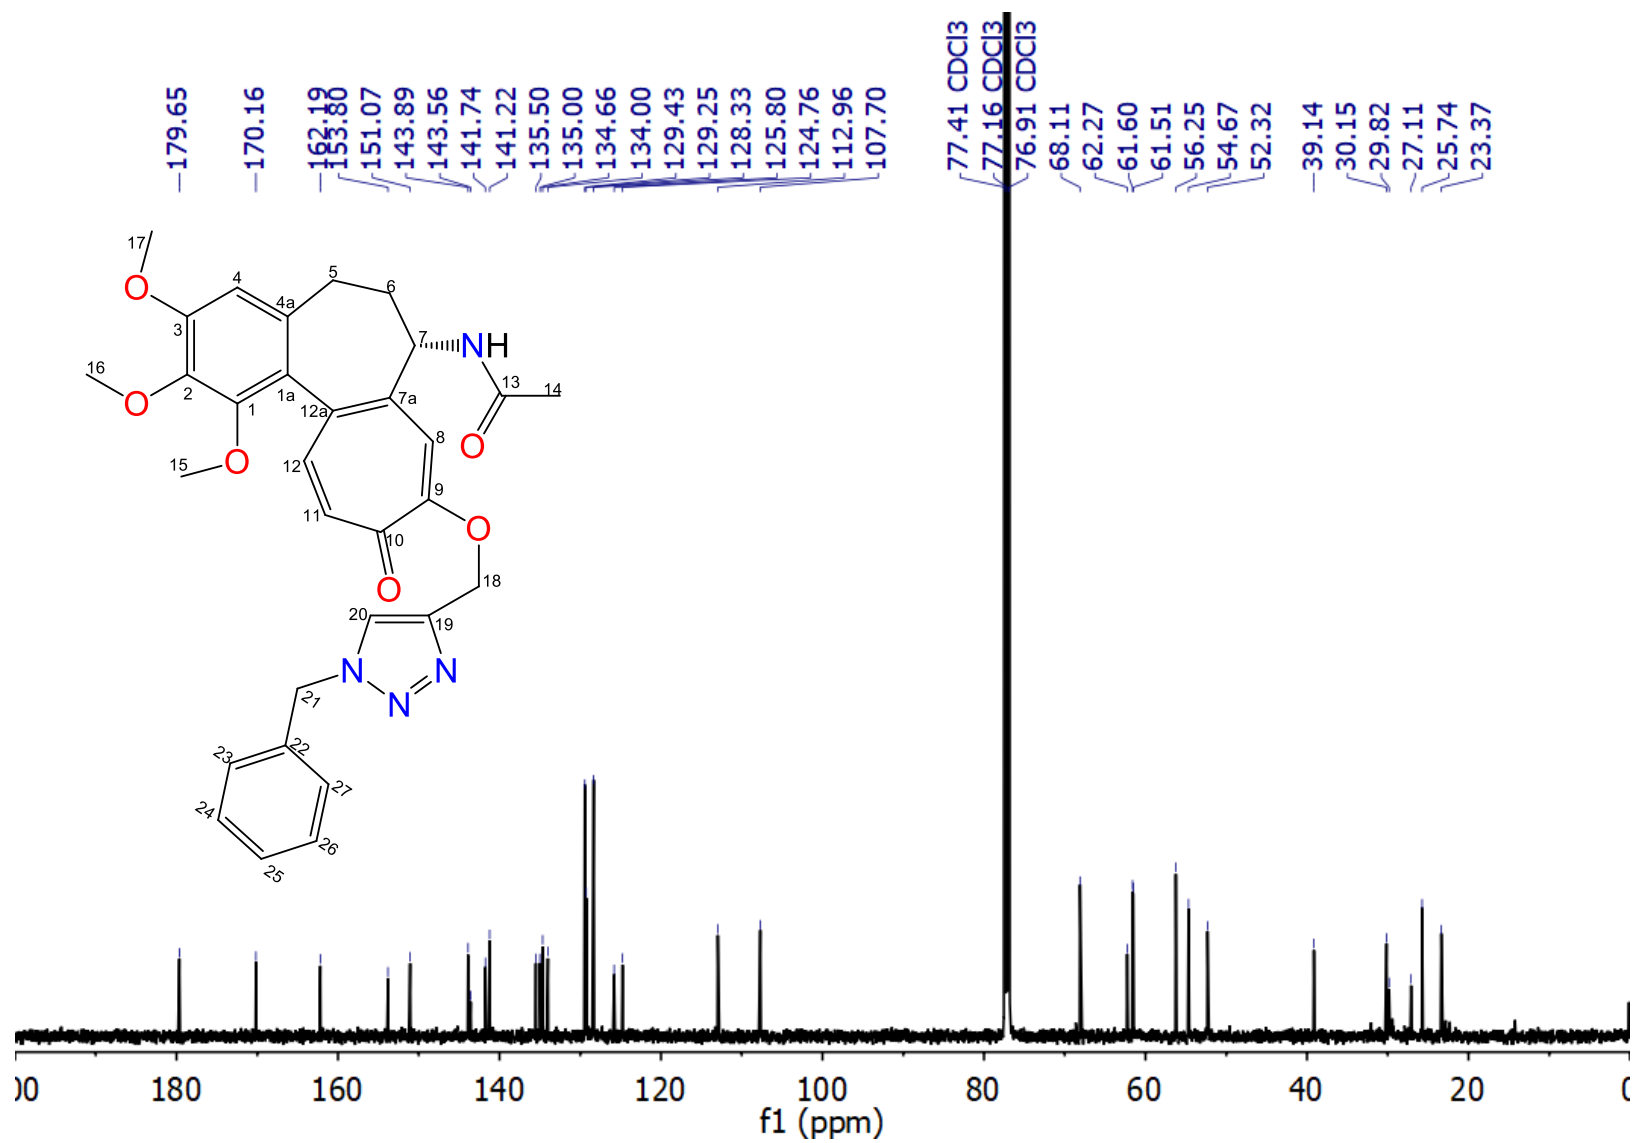

Figure 91S. <sup>13</sup>C NMR spectrum of compound 5a in CDCl<sub>3</sub>.

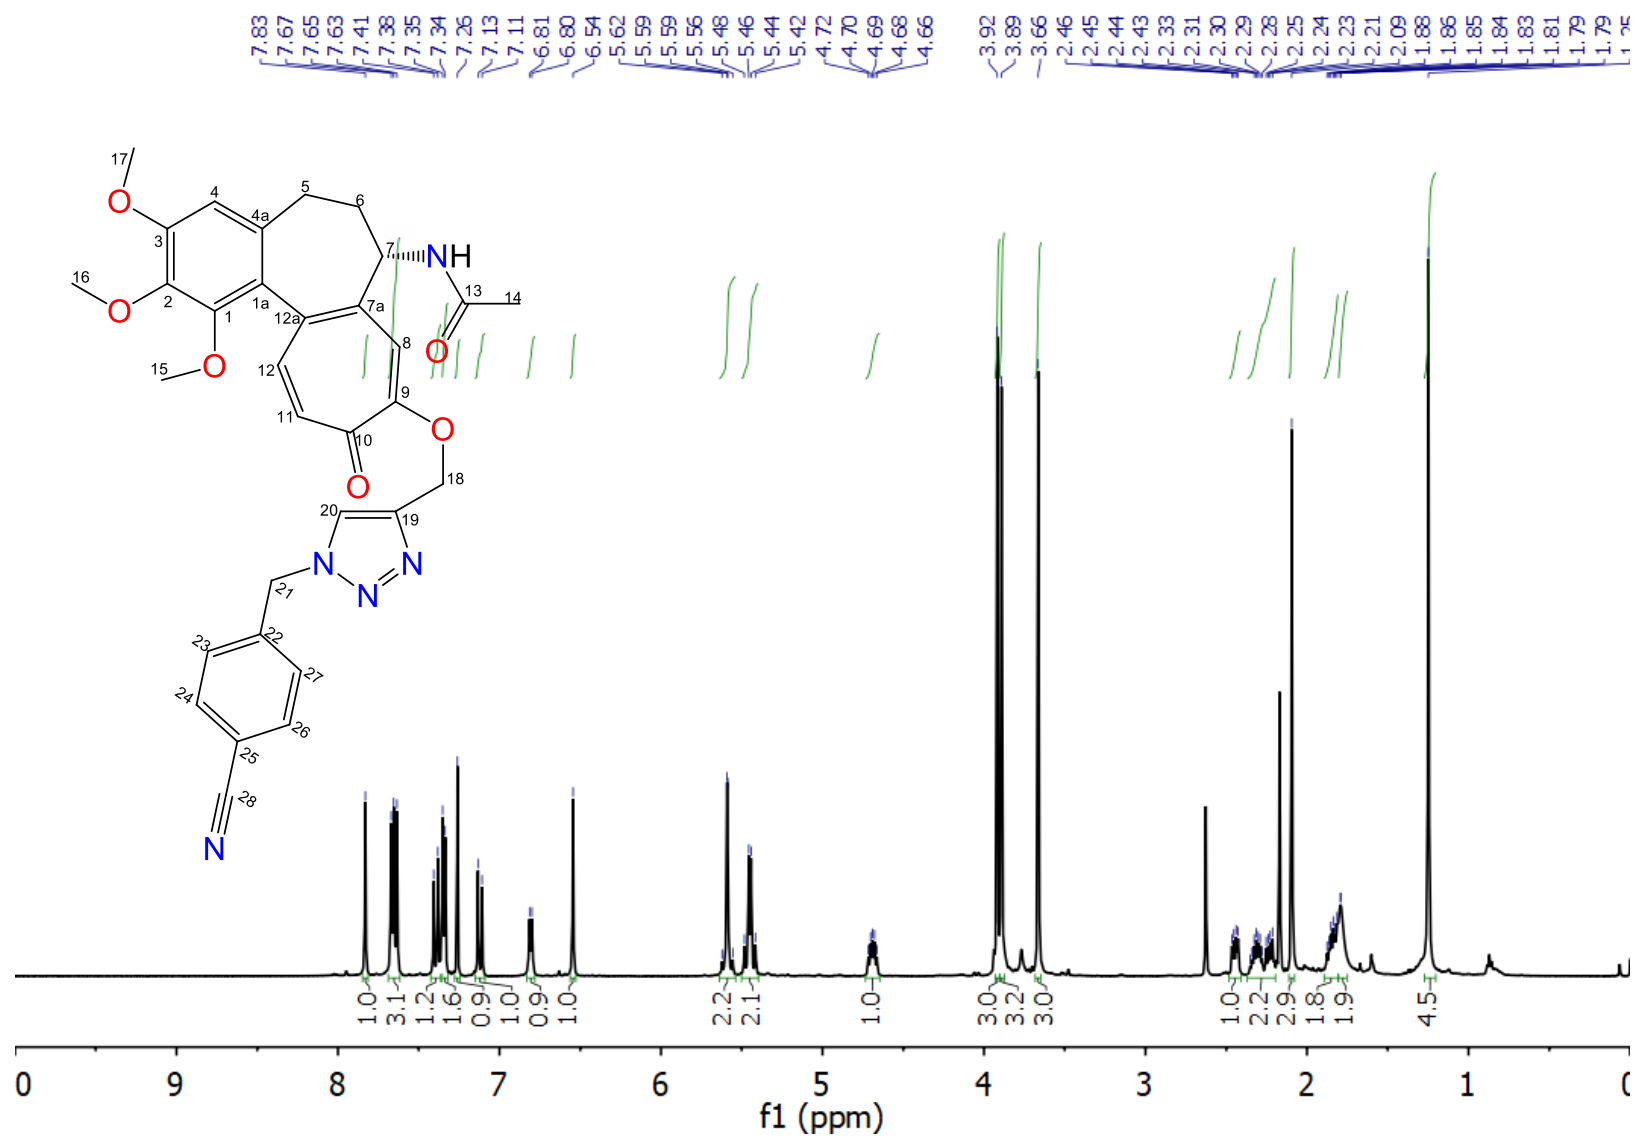

**Figure 92S.** <sup>1</sup>H NMR spectrum of compound **5b** in CDCl<sub>3</sub>.

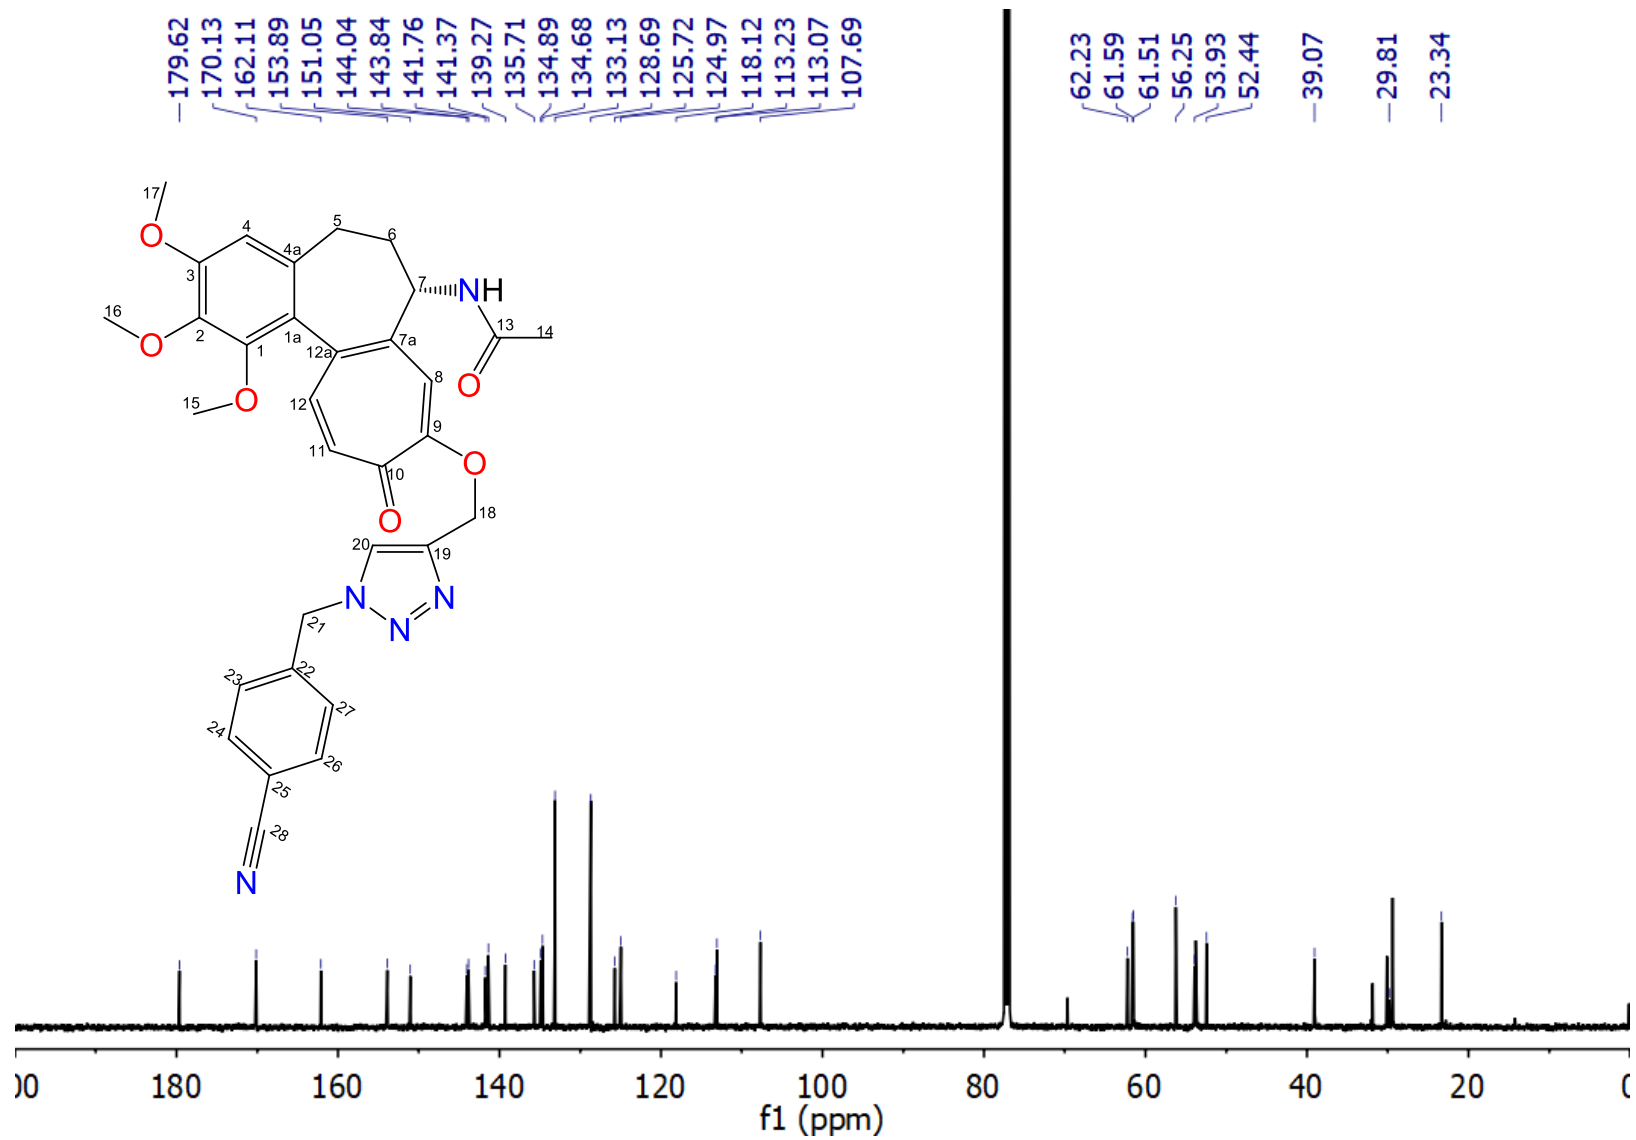

**Figure 93S.** <sup>13</sup>C NMR spectrum of compound **5b** in CDCl<sub>3</sub>.

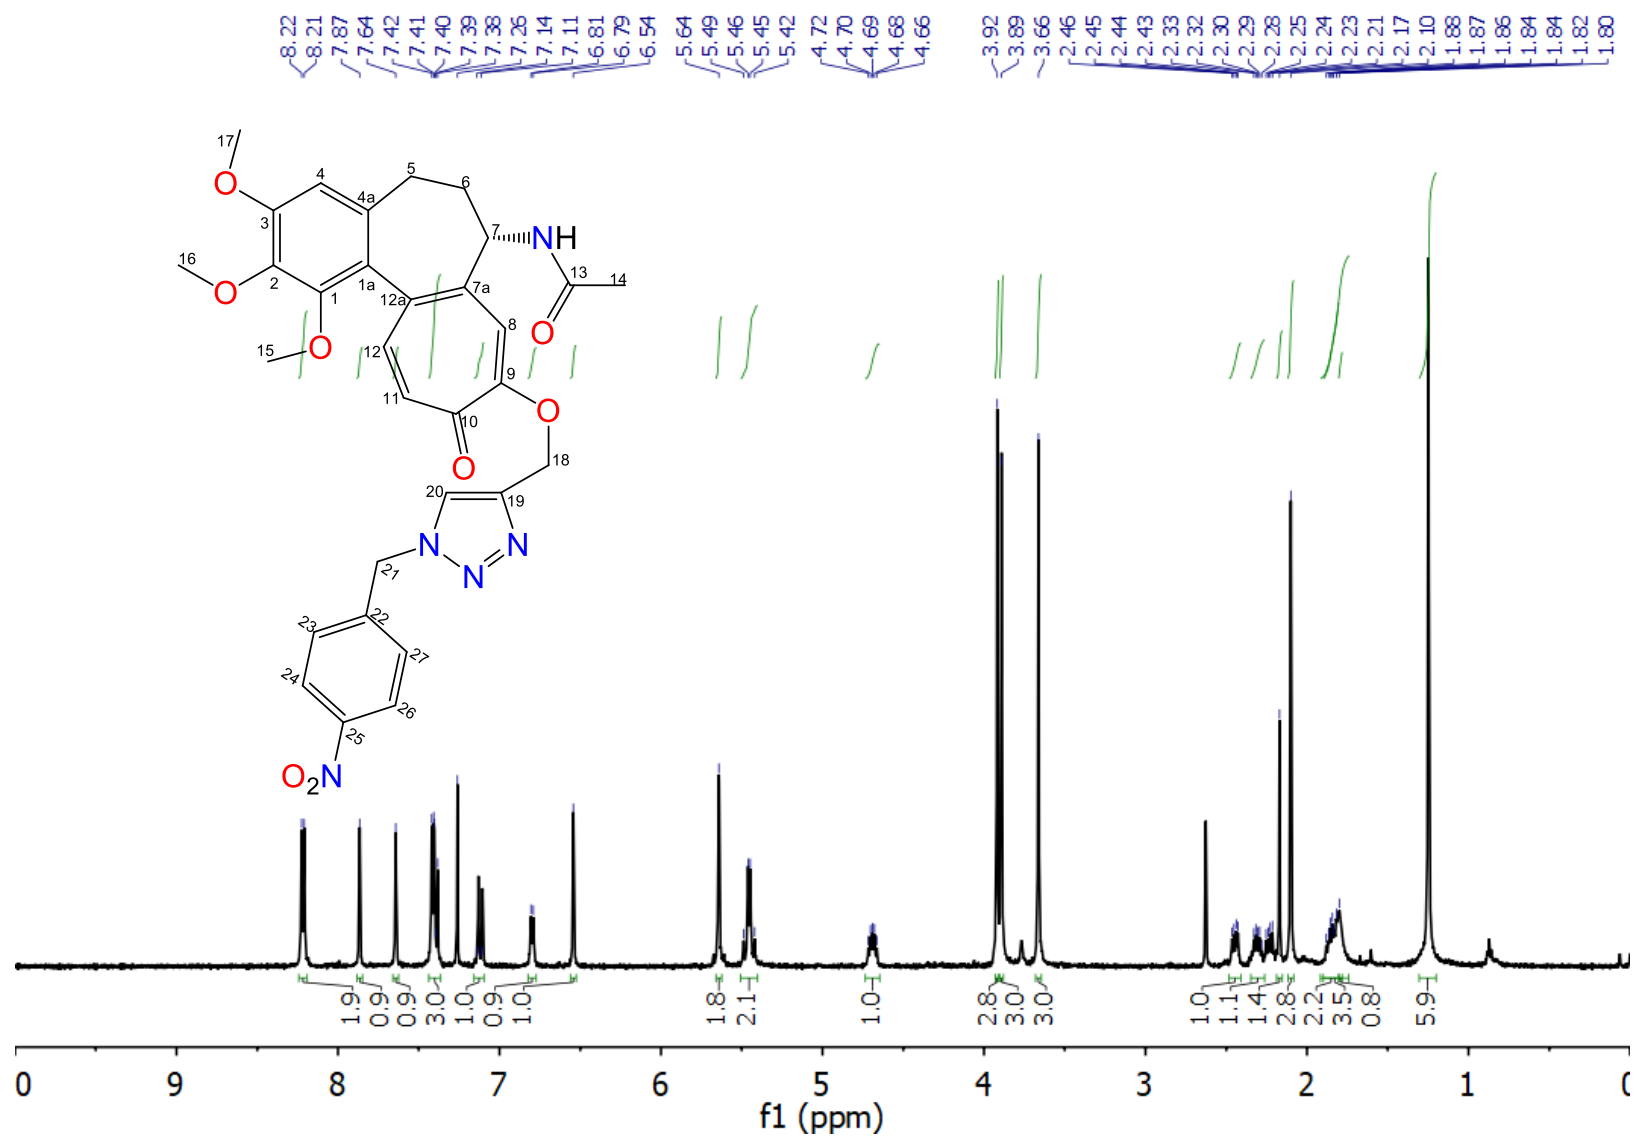

Figure 94S. <sup>1</sup>H NMR spectrum of compound 5c in CDCl<sub>3</sub>.

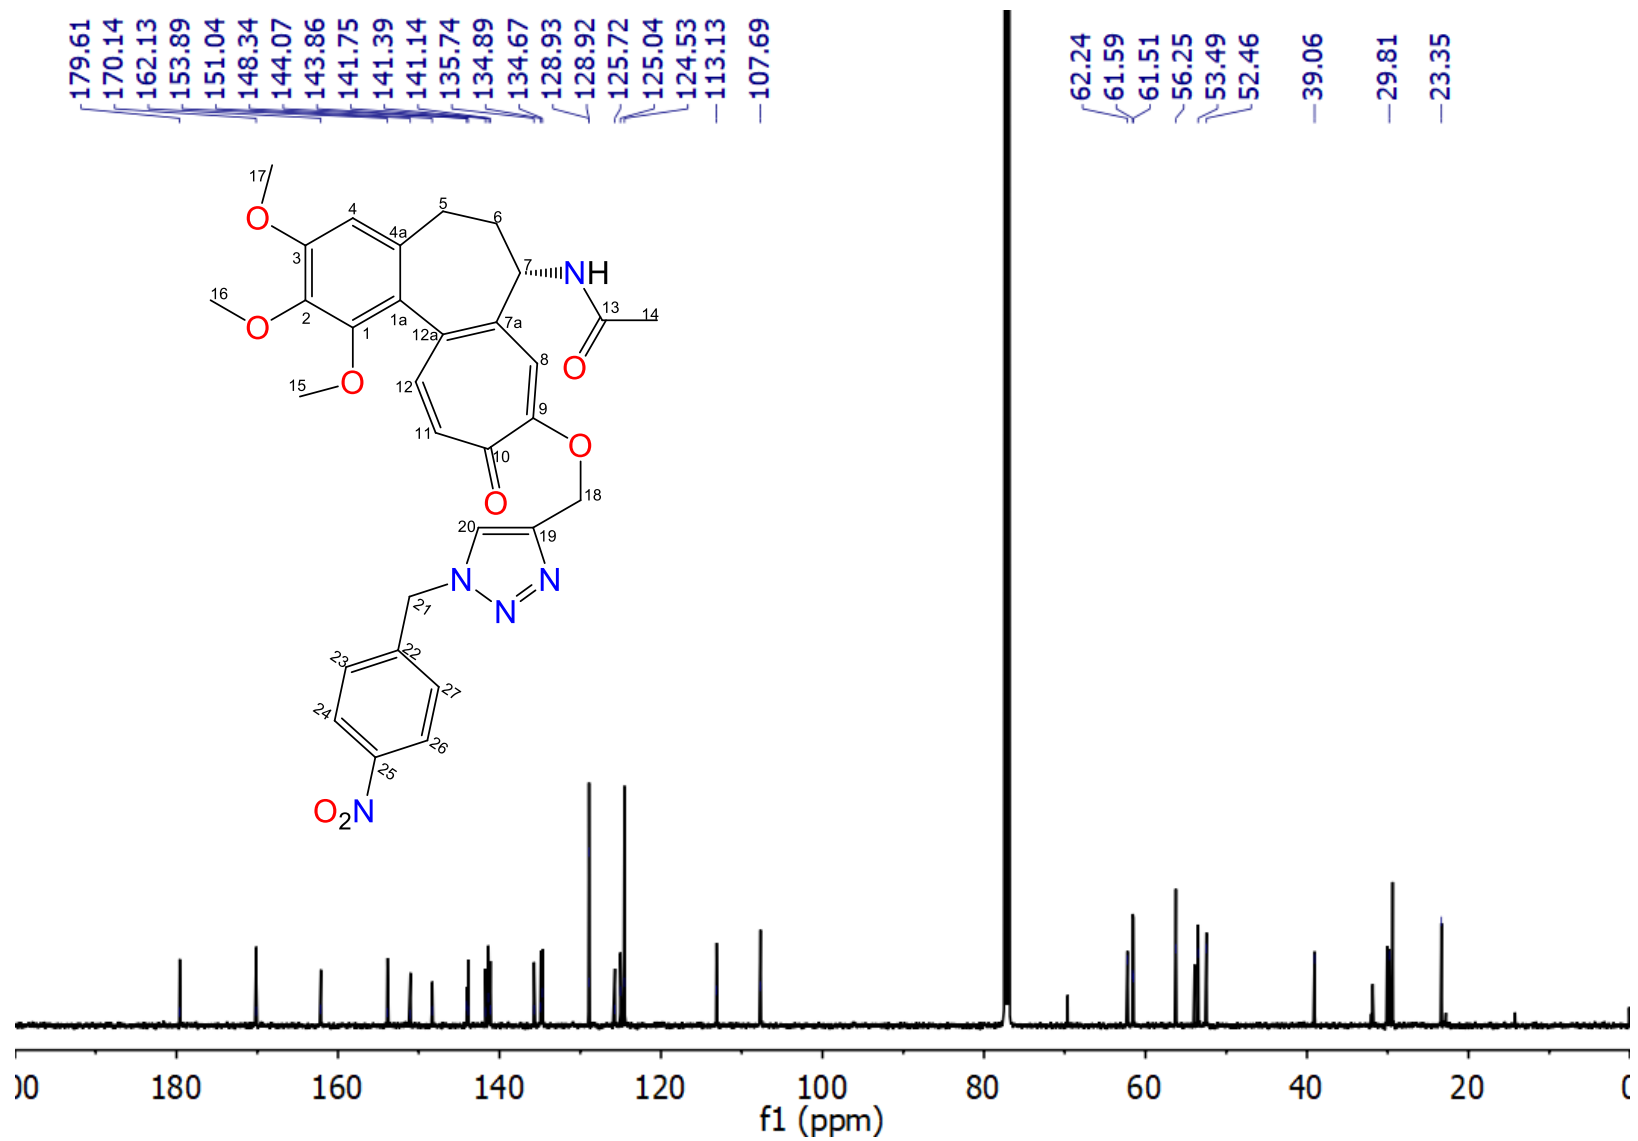

**Figure 95S.** <sup>13</sup>C NMR spectrum of compound **5c** in CDCl<sub>3</sub>.

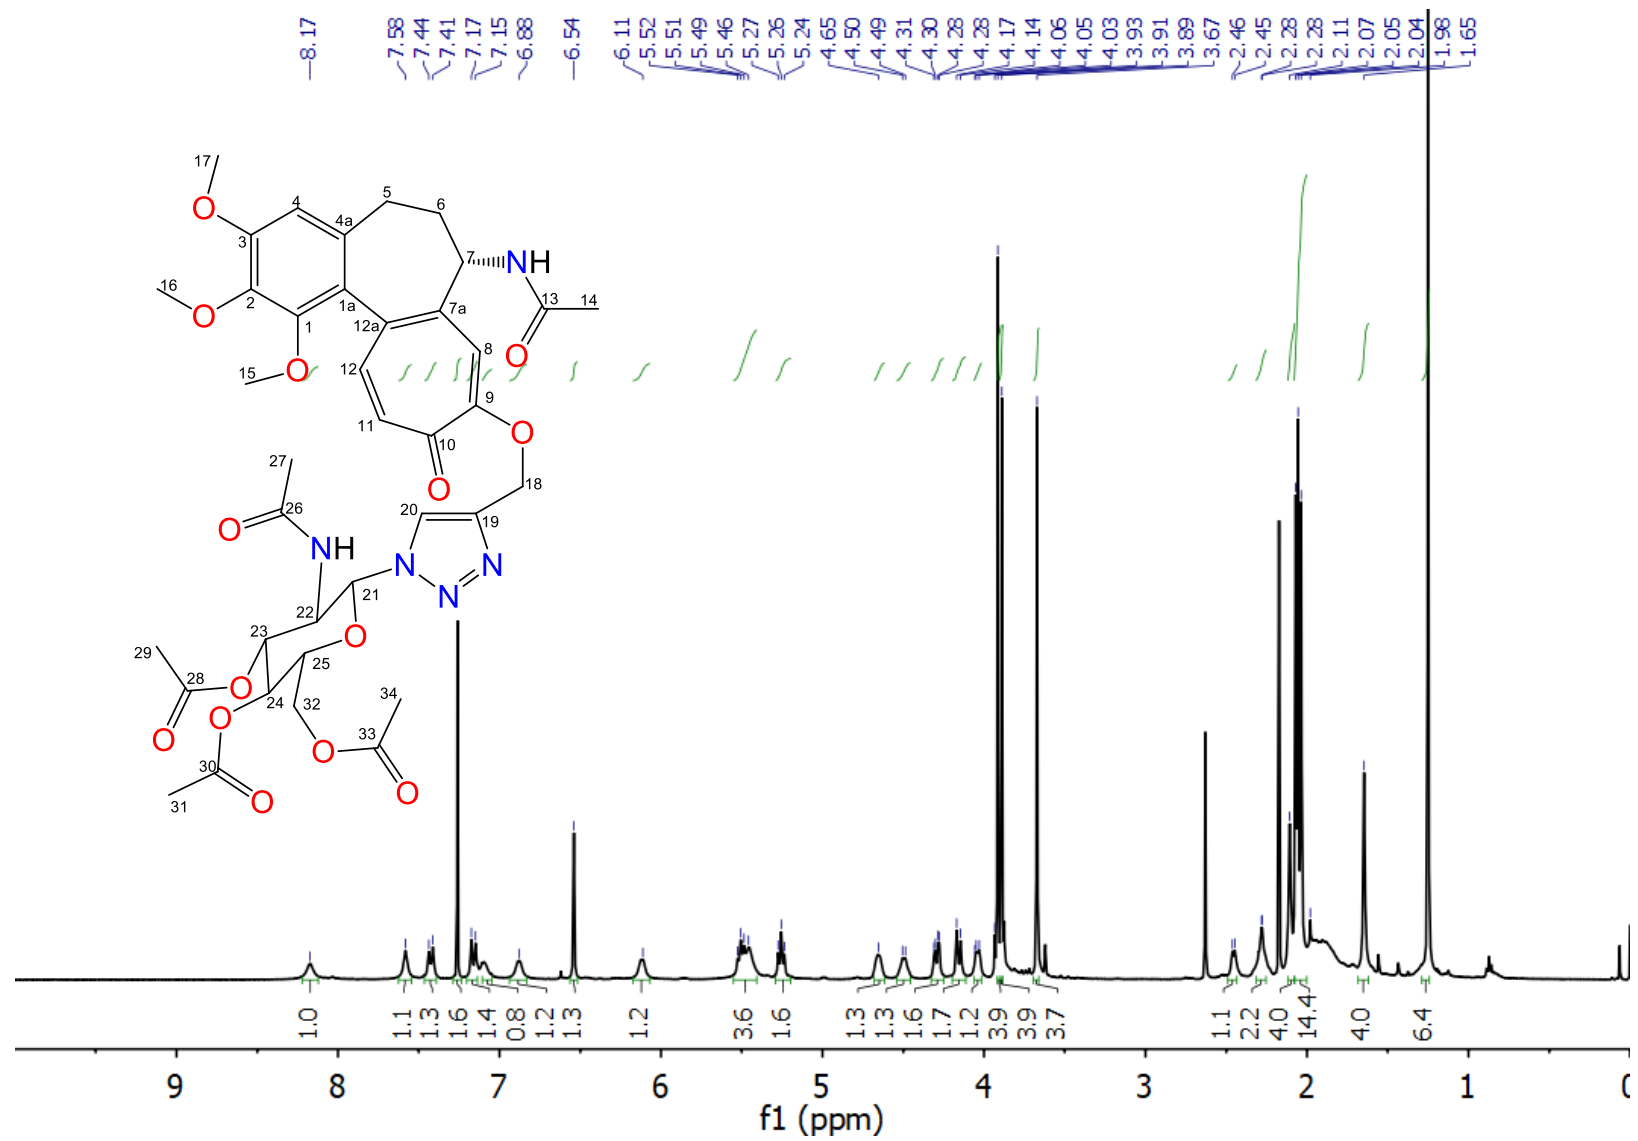

**Figure 96S.** <sup>1</sup>H NMR spectrum of compound **5d** in CDCl<sub>3</sub>.

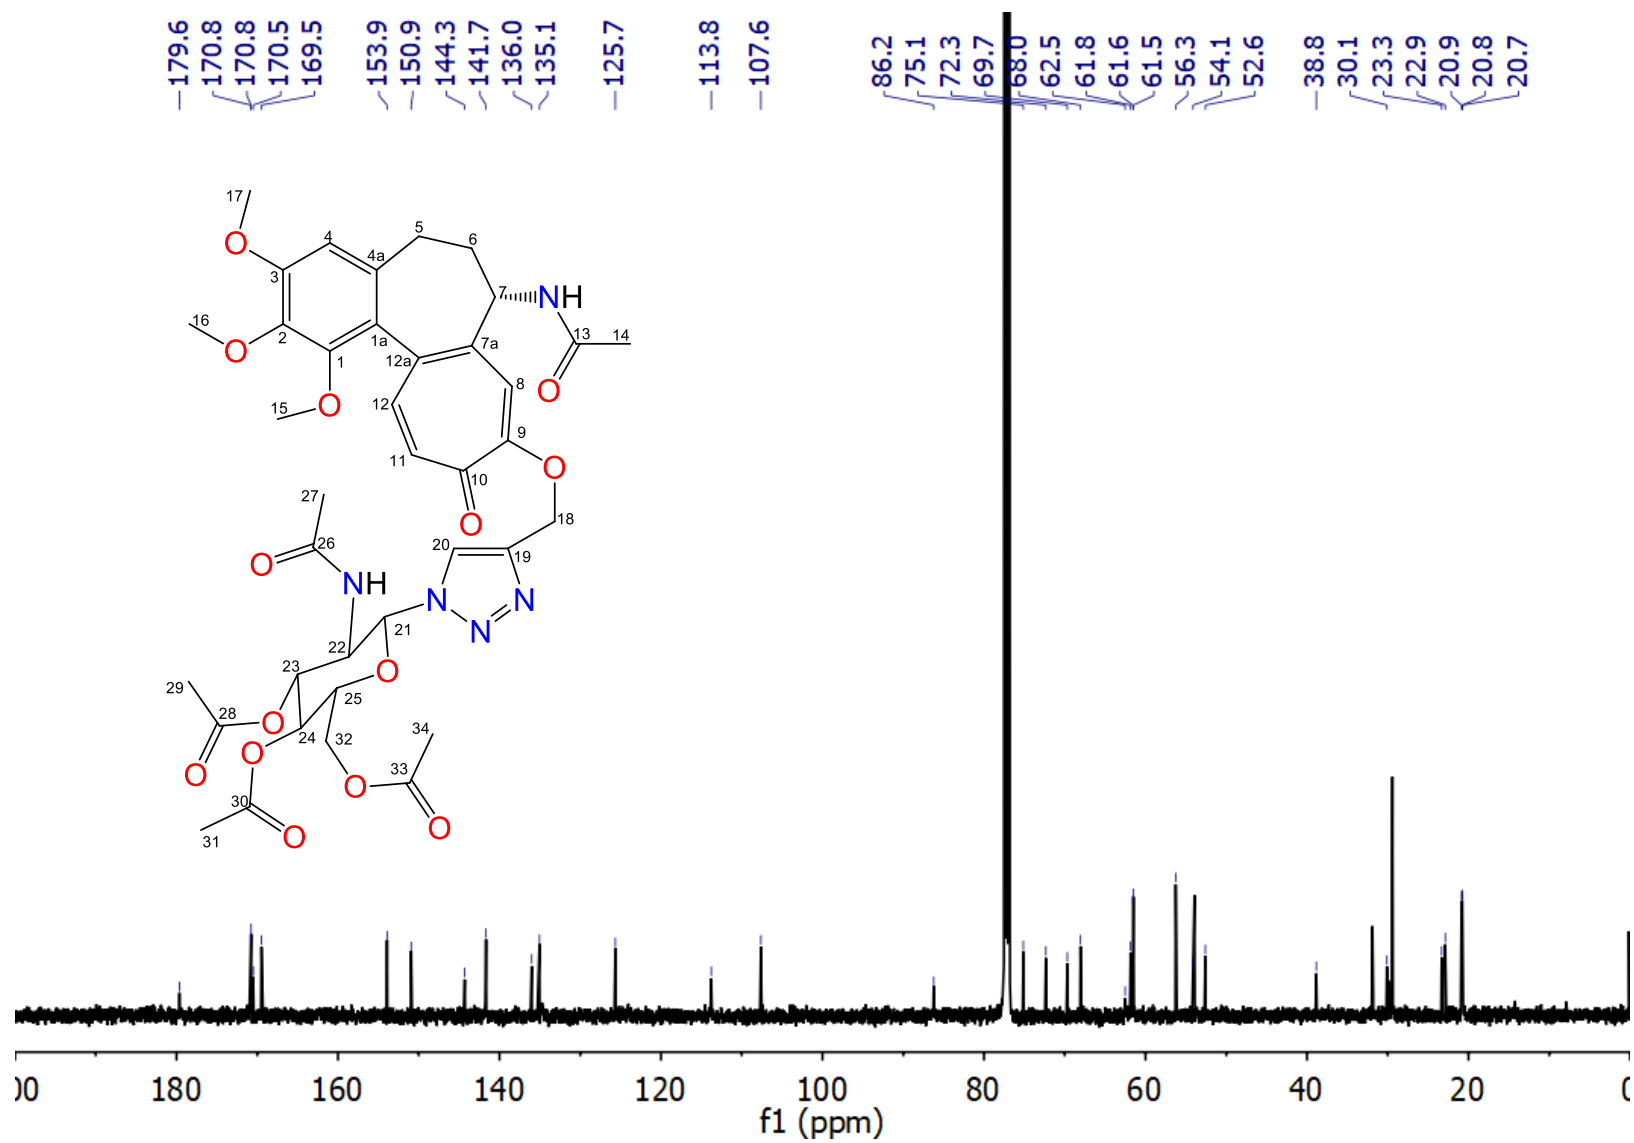

**Figure 97S.**  $^{13}\text{C}$  NMR spectrum of compound **5d** in  $\text{CDCl}_3$ .



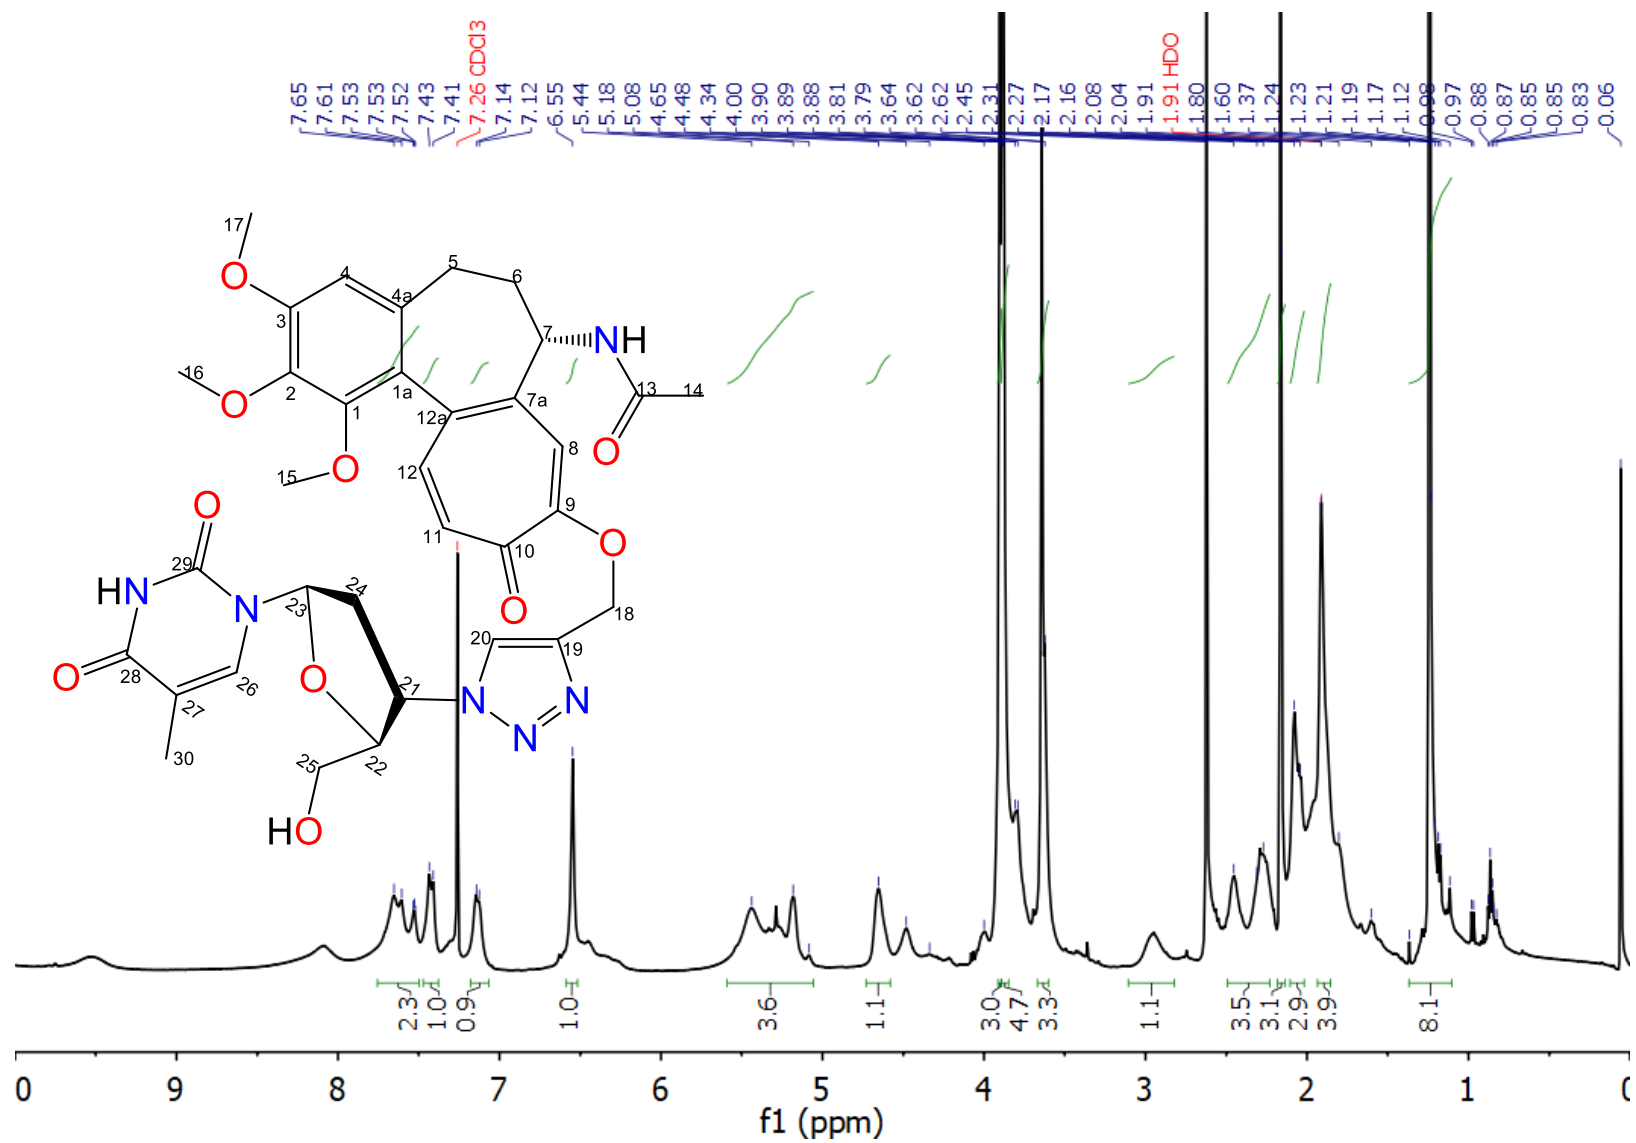

**Figure 98S.** <sup>1</sup>H NMR spectrum of compound **5e** in CDCl<sub>3</sub>.

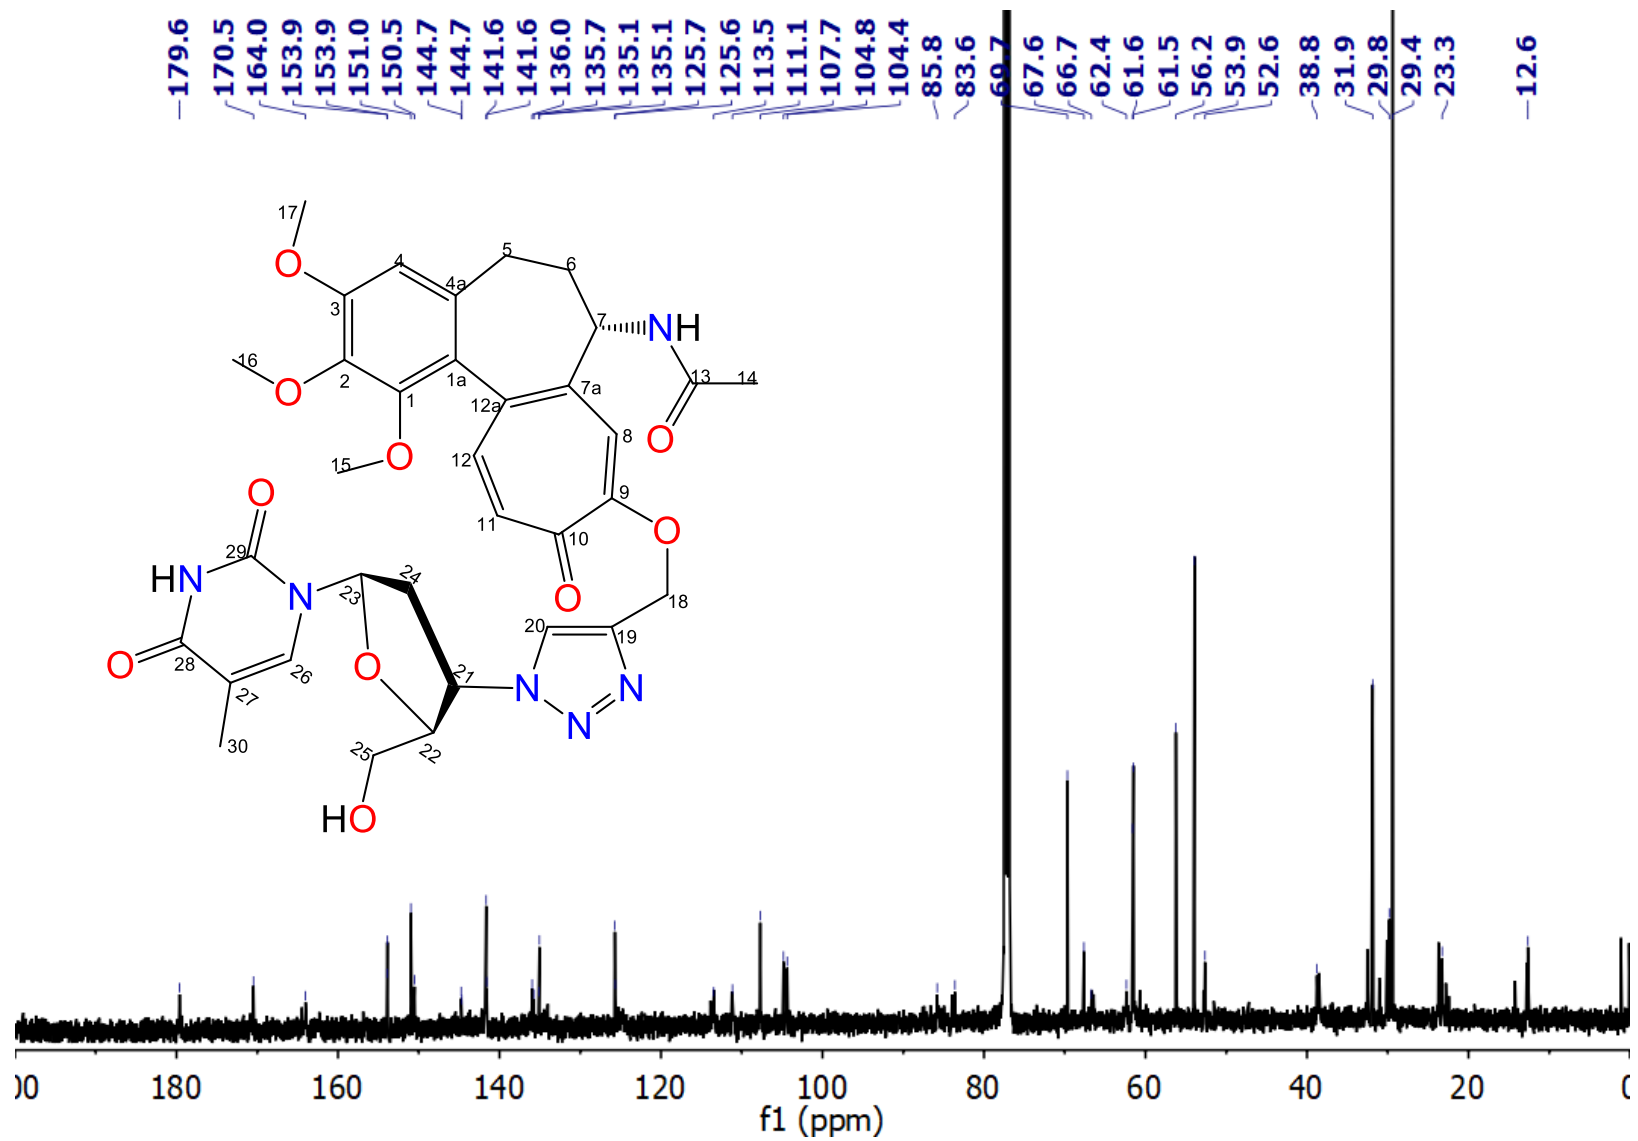

Figure 99S.  $^{13}\text{C}$  NMR spectrum of compound **5e** in  $\text{CDCl}_3$ .

ZQ80583 1 (0.101)

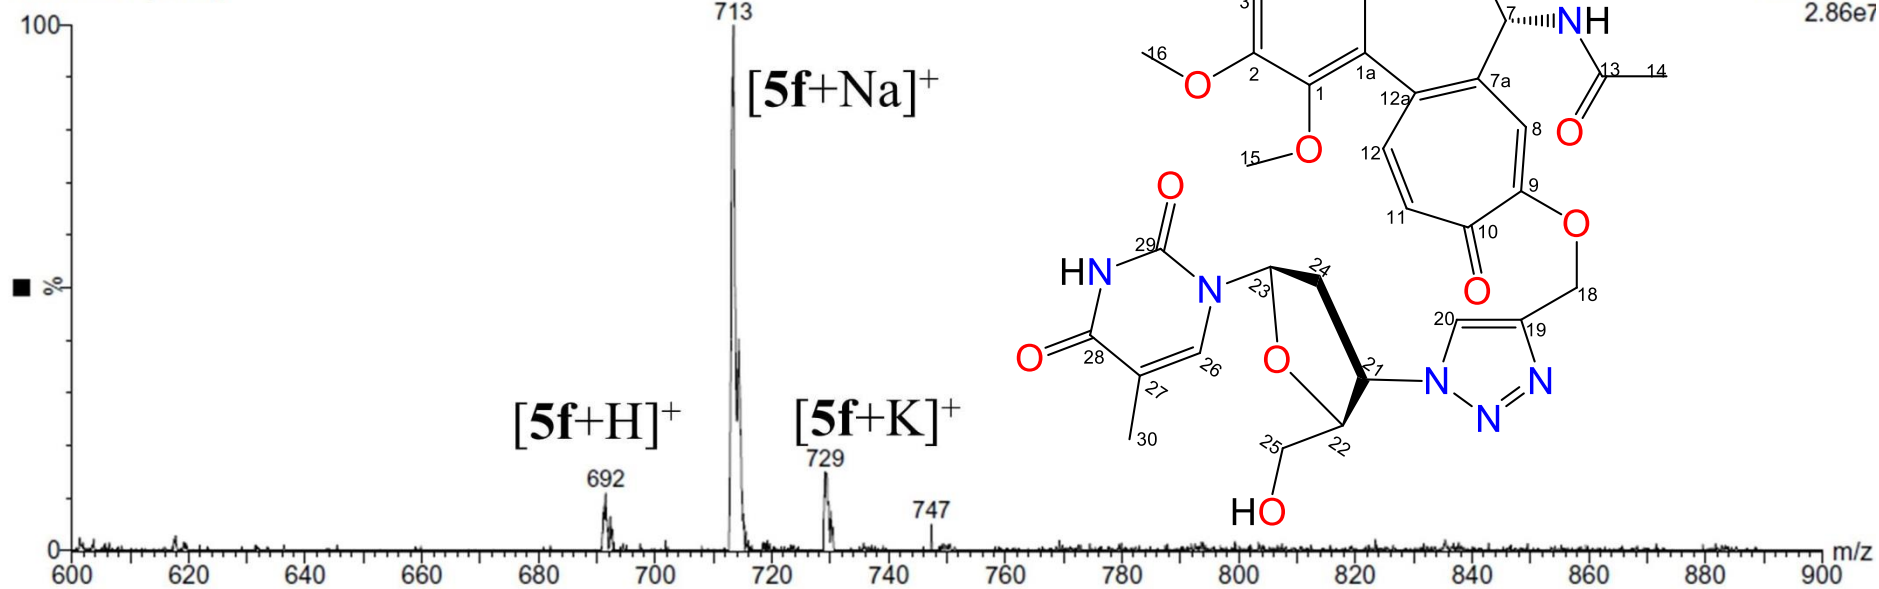

Figure 100S. ESI MS<sup>+</sup> spectrum of **5e**.

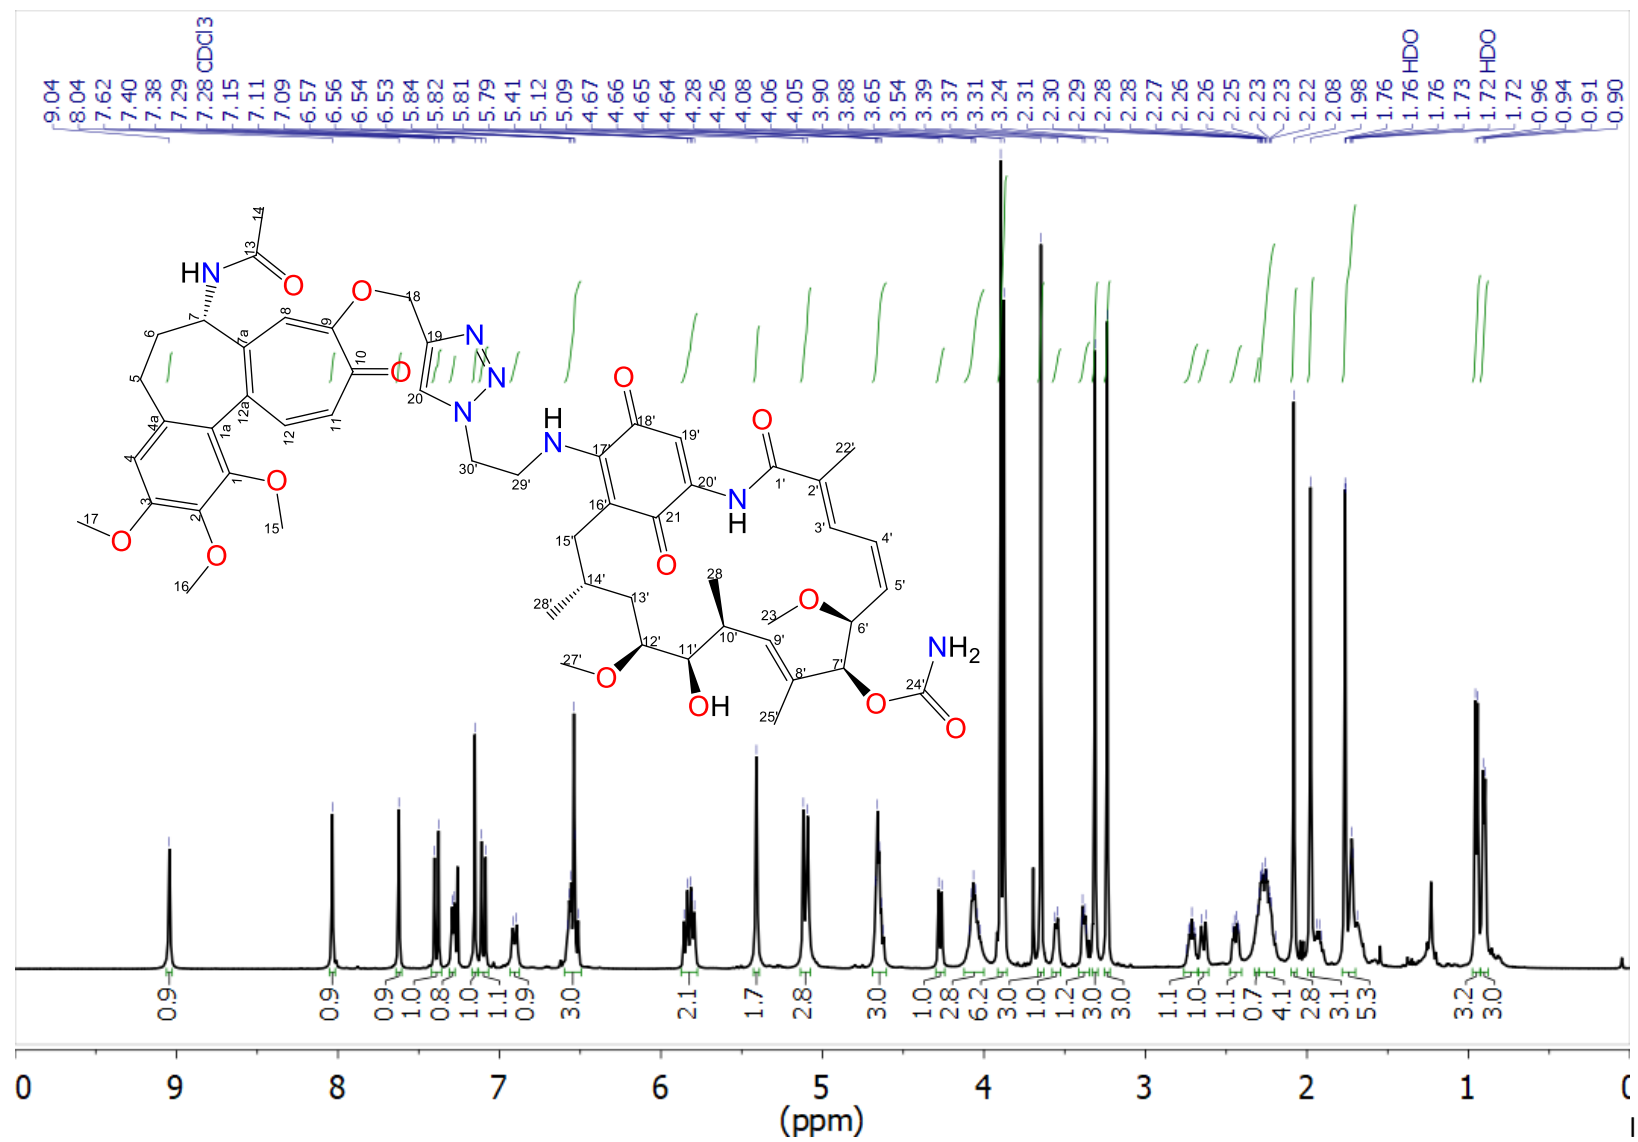

**Figure 101S.**  $^1\text{H}$  NMR spectrum of compound **5f** in  $\text{CDCl}_3$ .

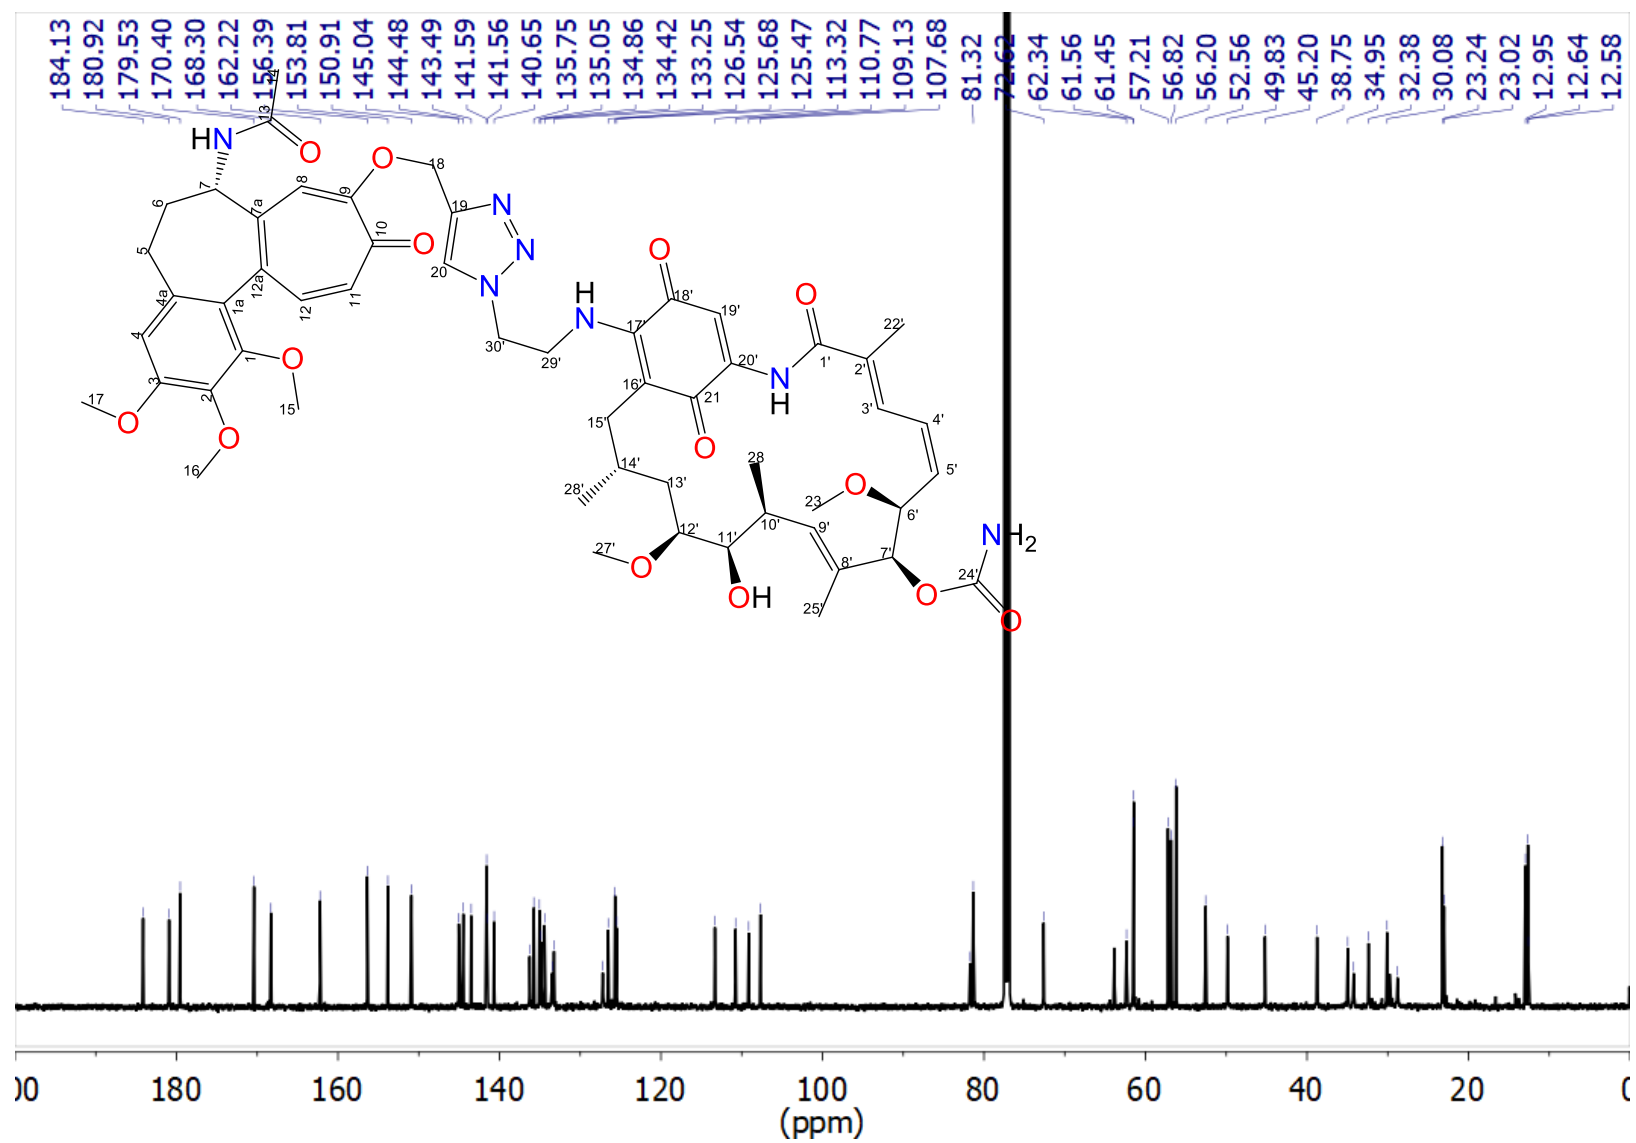

**Figure 102S.**  $^{13}\text{C}$  NMR spectrum of compound **5f** in  $\text{CDCl}_3$ .

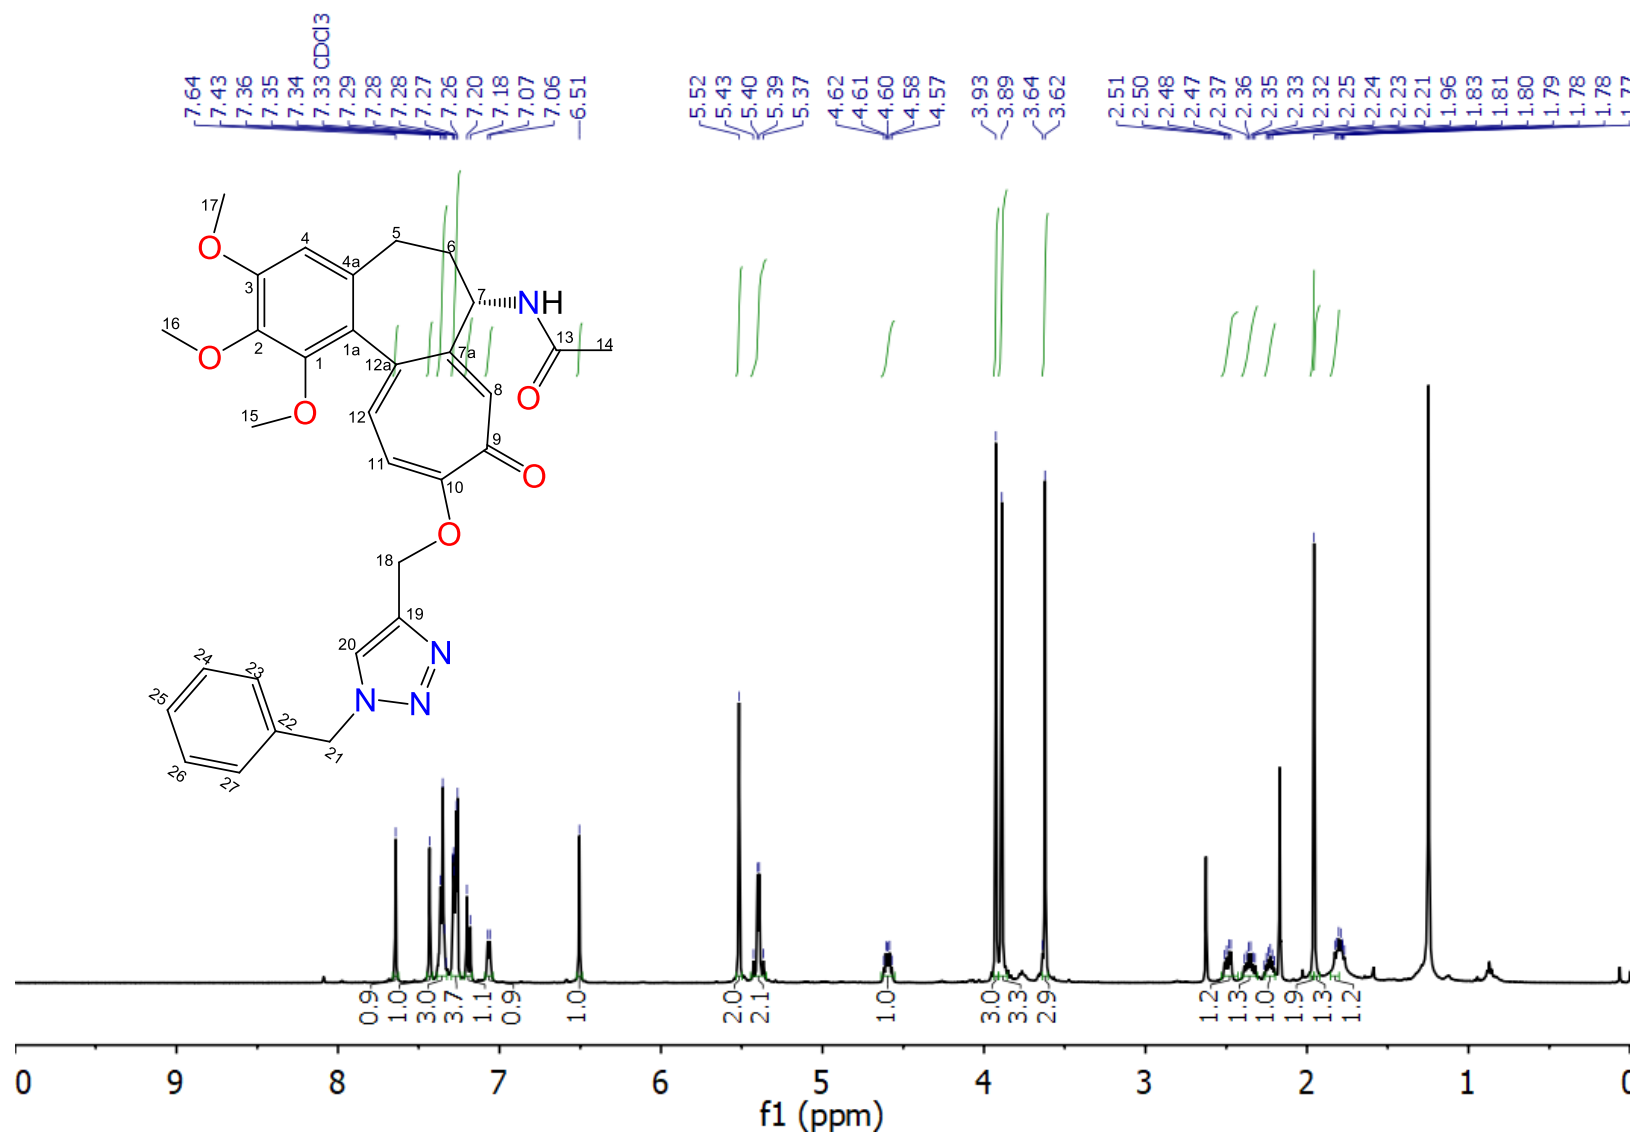

Figure 103S. <sup>1</sup>H NMR spectrum of compound **6a** in CDCl<sub>3</sub>.

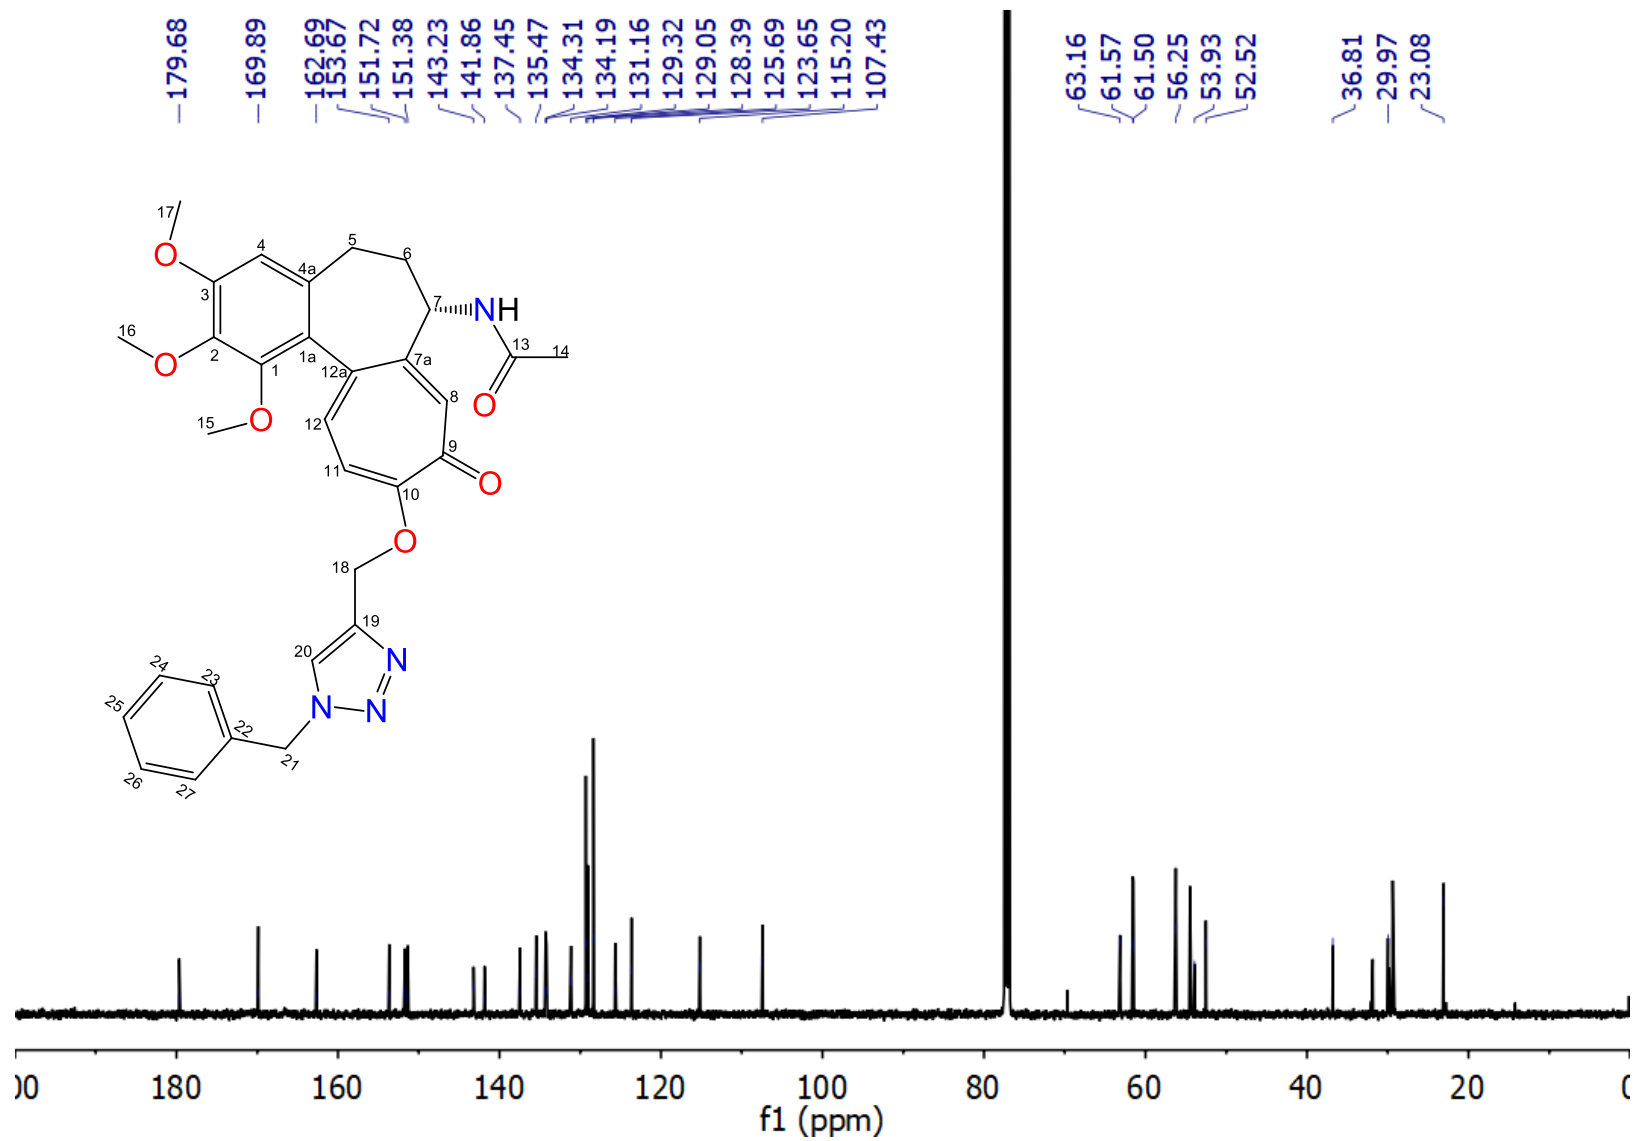

**Figure 104S.** <sup>13</sup>C NMR spectrum of compound **6a** in CDCl<sub>3</sub>.

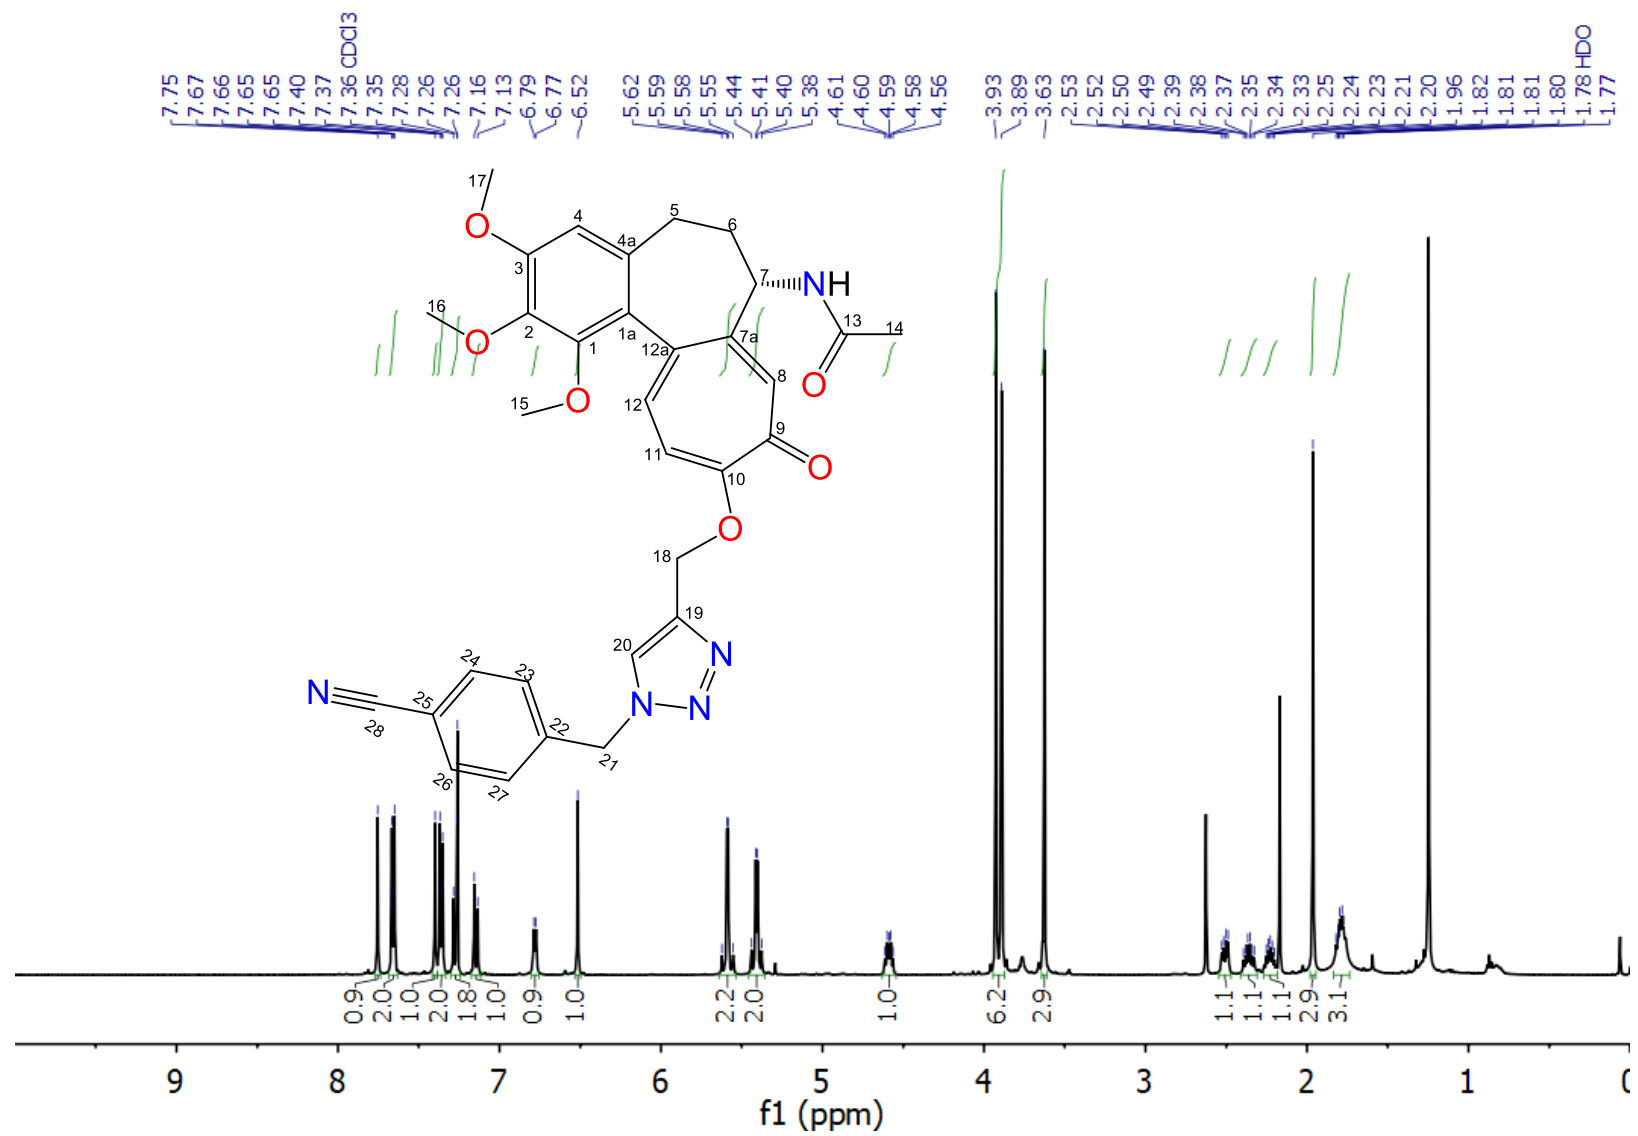

Figure 105S.  $^1\text{H}$  NMR spectrum of compound **6b** in  $\text{CDCl}_3$ .



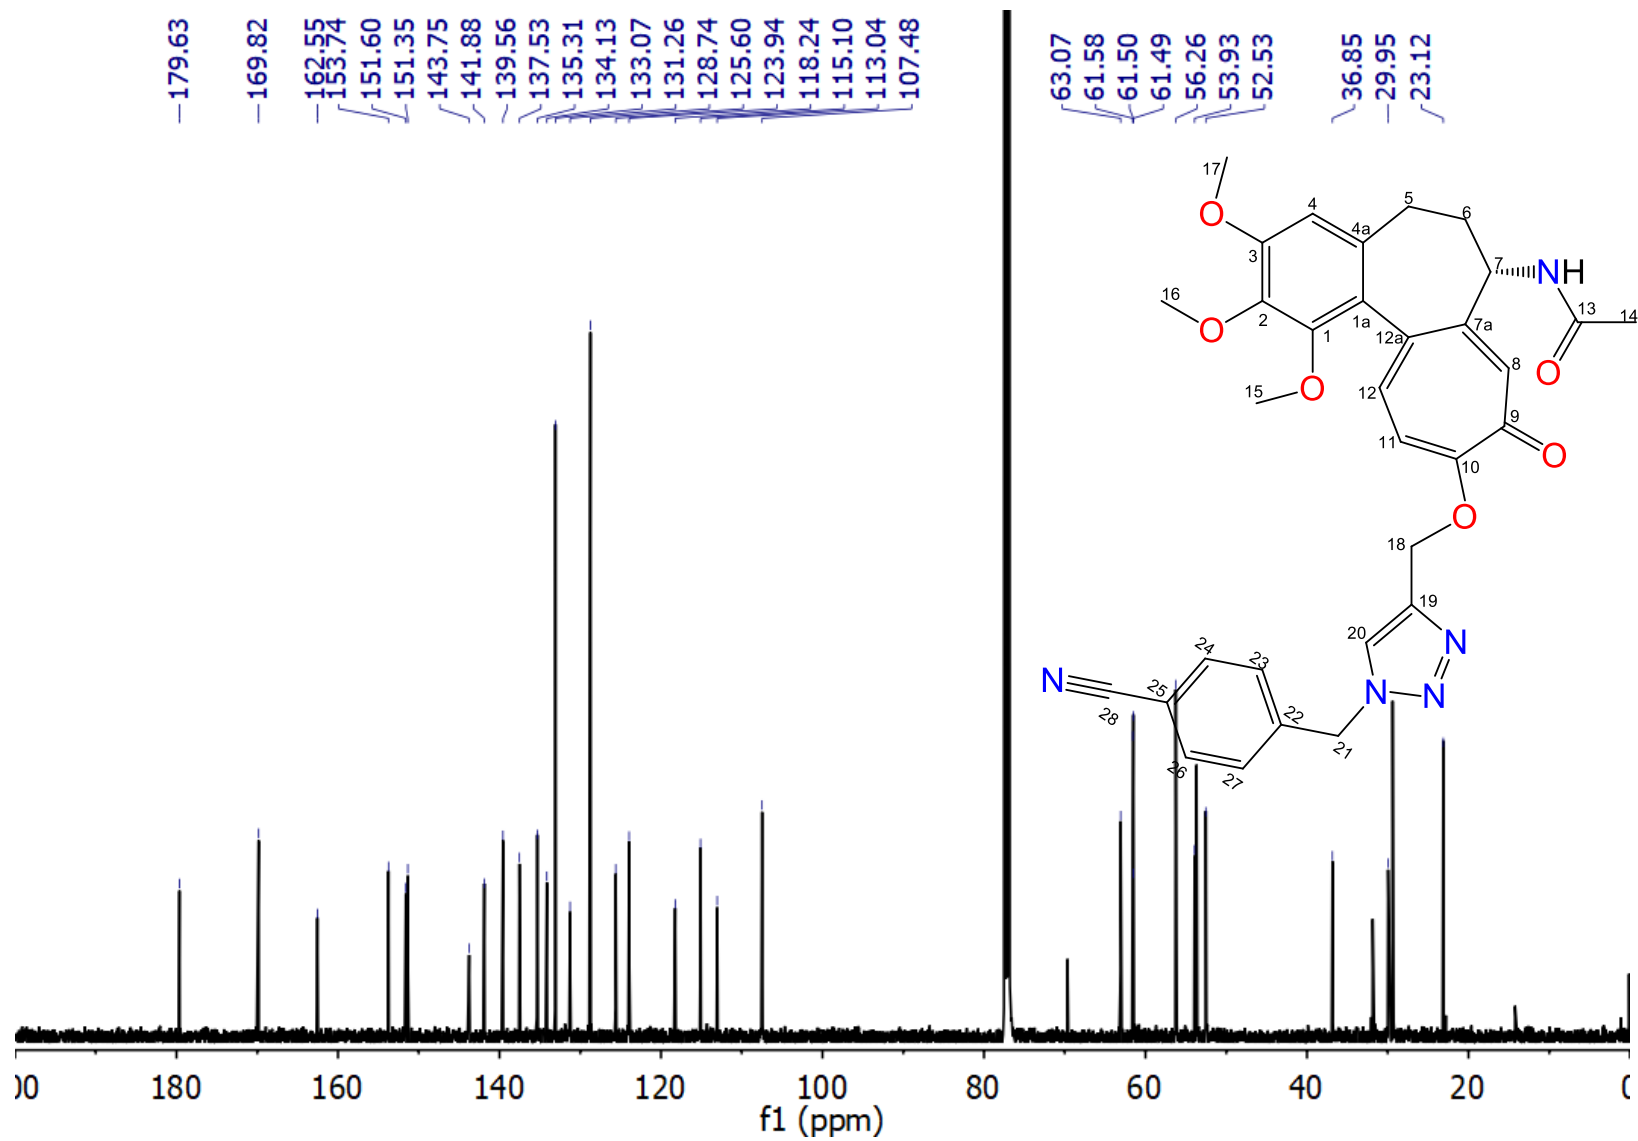

Figure 106S.  $^{13}\text{C}$  NMR spectrum of compound **6b** in  $\text{CDCl}_3$ .

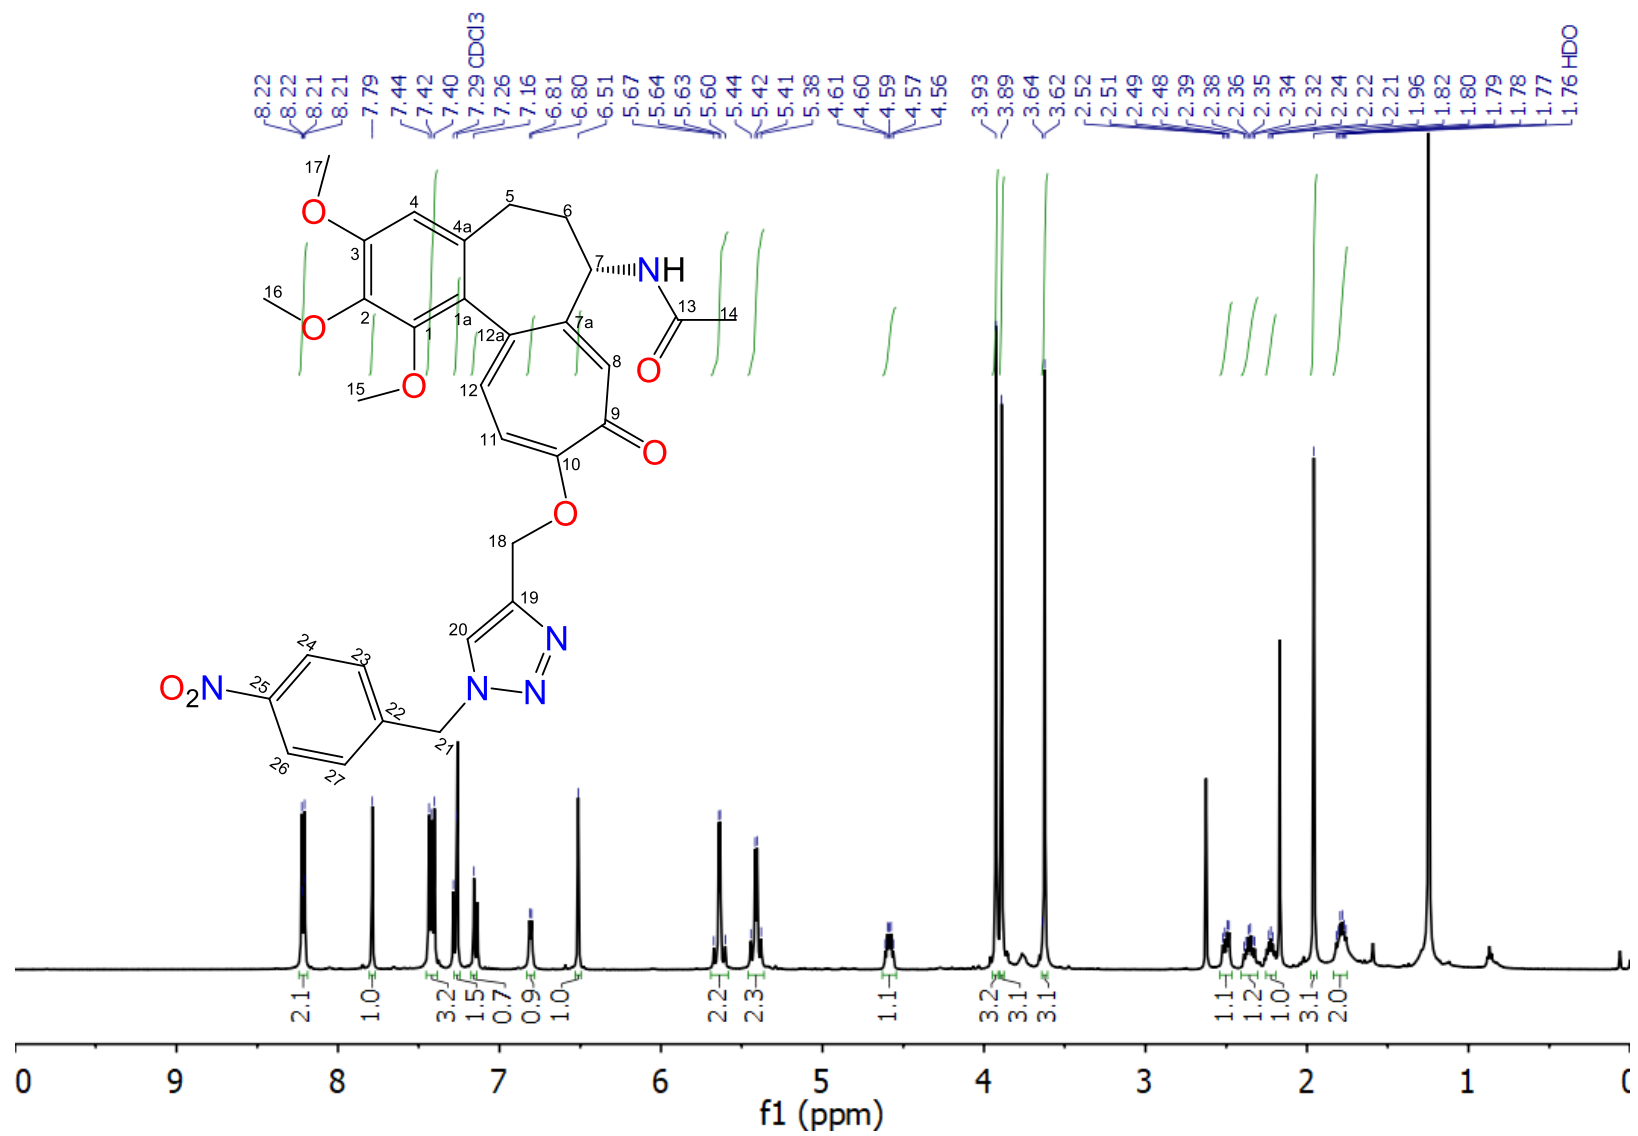

**Figure 107S.** <sup>1</sup>H NMR spectrum of compound **6c** in CDCl<sub>3</sub>.

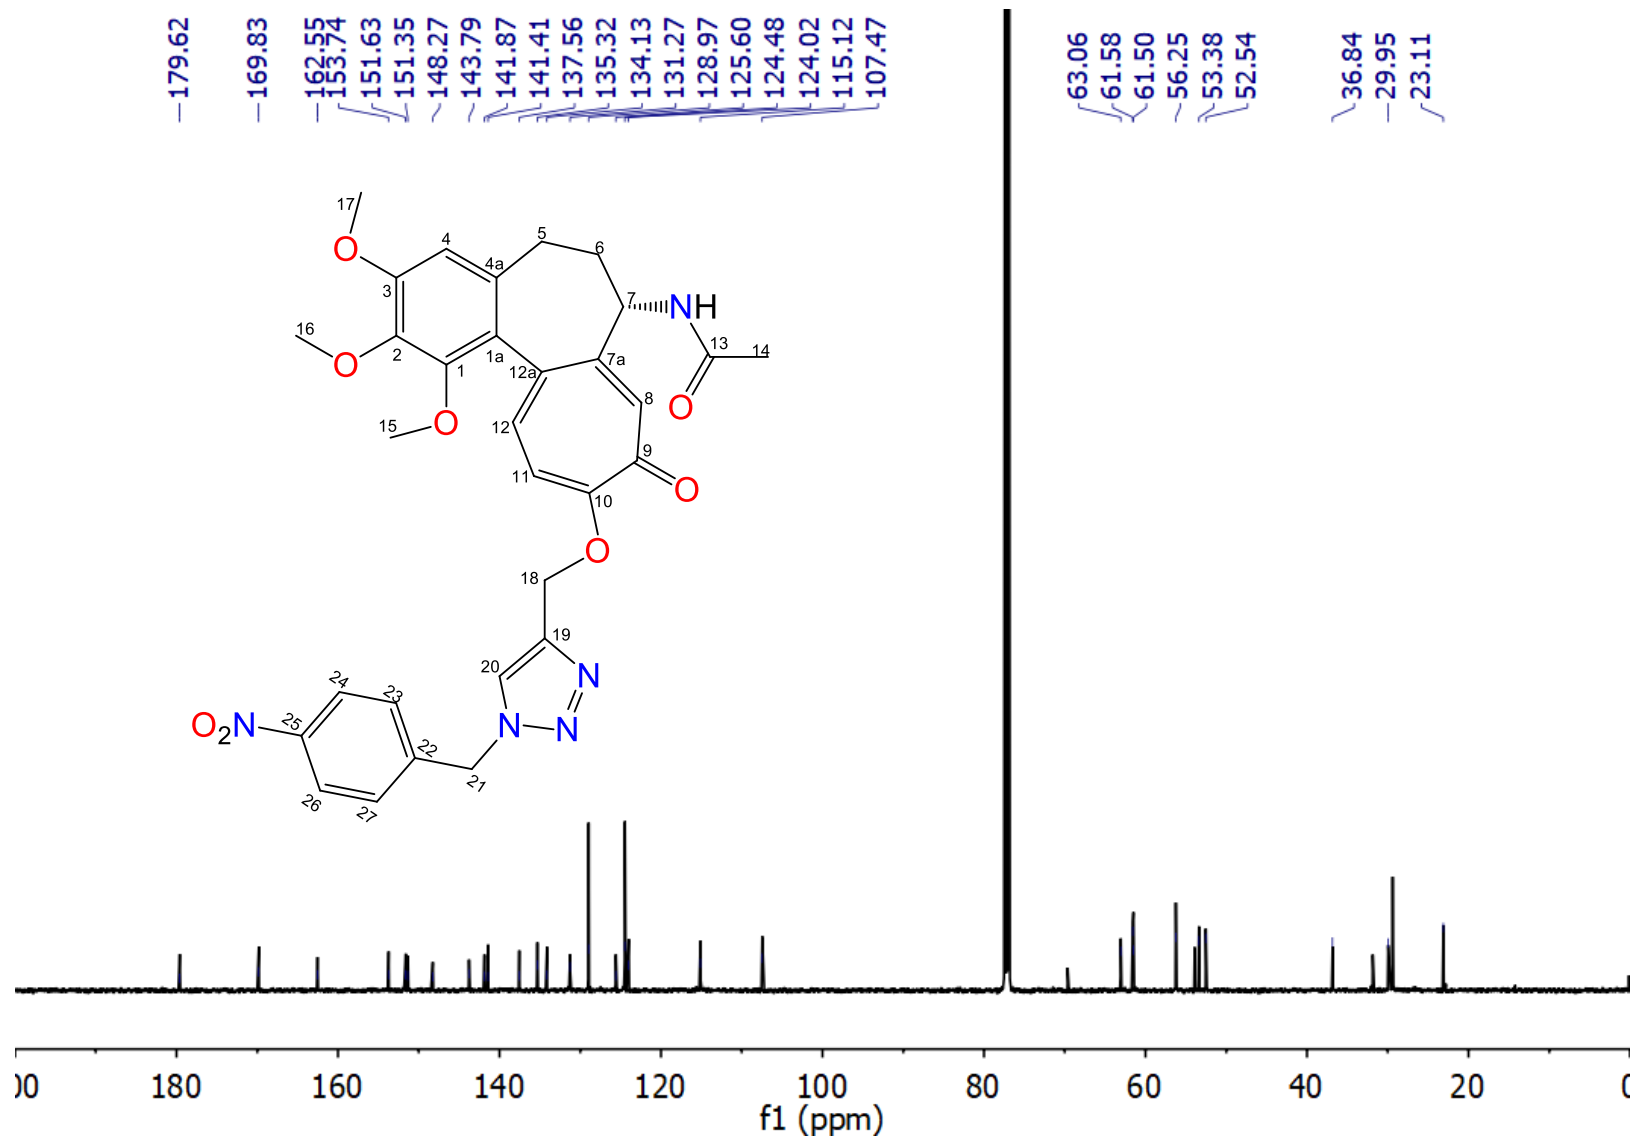

**Figure 108S.**  $^{13}\text{C}$  NMR spectrum of compound **6c** in  $\text{CDCl}_3$ .

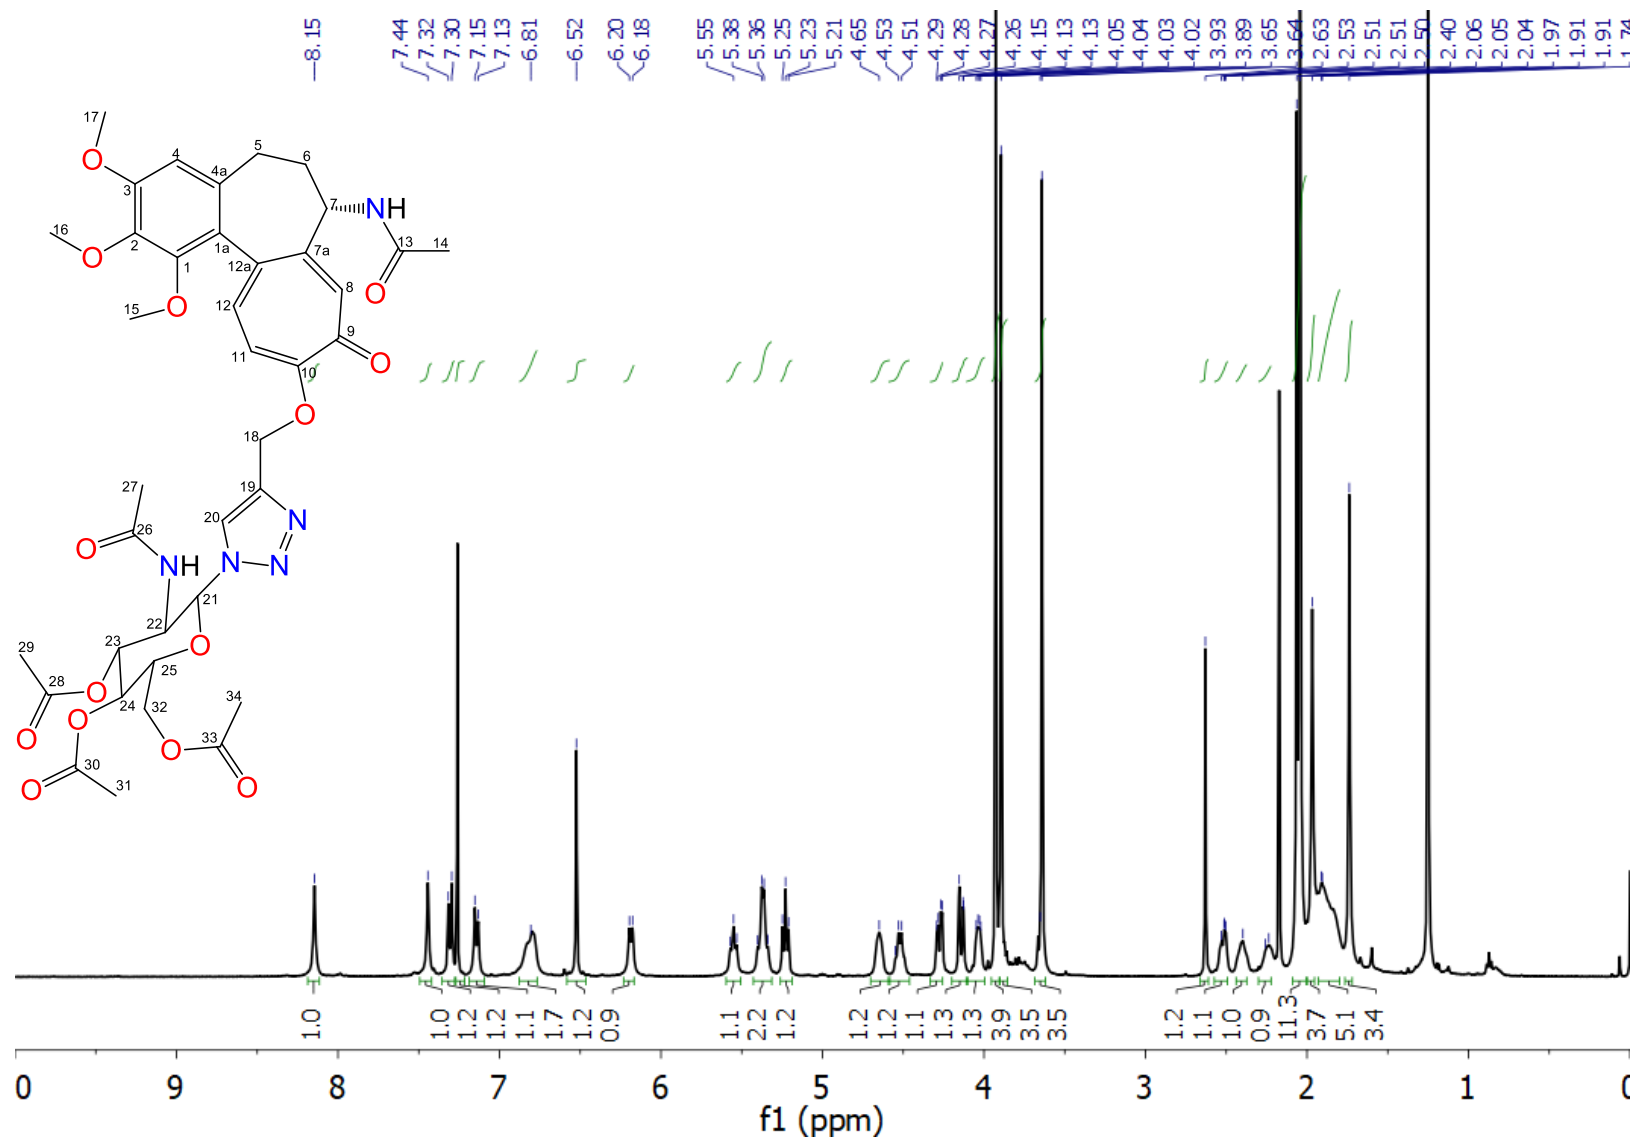

**Figure 109S.** <sup>1</sup>H NMR spectrum of compound **6d** in CDCl<sub>3</sub>.

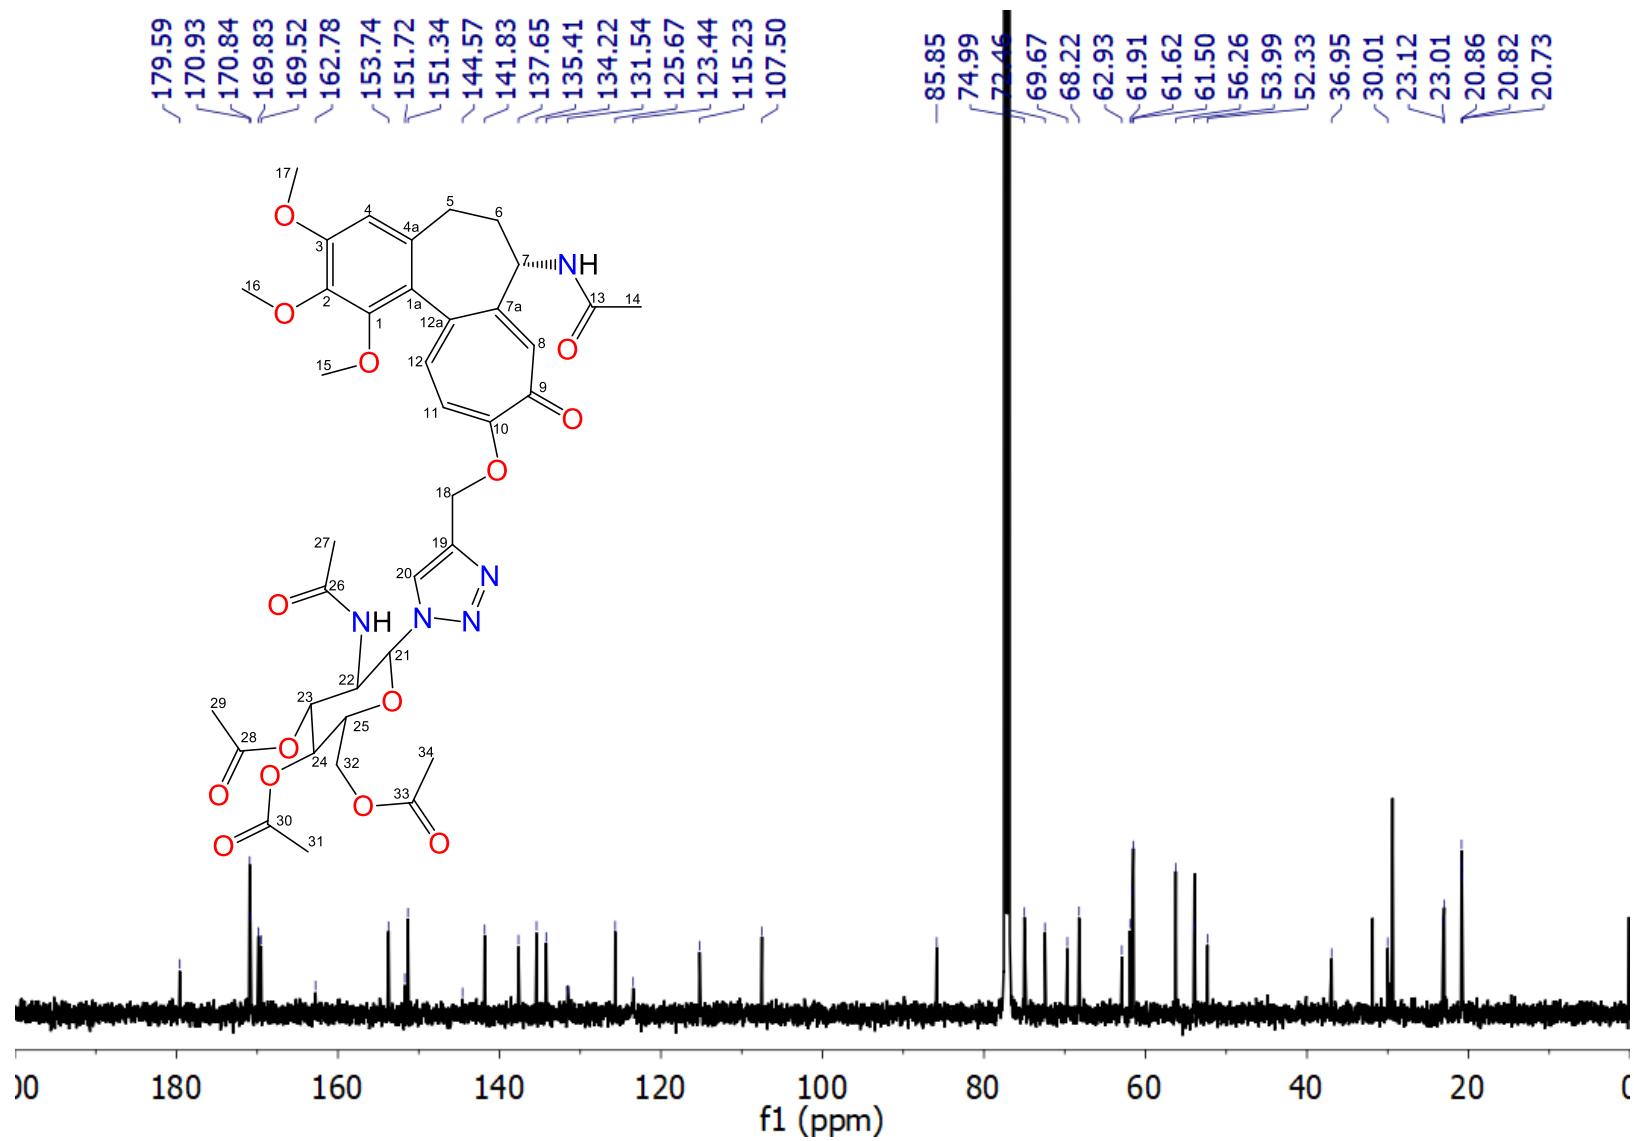

**Figure 110S.**  $^{13}\text{C}$  NMR spectrum of compound **6d** in  $\text{CDCl}_3$ .

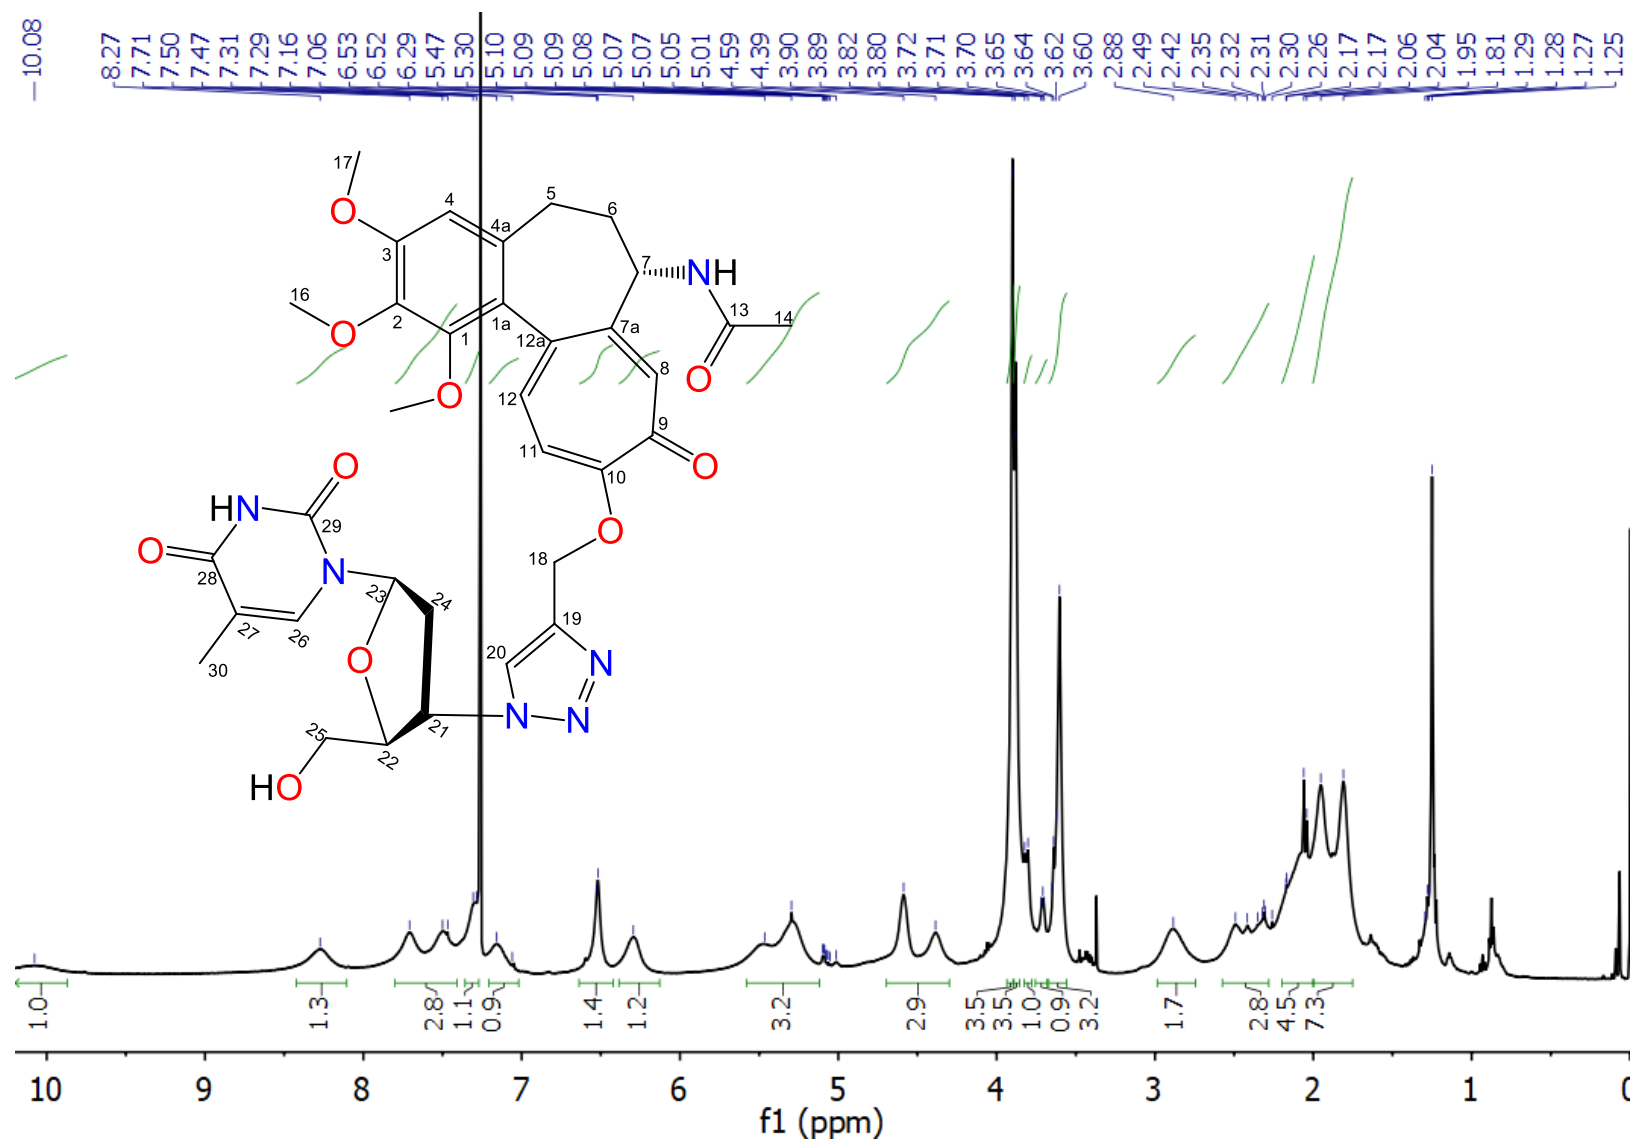

**Figure 111S.** <sup>1</sup>H NMR spectrum of compound **6e** in CDCl<sub>3</sub>.

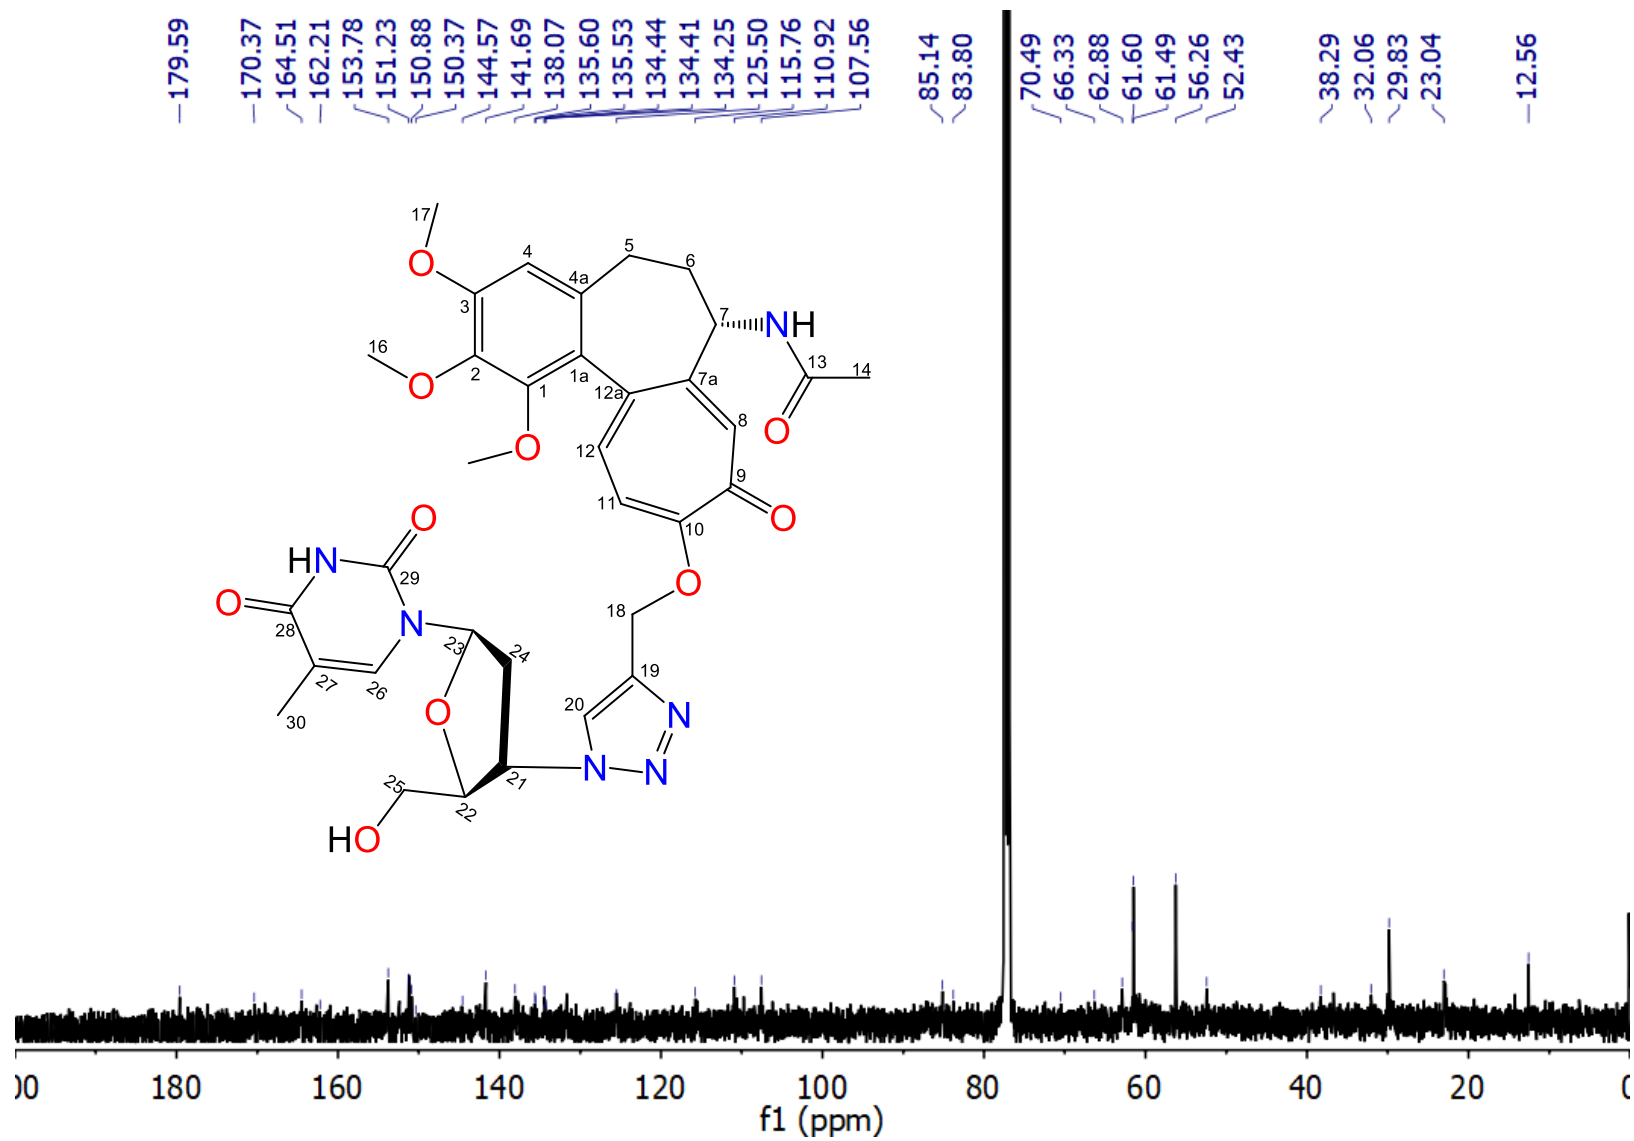

Figure 112S.  $^{13}\text{C}$  NMR spectrum of compound **6e** in  $\text{CDCl}_3$ .

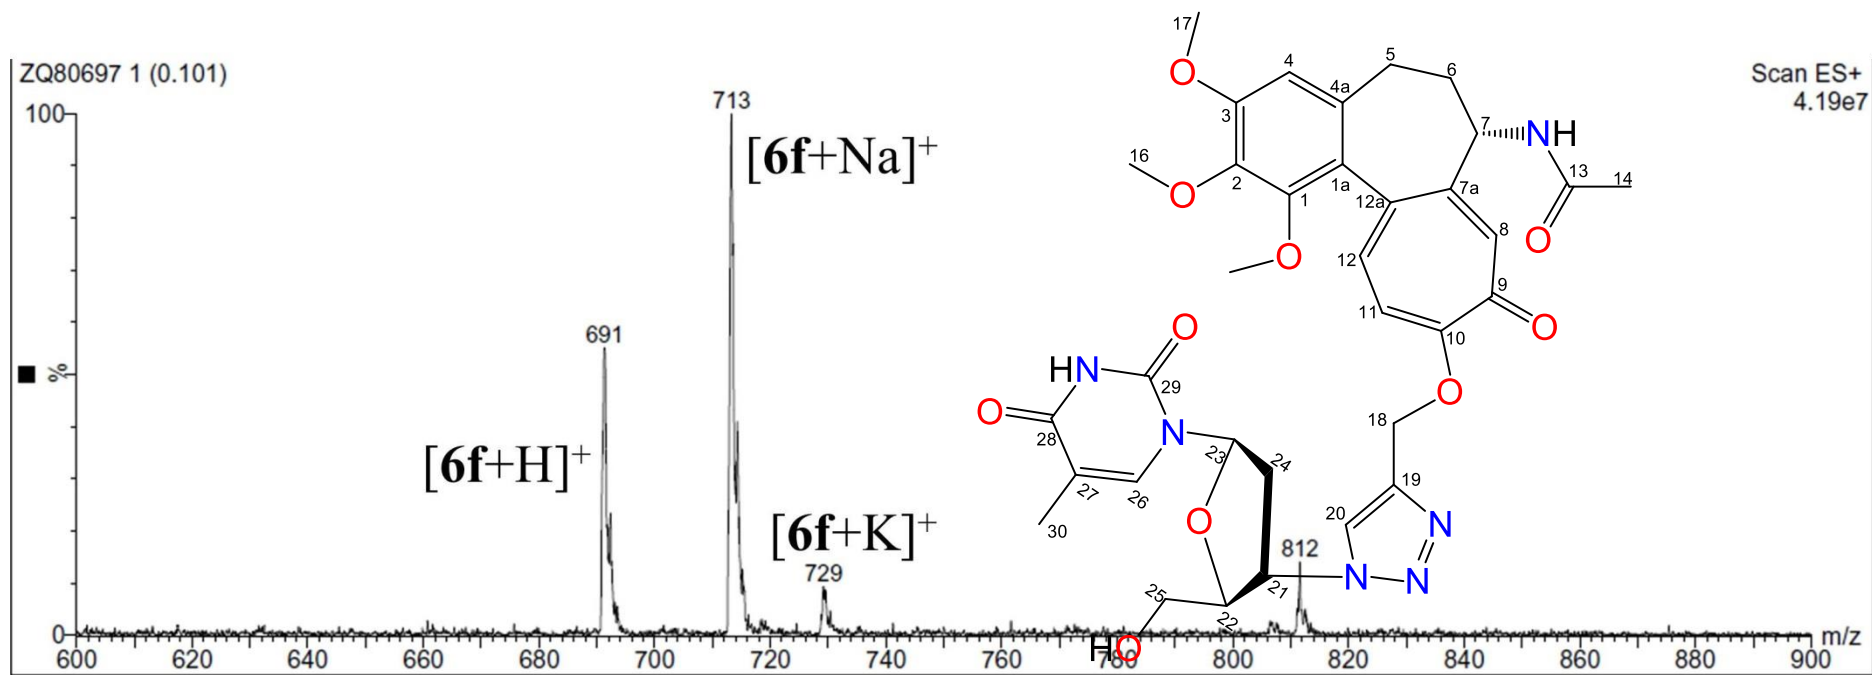

Figure 113S. ESI MS<sup>+</sup> spectrum of **6e**.



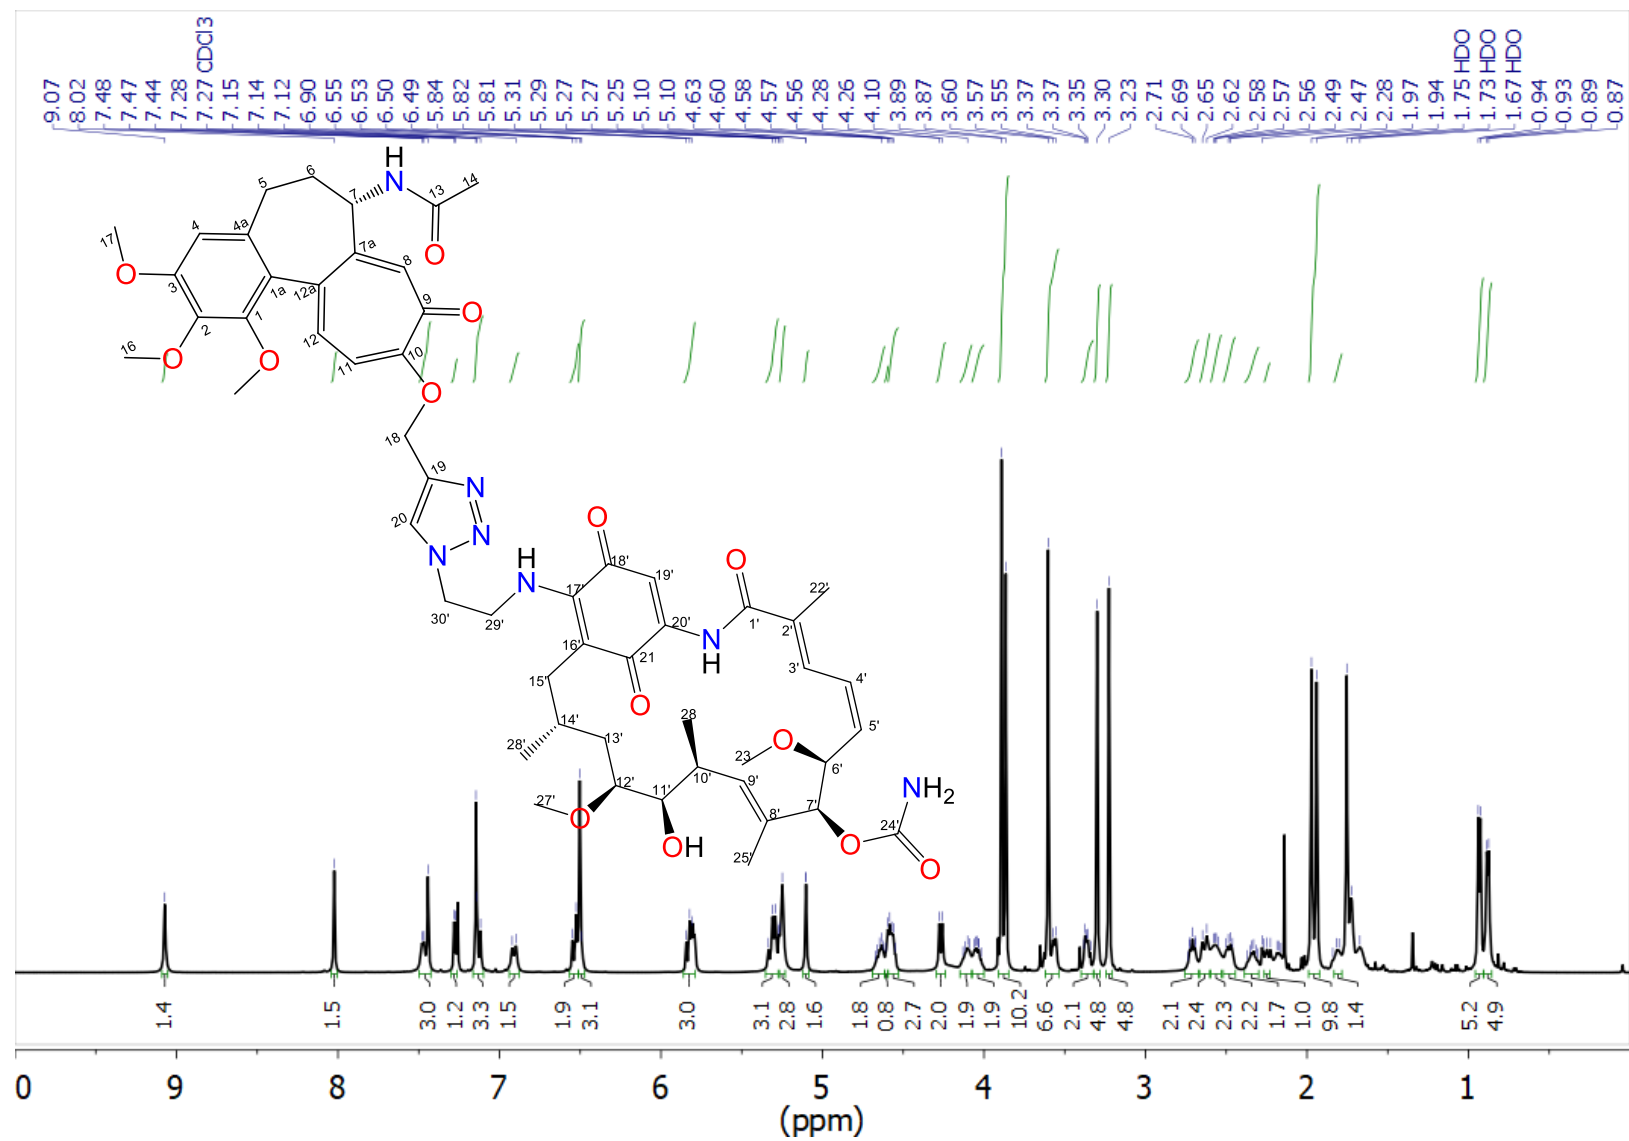

Figure 114S. <sup>1</sup>H NMR spectrum of compound **6f** in CDCl<sub>3</sub>.

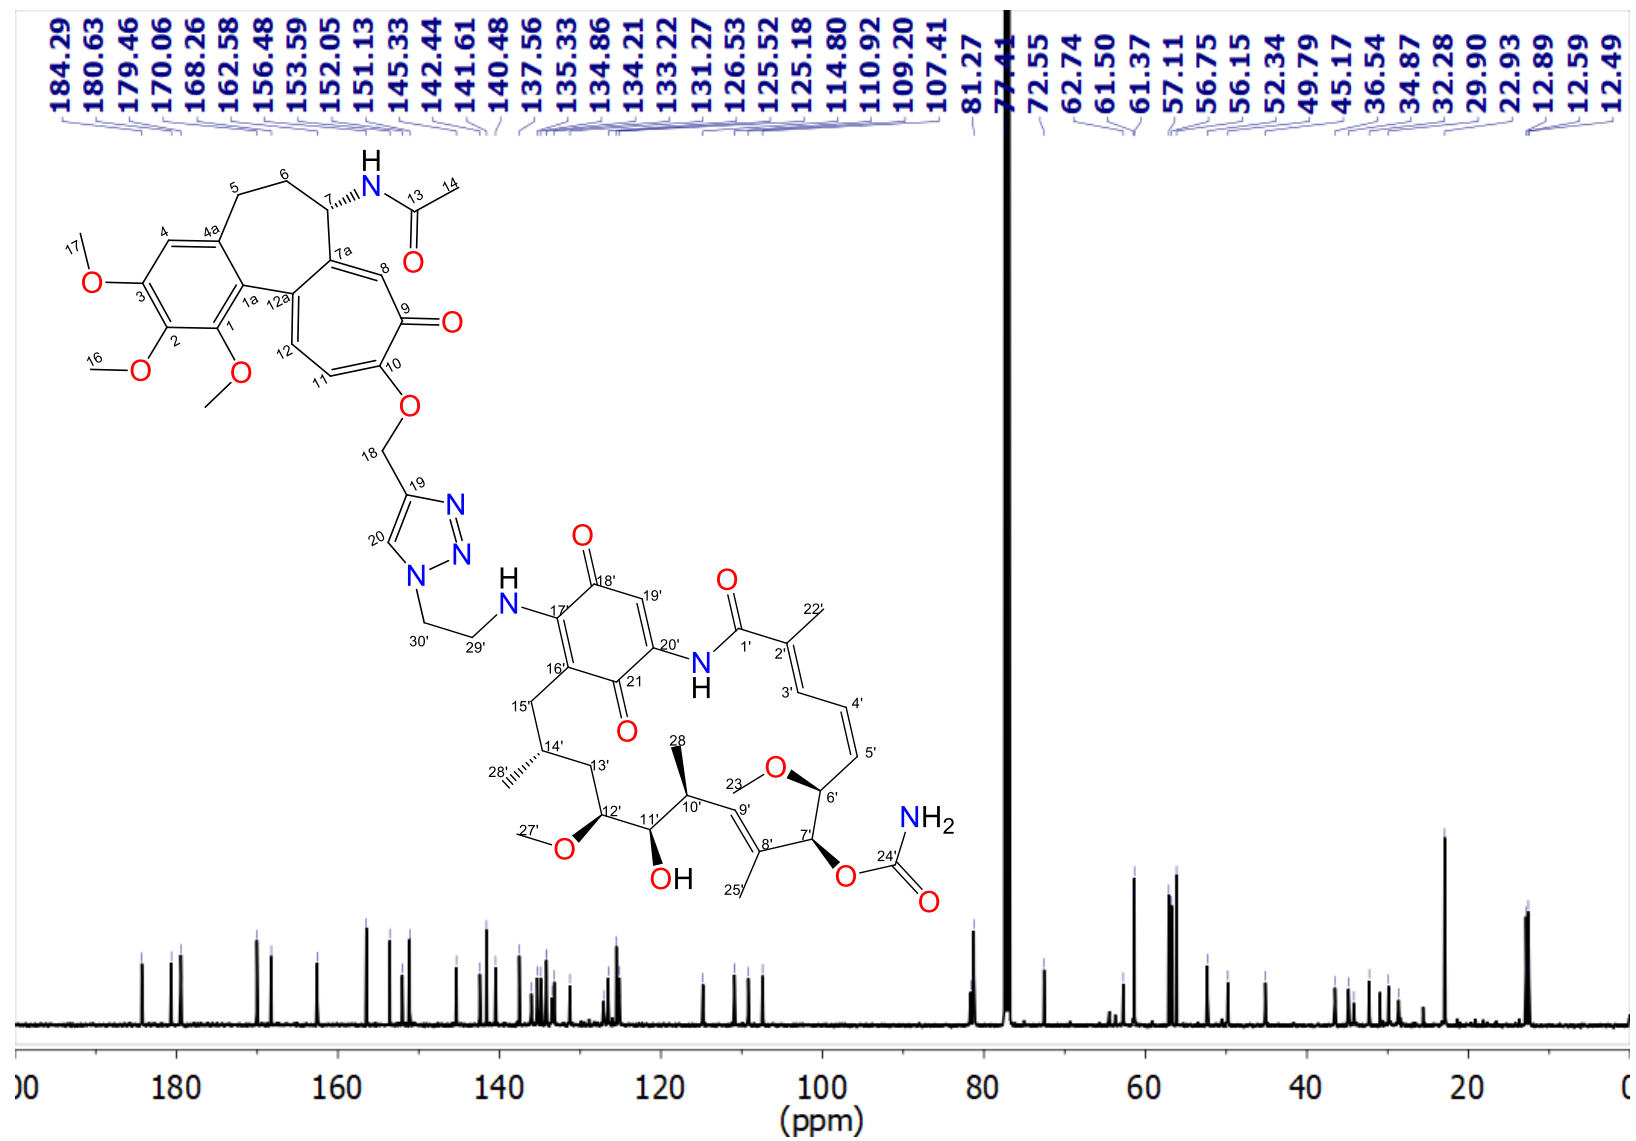

Figure 115S. <sup>13</sup>C NMR spectrum of compound **6f** in CDCl<sub>3</sub>.

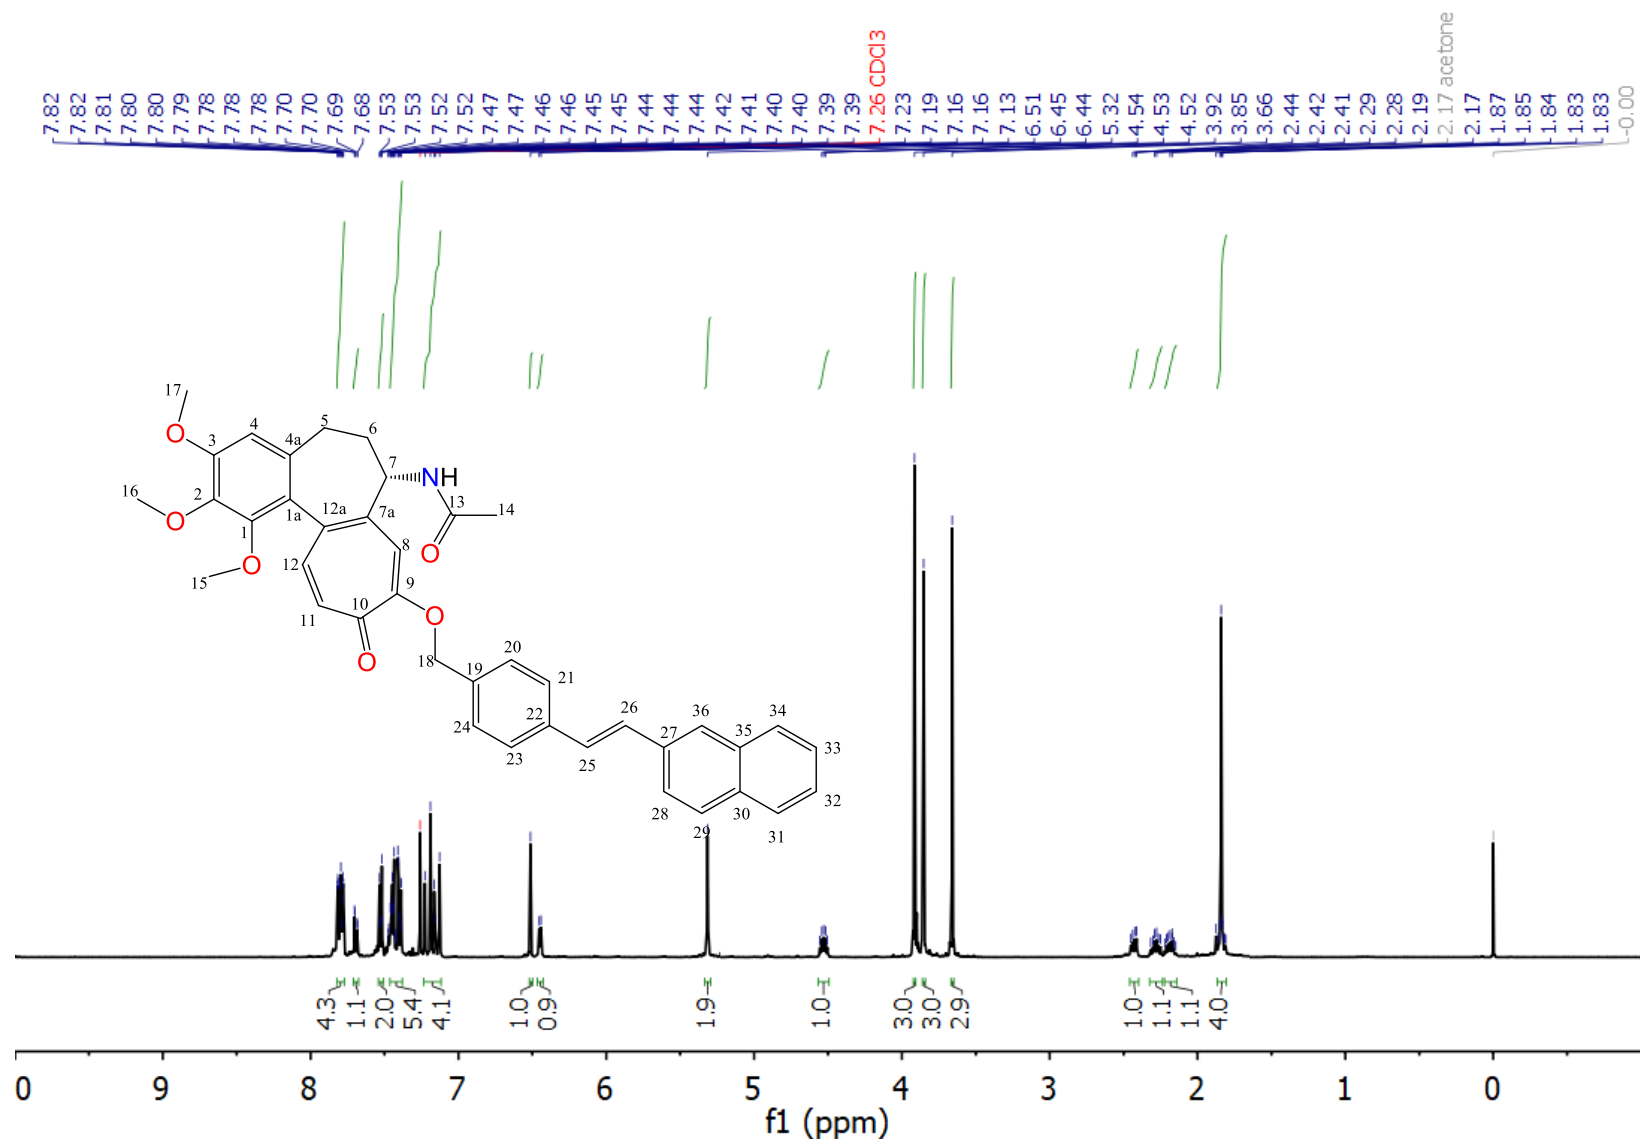

**Figure 116S.** <sup>1</sup>H NMR spectrum of compound **7a** in CDCl<sub>3</sub>.

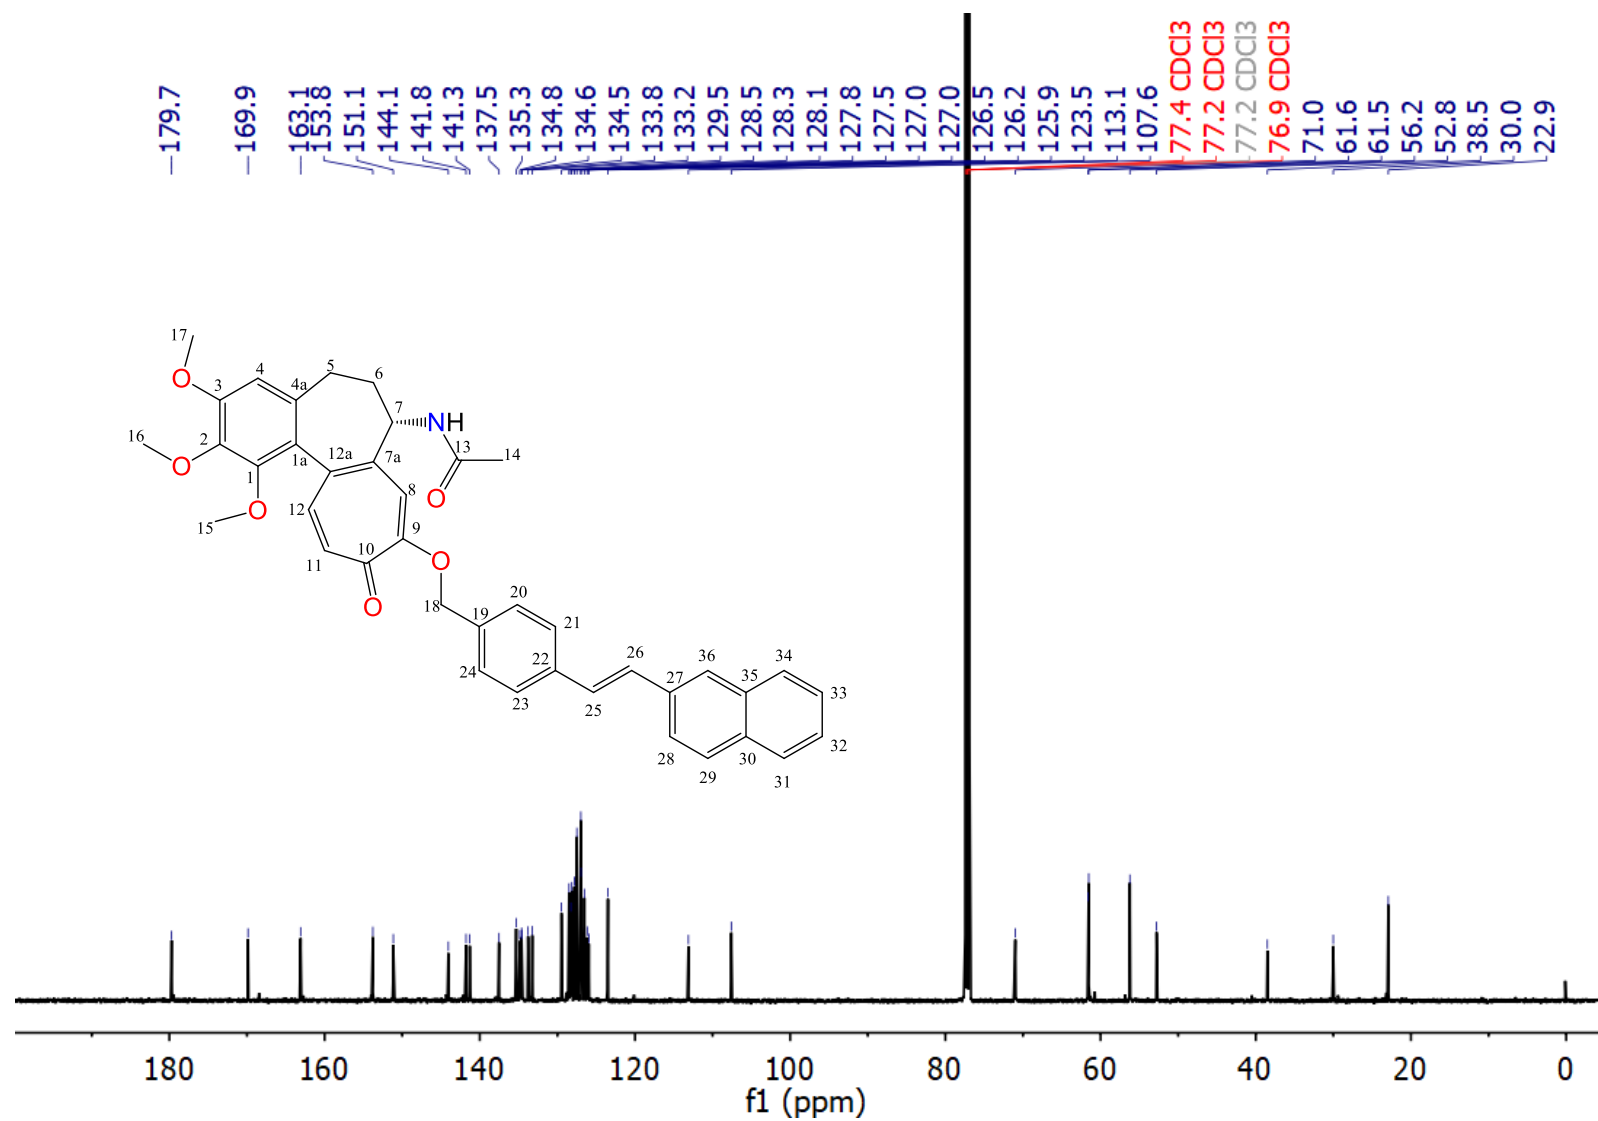

**Figure 117S.**  $^{13}\text{C}$  NMR spectrum of compound **7a** in  $\text{CDCl}_3$ .

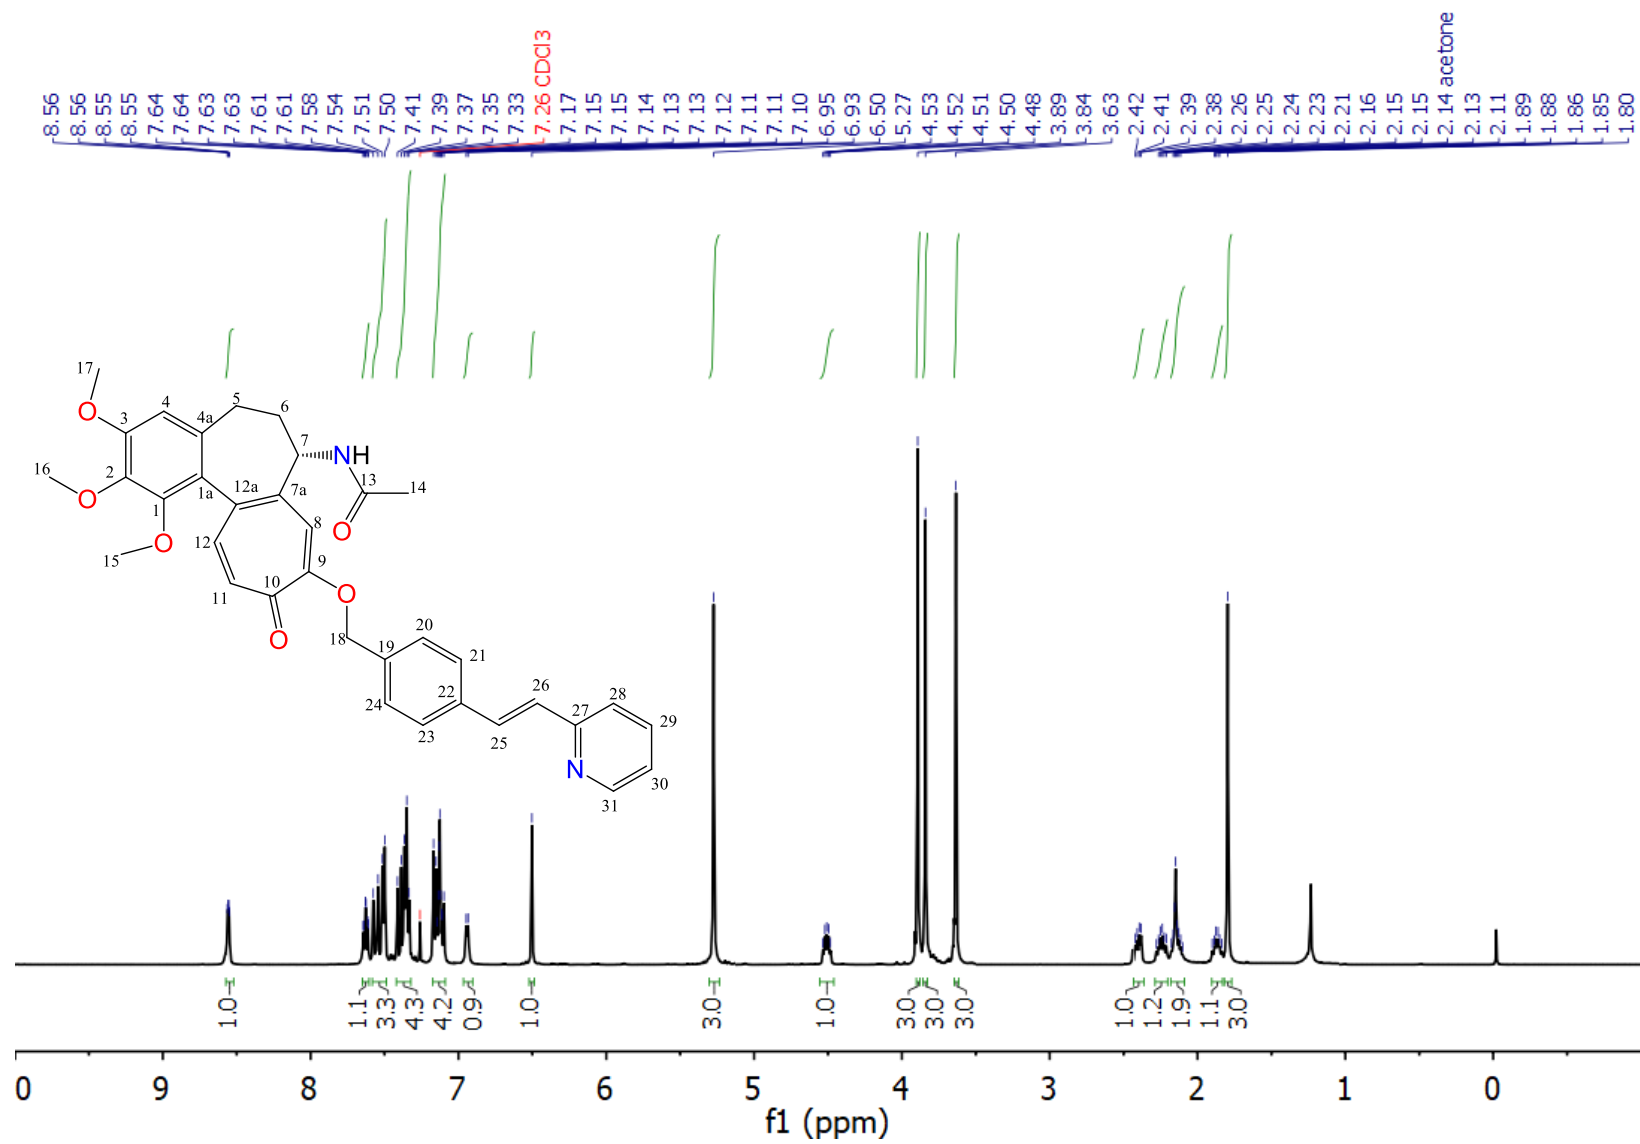

Figure 118S. <sup>1</sup>H NMR spectrum of compound **7b** in CDCl<sub>3</sub>.

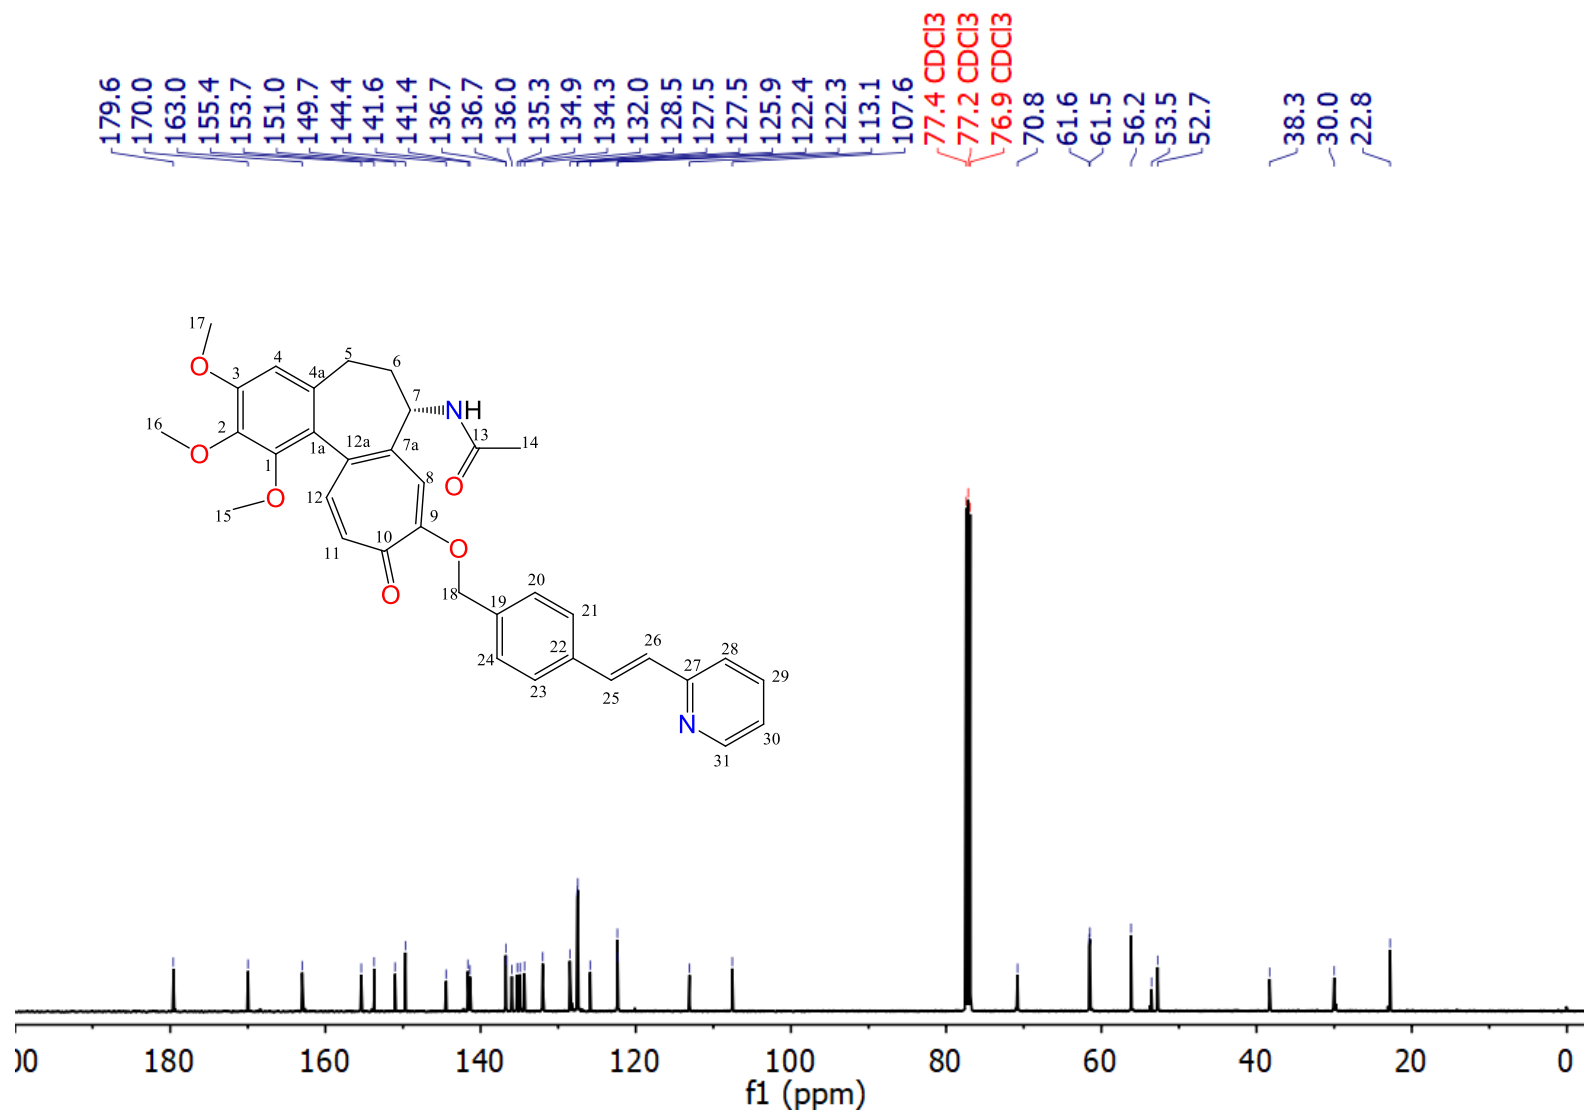

**Figure 119S.** <sup>13</sup>C NMR spectrum of compound **7b** in CDCl<sub>3</sub>.

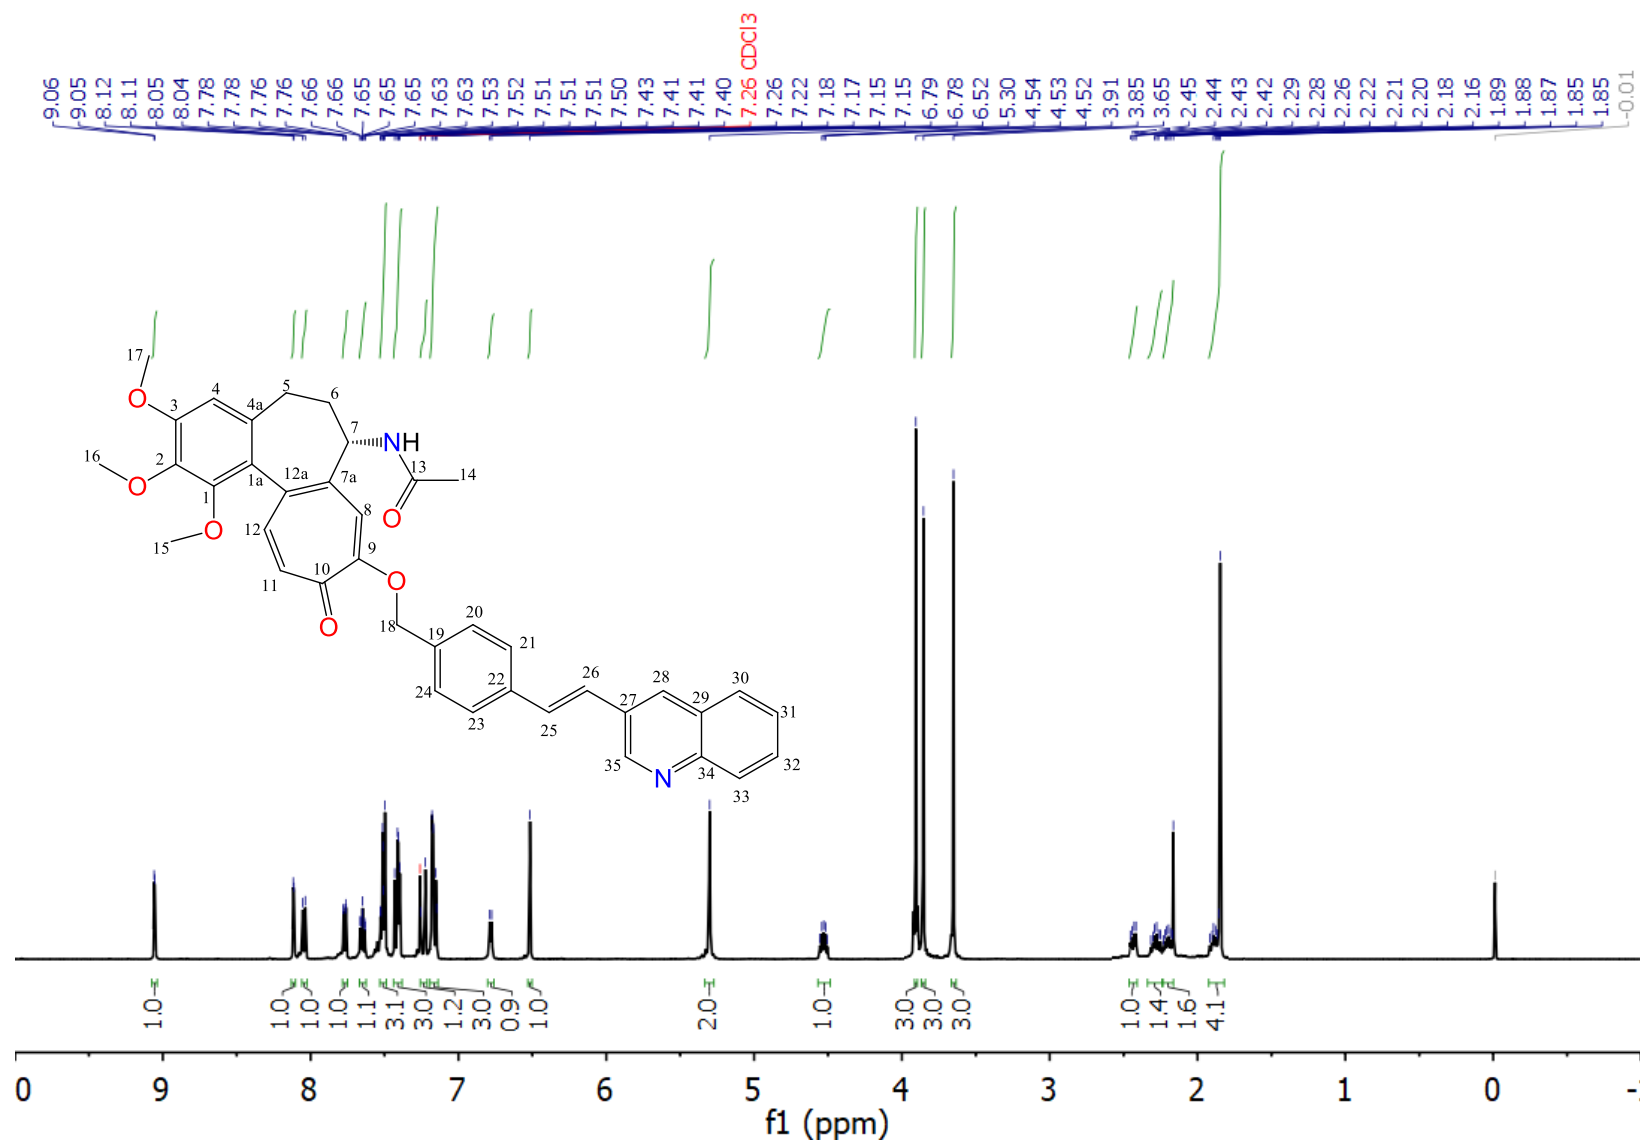

**Figure 120S.** <sup>1</sup>H NMR spectrum of compound **7c** in CDCl<sub>3</sub>.

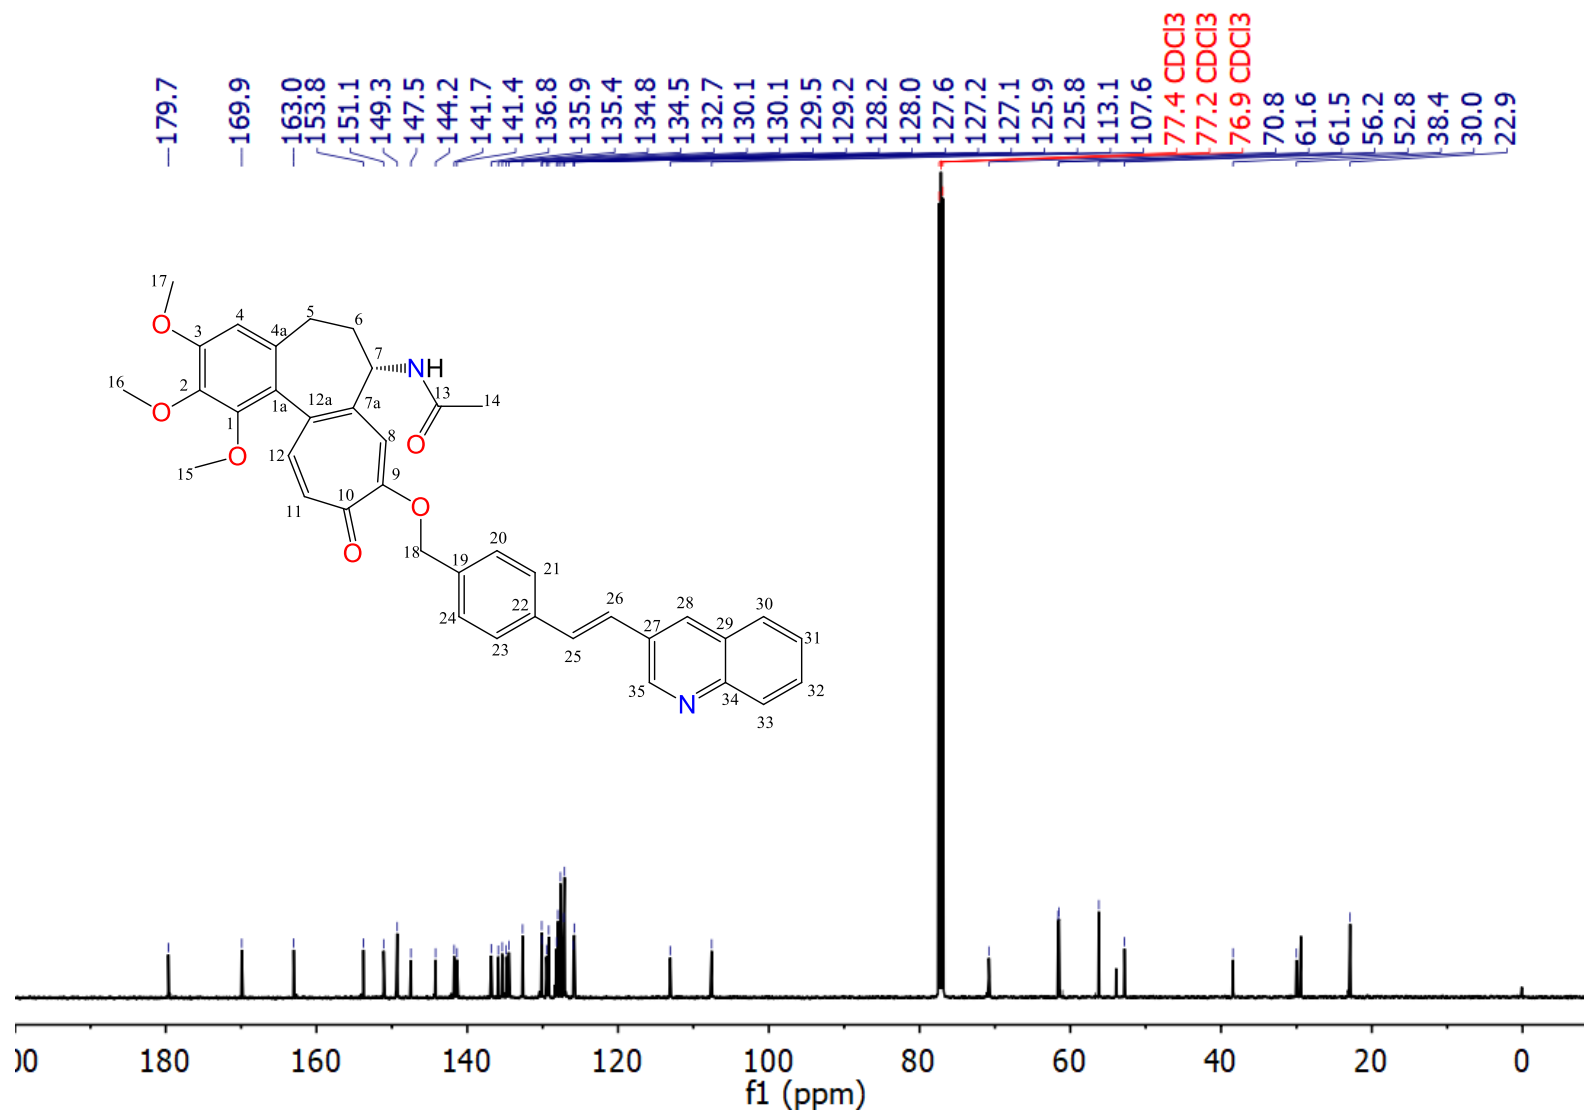

**Figure 121S.**  $^{13}\text{C}$  NMR spectrum of compound **7c** in  $\text{CDCl}_3$ .



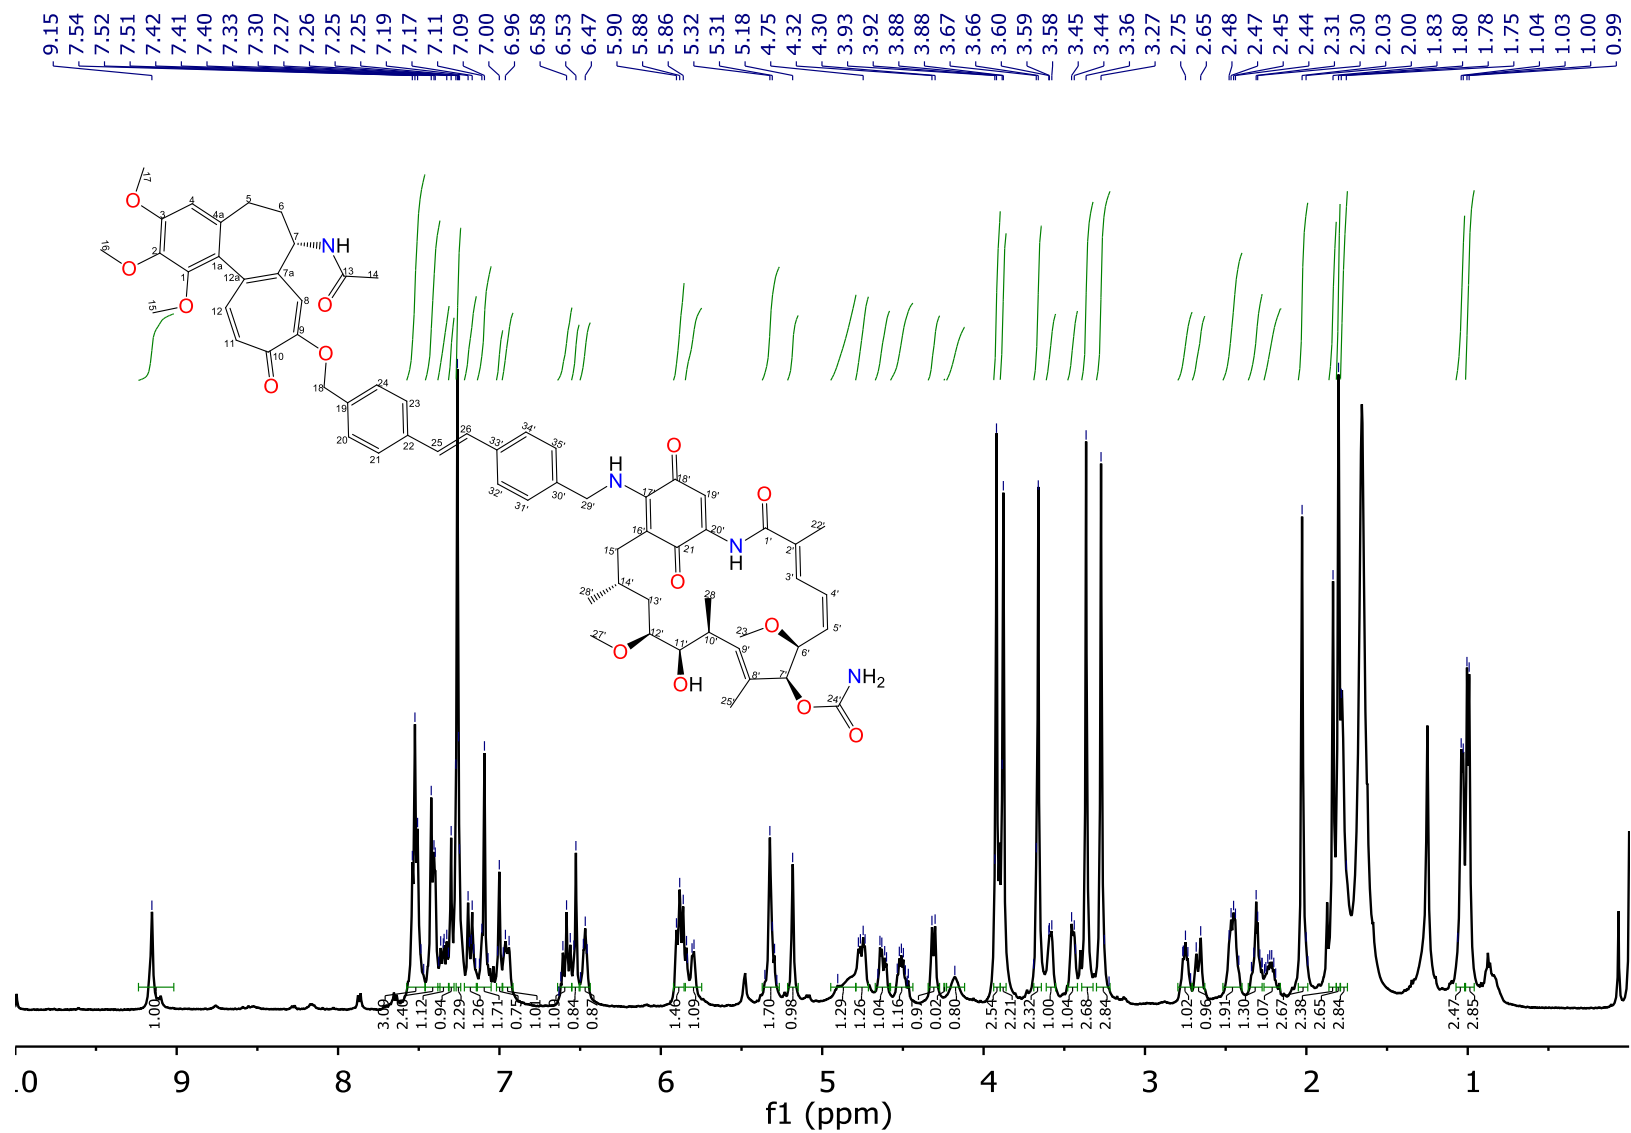

**Figure 122S.**  $^1\text{H}$  NMR spectrum of compound **7d** in  $\text{CDCl}_3$ .

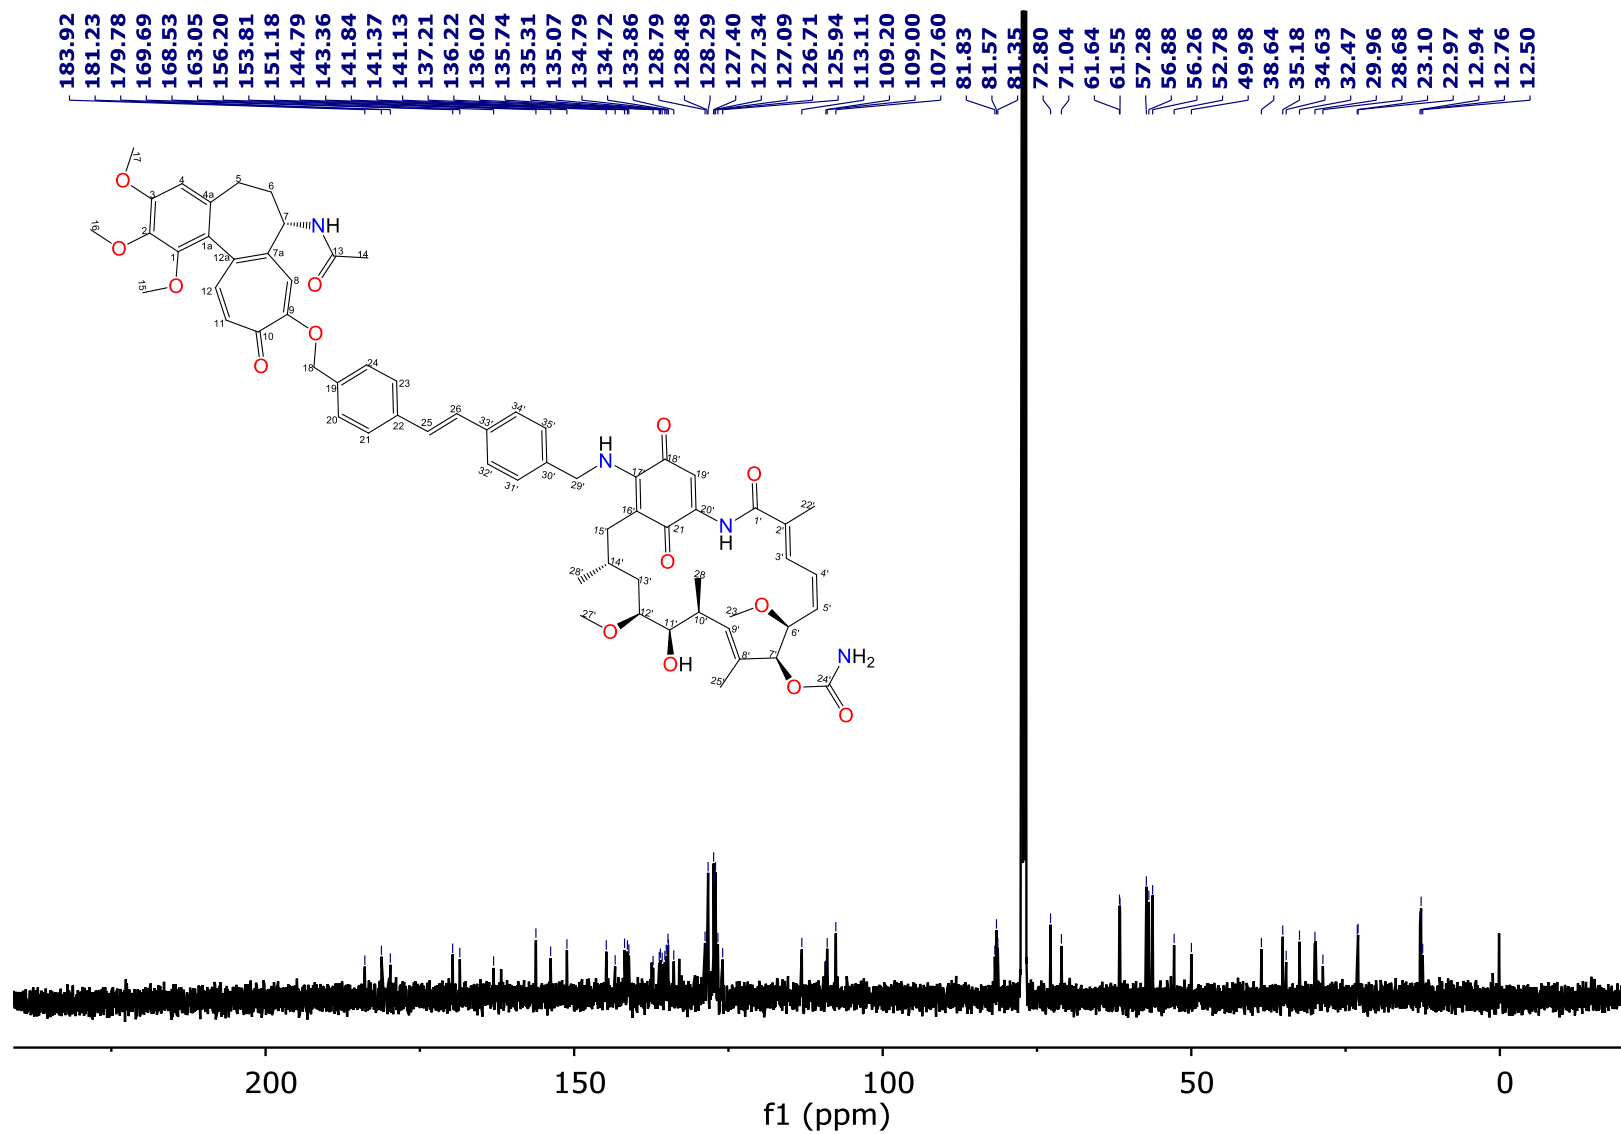

Figure 123S. <sup>13</sup>C NMR spectrum of compound **7d** in CDCl<sub>3</sub>.

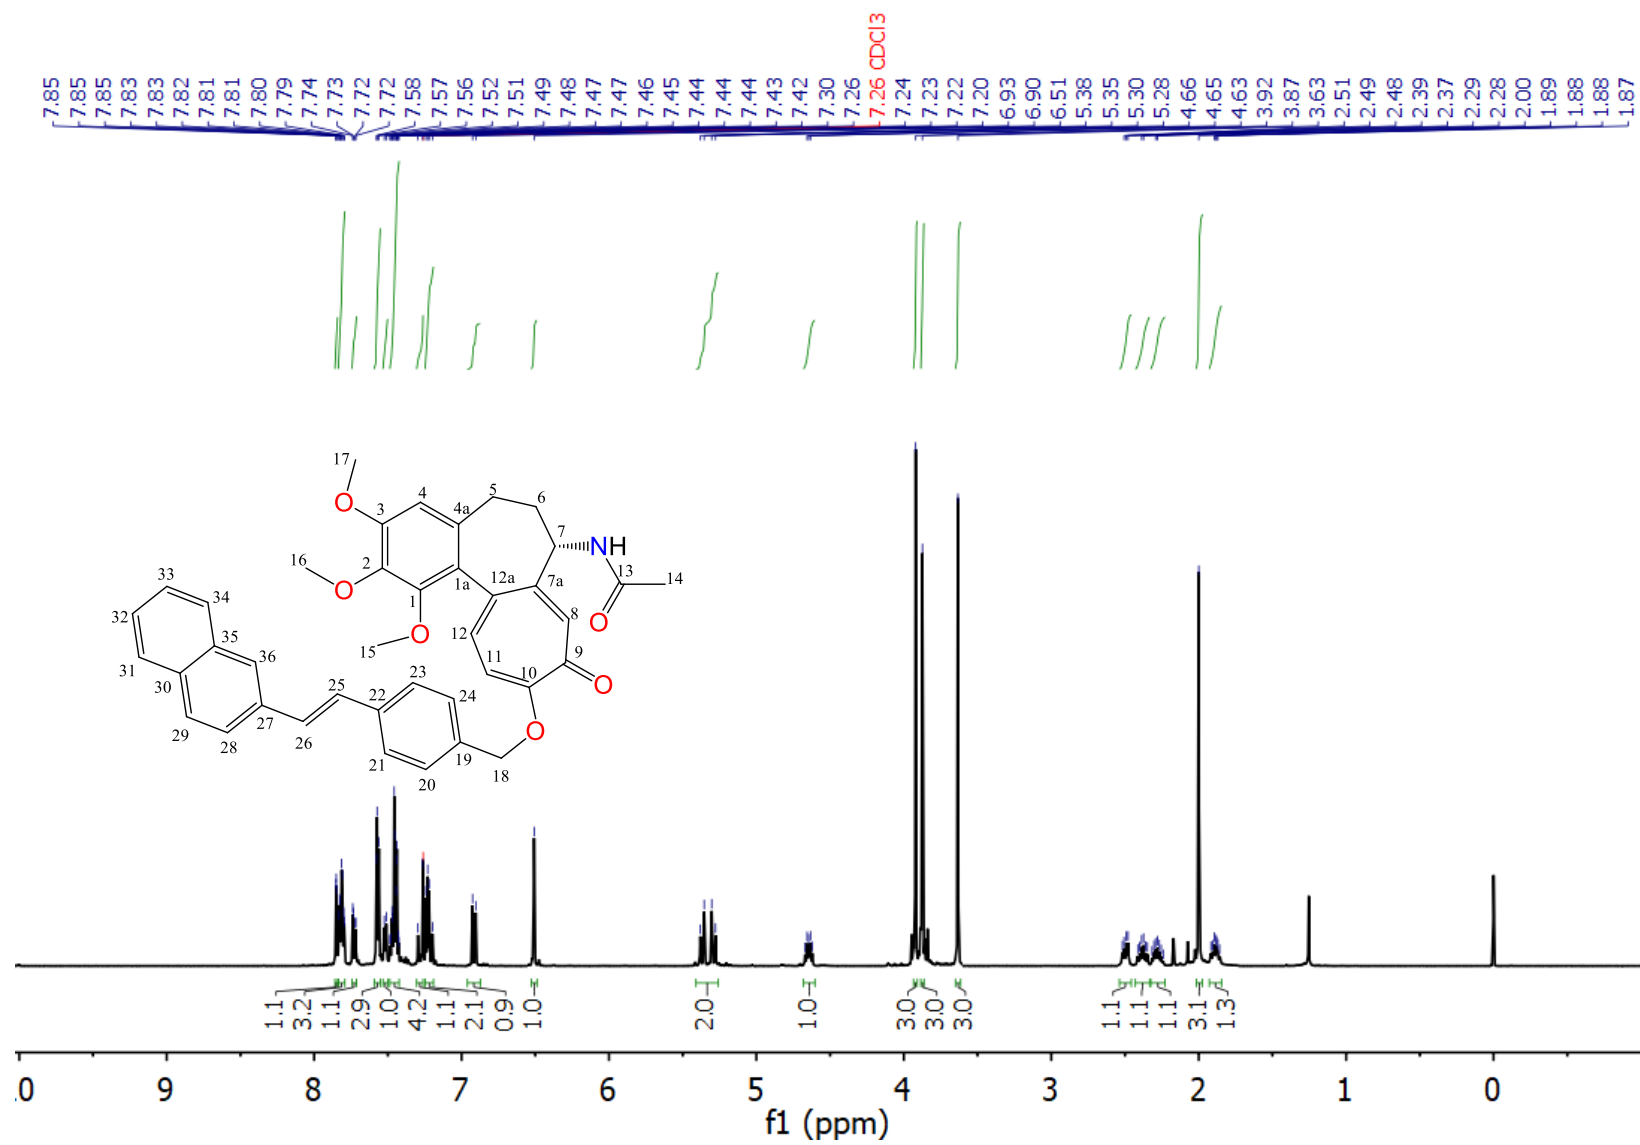

**Figure 124S.** <sup>1</sup>H NMR spectrum of compound **8a** in CDCl<sub>3</sub>.

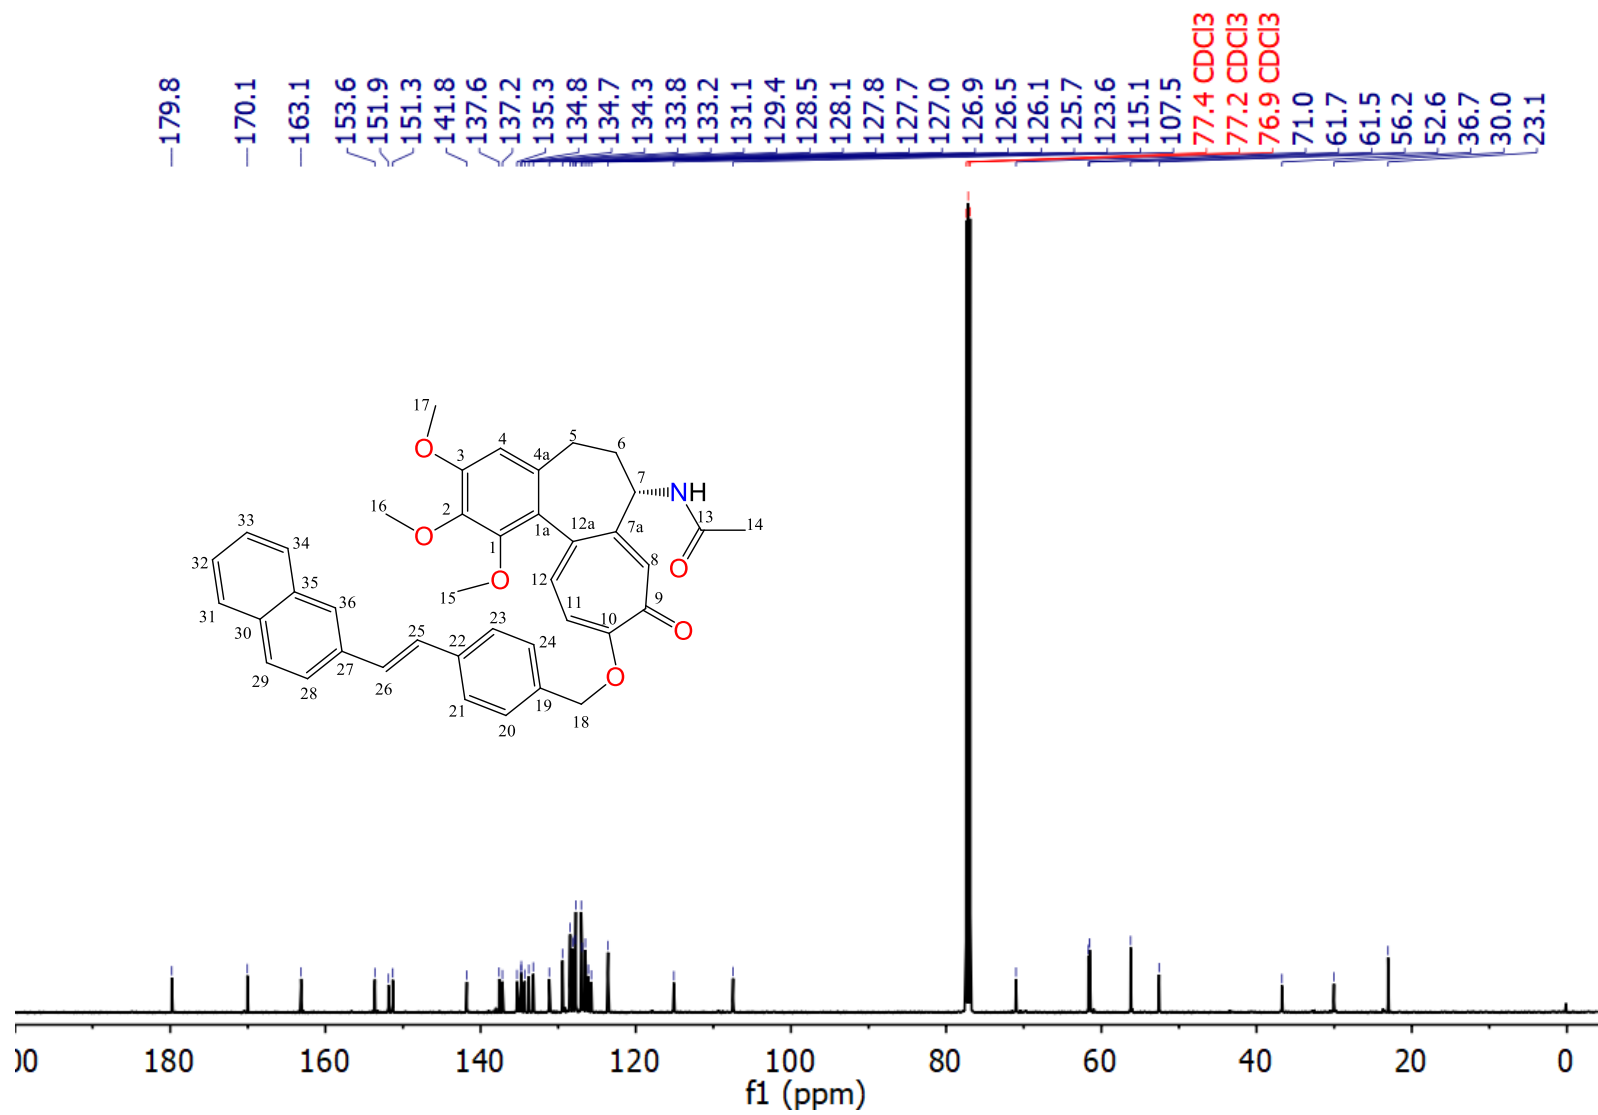

**Figure 125S.**  $^{13}\text{C}$  NMR spectrum of compound **8a** in  $\text{CDCl}_3$ .

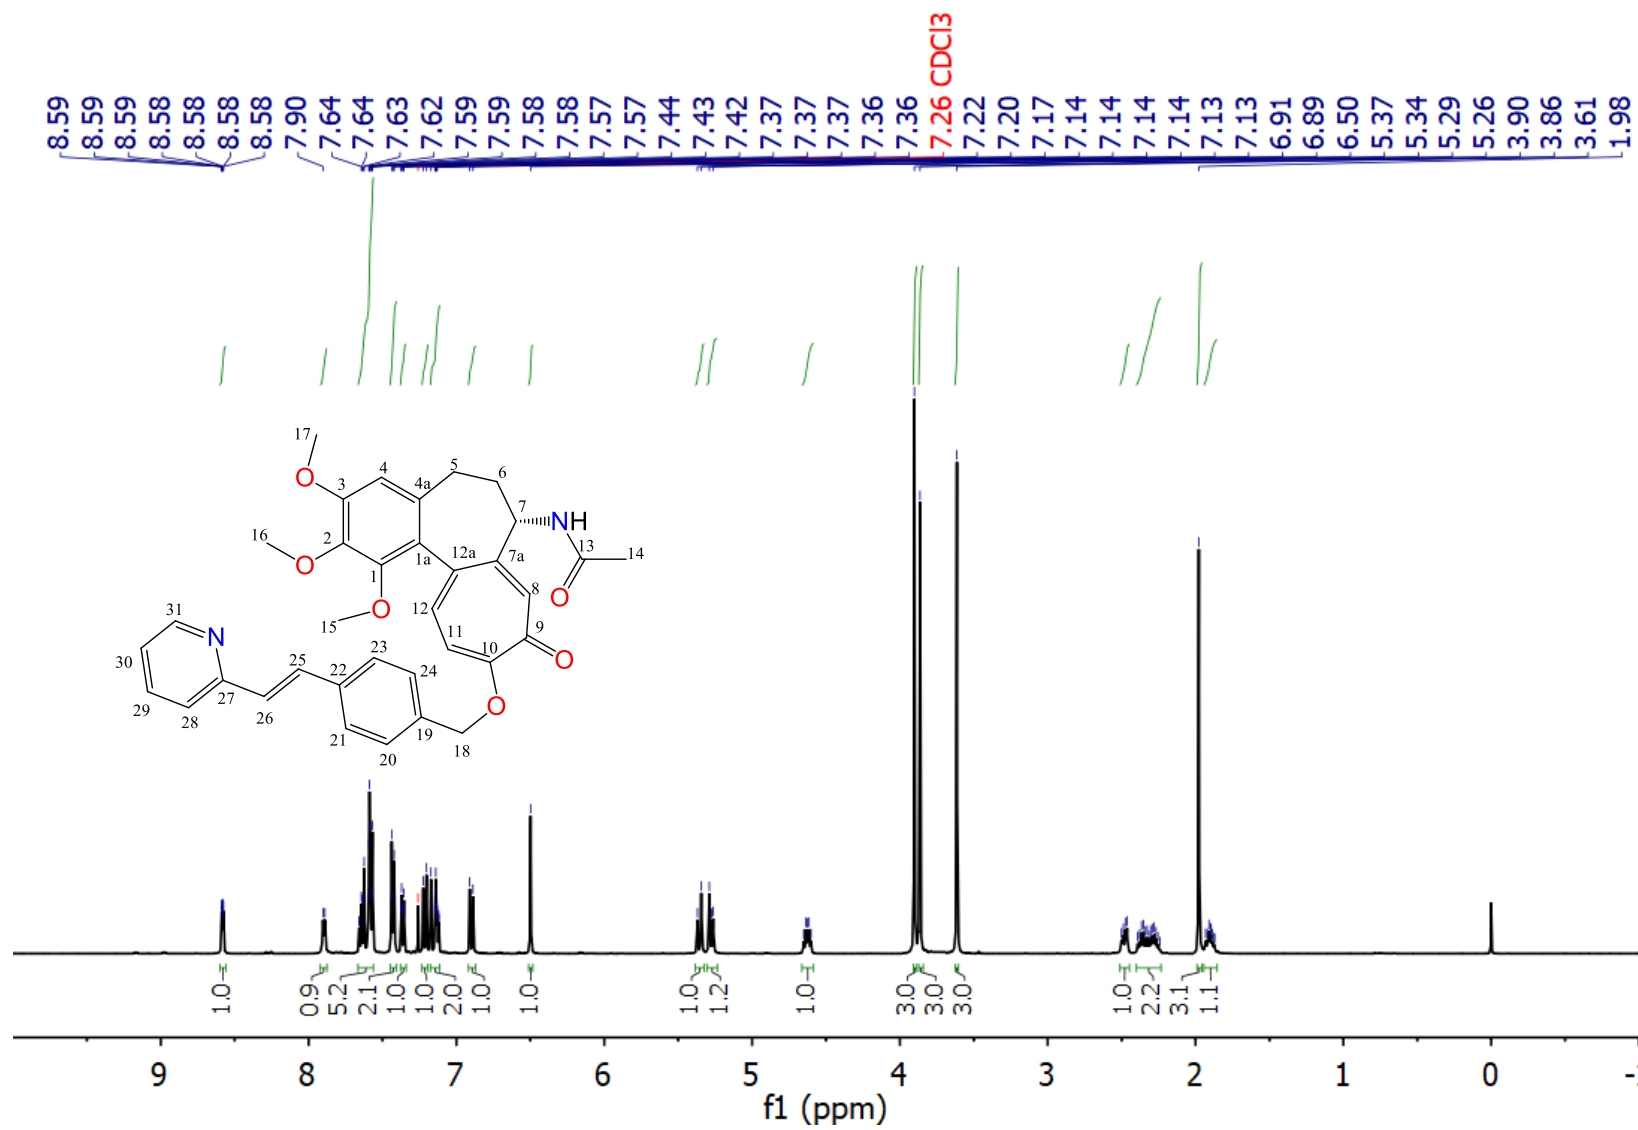

**Figure 126S.** <sup>1</sup>H NMR spectrum of compound **8b** in CDCl<sub>3</sub>.

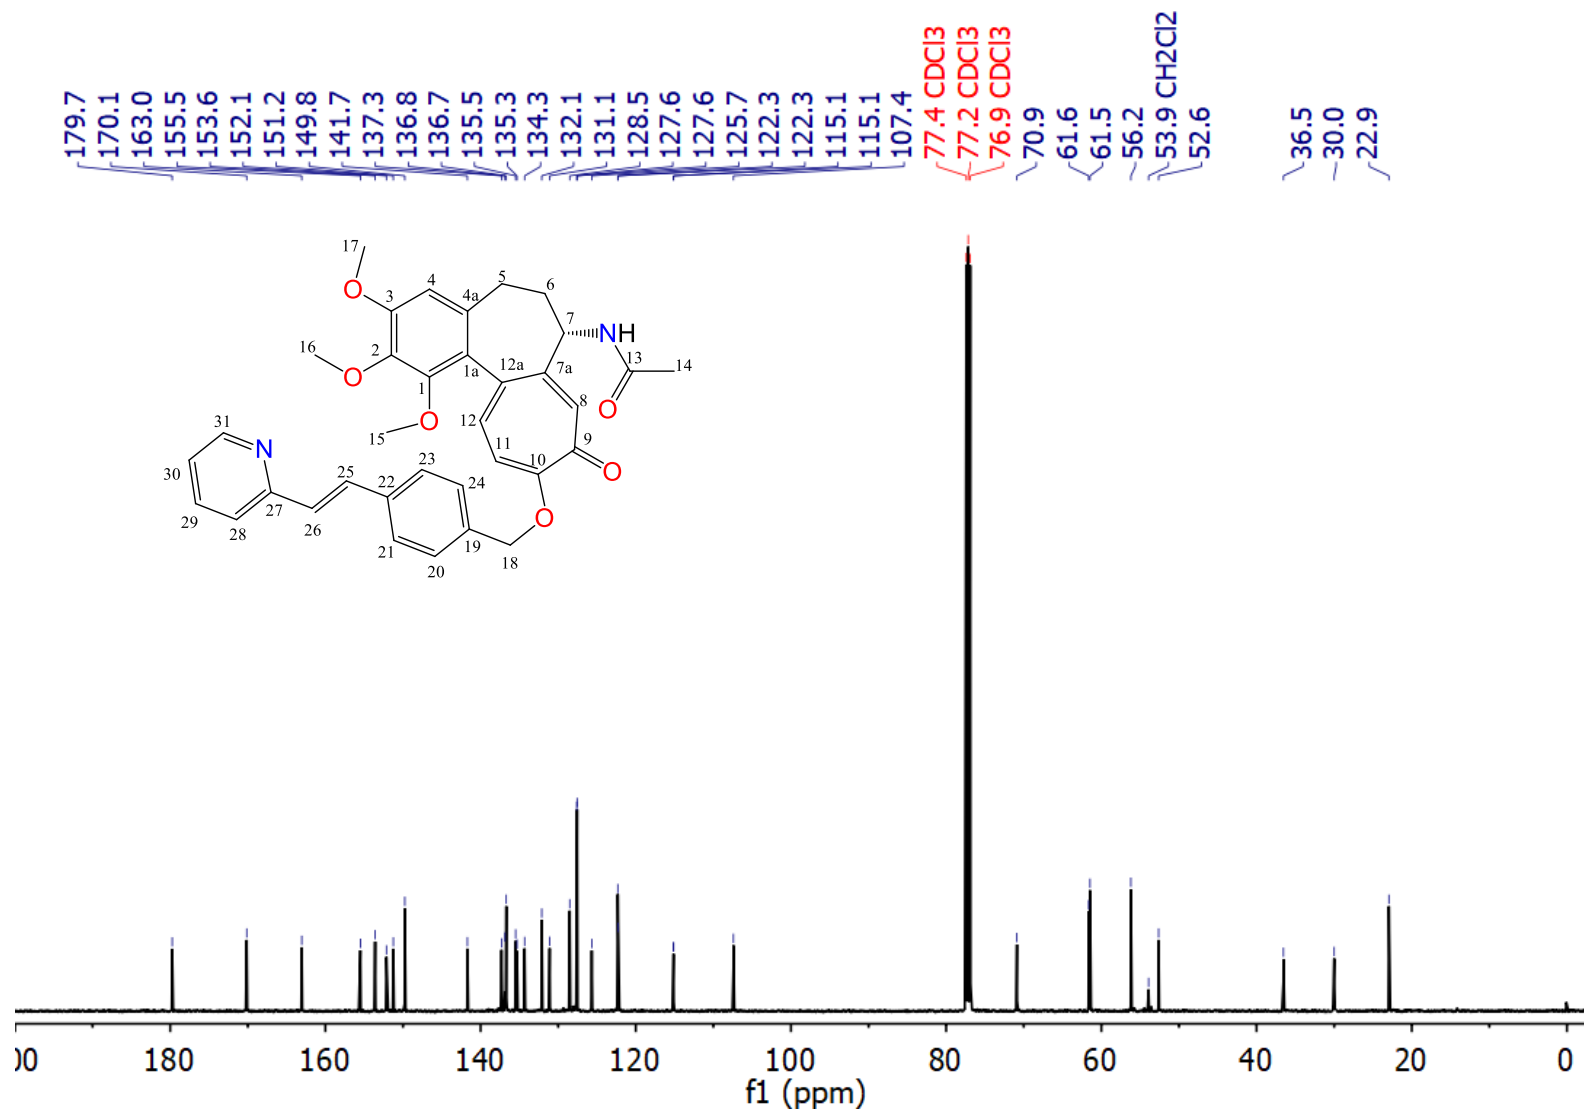

**Figure 127S.**  $^{13}\text{C}$  NMR spectrum of compound **8b** in  $\text{CDCl}_3$ .

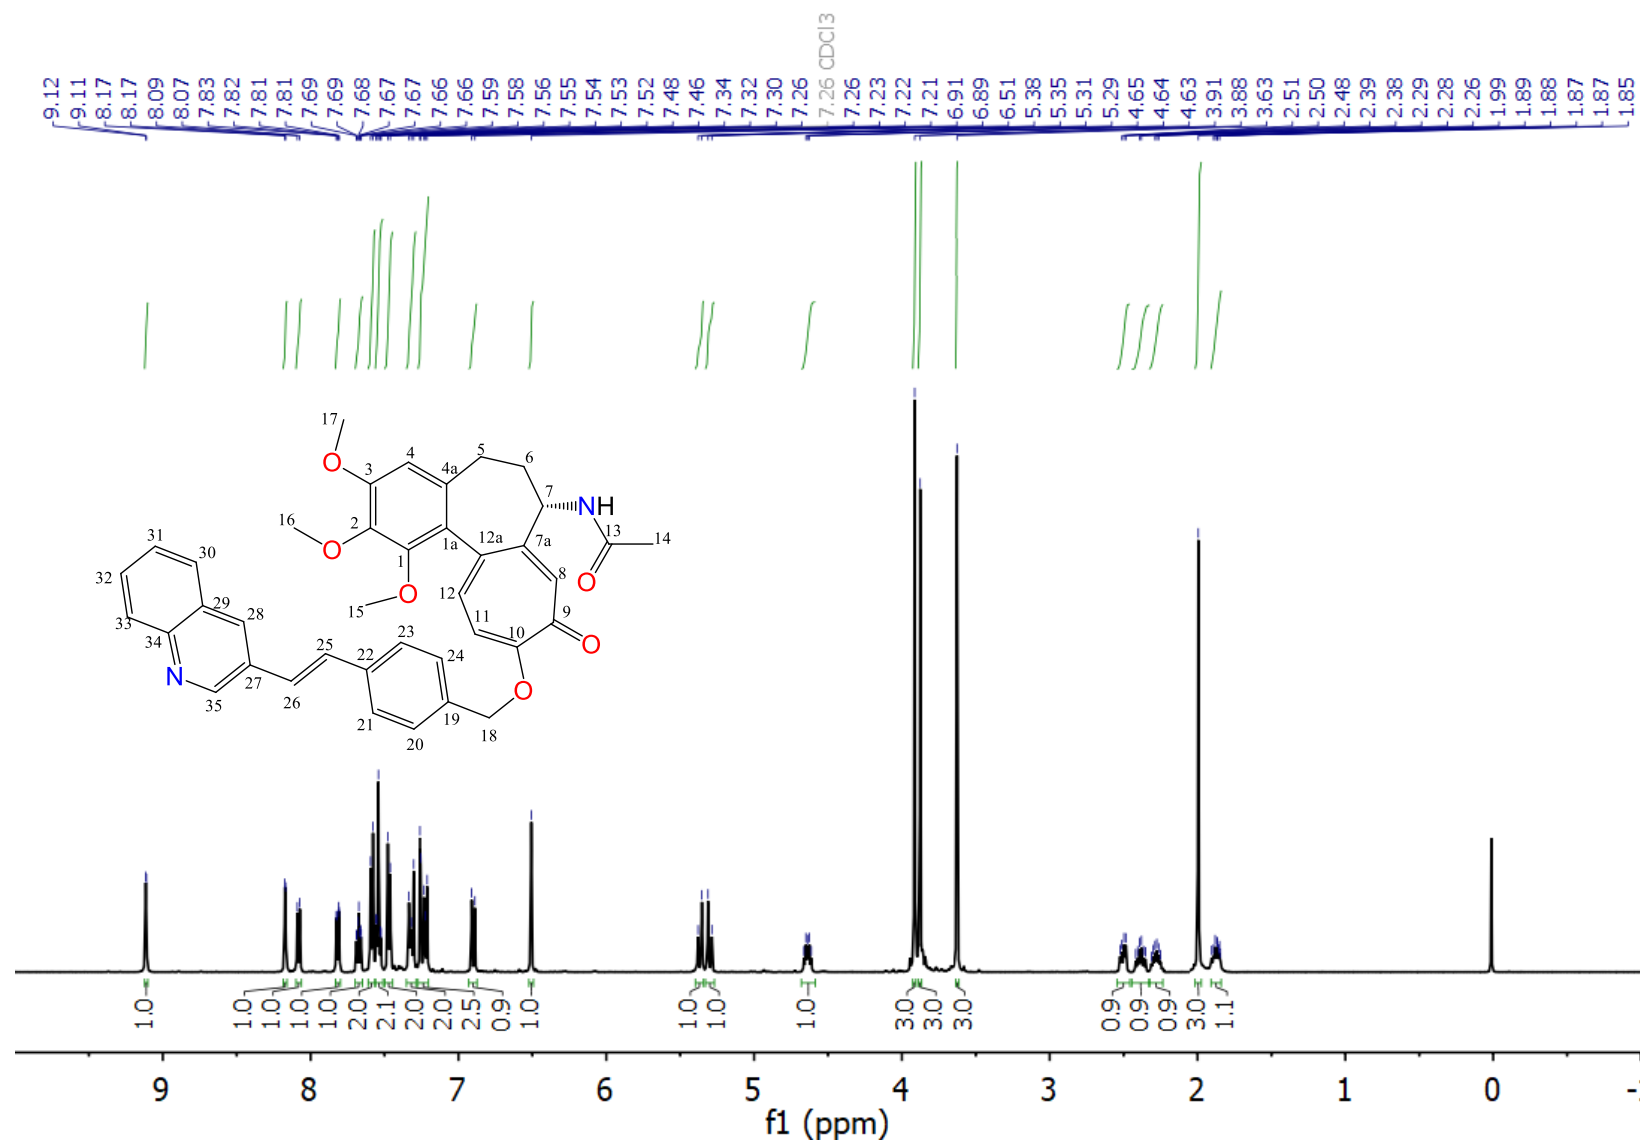

**Figure 128S.** <sup>1</sup>H NMR spectrum of compound **8c** in CDCl<sub>3</sub>.

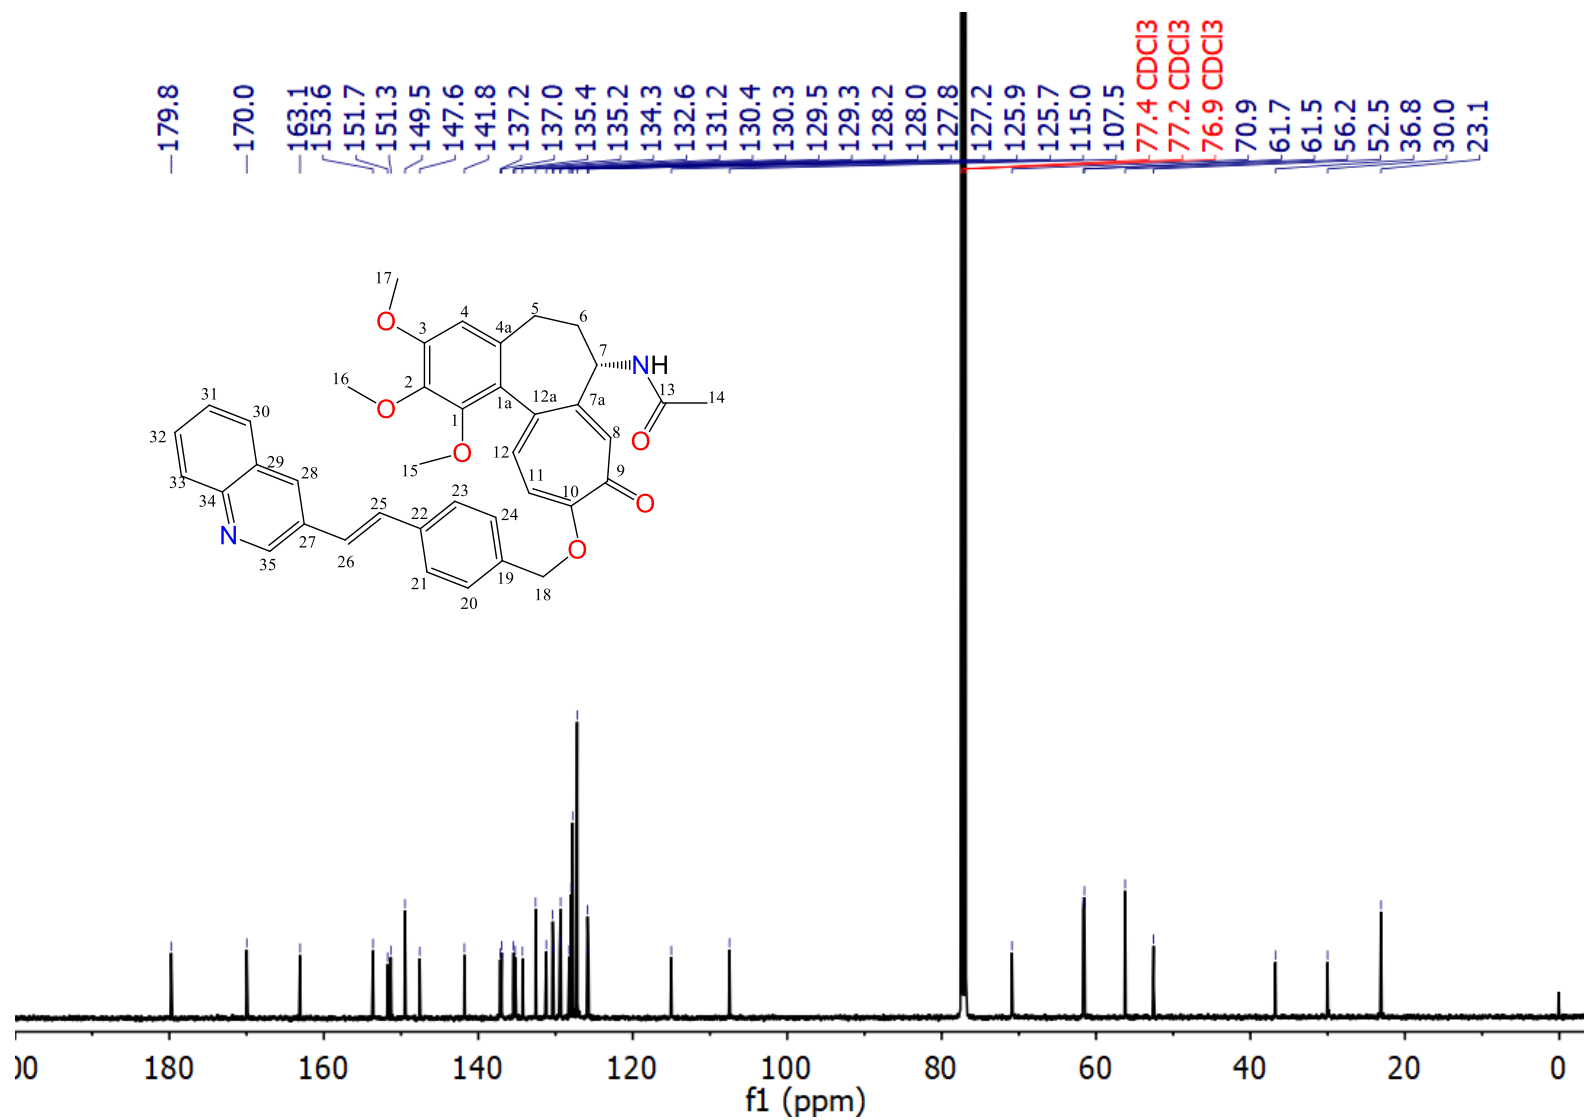

**Figure 129S.** <sup>13</sup>C NMR spectrum of compound **8c** in CDCl<sub>3</sub>.



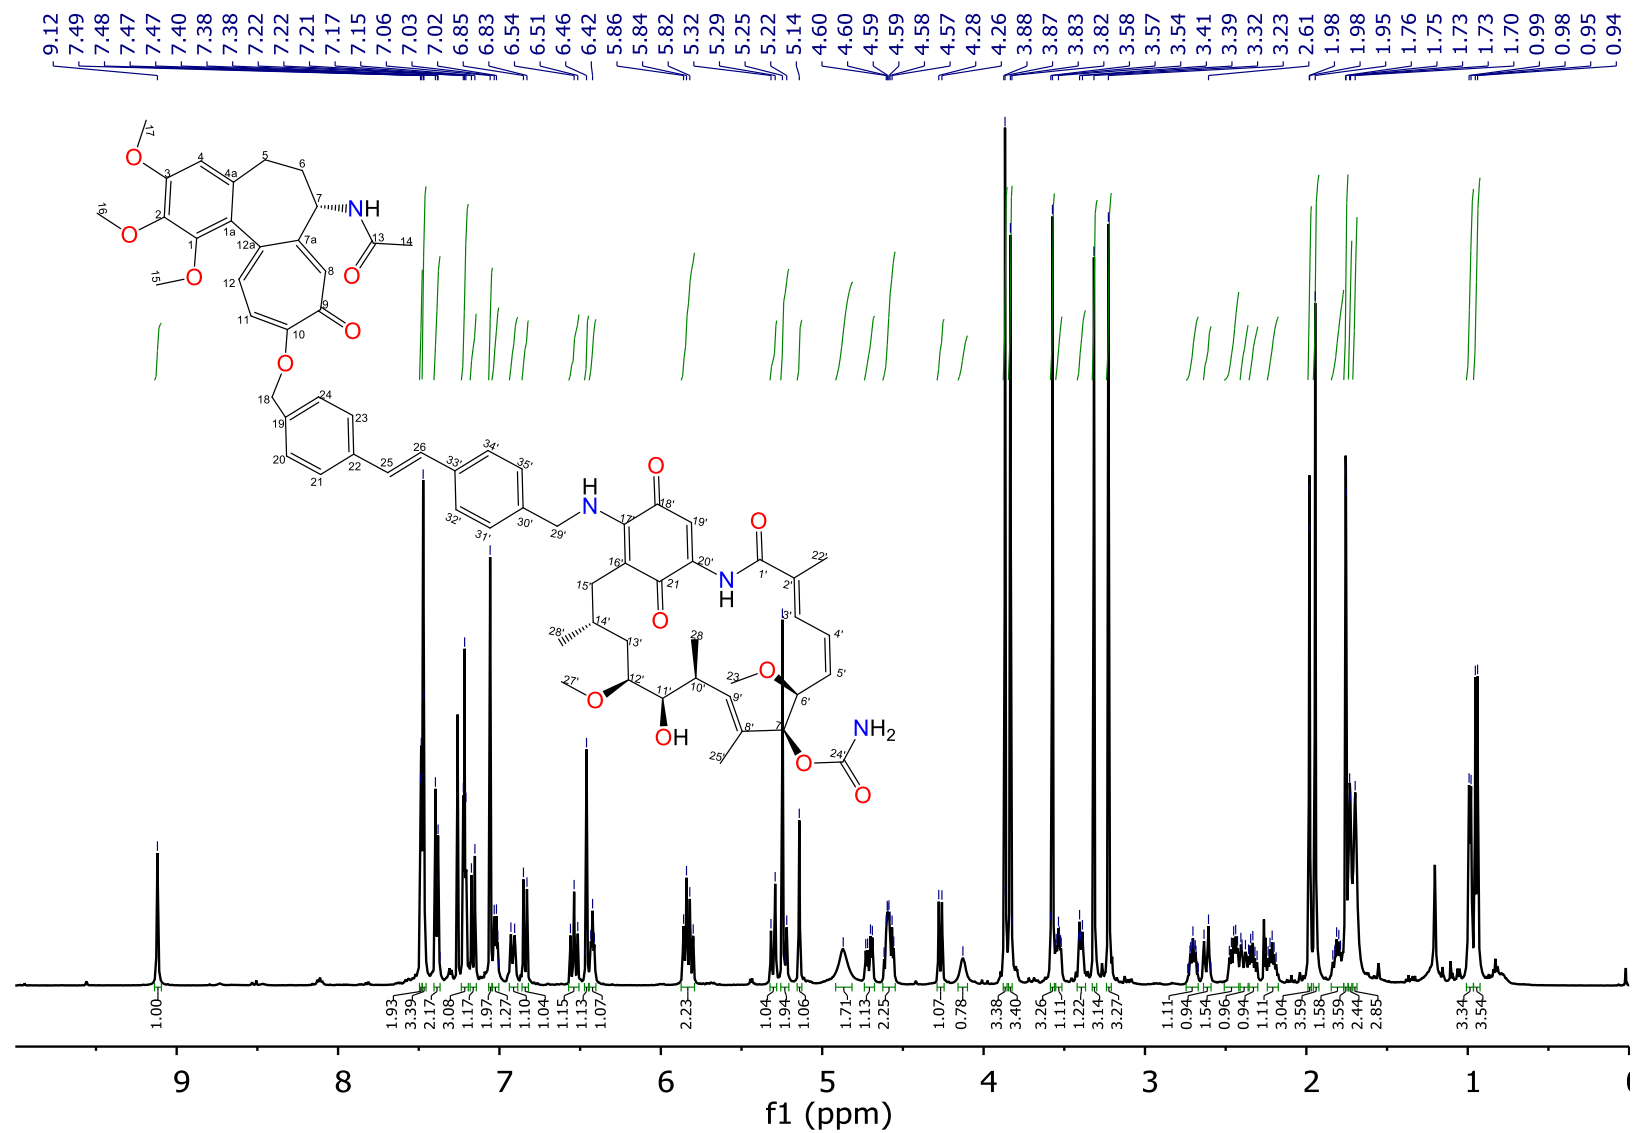

**Figure 130S.** <sup>1</sup>H NMR spectrum of compound **8d** in CDCl<sub>3</sub>.

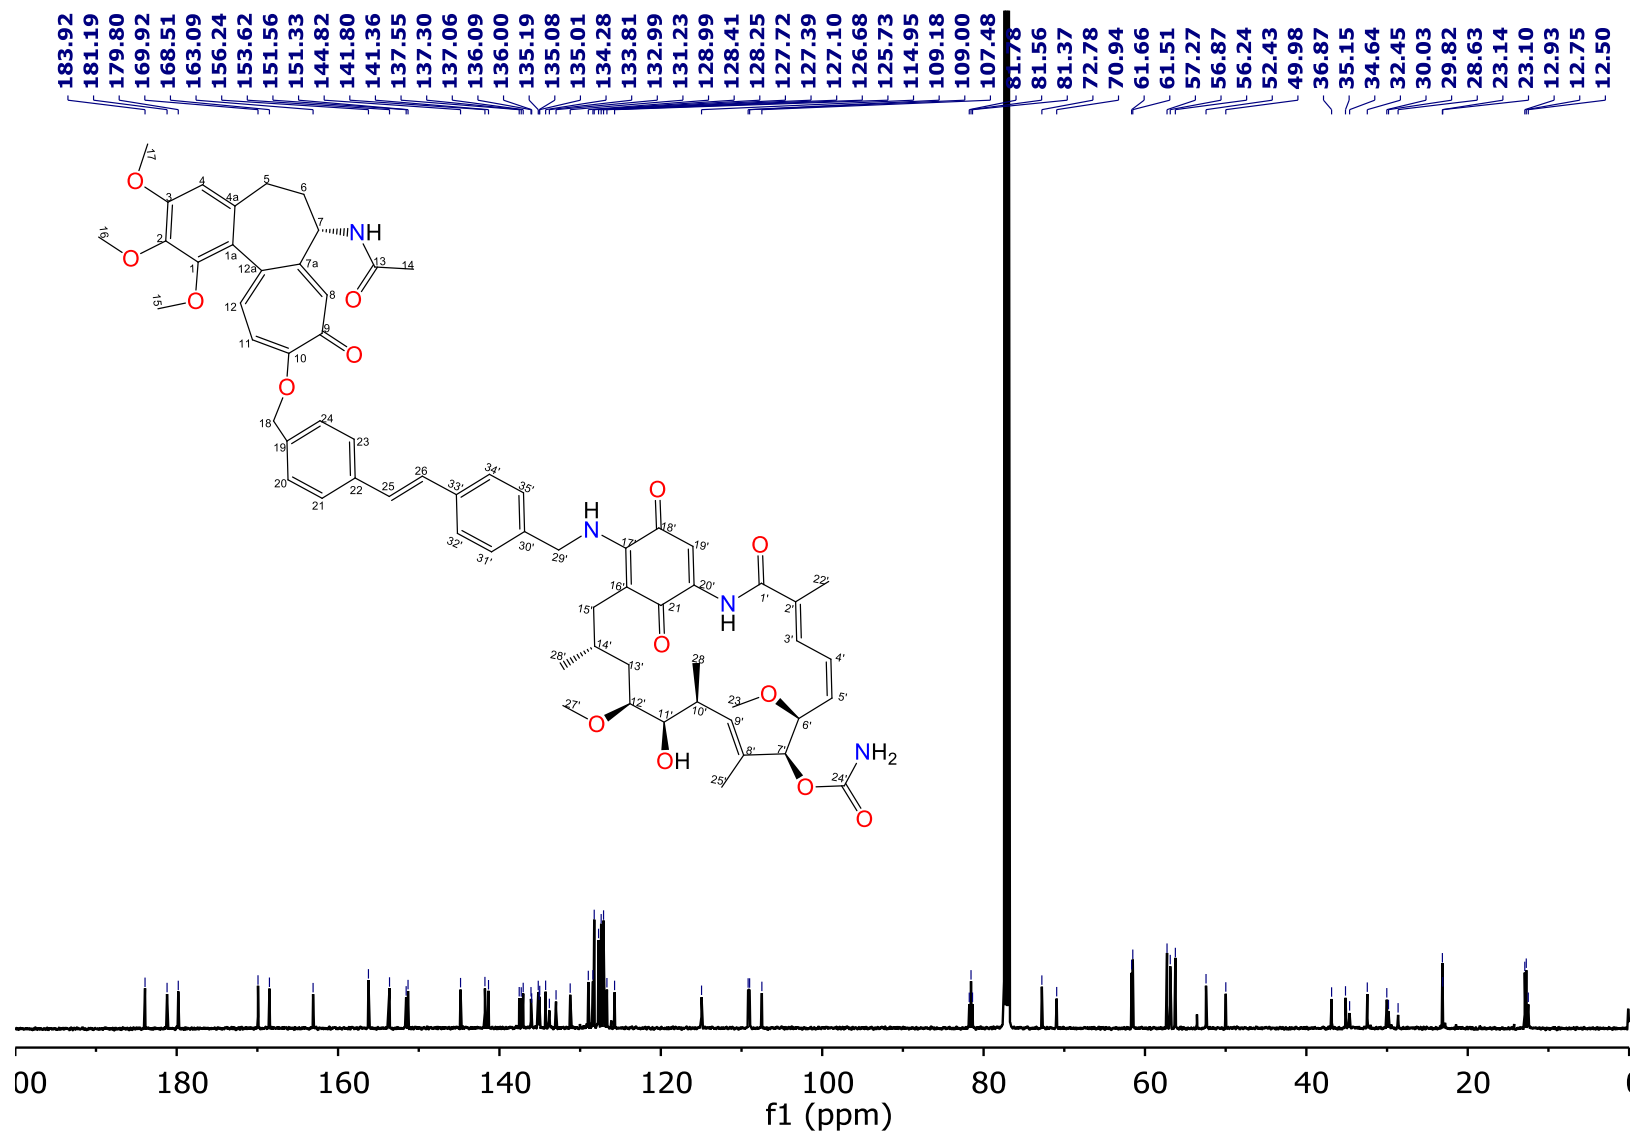

**Figure 131S.** <sup>13</sup>C NMR spectrum of compound **8d** in CDCl<sub>3</sub>.

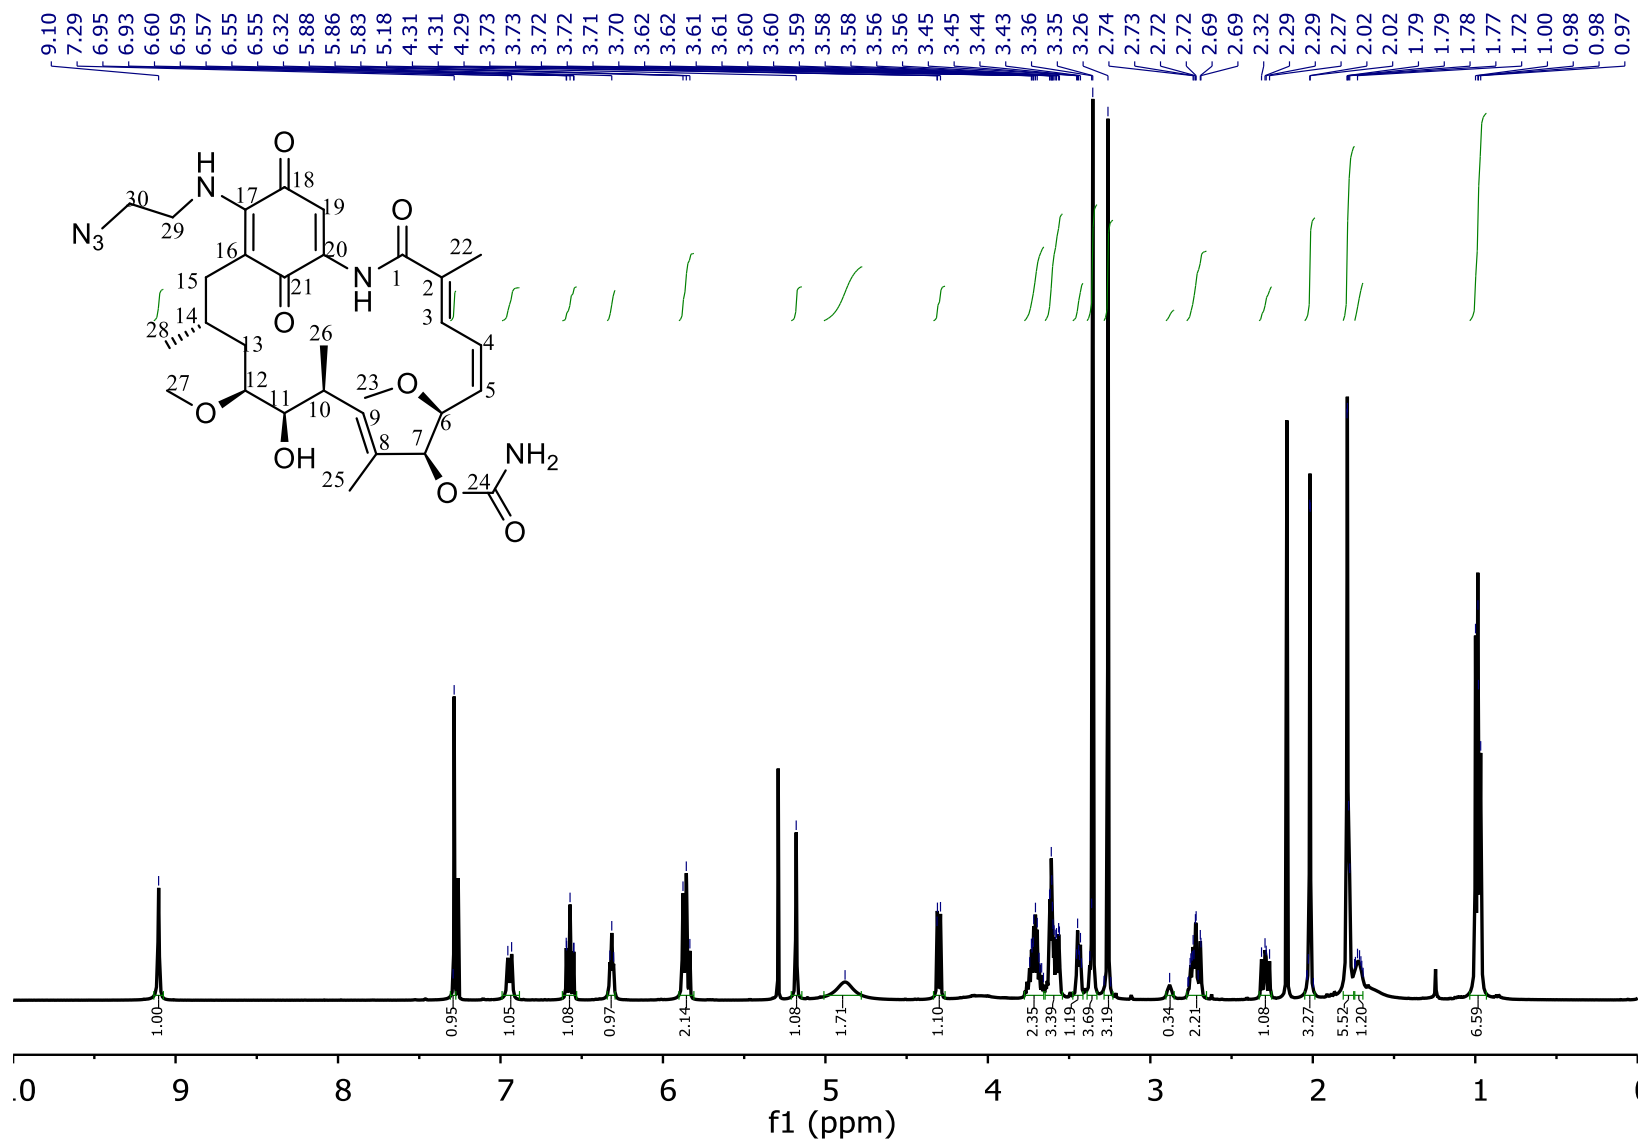

**Figure 132S.** <sup>1</sup>H NMR spectrum of compound **9** in CDCl<sub>3</sub>.

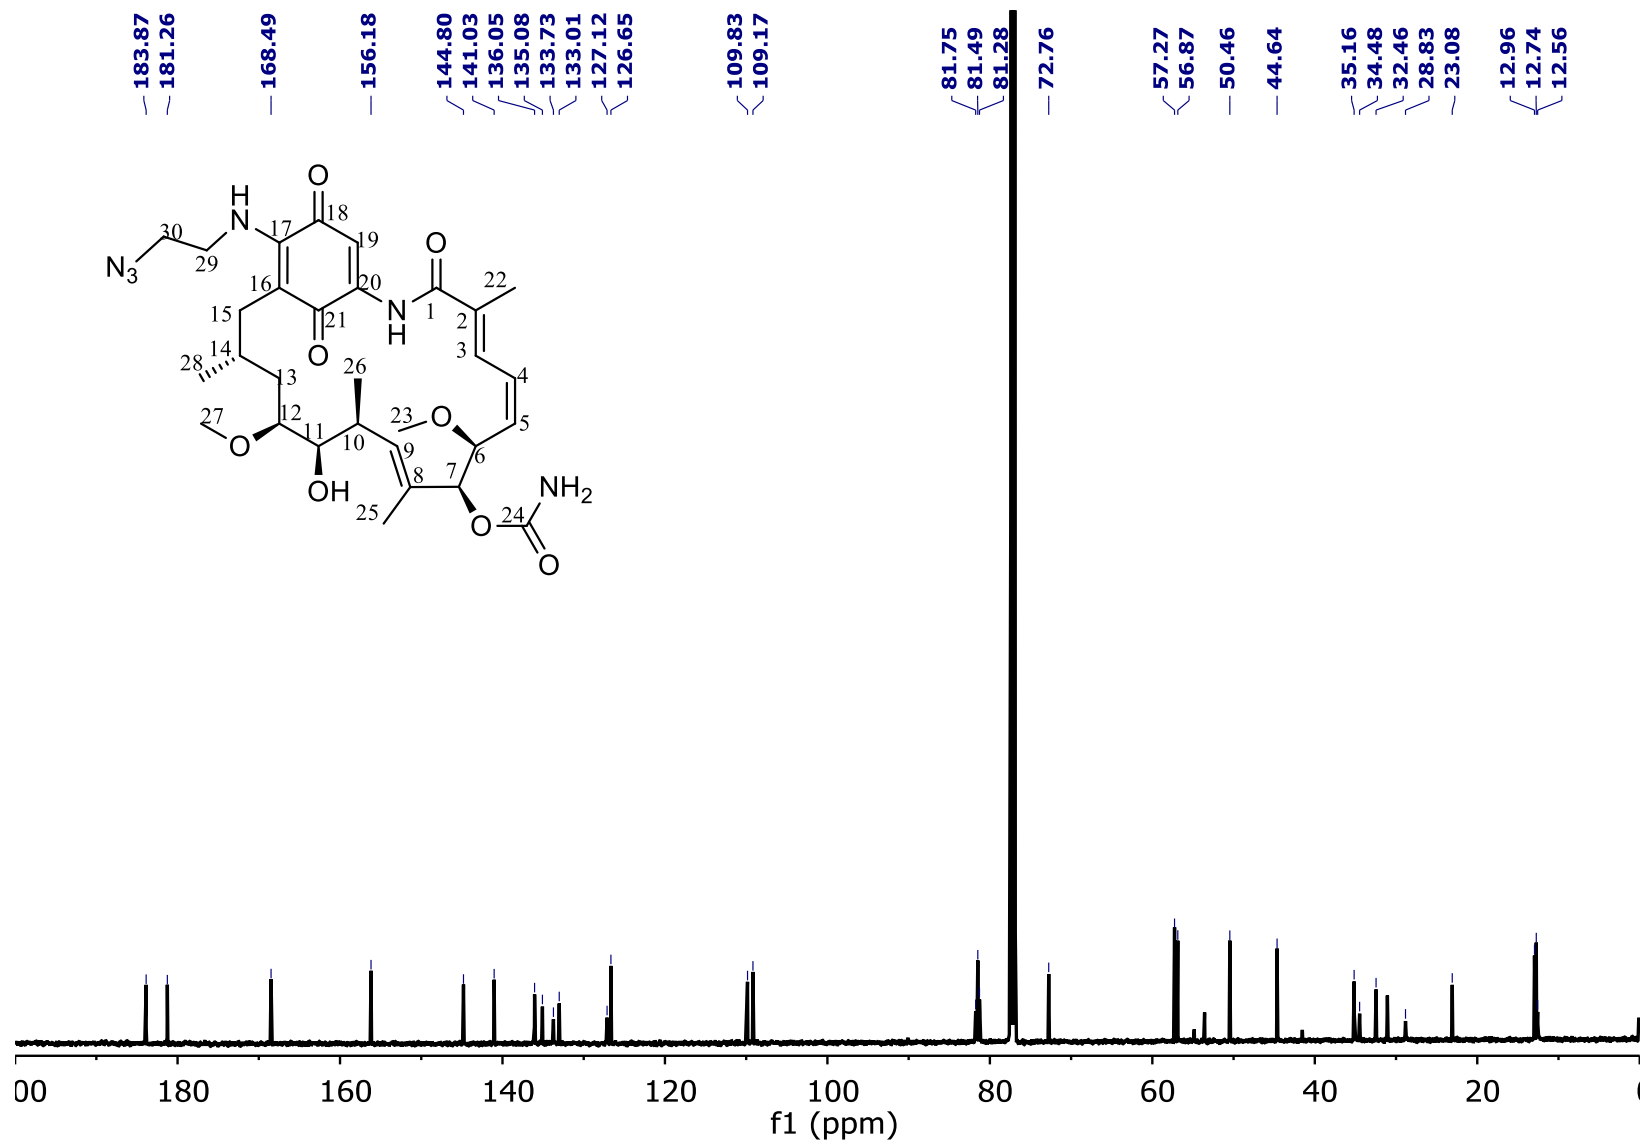

Figure 133S. <sup>13</sup>C NMR spectrum of compound **9** in CDCl<sub>3</sub>.

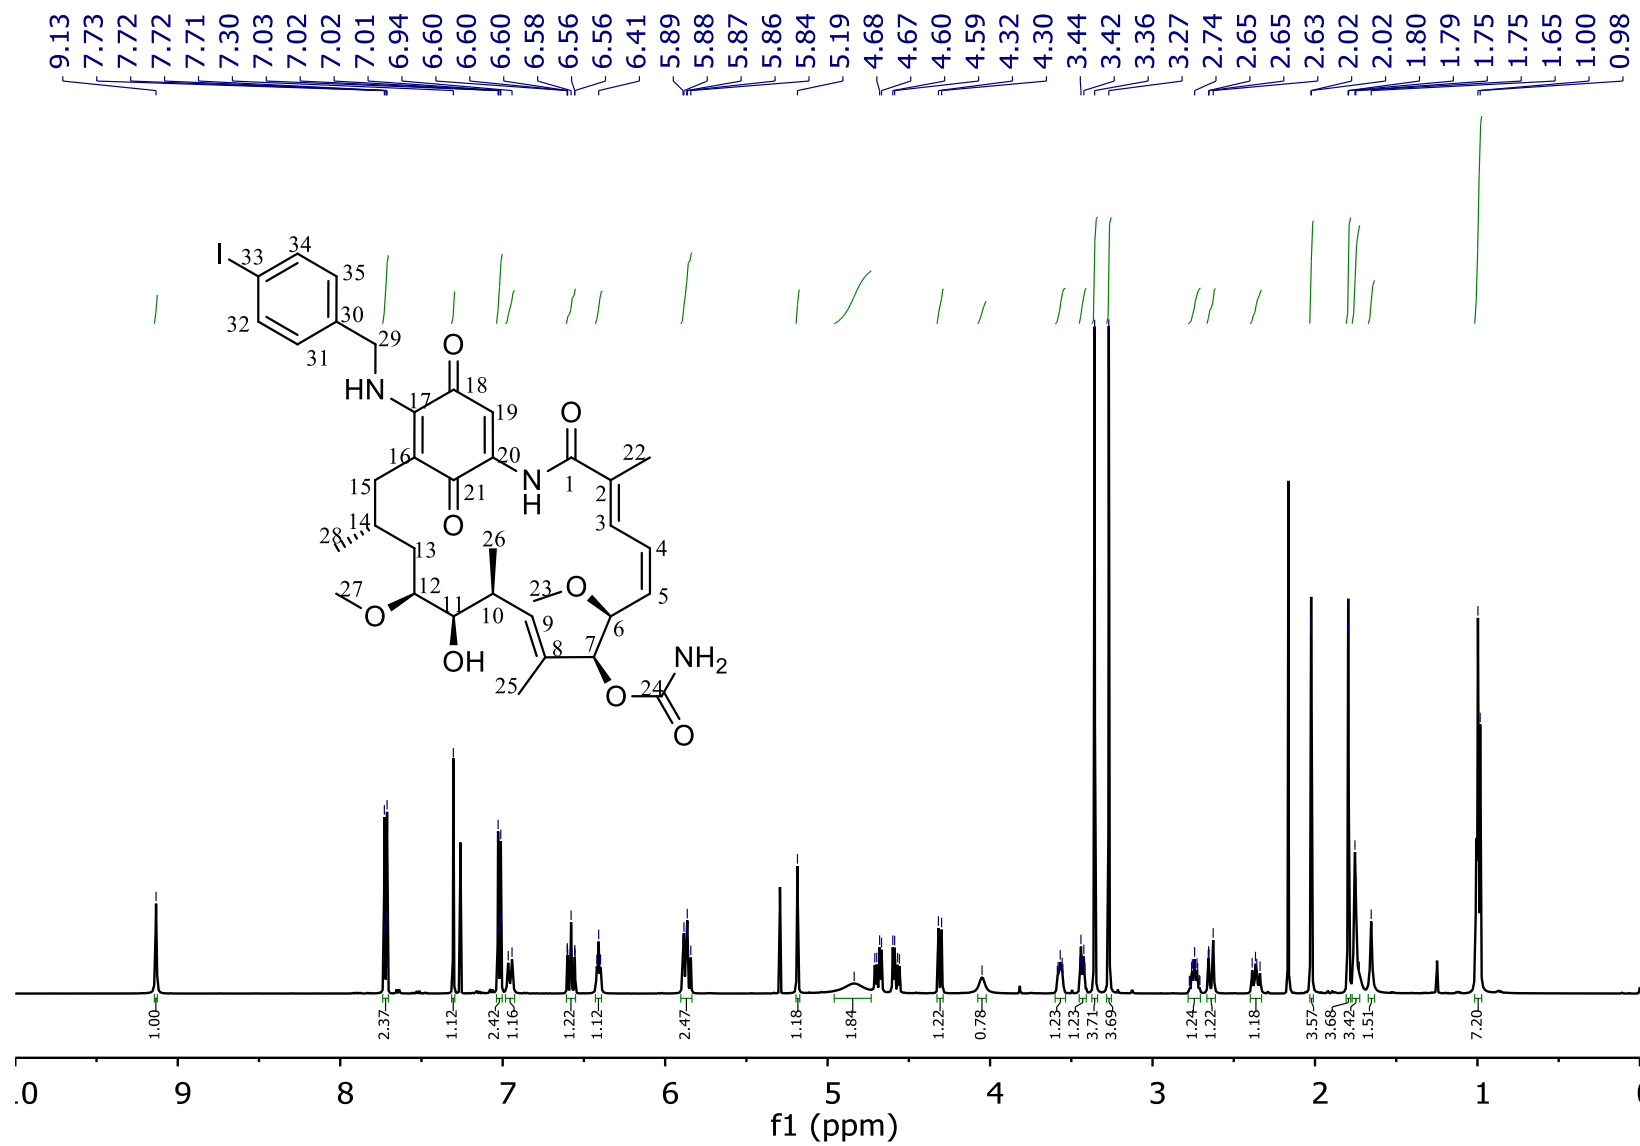

Figure 134S. <sup>1</sup>H NMR spectrum of compound 10 in CDCl<sub>3</sub>.

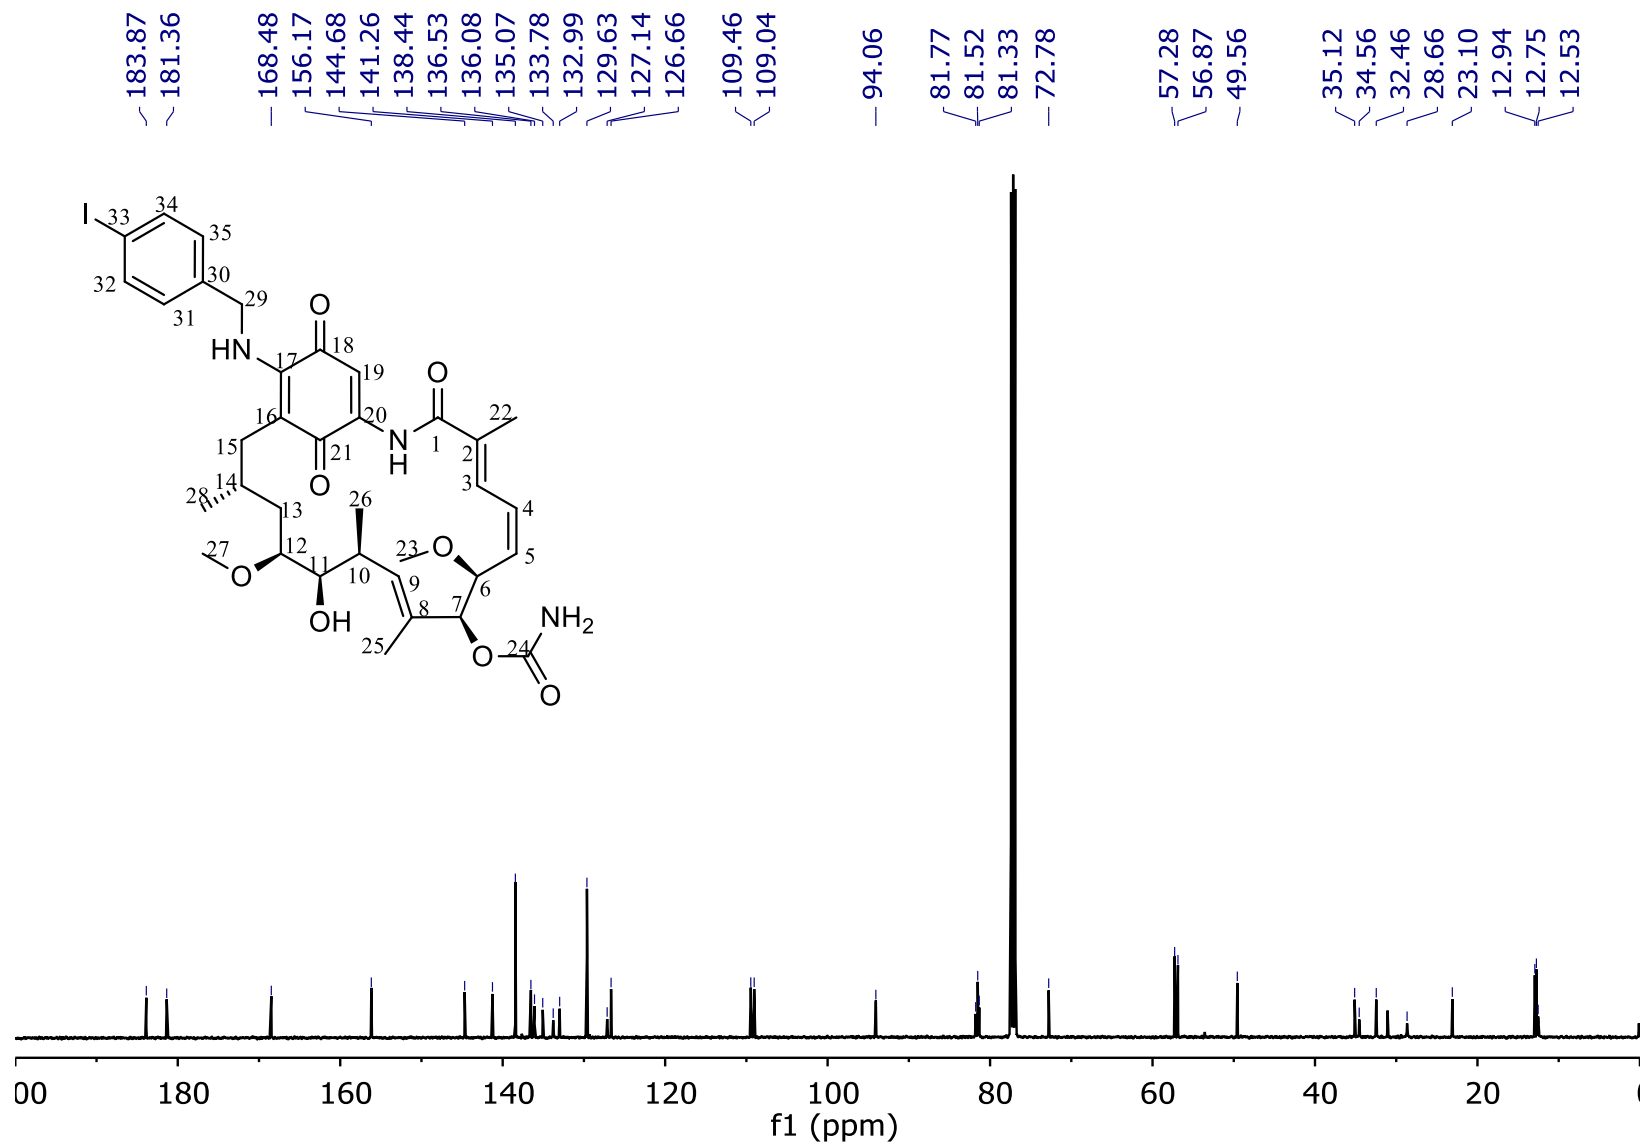

Figure 135S. <sup>13</sup>C NMR spectrum of compound 10 in CDCl<sub>3</sub>.

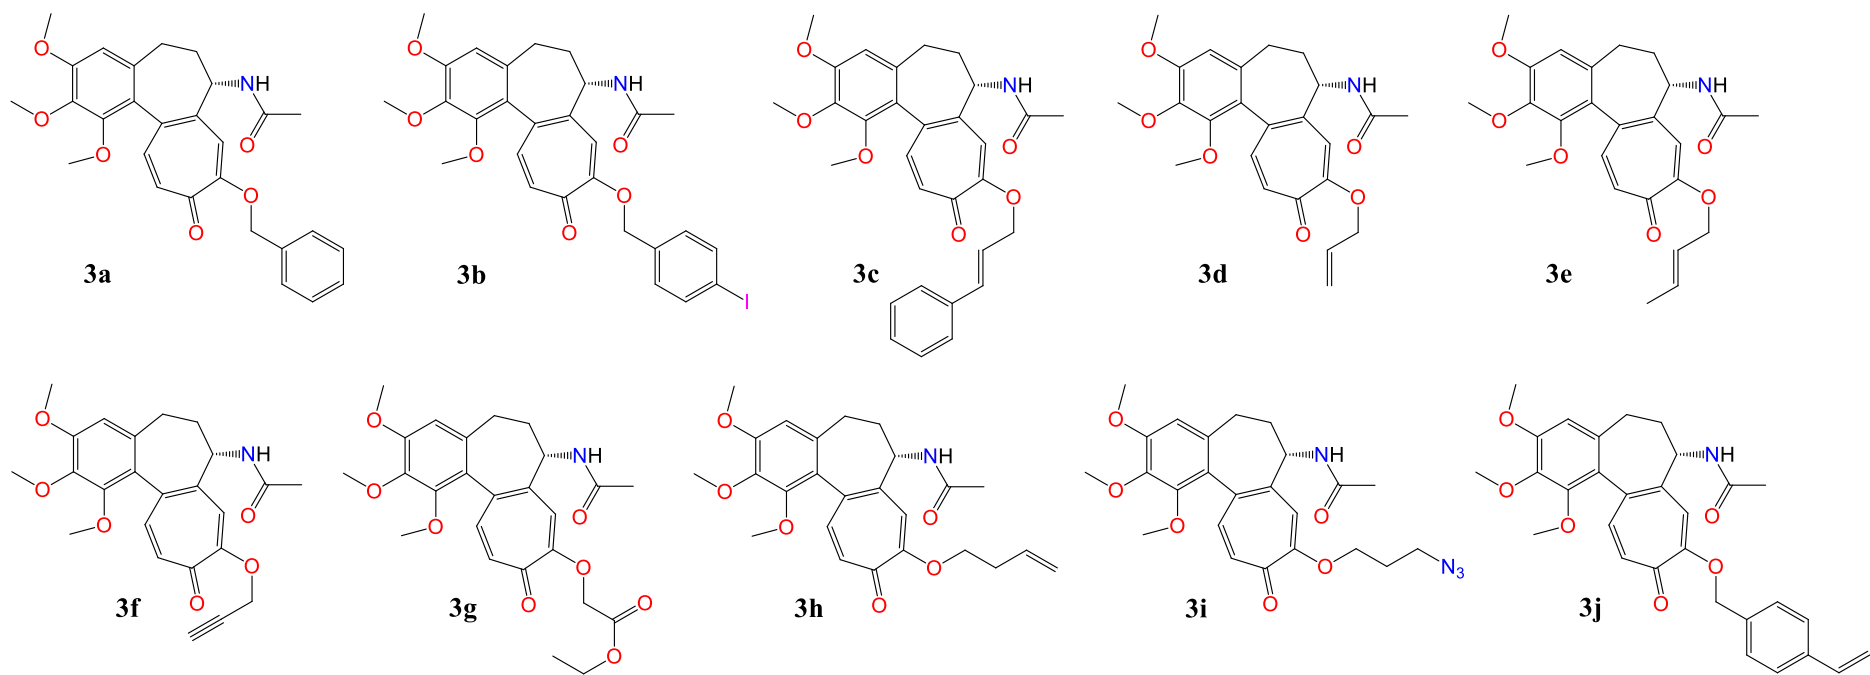

**Figure 136S.** Structures of all novel chemical entities **3a-3j** presented in ChemDraw 12.0 format.

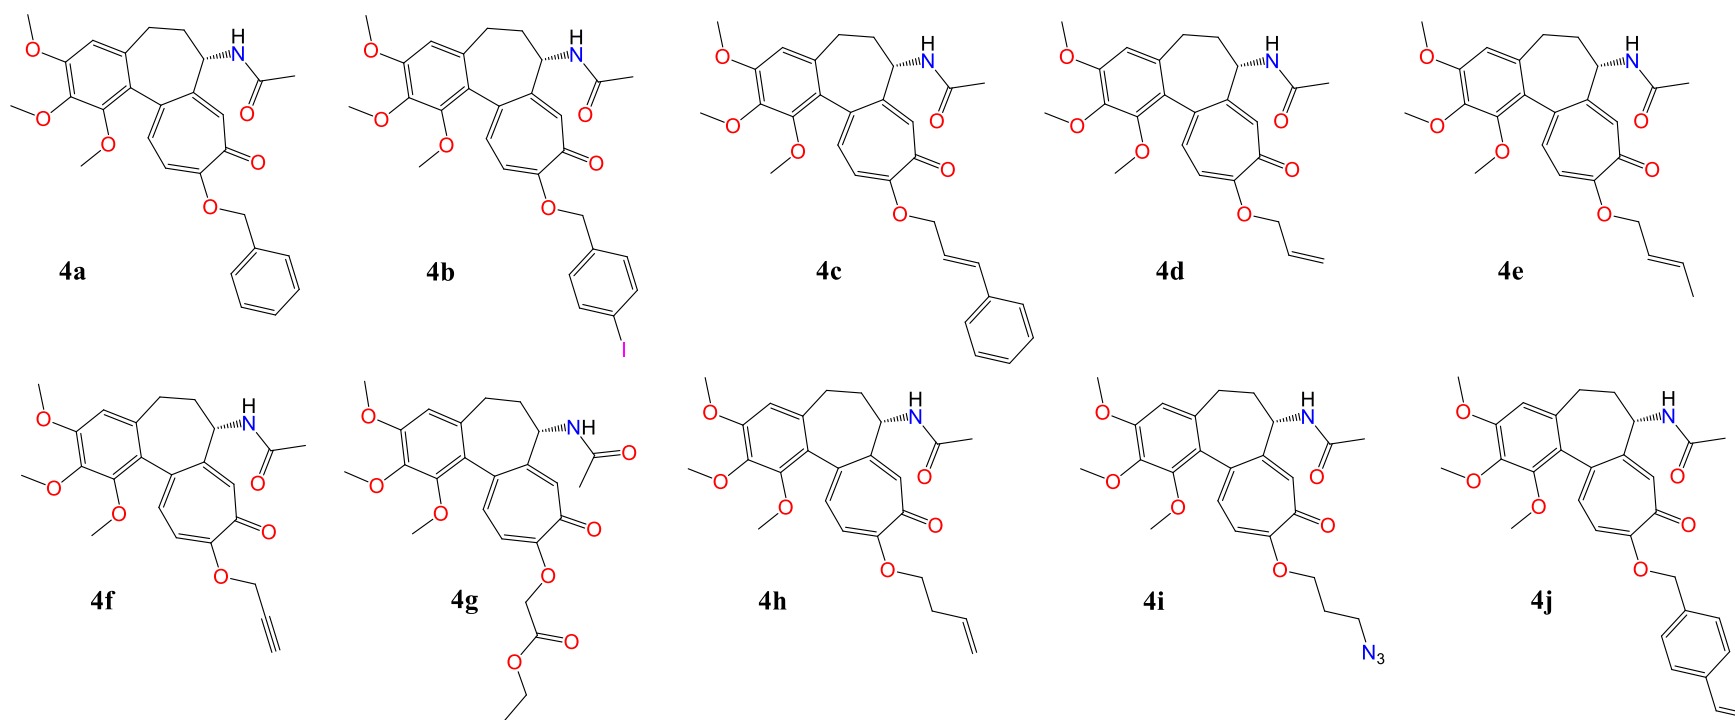

**Figure 137S.** Structures of all novel chemical entities **4a-4j** presented in ChemDraw 12.0 format.



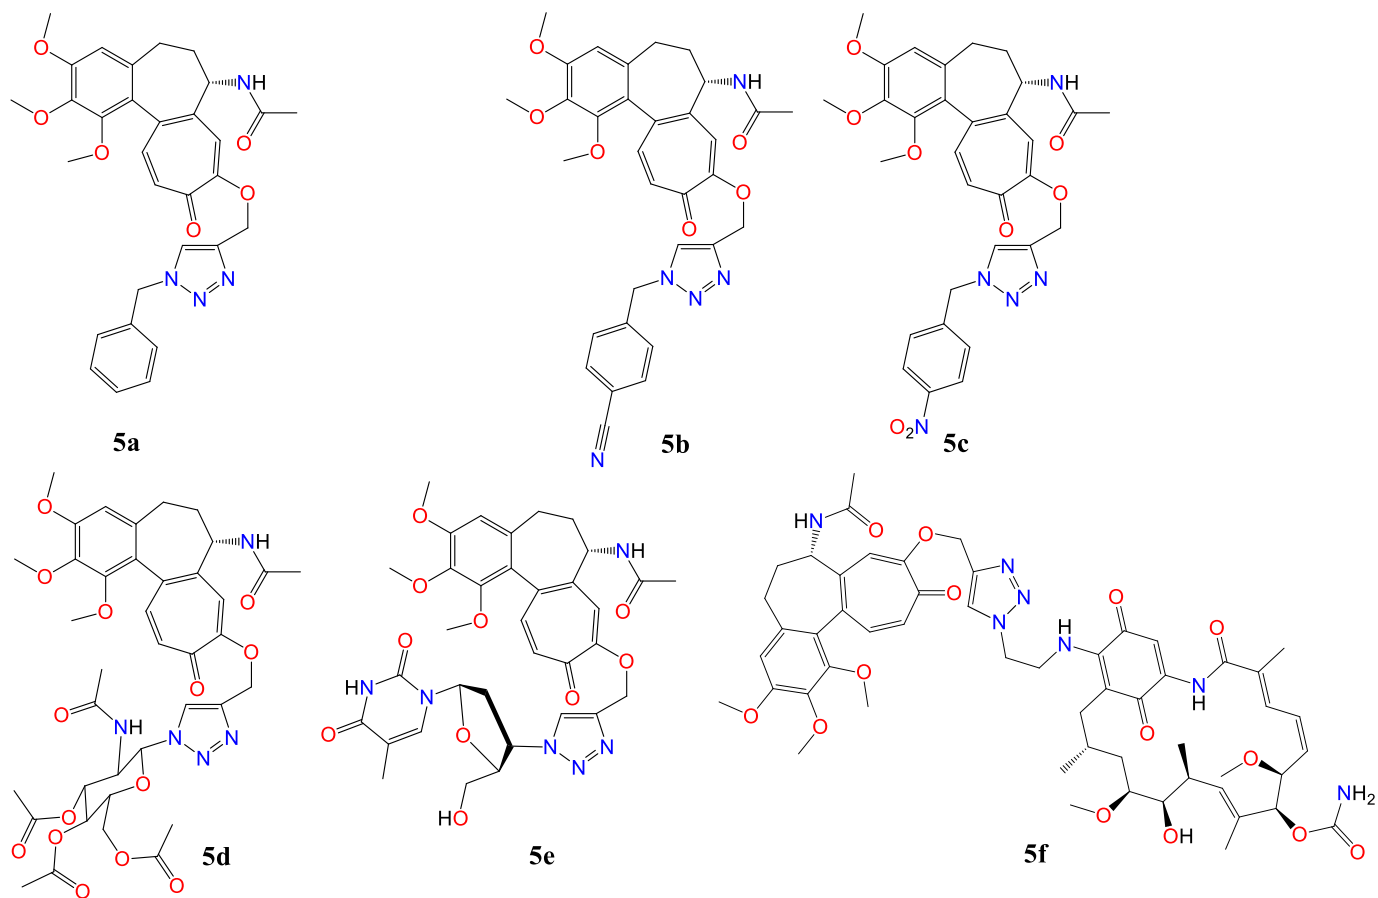

**Figure 138S.** Structures of all novel chemical entities **5a-5f** presented in ChemDraw 12.0 format.

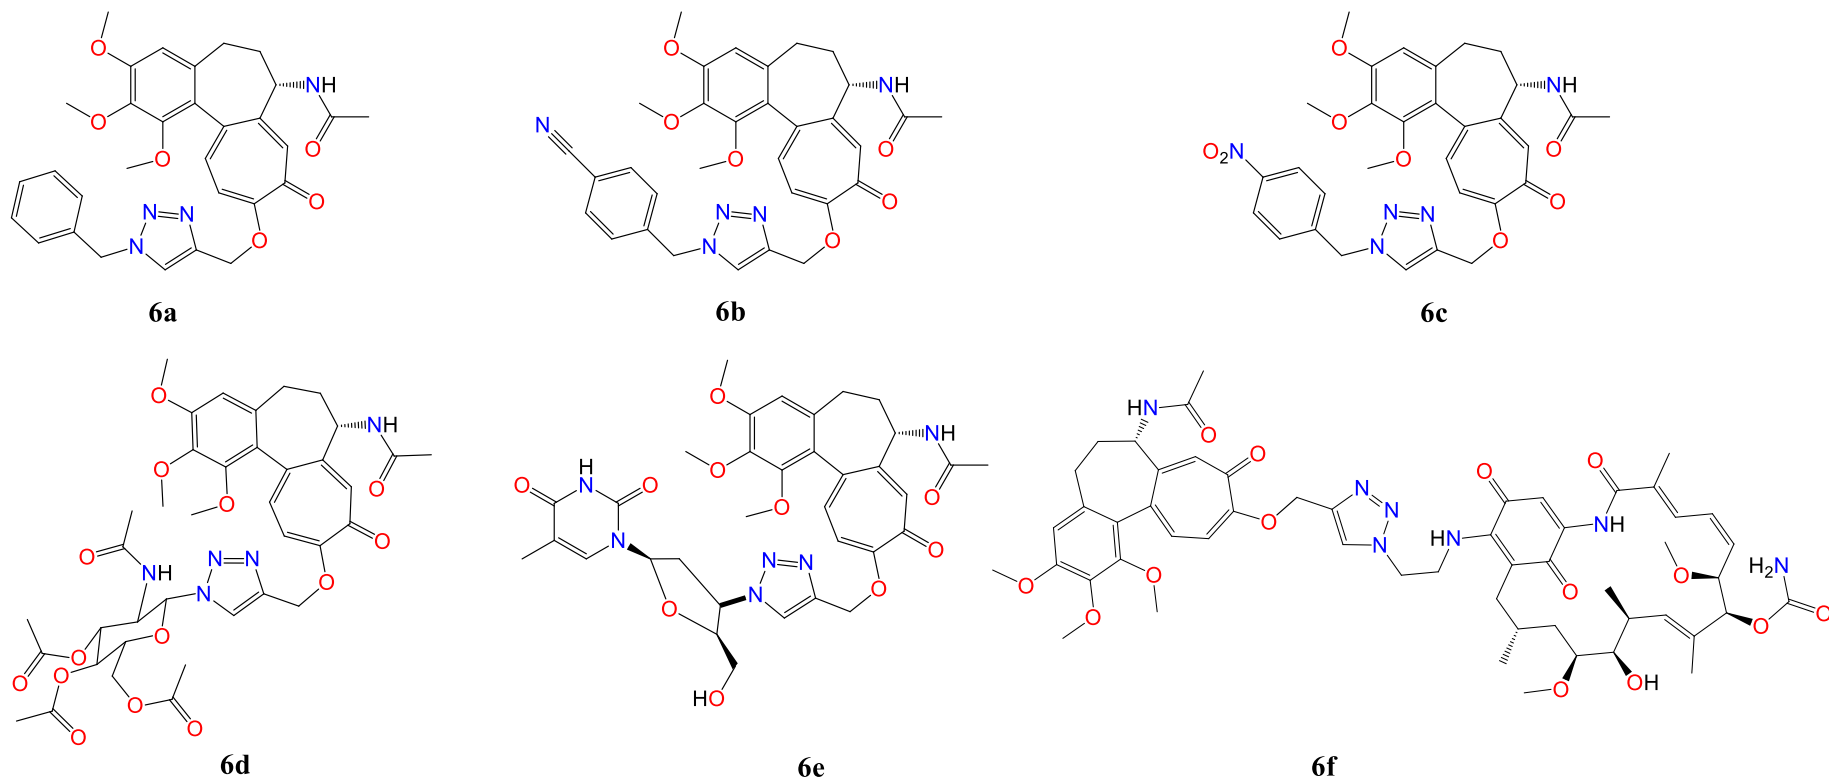

**Figure 139S.** Structures of all novel chemical entities **6a-6f** presented in ChemDraw 12.0 format.

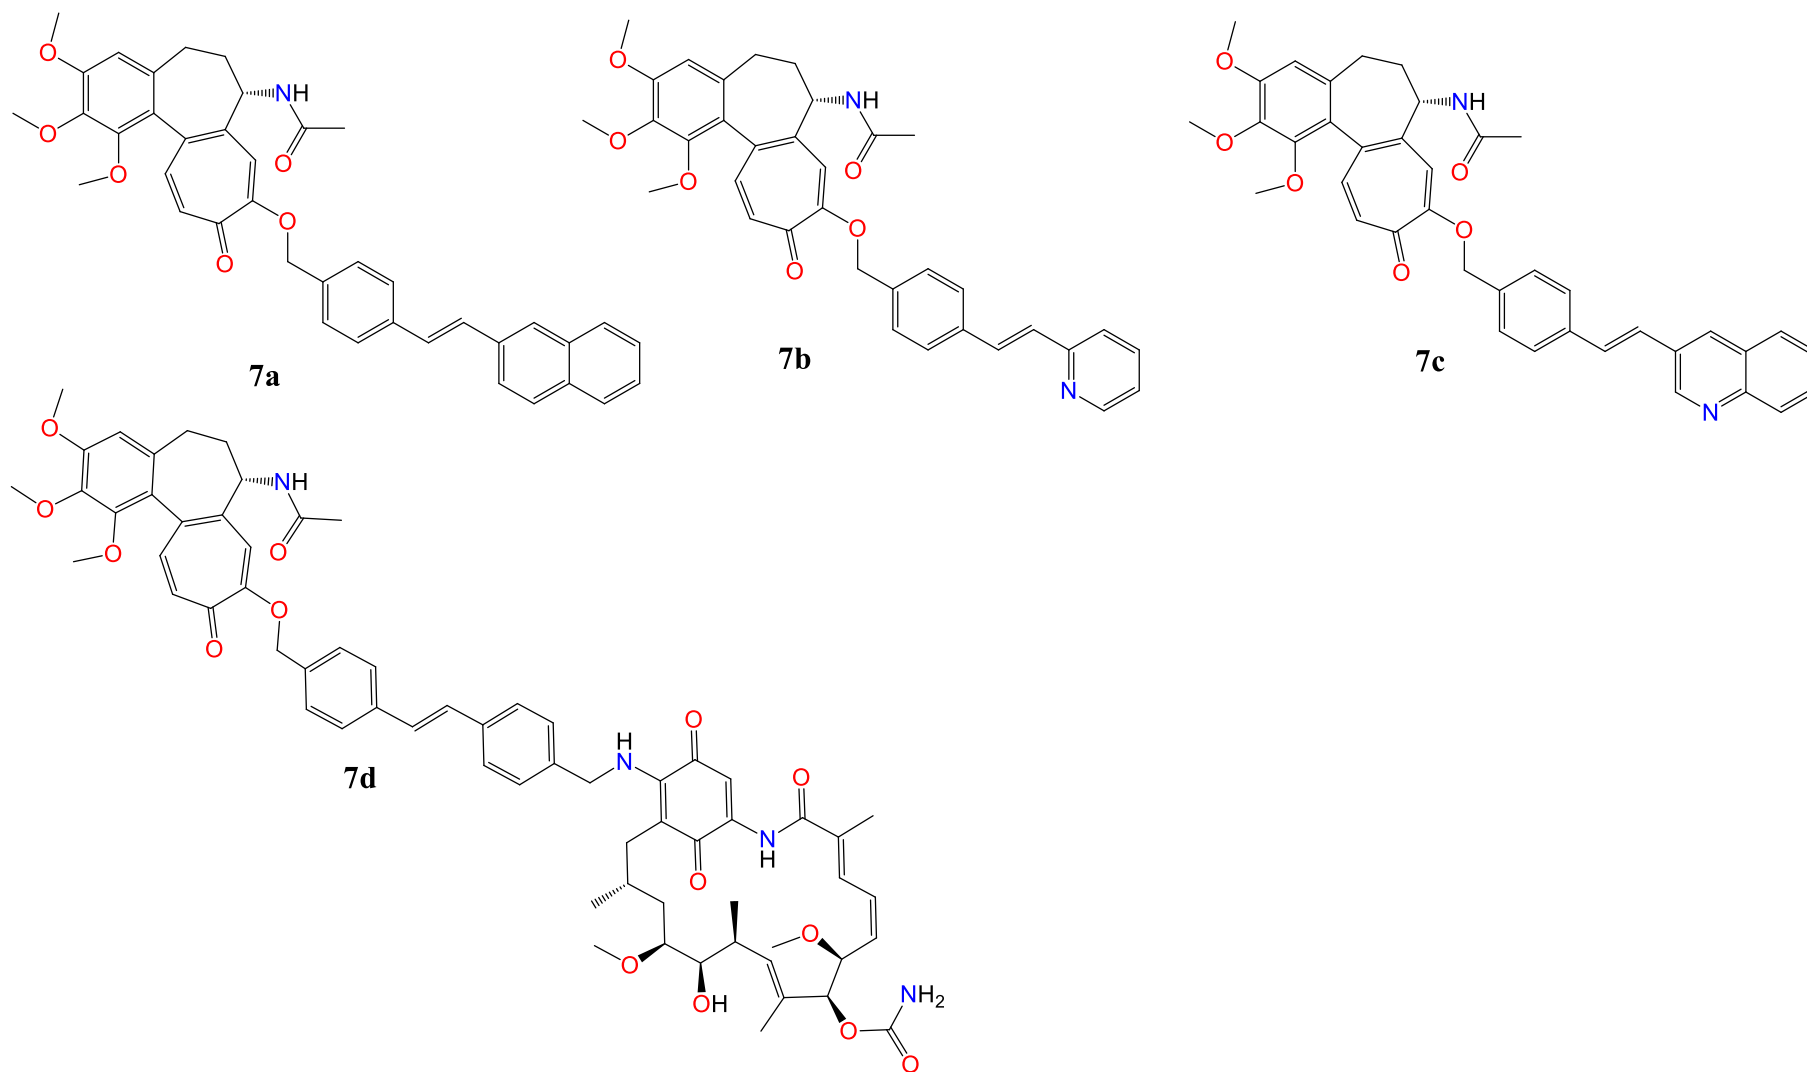

**Figure 140S.** Structures of all novel chemical entities **7a-7d** presented in ChemDraw 12.0 format.

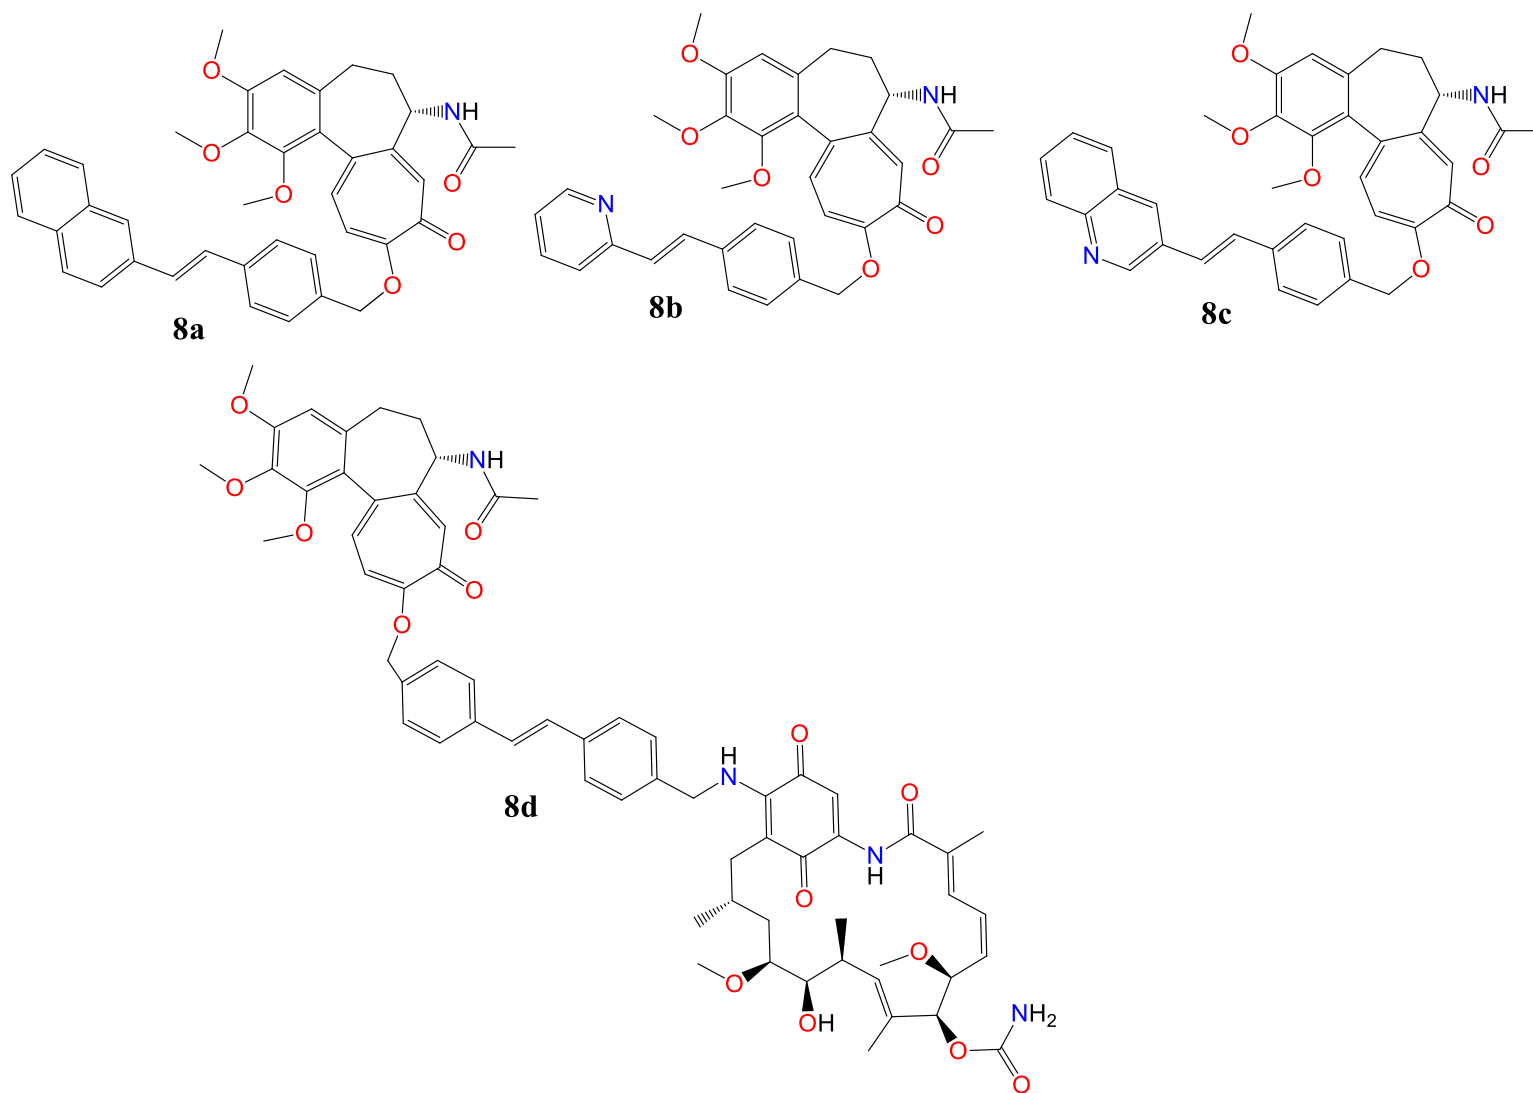

**Figure 141S.** Structures of all novel chemical entities **8a-8d** presented in ChemDraw 12.0 format.

- (1) Ravelli, R. B. G.; Gigant, B.; Curmi, P. A.; Jourdain, I.; Lachkar, S.; Sobel, A.; Knossow, M. Insight into Tubulin Regulation from a Complex with Colchicine and a Stathmin-like Domain. *Nature* **2004**, *428* (6979), 198–202. <https://doi.org/10.1038/nature02393>.
- (2) *Scigress Package FJ 2.6 /EU 3.1.9./ 2008-2019*; Fujitsu, Japan.
- (3) Cook, J. W.; Loudon, J. D. *The Alkaloids*; Academic Press: New York, NY, 1952; Vol. 2.
